# Supplementary material for: A high-resolution map of transcriptional repression
Source: eLife. 2017 Mar 20;6:e22767. doi: 10.7554/eLife.22767 (PMC5373822; doi:10.7554/eLife.22767)
Supplement: Figure 1—source data 1. — DOI: http://dx.doi.org/10.7554/eLife.22767.003 [file elife-22767-fig1-data1.xlsx]

## Sheet: Figure 1B
Figure 1B: Ikaros and EBF ChIP-qPCR
Data from 3 biological replicates
	Antibody	Time	Replicate 1	Replicate 2	Replicate 3	Average	SEM	Student T test
	Ikaros	0min	0	0	0	0	0
	Ikaros	5min	2.46	2.26	2.155	2.29167	0.0894582	0.00076018
	Ikaros	15min	2.64	2.95	2.515	2.70167	0.129304	0.0011414
	Ikaros	30min	2.38	2.71	2.355	2.48167	0.114395	0.00105904
	Ikaros	60min	2.83	2.94	2.385	2.71833	0.169665	0.00193651
	Ikaros	360min	2.9	2.465	2.1	2.48833	0.231235	0.00426262
	EBF	0min	0	0	0	0	0
	EBF	5min	0.115	0.17	0.24	0.175	0.0361709	0.0200824
	EBF	15min	-0.255	-0.37	-0.33	-0.318333	0.0337062	0.00551312
	EBF	30min	-1.4	-1.02	-1.07	-1.16333	0.11921	0.00516909
	EBF	60min	-1.505	-1.275	-1.66	-1.48	0.111841	0.00283104
	EBF	360min	-0.93	-0.865	-0.725	-0.84	0.0604842	0.00257237
Figure 1B %input
Data from 3 independent biological replicates
	Gene	time	antibody	Replicate 1	Replicate 2	Replicate 3	Average	SEM	Student T test
	Rex1	0min	EBF	0.00966462	0.0712412	0.0380451	0.0396503	0.0154098
	Rex1	5min	EBF	0.0372124	0.0302663	0.0750427	0.0475072	0.012049	0.389718
	Rex1	15min	EBF	0.0316188	0.0461942	0.0335826	0.0371319	0.0039547	0.435096
	Rex1	30min	EBF	0.0149566	0.0278507	0.0286337	0.0238137	0.0038402	0.193272
	Rex1	60min	EBF	0.0171806	0.036622	0.0157758	0.0231928	0.00582562	0.159385
	Rex1	360min	EBF	0.0180348	0.0481559	0.0574661	0.041219	0.0103053	0.456609
	Igll1	0min	EBF	0.384733	0.319493	0.431926	0.378717	0.0282287
	Igll1	5min	EBF	0.416656	0.359448	0.510101	0.428735	0.0380248	0.0363114
	Igll1	15min	EBF	0.322401	0.247218	0.343613	0.304411	0.0253265	0.00510812
	Igll1	30min	EBF	0.145786	0.157547	0.205735	0.169689	0.0158825	0.00637299
	Igll1	60min	EBF	0.135553	0.132023	0.136678	0.134751	0.0012146	0.00799302
	Igll1	360min	EBF	0.20193	0.175416	0.261314	0.212887	0.0219922	0.00235943
	Rex1	0min	Ikaros	0.0185418	0.0364953	0.0315516	0.0288629	0.00463691
	Rex1	5min	Ikaros	0.0152181	0.0483231	0.040354	0.0346317	0.00863921	0.169445
	Rex1	15min	Ikaros	0.0185418	0.0388446	0.042803	0.0333965	0.00650793	0.158418
	Rex1	30min	Ikaros	0.0214471	0.0512557	0.0364953	0.0363994	0.00745226	0.0878281
	Rex1	60min	Ikaros	0.0420115	0.0782295	0.053804	0.058015	0.00923627	0.0218387
	Rex1	360min	Ikaros	0.0372124	0.0662404	0.0503752	0.051276	0.00726748	0.0128647
	Igll1	0min	Ikaros	0.0403001	0.0332352	0.0685764	0.0473706	0.00935072
	Igll1	5min	Ikaros	0.221738	0.159194	0.305418	0.228783	0.0366831	0.014875
	Igll1	15min	Ikaros	0.251203	0.256825	0.391981	0.300003	0.0398524	0.00962931
	Igll1	30min	Ikaros	0.209777	0.217465	0.350833	0.259358	0.0396563	0.0133795
	Igll1	60min	Ikaros	0.286564	0.255051	0.358205	0.29994	0.0264309	0.00305337
	Igll1	360min	Ikaros	0.300811	0.183501	0.293994	0.259435	0.0329247	0.0113575
