# Supplementary material for: A high-resolution map of transcriptional repression
Source: eLife. 2017 Mar 20;6:e22767. doi: 10.7554/eLife.22767 (PMC5373822; doi:10.7554/eLife.22767)
Supplement: Figure 2—figure supplement 1—source data 1. — DOI: http://dx.doi.org/10.7554/eLife.22767.008 [file elife-22767-fig2-figsupp1-data1.xlsx]

## Sheet: Figure S2B
Figure S2B: MNase-qPCR in split TEV cells with or without triptolide treatment
Data from 3 biological replicates
	Gene	Treatment	Replicate 1	Replicate 2	Replicate 3	Average	SEM	Student T test
	Igll1	Contr.	0.0169215	0.0188407	0.0225614	0.0194412	0.00165555
	Igll1	Rapa	0.433769	0.311003	0.314253	0.353009	0.0403913	0.00761421
	Igll1	Triptolide	0.0665231	0.0656073	0.0963882	0.0761729	0.0101111
	Igll1	Triptolide+Rapa	0.594604	0.528509	0.535887	0.553	0.0209106	0.00153748
	Myc	Contr.	0.231647	0.194117	0.219151	0.214972	0.0110336
	Myc	Rapa	0.45376	0.369847	0.386891	0.403499	0.0256073	0.00399344
	Myc	Triptolide	0.270744	0.190122	0.17739	0.212752	0.0292278
	Myc	Triptolide+Rapa	0.662044	0.433769	0.598739	0.564851	0.0680409	0.0117361
