# Supplementary material for: A high-resolution map of transcriptional repression
Source: eLife. 2017 Mar 20;6:e22767. doi: 10.7554/eLife.22767 (PMC5373822; doi:10.7554/eLife.22767)
Supplement: Figure 2—source data 1. — DOI: http://dx.doi.org/10.7554/eLife.22767.006 [file elife-22767-fig2-data1.xlsx]

## Sheet: Figure 2B
Figure 2B: RNAP2 ChIP-qPCR
Date from 3 biological replicates
	Gene	Primer	Time	Replicate 1	Replicate 2	Replicate 3	Average	SEM	Student T test
	Igll1	Prom.	0min	1.14626	0.780207	0.733022	0.886494	0.130593
	Igll1	Prom.	5min	0.597466	0.683934	0.705603	0.662334	0.0330318	0.152002
	Igll1	Prom.	15min	0.432847	0.47039	0.242647	0.381961	0.0704953	0.0247873
	Igll1	Prom.	30min	0.270168	0.29462	0.16176	0.242183	0.0408261	0.0160997
	Igll1	Prom.	60min	0.204041	0.248605	0.126038	0.192895	0.0358184	0.0157731
	Igll1	Prom.	360min	0.165159	0.160087	0.171577	0.165608	0.00332445	0.0157823
	Igll1	+1.3kb	0min	0.505901	0.463914	0.408081	0.459299	0.0283324
	Igll1	+1.3kb	5min	0.277763	0.356489	0.391458	0.341903	0.0336212	0.0976945
	Igll1	+1.3kb	15min	0.266448	0.228763	0.142786	0.212666	0.0365943	0.000726805
	Igll1	+1.3kb	30min	0.211969	0.150928	0.106722	0.15654	0.0305116	0.000167621
	Igll1	+1.3kb	60min	0.189718	0.130482	0.0843147	0.134838	0.0305051	0.000118271
	Igll1	+1.3kb	360min	0.137922	0.103087	0.0919458	0.110985	0.0138474	0.00108089
	Igll1	TTS	0min	0.405262	0.391458	0.356489	0.384403	0.0145149
	Igll1	TTS	5min	0.30501	0.392817	0.399683	0.365837	0.0304778	0.352717
	Igll1	TTS	15min	0.238478	0.244334	0.147822	0.210211	0.0312407	0.00534043
	Igll1	TTS	30min	0.197774	0.178244	0.101316	0.159111	0.0294428	0.00221118
	Igll1	TTS	60min	0.179484	0.157883	0.0878952	0.141754	0.027642	0.00146561
	Igll1	TTS	360min	0.0878952	0.10273	0.0872881	0.0926377	0.00504914	0.00114517
	Myc	Prom.	0min	1.02949	0.977337	1.02238	1.00973	0.0163283
	Myc	Prom.	5min	1.07321	1.18668	1.04386	1.10125	0.0435468	0.131266
	Myc	Prom.	15min	0.727958	0.911888	0.774817	0.804888	0.0551835	0.0515481
	Myc	Prom.	30min	0.575117	0.710511	0.58924	0.624956	0.0429711	0.0114663
	Myc	Prom.	60min	0.504151	0.61002	0.401071	0.505081	0.0603202	0.0104288
	Myc	Prom.	360min	0.498936	0.498936	0.514744	0.504206	0.0052693	0.000445011
	Myc	+1.0kb	0min	0.386068	0.277763	0.58924	0.417691	0.0912952
	Myc	+1.0kb	5min	0.33843	0.329175	0.257372	0.308326	0.0256165	0.220767
	Myc	+1.0kb	15min	0.319066	0.242647	0.237653	0.266455	0.026345	0.135813
	Myc	+1.0kb	30min	0.24097	0.30501	0.206173	0.250718	0.028945	0.147767
	Myc	+1.0kb	60min	0.26278	0.226397	0.178244	0.222474	0.0244821	0.10879
	Myc	+1.0kb	360min	0.226397	0.231154	0.225614	0.227722	0.00173107	0.0885658
	Myc	TTS	0min	0.291573	0.142786	0.260062	0.231474	0.0452671
	Myc	TTS	5min	0.236011	0.192366	0.253829	0.227402	0.0182574	0.452814
	Myc	TTS	15min	0.178863	0.112807	0.158981	0.150217	0.0195658	0.0440447
	Myc	TTS	30min	0.214185	0.133687	0.116381	0.154751	0.030134	0.0934912
	Myc	TTS	60min	0.165732	0.111254	0.106353	0.12778	0.0190291	0.0535331
	Myc	TTS	360min	0.125167	0.0891222	0.124734	0.113008	0.0119435	0.0359775
	Zfp36	Prom.	0min	1.13047	0.827556	1.01532	0.991115	0.0882783
	Zfp36	Prom.	5min	1.11491	0.905589	1.13834	1.05295	0.0739881	0.134523
	Zfp36	Prom.	15min	1.01532	0.782915	0.977337	0.925189	0.0719769	0.0581534
	Zfp36	Prom.	30min	1.20324	1.19908	1.01532	1.13921	0.0619604	0.161221
	Zfp36	Prom.	60min	1.31215	1.14229	1.25434	1.23626	0.0498599	0.0119141
	Zfp36	Prom.	360min	1.49167	1.18668	1.37262	1.35032	0.0887465	4.90569e-06
	Zfp36	+0.6kb	0min	0.258266	0.190377	0.298733	0.249125	0.0316119
	Zfp36	+0.6kb	5min	0.276802	0.246888	0.302903	0.275531	0.0161827	0.116431
	Zfp36	+0.6kb	15min	0.266448	0.229558	0.313585	0.269864	0.0243166	0.0793189
	Zfp36	+0.6kb	30min	0.231957	0.544094	0.363979	0.38001	0.0904621	0.185703
	Zfp36	+0.6kb	60min	0.401071	0.431349	0.34674	0.393053	0.0247512	0.0614053
	Zfp36	+0.6kb	360min	0.435857	0.490365	0.498936	0.475053	0.0197534	0.0132994
	Zfp36	TTS	0min	0.344345	0.206889	0.270168	0.273801	0.0397218
	Zfp36	TTS	5min	0.379436	0.204749	0.357726	0.31397	0.0549691	0.131298
	Zfp36	TTS	15min	0.284584	0.293601	0.270168	0.282784	0.00682412	0.426123
	Zfp36	TTS	30min	0.34674	0.287559	0.270168	0.301489	0.023176	0.202885
	Zfp36	TTS	60min	0.483614	0.478612	0.281641	0.414622	0.0665064	0.100867
	Zfp36	TTS	360min	0.391458	0.328036	0.392817	0.37077	0.0213705	0.0301003

## Sheet: Figure 2C
Figure 2C: MNase-qPCR
Data from 3 biological replicates
	Gene	Primer	Time	Replicate 1	Replicate 2	Replicate 3	Average	SEM	Student T test
	Igll1	Prom.	0min	0.0448111	0.0379436	0.0212705	0.0346751	0.00698932
	Igll1	Prom.	5min	0.192776	0.151249	0.0984135	0.14748	0.0273053	0.0156588
	Igll1	Prom.	15min	0.3795	0.5	0.25437	0.377957	0.0709115	0.0176346
	Igll1	Prom.	30min	0.389582	0.488016	0.296273	0.39129	0.0553579	0.00987897
	Igll1	Prom.	60min	0.323088	0.619854	0.429283	0.457408	0.0868154	0.0203359
	Igll1	Prom.	360min	0.353553	0.550953	0.488016	0.464174	0.0582178	0.0100531
	Igll1	TSS	0min	0.0419554	0.0374212	0.0347944	0.038057	0.00209149
	Igll1	TSS	5min	0.185565	0.122004	0.123279	0.143616	0.0209779	0.0155432
	Igll1	TSS	15min	0.535887	0.37501	0.343885	0.418261	0.0594954	0.0110416
	Igll1	TSS	30min	0.613442	0.385553	0.346277	0.448424	0.0832845	0.0185193
	Igll1	TSS	60min	0.564482	0.530344	0.447513	0.514113	0.0347278	0.00235704
	Igll1	TSS	360min	0.714497	0.493116	0.494828	0.567481	0.0735099	0.00889438
	Igll1	+200nt	0min	0.568408	0.694959	0.482968	0.582112	0.0615789
	Igll1	+200nt	5min	0.471392	0.469761	0.486327	0.475827	0.00527128	0.124656
	Igll1	+200nt	15min	0.515842	0.582367	0.584389	0.560866	0.0225196	0.385284
	Igll1	+200nt	30min	0.586417	0.655197	0.671286	0.637633	0.0260258	0.251265
	Igll1	+200nt	60min	0.602904	0.622006	0.596668	0.607193	0.00762227	0.344216
	Igll1	+200nt	360min	0.568408	0.641713	0.709562	0.639894	0.0407576	0.285015
	Myc	Prom.	0min	0.0853775	0.0813339	0.174343	0.113685	0.0303515
	Myc	Prom.	5min	0.0994421	0.0994421	0.163232	0.120706	0.0212635	0.261363
	Myc	Prom.	15min	0.168989	0.147624	0.218393	0.178335	0.020957	0.0149811
	Myc	Prom.	30min	0.259715	0.203768	0.354781	0.272755	0.0440785	0.00656029
	Myc	Prom.	60min	0.408951	0.271684	0.313166	0.331267	0.0406461	0.0292219
	Myc	Prom.	360min	0.34748	0.282241	0.357249	0.32899	0.0235438	0.00608368
	Myc	TSS	0min	0.073812	0.134437	0.185565	0.131271	0.0322992
	Myc	TSS	5min	0.0899333	0.145592	0.13167	0.122398	0.0167226	0.366011
	Myc	TSS	15min	0.118668	0.193446	0.244855	0.185656	0.0366348	0.00379499
	Myc	TSS	30min	0.135842	0.227667	0.264255	0.209255	0.0381957	0.00654918
	Myc	TSS	60min	0.223756	0.301452	0.25349	0.259566	0.0226336	0.0262023
	Myc	TSS	360min	0.264255	0.37501	0.362236	0.333833	0.0349843	0.0045319
	Myc	+350nt	0min	0.668964	0.413225	0.512278	0.531489	0.0744476
	Myc	+350nt	5min	0.719467	0.356013	0.359733	0.478404	0.120536	0.230474
	Myc	+350nt	15min	0.752623	0.493116	0.438303	0.561348	0.0969381	0.31168
	Myc	+350nt	30min	0.632878	0.594604	0.442884	0.556789	0.0580143	0.389077
	Myc	+350nt	60min	0.685391	0.68302	0.584389	0.650933	0.0332794	0.130233
	Myc	+350nt	360min	0.626332	0.493116	0.65293	0.590793	0.0494381	0.19298
	Zfp36	Prom.	0min	0.408951	0.301452	0.474671	0.395025	0.0504865
	Zfp36	Prom.	5min	0.385957	0.261521	0.333325	0.326934	0.0360632	0.103356
	Zfp36	Prom.	15min	0.362962	0.252613	0.284204	0.299926	0.0328108	0.092159
	Zfp36	Prom.	30min	0.339968	0.266093	0.320856	0.308972	0.0221383	0.0673366
	Zfp36	Prom.	60min	0.316974	0.268874	0.213899	0.266582	0.0297772	0.100494
	Zfp36	Prom.	360min	0.293979	0.157672	0.133972	0.195208	0.0498574	0.0531468
	Zfp36	TSS	0min	0.091823	0.0960547	0.0896222	0.0925	0.0018875
	Zfp36	TSS	5min	0.133972	0.0772137	0.0679209	0.0930354	0.0206432	0.49091
	Zfp36	TSS	15min	0.148651	0.0896222	0.106211	0.114828	0.0175764	0.175278
	Zfp36	TSS	30min	0.135842	0.0921418	0.130308	0.119431	0.0137376	0.111738
	Zfp36	TSS	60min	0.173139	0.0883883	0.0893121	0.116946	0.0280974	0.240793
	Zfp36	TSS	360min	0.109197	0.0712977	0.122004	0.100833	0.0152233	0.337136
	Zfp36	+200nt	0min	0.408962	0.339151	0.404721	0.384278	0.0225966
	Zfp36	+200nt	5min	0.349906	0.283221	0.371131	0.334752	0.0264843	0.0126132
	Zfp36	+200nt	15min	0.320865	0.477973	0.244008	0.347615	0.0688514	0.361902
	Zfp36	+200nt	30min	0.320865	0.362236	0.342696	0.341932	0.0119488	0.167177
	Zfp36	+200nt	60min	0.285198	0.392292	0.395021	0.357504	0.0361613	0.328292
	Zfp36	+200nt	360min	0.288179	0.32421	0.293209	0.301866	0.0112659	0.067621

## Sheet: Figure 2D
Figure 2D: Primary transcripts
Data from 4 biological replicates
	Primer	Time	Replicate 1	Replicate 2	Replicate 3	Replicate 4	Average	SEM	Student T test
	Igll1	0min	0.159596	0.110147	0.112656	0.100134	0.120633	0.0153187
	Igll1	5min	0.108819	0.10788	0.103845	0.0705603	0.097776	0.0105491	0.0643585
	Igll1	15min	0.060371	0.0554565	0.0471205	0.0436613	0.0516523	0.00440808	0.00345001
	Igll1	30min	0.0187106	0.0164018	0.0220588	0.0179795	0.0187877	0.00137646	0.00228351
	Igll1	60min	0.0129581	0.0107464	0.011821	0.0109343	0.011615	0.0005835	0.00170172
	Igll1	360min	0.0044871	0.00529006	0.00435685	0.00508337	0.00480434	0.000261336	0.00162518
	Myc	0min	0.081193	0.0611078	0.0740683	0.052556	0.0672313	0.00741272
	Myc	5min	0.0672184	0.0558422	0.0617464	0.0388754	0.0559206	0.00708776	0.00583865
	Myc	15min	0.0559391	0.0445788	0.0472841	0.0393498	0.0467879	0.00400272	0.00425336
	Myc	30min	0.030501	0.024097	0.0238065	0.0234788	0.0254708	0.0019416	0.00211515
	Myc	60min	0.0280666	0.0224056	0.0196068	0.0176401	0.0219298	0.002618	0.00139621
	Myc	360min	0.0263692	0.0241388	0.0239721	0.024097	0.0246443	0.000665187	0.00292711
	Zfp36	0min	0.00960166	0.00693206	0.00721392	0.00837323	0.00803022	0.000703908
	Zfp36	5min	0.0107092	0.00914691	0.0090523	0.00971884	0.00965682	0.000439304	0.00361188
	Zfp36	15min	0.0189062	0.0128463	0.0115377	0.0114184	0.0136771	0.00204701	0.0125245
	Zfp36	30min	0.018453	0.0173972	0.0141554	0.0105435	0.0151373	0.00205934	0.0144093
	Zfp36	60min	0.0217175	0.0208328	0.0121956	0.0120904	0.016709	0.00305129	0.0209526
	Zfp36	360min	0.0272047	0.0249901	0.0143034	0.0187106	0.0213022	0.00340163	0.00819225
