# Supplementary material for: A high-resolution map of transcriptional repression
Source: eLife. 2017 Mar 20;6:e22767. doi: 10.7554/eLife.22767 (PMC5373822; doi:10.7554/eLife.22767)
Supplement: Figure 3—figure supplement 1—source data 1. — DOI: http://dx.doi.org/10.7554/eLife.22767.014 [file elife-22767-fig3-figsupp1-data1.xlsx]

## Sheet: Figure S3A
Figure S3A: ChIP-qPCR for acetylated histone H3 and H4 with or without TSA treatment for 1 hour
Data from 3 biological replicates
Acetyl-histone H3
		Gene	Treatment	Replicate 1	Replicate 2	Replicate 3	Average	SEM	Student T test
		Igll1	Control	0.389582	0.662044	0.494828	0.515485	0.0793283
		Igll1	4-OHT	0.15932	0.192776	0.216885	0.18966	0.0166903	0.0233723
		Igll1	TSA	0.243164	0.288172	0.393654	0.30833	0.0445967
		Igll1	TSA+4-OHT	0.298334	0.337978	0.316439	0.317584	0.0114585	0.425225
		Myc	Control	0.25349	0.435275	0.377618	0.355461	0.0536336
		Myc	4-OHT	0.194791	0.174343	0.277392	0.215509	0.0314998	0.075646
		Myc	TSA	0.287175	0.260616	0.404721	0.317504	0.0442773
		Myc	TSA+4-OHT	0.282241	0.278355	0.274523	0.278373	0.00222798	0.242281
Acetyl-histone H4
		Gene	Treatment	Replicate 1	Replicate 2	Replicate 3	Average	SEM	Student T test
		Igll1	Control	3.11666	4.50023	4.12673	3.91454	0.413255
		Igll1	4-OHT	1.69349	2.2974	2.5403	2.17706	0.251749	0.00908134
		Igll1	TSA	2.97935	3.75809	4.59479	3.77741	0.466437
		Igll1	TSA+4-OHT	2.97935	3.06312	3.5186	3.18702	0.167541	0.100892
		Myc	Control	1.38992	1.6644	1.89868	1.651	0.147021
		Myc	4-OHT	1.22264	1.18509	1.55294	1.32022	0.116861	0.0336121
		Myc	TSA	2.48802	2.10672	3.2154	2.60338	0.325205
		Myc	TSA+4-OHT	2.52275	2.62079	2.21914	2.45423	0.120903	0.384833

## Sheet: Figure S3B
Figure S3B: ChIP-qPCR for acetylated histone H3 and H4 with or without MS-275 treatment for 1 hour
Data from 3 biological replicates
Acetyl-histone H3
		Gene	Treatment	Replicate 1	Replicate 2	Replicate 3	Average	SEM	Student T test
		Igll1	Control	0.707107	0.820742	0.852635	0.793494	0.0441641
		Igll1	4-OHT	0.229251	0.266093	0.317538	0.27096	0.0256021	0.000969355
		Igll1	MS-275	0.333325	0.493116	0.494828	0.440423	0.0535515
		Igll1	MS-275+4-OHT	0.400535	0.613442	0.262429	0.425469	0.102093	0.452069
Acetyl-histone H4
		Gene	Treatment	Replicate 1	Replicate 2	Replicate 3	Average	SEM	Student T test
		Igll1	Control	7.78124	11.1579	9.22149	9.38689	0.978274
		Igll1	4-OHT	3.5186	3.81055	4.34694	3.89203	0.242568	0.0141045
		Igll1	MS-275	7.78124	6.19026	7.43844	7.13665	0.48343
		Igll1	MS-275+4-OHT	3.75809	7.13543	3.10588	4.66646	1.24876	0.142716

## Sheet: Figure S3C
Figure S3C: ChIP-qPCR for acetylated histone H3 and H4
Data from 3 biological replicates
Acetyl-histone H3
		Gene	Primer	Time	Replicate 1	Replicate 2	Replicate 3	Average	SEM	Student T test
		Igll1	Promoter	0min	1	1	1	1	0
		Igll1	Promoter	5min	0.843816	1.13288	1.48968	1.15546	0.186786	0.2464
		Igll1	Promoter	15min	0.815072	1.16878	1.54756	1.17714	0.211494	0.24521
		Igll1	Promoter	30min	0.755236	1.00696	1.12896	0.963719	0.110031	0.386465
		Igll1	Promoter	1h	0.486327	0.792784	1.21841	0.832507	0.212265	0.256377
		Igll1	Promoter	6h	0.469761	0.750019	1.05702	0.758933	0.169585	0.145538
		Igll1	TSS	0min	1	1	1	1	0
		Igll1	TSS	5min	0.668964	1.43893	1.04972	1.05254	0.222276	0.417576
		Igll1	TSS	15min	0.662044	1.11342	0.933033	0.902833	0.131173	0.268003
		Igll1	TSS	30min	0.389582	0.870551	0.82645	0.695528	0.153502	0.0928828
		Igll1	TSS	1h	0.316439	1	0.678302	0.664914	0.197441	0.115881
		Igll1	TSS	6h	0.25349	0.752623	0.742262	0.582792	0.164678	0.0634143
		Igll1	Downstream	0min	1	1	1	1	0
		Igll1	Downstream	5min	0.823591	1.35191	0.91067	1.02872	0.163537	0.438375
		Igll1	Downstream	15min	0.739694	0.907519	0.604997	0.750737	0.087505	0.0521551
		Igll1	Downstream	30min	0.479632	0.697372	0.550953	0.575985	0.0640901	0.0110461
		Igll1	Downstream	1h	0.373712	0.747425	0.463294	0.528144	0.112649	0.0262715
		Igll1	Downstream	6h	0.295248	0.474671	0.34151	0.370476	0.0537818	0.00360988
		Myc	Promoter	0min	1	1	1	1	0
		Myc	Promoter	5min	0.760489	0.989657	1.03886	0.929668	0.0857737	0.249204
		Myc	Promoter	15min	0.752623	0.939523	0.790041	0.827396	0.0570946	0.047105
		Myc	Promoter	30min	0.615572	0.734584	0.632878	0.661012	0.037124	0.00589091
		Myc	Promoter	1h	0.707107	0.702222	0.692555	0.700628	0.00427579	0.000101964
		Myc	Promoter	6h	0.694959	0.920188	0.773782	0.79631	0.0659863	0.0454344
		Myc	Downstream	0min	1	1	1	1	0
		Myc	Downstream	5min	0.898132	1.14076	0.91067	0.983189	0.0788706	0.425481
		Myc	Downstream	15min	1.39959	0.965936	0.933033	1.09952	0.150334	0.288028
		Myc	Downstream	30min	0.488016	0.707107	0.742262	0.645795	0.0795395	0.0234533
		Myc	Downstream	1h	0.482968	0.752623	0.835088	0.690226	0.106328	0.0501943
		Myc	Downstream	6h	0.586417	0.787308	0.812252	0.728659	0.0714845	0.0314627
Acetyl-histone H4
		Gene	Primer	Time	Replicate 1	Replicate 2	Replicate 3	Average	SEM	Student T test
		Igll1	Promoter	0min	1	1	1	1	0
		Igll1	Promoter	5min	0.90125	1.25266	1.11342	1.08911	0.10217	0.237535
		Igll1	Promoter	15min	0.864537	0.96929	0.917004	0.916944	0.0302395	0.0554659
		Igll1	Promoter	30min	0.600818	0.972655	0.867539	0.813671	0.110668	0.117138
		Igll1	Promoter	1h	0.558644	0.773782	0.91067	0.747699	0.102455	0.0664129
		Igll1	Promoter	6h	0.628507	1.08673	1.01748	0.910907	0.142609	0.297958
		Igll1	TSS	0min	1	1	1	1	0
		Igll1	TSS	5min	0.798298	1.39474	1.25266	1.14857	0.179874	0.247836
		Igll1	TSS	15min	0.690159	0.962594	0.852635	0.835129	0.079131	0.086299
		Igll1	TSS	30min	0.421908	0.936272	0.913831	0.757337	0.16784	0.142564
		Igll1	TSS	1h	0.473029	0.837987	0.697372	0.669463	0.106275	0.044843
		Igll1	TSS	6h	0.436786	0.858565	0.750019	0.68179	0.126446	0.0641121
		Igll1	Downstream	0min	1	1	1	1	0
		Igll1	Downstream	5min	1.01045	1.28788	1.31951	1.20595	0.0981732	0.0854111
		Igll1	Downstream	15min	0.962594	0.864537	0.82932	0.885484	0.0398732	0.0514333
		Igll1	Downstream	30min	0.432269	0.737135	0.955945	0.70845	0.151851	0.0974216
		Igll1	Downstream	1h	0.668964	0.697372	0.823591	0.729976	0.0475207	0.0148015
		Igll1	Downstream	6h	0.535887	0.773782	0.80107	0.70358	0.0842157	0.0360487
		Myc	Promoter	0min	1	1	1	1	0
		Myc	Promoter	5min	0.732043	1.20164	1.22264	1.05211	0.160147	0.387894
		Myc	Promoter	15min	0.949342	1.10957	0.861546	0.973486	0.0726087	0.374995
		Myc	Promoter	30min	0.552865	1.15269	0.885768	0.863773	0.173502	0.2573
		Myc	Promoter	1h	0.662044	1.05702	0.936272	0.885112	0.116853	0.214588
		Myc	Promoter	6h	0.488016	1.18099	1.03526	0.901424	0.210942	0.343123
		Myc	Downstream	0min	1	1	1	1	0
		Myc	Downstream	5min	0.870551	1.26138	1.10191	1.07794	0.113456	0.281524
		Myc	Downstream	15min	1.42899	1.20164	0.820742	1.15046	0.177442	0.242887
		Myc	Downstream	30min	0.65293	1.10957	0.739694	0.834064	0.140011	0.178846
		Myc	Downstream	1h	0.65293	0.986233	0.849685	0.829616	0.0967381	0.110125
		Myc	Downstream	6h	0.694959	1.25701	0.959264	0.970412	0.162347	0.436093

## Sheet: Figure S3D
Figure S3D: ChIP-qPCR for acetylated histone H3 and H4 with or without TSA treatment for 24 hours
Data from 3 biological replicates
Acetyl-histone H3
		Gene	Treatment	Replicate 1	Replicate 2	Replicate 3	Average	SEM	Student T test
		Igll1	Control	0.891929	0.430773	0.76313	0.695277	0.137379
		Igll1	4-OHT	0.167241	0.17374	0.168989	0.16999	0.00194167	0.031849
		Igll1	TSA	0.815072	0.815072	0.590496	0.740214	0.0748587
		Igll1	TSA+4-OHT	0.349896	0.377618	0.438303	0.388606	0.0261054	0.0361345
		Myc	Control	1.43893	1.34257	1.26138	1.34763	0.0513183
		Myc	4-OHT	0.602904	0.547147	0.776469	0.642173	0.06905	0.0119153
		Myc	TSA	1.26576	1.61328	1.22688	1.36864	0.122835
		Myc	TSA+4-OHT	0.837987	1.01748	1.21419	1.02322	0.10864	0.0922106
Acetyl-histone H4
		Gene	Treatment	Replicate 1	Replicate 2	Replicate 3	Average	SEM	Student T test
		Igll1	Control	0.972655	0.524858	0.650671	0.716061	0.133338
		Igll1	4-OHT	0.556711	0.545254	0.442884	0.514949	0.0361843	0.12577
		Igll1	TSA	1.01396	0.895025	0.78187	0.896951	0.0670055
		Igll1	TSA+4-OHT	0.843816	0.852635	0.885768	0.860739	0.0127704	0.346133
		Myc	Control	0.353553	0.358489	0.35233	0.354791	0.00188242
		Myc	4-OHT	0.265172	0.231647	0.279322	0.258714	0.0141363	0.0133306
		Myc	TSA	0.461691	0.450625	0.442884	0.451733	0.00545743
		Myc	TSA+4-OHT	0.530344	0.515842	0.539614	0.5286	0.00691772	0.0082235
