# Supplementary material for: A high-resolution map of transcriptional repression
Source: eLife. 2017 Mar 20;6:e22767. doi: 10.7554/eLife.22767 (PMC5373822; doi:10.7554/eLife.22767)
Supplement: Figure 3—source data 1. — DOI: http://dx.doi.org/10.7554/eLife.22767.012 [file elife-22767-fig3-data1.xlsx]

## Sheet: Figure 3B
Figure 3B: RNAP2 ChIP-qPCR, TFIIB ChIP-qPCR and MNase-qPCR
Data from 3 biological replicates
RNAP2 ChIP-qPCR
	Gene	Treatment	Replicate 1	Replicate 2	Replicate 3	Average	SEM	Student T test
	Rex1	DMSO	0.0746832	0.0396078	0.107092	0.0737945	0.0194862
	Rex1	Triptolide	0.0759887	0.0458139	0.136024	0.085942	0.0265126	0.442977
	Igll1	DMSO	2.22982	1.87505	0.937524	1.6808	0.38549
	Igll1	Triptolide	0.236011	0.133224	0.260062	0.209766	0.0388955	0.00481765
	Myc	DMSO	1.28514	2.44008	1.06579	1.59701	0.426266
	Myc	Triptolide	0.113986	0.107464	0.148335	0.123262	0.0126771	0.0468222
TFIIB ChIP-qPCR
	Gene	Treatment	Replicate 1	Replicate 2	Replicate 3	Average	SEM	Student T test
	Rex1	DMSO	0.0487642	0.0630189	0.0492726	0.0536852	0.00466915
	Rex1	Triptolide	0.0322841	0.0479252	0.0458139	0.0420077	0.00489988	0.137115
	Igll1	DMSO	1.16632	1.04748	0.788361	1.00072	0.111585
	Igll1	Triptolide	0.445027	0.391458	0.280666	0.372384	0.0483959	0.00441935
	Myc	DMSO	0.688709	0.743254	0.748424	0.726796	0.019102
	Myc	Triptolide	0.184535	0.183892	0.142786	0.170404	0.0138103	0.00131021
MNase-qPCR
	Gene	Treatment	Replicate 1	Replicate 2	Replicate 3	Average	SEM	Student T test
	Rex1	DMSO	1.00347	0.870551	0.946058	0.940027	0.0384893
	Rex1	Triptolide	0.96929	0.812252	0.926588	0.90271	0.0468786	0.0809719
	Igll1	DMSO	0.0326902	0.0374212	0.0219445	0.0306853	0.00457883
	Igll1	Triptolide	0.0426888	0.0597466	0.0486978	0.0503777	0.0049953	0.0591074
	Myc	DMSO	0.0667541	0.0695889	0.0492067	0.0618499	0.00637432
	Myc	Triptolide	0.0505901	0.0418102	0.0396922	0.0440309	0.00333614	0.079195

## Sheet: Figure 3C
Figure 3B: RNAP2 ChIP-qPCR, TFIIB ChIP-qPCR and MNase-qPCR with 4-OHT present in the last hour
Data from 3 biological replicates
RNAP2 ChIP-qPCR
	Gene	Treatment	Replicate 1	Replicate 2	Replicate 3	Average	SEM
	Rex1	DMSO	0.04534	0.0378629	0.0985451	0.0605827	0.0191036
	Rex1	Triptolide	0.157883	0.055627	0.114382	0.109297	0.0296281
	Igll1	DMSO	0.216423	0.24097	0.175182	0.210859	0.0191942
	Igll1	Triptolide	0.180733	0.0731463	0.112028	0.121969	0.0314527
	Myc	DMSO	0.540336	0.780207	0.512964	0.611169	0.0848875
	Myc	Triptolide	0.202631	0.0641204	0.110485	0.125746	0.0407061
TFIIB ChIP-qPCR
	Gene	Treatment	Replicate 1	Replicate 2	Replicate 3	Average	SEM
	Rex1	DMSO	0.029914	0.0428943	0.0524442	0.0417508	0.00652899
	Rex1	Triptolide	0.0659248	0.0684848	0.0558201	0.0634099	0.0038662
	Igll1	DMSO	0.268309	0.255594	0.275845	0.266583	0.00590912
	Igll1	Triptolide	0.250341	0.225614	0.127797	0.201251	0.037414
	Myc	DMSO	0.422483	0.402463	0.432847	0.419264	0.00891745
	Myc	Triptolide	0.34555	0.256482	0.204749	0.268927	0.0411193
MNase-qPCR
	Gene	Treatment	Replicate 1	Replicate 2	Replicate 3	Average	SEM	Student T test
	Rex1	DMSO	1.04972	1.01045	0.898132	0.9861	0.045421
	Rex1	Triptolide	0.90125	0.91067	1.16878	0.993566	0.0876479	0.123285
	Igll1	DMSO	0.469761	0.526681	0.486327	0.494256	0.0169027
	Igll1	Triptolide	0.49827	0.494828	0.496546	0.496548	0.000993564	0.964773
	Myc	DMSO	0.156583	0.224533	0.169576	0.183564	0.0208251
	Myc	Triptolide	0.190782	0.198196	0.232451	0.207143	0.0128337	0.917778
