# Supplementary material for: A high-resolution map of transcriptional repression
Source: eLife. 2017 Mar 20;6:e22767. doi: 10.7554/eLife.22767 (PMC5373822; doi:10.7554/eLife.22767)
Supplement: Figure 4—source data 1. — DOI: http://dx.doi.org/10.7554/eLife.22767.016 [file elife-22767-fig4-data1.xlsx]

## Sheet: Figure 4B
Figure 4B: MNase-qPCR for control and Chd4 knockdown cells
Data from 3 biological replicates
		Gene	Time	Cells	Replicate 1	Replicate 2	Replicate 3	Average	SEM	Student T test
		Igll1	0min	Control	1	1	1	1	0
		Igll1	5min	Control	1.45397	1.70527	1.91853	1.69259	0.116269
		Igll1	15min	Control	4.19887	3.75809	6.63456	4.86384	0.774621
		Igll1	30min	Control	6.27667	6.65759	7.49018	6.80815	0.310302
		Igll1	120min	Control	6.27667	7.38706	9.71356	7.79243	0.876968
		Igll1	0min	sh-Chd4	1	1	1	1	0	NA
		Igll1	5min	sh-Chd4	1.37078	0.96929	0.917004	1.08569	0.124138	0.0780596
		Igll1	15min	sh-Chd4	2.44528	1.77154	2.17347	2.1301	0.16948	0.0437231
		Igll1	30min	sh-Chd4	3.77114	2.44528	3.12748	3.11463	0.331511	0.0125145
		Igll1	120min	sh-Chd4	2.64818	3.26029	3.19319	3.03389	0.167857	0.0167148
		Myc	0min	Control	1	1	1	1	0
		Myc	5min	Control	0.835088	1.04972	1.02811	0.970973	0.0590872
		Myc	15min	Control	1.04247	1.09429	1.28343	1.14006	0.0634163
		Myc	30min	Control	1.5966	1.58008	1.46409	1.54692	0.0361059
		Myc	120min	Control	2.44528	2.64818	2.28945	2.46097	0.0899393
		Myc	0min	sh-Chd4	1	1	1	1	0	NA
		Myc	5min	sh-Chd4	0.952638	0.976032	0.852635	0.927102	0.0378408	0.330156
		Myc	15min	sh-Chd4	0.952638	0.976032	0.97942	0.969363	0.00841969	0.0630758
		Myc	30min	sh-Chd4	1.17691	1.06437	1.04247	1.09458	0.0416458	0.00243624
		Myc	120min	sh-Chd4	1.3566	1.51047	1.35191	1.40633	0.0520893	0.00162321

## Sheet: Figure 4C
Figure 4C: RNAP2 ChIP-qPCR, relative gene expression for control and Chd4 knockdown cells
RNAP2 ChIP-qPCR
Data from 3 biological replicates
	Gene	Time	Cells	Replicate 1	Replicate 2	Replicate 3	Average	SEM	Student T test
	Igll1	0min	Control	1	1	1	1	0
	Igll1	5min	Control	1.08673	0.750019	1.02811	0.954956	0.103856	0.353398
	Igll1	15min	Control	0.244855	0.505226	0.400535	0.383539	0.0756414	0.00736211
	Igll1	30min	Control	0.281265	0.403321	0.337978	0.340854	0.035264	0.00142498
	Igll1	120min	Control	0.284204	0.545254	0.436786	0.422082	0.0757164	0.00836771
	Igll1	0min	sh-Chd4	1	1	1	1	0
	Igll1	5min	sh-Chd4	1.34257	0.690159	1.40444	1.14573	0.228483	0.294442
	Igll1	15min	sh-Chd4	0.812252	0.760489	1.12506	0.899267	0.11388	0.234856
	Igll1	30min	sh-Chd4	0.447513	0.377618	1.06069	0.628606	0.216981	0.114547
	Igll1	120min	sh-Chd4	1.64148	0.270744	0.436786	0.783004	0.431907	0.332619
	Myc	0min	Control	1	1	1	1	0
	Myc	5min	Control	1.32409	0.879649	1.08298	1.09557	0.128453	0.267202
	Myc	15min	Control	0.549046	0.646176	0.45376	0.549661	0.0555468	0.00743761
	Myc	30min	Control	0.622006	0.560583	0.389582	0.524057	0.069536	0.0103428
	Myc	120min	Control	0.438303	0.570382	0.49141	0.500032	0.0383708	0.00291925
	Myc	0min	sh-Chd4	1	1	1	1	0
	Myc	5min	sh-Chd4	1.24833	0.885768	1.27899	1.13769	0.126274	0.19469
	Myc	15min	sh-Chd4	1.07923	1.12117	1.34723	1.18254	0.0832307	0.0797851
	Myc	30min	sh-Chd4	0.547147	0.747425	1.32409	0.872887	0.232891	0.319971
	Myc	120min	sh-Chd4	1.71119	0.404721	0.574349	0.896753	0.410152	0.412378
Primary transcripts
Data from 5 biological replicates
	Gene	Time	Cells	Replicate 1	Replicate 2	Replicate 3	Replicate 4	Replicate 5	Average	SEM	Student T test
	Igll1	0min	Control	1	1	1	1	1	1	0
	Igll1	5min	Control	0.898132	1.11342	0.760489	0.97942	0.929805	0.936254	0.0572886	0.164094
	Igll1	15min	Control	0.556711	0.404721	0.385553	0.855595	0.721965	0.584909	0.0908463	0.00513366
	Igll1	30min	Control		0.476319	0.284204	0.514057	0.524858	0.44986	0.0502579	0.0011322
	Igll1	120min	Control	0.213899	0.272627	0.192776	0.426317	0.372419	0.295608	0.0451463	4.92665e-05
	Igll1	0min	sh-Chd4	1	1	1	1	1	1	0
	Igll1	5min	sh-Chd4	0.898132	0.790041	1.08673	0.904379	1.49485	1.03483	0.124486	0.396763
	Igll1	15min	sh-Chd4	0.779165	0.628507	0.898132	0.680657	1.20581	0.838454	0.102714	0.095438
	Igll1	30min	sh-Chd4		0.340329	0.664343	0.795536	1.03526	0.708868	0.129576	0.0690186
	Igll1	120min	sh-Chd4	0.393654	0.390935	0.436786	0.823591	0.692555	0.547504	0.0887992	0.00350173
	Myc	0min	Control	1	1	1	1	1	1	0
	Myc	5min	Control	0.809442	1.30586	0.876606	0.895025	1.19334	1.01605	0.0980302	0.43893
	Myc	15min	Control	0.714497	0.699793	0.598739	1.06069	0.99654	0.814051	0.0904038	0.0544194
	Myc	30min	Control		0.716978	0.539614	0.550953	0.823591	0.657784	0.0613041	0.00772611
	Myc	120min	Control	0.429283	0.301452	0.266093	0.331022	0.458502	0.35727	0.0371158	3.26325e-05
	Myc	0min	sh-Chd4	1	1	1	1	1	1	0
	Myc	5min	sh-Chd4	0.898132	0.815072	1.54756	0.913831	1.57462	1.14984	0.168782	0.212406
	Myc	15min	sh-Chd4	1.00696	0.891929	1.51047	0.776469	1.29684	1.09653	0.13487	0.256853
	Myc	30min	sh-Chd4		0.550953	1.04972	1.02101	1.26138	0.970765	0.134029	0.428891
	Myc	120min	sh-Chd4	0.558644	0.564482	0.592546	0.959264	0.549046	0.644797	0.0789496	0.00541493

## Sheet: Figure 4D
Figure 4D: ChIP-qPCR for CHD4, MBD3, BRG1
CHD4 ChIP-qPCR
Data from 5 biological replicates
	Gene	Time	Replicate 1	Replicate 2	Replicate 3	Replicate 4	Replicate 5	Average	SEM	Student T Test
	Igll1	0min	0	0	0	0	0	0	0
	Igll1	5min	0.975	1.305	1.36	2.145	1.685	1.48333	0.229017	0.00518545
	Igll1	15min	1.27	1.205	1.17	2.57	1.645	1.63417	0.31673	0.0172909
	Igll1	30min	1.32	1.135	1.47	2.025	1.235	1.34083	0.226564	0.00308612
	Igll1	60min	0.99	0.29	0.92	1.375	0.935	0.883333	0.202959	0.0066447
	Igll1	120min	0.83	0.295	-0.07	1.275	0.3	0.4725	0.282717	0.0583958
BRG1 ChIP-qPCR
Data from 5 biological replicates
	Gene	Time	Replicate 1	Replicate 2	Replicate 3	Replicate 4	Replicate 5	Average	SEM	Student T Test
	Igll1	0min	0	0	0	0	0	0	0
	Igll1	5min	-0.445	-0.23	0.635	-0.22	-0.33	-0.118	0.248635	0.398847
	Igll1	15min	-0.41	-0.08	0.355	-0.49	-0.13	-0.151	0.148916	0.183967
	Igll1	30min	0.01	-0.25	-0.17	-0.81	-0.655	-0.375	0.198641	0.0297823
	Igll1	60min	-1.23	-0.785	-0.435	-1.17	-0.655	-0.855	0.196034	0.000898636
	Igll1	120min	-1.18	-1.06	-0.575	-1.975	-1.275	-1.213	0.29098	0.000605023
MBD3 ChIP-qPCR
Data from 3 biological replicates
	Gene	Time	Replicate 1	Replicate 2	Replicate 3	Average	SEM	Student T Test
	Igll1	0min	0	0	0	0	0
	Igll1	5min	1.03	0.92	1.77	1.24	0.266896	0.00599311
	Igll1	15min	1.095	0.315	2.3	1.23667	0.577382	0.0195152
	Igll1	30min	0.77	0.385	1.905	1.02	0.456244	0.0212151
	Igll1	60min	0.275	0.2	1.025	0.5	0.263391	0.0487505
	Igll1	120min	0.075	-0.105	0.955	0.308333	0.327482	0.473661
