# Supplementary material for: A high-resolution map of transcriptional repression
Source: eLife. 2017 Mar 20;6:e22767. doi: 10.7554/eLife.22767 (PMC5373822; doi:10.7554/eLife.22767)
Supplement: Figure 5—source data 1. — DOI: http://dx.doi.org/10.7554/eLife.22767.019 [file elife-22767-fig5-data1.xlsx]

## Sheet: Figure 5A
Figure 5A: MNase-qPCR, RNAP2 ChIP-qPCR and relative gene expression with or without TSA treatment
Data from 3 biological replicates
MNase-qPCR
	Gene	Treatment	Replicate 1	Replicate 2	Replicate 3	Average	SER	Student T Test
	Igll1	Contr.	0.0330318	0.0269233	0.0326902	0.0308818	0.00198168
	Igll1	4-OHT	0.598739	0.541488	0.517632	0.55262	0.0240661
	Igll1	TSA	0.0250334	0.0269233	0.0392817	0.0304128	0.00446786	0.460815
	Igll1	TSA+4-OHT	0.49141	0.477973	0.566442	0.511942	0.0275249	0.236956
	Myc	Contr.	0.25437	0.223756	0.242322	0.24015	0.00890393
	Myc	4-OHT	0.809442	0.671286	0.734584	0.738438	0.0399287
	Myc	TSA	0.18621	0.228458	0.238159	0.217609	0.0159475	0.214814
	Myc	TSA+4-OHT	0.694959	0.867539	0.760489	0.774329	0.0502977	0.364074
RNAP2 ChIP-qPCR
	Gene	Treatment	Replicate 1	Replicate 2	Replicate 3	Average	SER	Student T Test
	Igll1	Contr.	1.42595	1.49685	1.34904	1.42395	0.0426818
	Igll1	4-OHT	0.287559	0.271106	0.203335	0.254	0.0257739
	Igll1	TSA	0.953912	1.09197	0.893121	0.979666	0.0588282	0.00103464
	Igll1	TSA+4-OHT	0.278728	0.351581	0.23357	0.28796	0.034378	0.159684
	Myc	Contr.	2.0166	2.03768	2.0166	2.02363	0.00702548
	Myc	4-OHT	0.905589	0.924617	0.780207	0.870138	0.0452997
	Myc	TSA	1.49167	1.57672	1.95467	1.67436	0.142294	0.0687091
	Myc	TSA+4-OHT	0.751023	0.788361	0.766803	0.768729	0.0108216	0.0746791
Gene expression
	Gene	Treatment	Replicate 1	Replicate 2	Replicate 3	Average	SER	Student T Test
	Igll1	Contr.	0.137262	0.0850821	0.091823	0.104722	0.0163856
	Igll1	4-OHT	0.00396078	0.00342424	0.00230663	0.00323055	0.000487235
	Igll1	TSA	0.0534747	0.0676859	0.0557455	0.0589687	0.00440763	0.0733327
	Igll1	TSA+4-OHT	0.00229069	0.00325078	0.00242971	0.00265706	0.000299558	0.204999
	Myc	Contr.	0.103665	0.0758872	0.0733022	0.0842848	0.00971878
	Myc	4-OHT	0.0457527	0.0322401	0.0278728	0.0352885	0.00538183
	Myc	TSA	0.0571145	0.0788361	0.059954	0.0653015	0.00681675	0.161144
	Myc	TSA+4-OHT	0.0309268	0.0240137	0.0220971	0.0256792	0.0026815	0.0353994

## Sheet: Figure 5B
Figure 5B: Relative gene expression with or without MS-275 treatment
Data from 3 biological replicates
	Gene	Treatment	Replicate 1	Replicate 2	Replicate 3	Average	SER	Student T Test
	Igll1	Contr.	0.15932	0.07966	0.145592	0.128191	0.0245868
	Igll1	4-OHT	0.00458139	0.00373416	0.00381262	0.00404272	0.000270282
	Igll1	MS-275	0.109576	0.0810525	0.116629	0.102419	0.0108756	0.112376
	Igll1	MS-275+4-OHT	0.00721392	0.0061722	0.00806002	0.00714872	0.000545943	0.0162194
	Myc	Contr.	0.0788361	0.0463914	0.0924617	0.0725631	0.0136642
	Myc	4-OHT	0.0228763	0.0324643	0.0213444	0.0255617	0.00347955
	Myc	MS-275	0.0842021	0.0693481	0.0761506	0.0765669	0.00429303	0.379048
	Myc	MS-275+4-OHT	0.0272047	0.0226397	0.0320174	0.0272873	0.00270742	0.401284

## Sheet: Figure 5C
Figure 5C: Relative gene expression with or without TSA treatment in primary pre-B cells
Data from 3 biological replicates
	Gene	Treatment	Cells	Replicate 1	Replicate 2	Replicate 3	Average	SER	Student T Test
	YWHAZ	Contr.	Control	1	1	1	1	0
	YWHAZ	TSA	Control	1	1	1	1	0	NA
	YWHAZ	Contr.	Ikaros	1.17283	1.00347	1.02101	1.06577	0.0537699
	YWHAZ	TSA	Ikaros	0.812252	1.08673	1.07923	0.992738	0.0902691	0.331164
	Igll1	Contr.	Control	1	1	1	1	0
	Igll1	TSA	Control	1	1	1	1	0	NA
	Igll1	Contr.	Ikaros	0.678302	0.607097	0.512278	0.599226	0.0480883
	Igll1	TSA	Ikaros	0.702222	0.541488	0.389582	0.544431	0.0902634	0.16387
	Myc	Contr.	Control	1	1	1	1	0
	Myc	TSA	Control	1	1	1	1	0	NA
	Myc	Contr.	Ikaros	0.209497	0.694959	0.524858	0.476438	0.142217
	Myc	TSA	Ikaros	ND	0.408951	0.524858	0.466905	0.047319	0.25
				ND = not detected

## Sheet: Figure 5D
Figure 5D: MNase-qPCR and relative gene expression with or without TSA treatment in split TEV cells
Data from 3 biological replicates
MNase-qPCR
	Gene	Treatment	Replicate 1	Replicate 2	Replicate 3	Average	SER	Student T Test
	Igll1	Contr.	0.0169215	0.0188407	0.0225614	0.0194412	0.00165555
	Igll1	Rapamycin	0.433769	0.311003	0.314253	0.353009	0.0403913
	Igll1	TSA	0.0214928	0.020546	0.0165732	0.0195374	0.00150705	0.48922
	Igll1	TSA+Rapamycin	0.303549	0.393654	0.386891	0.361365	0.0289738	0.457553
	Myc	Contr.	0.231647	0.194117	0.219151	0.214972	0.0110336
	Myc	Rapamycin	0.45376	0.369847	0.386891	0.403499	0.0256073
	Myc	TSA	0.191445	0.157127	0.124568	0.157713	0.019308	0.0460146
	Myc	TSA+Rapamycin	0.367292	0.286181	0.336808	0.330094	0.0236542	0.0122164
Gene expression
	Gene	Treatment	Replicate 1	Replicate 2	Replicate 3	Average	SER	Student T Test
	Igll1	Contr.	1	1	1	1	0
	Igll1	Rapamycin	0.406126	0.539614	0.336808	0.427516	0.0595138
	Igll1	TSA	1	1	1	1	0	NA
	Igll1	TSA+Rapamycin	0.404721	0.417544	0.420448	0.414238	0.00483162	0.422291
	Myc	Contr.	1	1	1	1	0
	Myc	Rapamycin	0.449066	0.532185	0.436786	0.472679	0.0299634
	Myc	TSA	1	1	1	1	0	NA
	Myc	TSA+Rapamycin	0.342696	0.494828	0.366021	0.401182	0.0473049	0.0348265
