# Supplementary material for: A high-resolution map of transcriptional repression
Source: eLife. 2017 Mar 20;6:e22767. doi: 10.7554/eLife.22767 (PMC5373822; doi:10.7554/eLife.22767)
Supplement: Figure 6—source data 1. — DOI: http://dx.doi.org/10.7554/eLife.22767.022 [file elife-22767-fig6-data1.xlsx]

## Sheet: Figure 6A
Figure 6A: Gene expression after 24 hours of TSA treatment
Data from 3 biological replicates
		Gene	Treatment	Replicate 1	Replicate 2	Replicate 3	Average	SEM	Student T Test
		Igll1	Contr.	0.0911888	0.0492067	0.0649287	0.0684414	0.0122458
		Igll1	4-OHT	0.00854917	0.00684848	0.00975258	0.00838341	0.000842428
		Igll1	TSA	0.0899333	0.0631532	0.0597466	0.0709444	0.00954528	0.354823
		Igll1	TSA+4-OHT	0.0175182	0.0105618	0.0239306	0.0173369	0.0038603	0.0487392
		Myc	Contr.	0.0799366	0.0581128	0.0715453	0.0698649	0.00635576
		Myc	4-OHT	0.0200535	0.0193034	0.0270168	0.0221246	0.00245567
		Myc	TSA	0.101884	0.0813339	0.0693481	0.0841887	0.00950017	0.112679
		Myc	TSA+4-OHT	0.049549	0.0387409	0.0672184	0.0518361	0.00829991	0.0191923

## Sheet: Figure 6B
Figure 6B: MNase-qPCR after 24 hours of TSA treatment with short or long amplicons
Data from 3 biological replicates
Short amplicons
		Primer	Treatment	Replicate 1	Replicate 2	Replicate 3	Average	SEM	Student T Test
		Promoter	Contr.	0.0384733	0.0667541	0.058517	0.0545815	0.00839777
		Promoter	4-OHT	0.843816	0.904379	0.82932	0.859172	0.022988
		Promoter	TSA	0.0425411	0.0502407	0.040386	0.0443893	0.00299112	0.28986
		Promoter	TSA+4-OHT	0.855595	0.784584	0.657471	0.765884	0.0579527	0.229887
		TSS	Contr.	0.0542212	0.072544	0.066293	0.0643527	0.00537758
		TSS	4-OHT	0.771105	0.680657	0.726986	0.72625	0.0261128
		TSS	TSA	0.072293	0.0561333	0.0595399	0.0626554	0.00491813	0.883928
		TSS	TSA+4-OHT	0.702222	0.650671	0.694959	0.682617	0.0161103	0.0746391
Long amplicons
		Primer	Treatment	Replicate 1	Replicate 2	Replicate 3	Average	SEM	Student T Test
		Promoter	Contr.	0.0825365	0.0789456	0.0894623	0.0836482	0.00308637
		Promoter	4-OHT	0.623929	0.618368	0.560858	0.601052	0.0201607
		Promoter	TSA	0.080675	0.0993788	0.0696257	0.0832265	0.0086832	0.974409
		Promoter	TSA+4-OHT	0.416544	0.472445	0.428133	0.439041	0.0170338	0.0195726
		TSS	Contr.	0.0351324	0.0433125	0.0462308	0.0415585	0.00332168
		TSS	4-OHT	0.317487	0.391006	0.382664	0.363719	0.0232413
		TSS	TSA	0.0341161	0.0305114	0.0361232	0.0335836	0.00164174	0.154755
		TSS	TSA+4-OHT	0.184356	0.23952	0.268738	0.230872	0.0247398	0.00659643

## Sheet: Figure 6C
Figure 6C: Histone H2B ChIP-qPCR
Data from 3 biological replicates
		Primer	Treatment	Replicate 1	Replicate 2	Replicate 3	Average	SEM	Student T Test
		Promoter	Contr.	1	1	1	1	0
		Promoter	4-OHT	1.20581	1.28343	1.09429	1.19451	0.0548893	0.0356148
		Promoter	TSA	1.02101	1.19748	0.873573	1.03069	0.0936286
		Promoter	TSA+4-OHT	1.11342	1.10191	1.09809	1.10447	0.00460758	0.255104
		TSS	Contr.	1	1	1	1	0
		TSS	4-OHT	1.10573	1.15669	1.18921	1.15054	0.0242927	0.0125325
		TSS	TSA	0.926588	1.03886	0.870551	0.945333	0.0494822
		TSS	TSA+4-OHT	0.90125	1.04608	0.895025	0.947453	0.0493485	0.448924

## Sheet: Figure 6D
Figure 6D
Data from three independent biological replicates
			Allele counts				percentage counts
			Repliate 1	Repliate 2	Repliate 3		Repliate 1	Repliate 2	Repliate 3	Average	SEM
	Contrl	Associated	12	12	7		0.0789474	0.118812	0.0686275	0.0887956	0.015301
	Contrl	Not associated	140	89	95		0.921053	0.881188	0.931373	0.911204	0.015301
	Contrl	All alleles	152	101	102
	4-OHT	Associated	83	83	79		0.783019	0.783019	0.77451	0.780183	0.00283635
	4-OHT	Not associated	23	23	23		0.216981	0.216981	0.22549	0.219817	0.00283635
	4-OHT	All alleles	106	106	102
	4-OHT+TSA	Associated	28	35	40		0.4375	0.426829	0.392157	0.418829	0.0136871
	4-OHT+TSA	Not associated	36	47	62		0.5625	0.573171	0.607843	0.581171	0.0136871
	4-OHT+TSA	All alleles	64	82	102
