# Supplementary material for: A high-resolution map of transcriptional repression
Source: eLife. 2017 Mar 20;6:e22767. doi: 10.7554/eLife.22767 (PMC5373822; doi:10.7554/eLife.22767)
Supplement: Figure 7—source data 1. — DOI: http://dx.doi.org/10.7554/eLife.22767.024 [file elife-22767-fig7-data1.xlsx]

## Sheet: Figure 7A
Figure 7A
Data from three independent biological replicates
			Allele counts				percentage counts
			Repliate 1	Repliate 2	Repliate 3		Repliate 1	Repliate 2	Repliate 3	Average	SEM
	Contrl	Associated	12	12	7		0.0789474	0.118812	0.0686275	0.0887956	0.015301
	Contrl	Not associated	140	89	95		0.921053	0.881188	0.931373	0.911204	0.015301
	Contrl	All alleles	152	101	102
	4-OHT	Associated	83	83	79		0.783019	0.783019	0.77451	0.780183	0.00283635
	4-OHT	Not associated	23	23	23		0.216981	0.216981	0.22549	0.219817	0.00283635
	4-OHT	All alleles	106	106	102
	4-OHT+shChd4	Associated	14	29	31		0.132075	0.273585	0.298077	0.234579	0.0517372
	4-OHT+shChd4	Not associated	92	77	73		0.867925	0.726415	0.701923	0.765421	0.0517372
	4-OHT+shChd4	All alleles	106	106	104

## Sheet: Figure 7B
Figure 7B: Ikaros and EBF ChIP-qPCR in control and sh-Chd4 cells
Data from 3 biological replicates
Control cells
	Antibody	Time	Replicate 1	Replicate 2	Replicate 3	Average	SEM	Student T test	Student T test for control vs sh-Chd4 cells at 15min, 30min and 2h
	EBF	0min	0	0	0	0	0
	EBF	5min	-0.0460849	-0.0174797	0.182098	0.0395111	0.07177	0.275745
	EBF	15min	-0.536875	-0.840375	-0.156688	-0.511313	0.197777	0.0520321
	EBF	30min	-0.664397	-0.741101	-0.596597	-0.667365	0.0417412	0.00860498
	EBF	2h	-1.04202	-0.675974	-1.83825	-1.18542	0.343094	0.0178442
	Ikaros	0min	0	0	0	0	0
	Ikaros	5min	1.64818	1.65737	1.9897	1.76508	0.112339	0.030882
	Ikaros	15min	2.78423	1.47084	4.81589	3.02365	0.973026	0.00144807
	Ikaros	30min	2.5186	1.56685	5.08392	3.05645	1.0503	0.000182766
	Ikaros	2h	2.43426	1.96905	3.3319	2.5784	0.399969	0.012952
sh-Chd4 cells
	EBF	0min	0	0	0	0	0
	EBF	5min	-0.547565	-0.0104514	0.0171794	-0.180279	0.183816	0.220555
	EBF	15min	-0.101905	0.0701951	0.433558	0.133949	0.157828	0.220421
	EBF	30min	-0.231144	0.0103433	0.047362	-0.057813	0.0873221	0.324379
	EBF	2h	-2.04196	-0.156688	0.212692	-0.661985	0.698177	0.314376	0.00295478
	Ikaros	0min	0	0	0	0	0
	Ikaros	5min	-0.672402	3.16986	2.11666	1.53804	1.14628	0.361955
	Ikaros	15min	1.75108	8.15779	9.05611	6.32166	2.29995	0.0010459
	Ikaros	30min	1.77984	8.61309	8.31787	6.23693	2.23018	0.00308306
	Ikaros	2h	0.972465	5.49802	12.2232	6.23123	3.26843	0.033539	0.0142404
Figure 7B %input
Data from 3 independent biological replicates
	Gene	time	shRNA	antibody	Replicate 1	Replicate 2	Replicate 3	Average	SEM
	Rex1	0min	control	EBF	0.0130205	0.0255936	0.0271468	0.0219203	0.00447244
	Rex1	5min	control	EBF	0.0267731	0.00771525	0.0353273	0.0232719	0.00816089
	Rex1	15min	control	EBF	0.0265882	0.021822	0.0159194	0.0214432	0.00308563
	Rex1	30min	control	EBF	0.0494436	0.02022	0.024213	0.0312922	0.0091486
	Rex1	120min	control	EBF	0.0291963	0.0408627	0.0229865	0.0310151	0.00523995
	Igll1	0min	control	EBF	0.437371	0.658351	0.642571	0.579431	0.071176
	Igll1	5min	control	EBF	0.418102	0.647041	0.785633	0.616925	0.10716
	Igll1	15min	control	EBF	0.284584	0.357726	0.555527	0.399279	0.0809267
	Igll1	30min	control	EBF	0.26278	0.378123	0.402463	0.347789	0.0430812
	Igll1	120min	control	EBF	0.214185	0.392817	0.226397	0.2778	0.0576165
	Rex1	0min	sh-Chd4	EBF	0.00859032	0.0183501	0.033076	0.0200055	0.0071167
	Rex1	5min	sh-Chd4	EBF	0.0102157	0.000698684	0.0201501	0.0103548	0.00561556
	Rex1	15min	sh-Chd4	EBF	0.00956465	0.00908013	0.0328475	0.0171641	0.00784296
	Rex1	30min	sh-Chd4	EBF	0.00391147	0.0149049	0.0338882	0.0175682	0.00875541
	Rex1	120min	sh-Chd4	EBF	0.0105759	0.00266237	0.0270529	0.0134304	0.00718414
	Igll1	0min	sh-Chd4	EBF	0.379436	0.360214	0.443476	0.394375	0.0251695
	Igll1	5min	sh-Chd4	EBF	0.245183	0.356489	0.451228	0.350966	0.0595442
	Igll1	15min	sh-Chd4	EBF	0.344345	0.387409	0.782915	0.50489	0.139567
	Igll1	30min	sh-Chd4	EBF	0.308198	0.363979	0.465524	0.379234	0.0460523
	Igll1	120min	sh-Chd4	EBF	0.124734	0.311419	0.563282	0.333145	0.127063
	Rex1	0min	control	Ikaros	0.0526263	0.0820091	0.0381262	0.0575872	0.0129085
	Rex1	5min	control	Ikaros	0.0511872	0.0328475	0.033076	0.0390369	0.00607552
	Rex1	15min	control	Ikaros	0.066152	0.0381262	0.0491021	0.0511268	0.00815342
	Rex1	30min	control	Ikaros	0.0497875	0.0663816	0.0612956	0.0591549	0.00490843
	Rex1	120min	control	Ikaros	0.0645664	0.110103	0.0179102	0.0641933	0.0266145
	Igll1	0min	control	Ikaros	0.658351	1.03665	0.340784	0.678595	0.201134
	Igll1	5min	control	Ikaros	1.74343	2.75476	1.01884	1.83901	0.503391
	Igll1	15min	control	Ikaros	2.49135	2.56139	1.98196	2.3449	0.182593
	Igll1	30min	control	Ikaros	2.31647	2.66093	2.0733	2.35023	0.170471
	Igll1	120min	control	Ikaros	2.26095	3.07786	1.47624	2.27168	0.462379
	Rex1	0min	sh-Chd4	Ikaros	0.024551	0.0246363	0.033306	0.0274978	0.00290423
	Rex1	5min	sh-Chd4	Ikaros	0.0125335	0.0255051	0.0368275	0.0249554	0.00701848
	Rex1	15min	sh-Chd4	Ikaros	0.0863852	0.064343	0.0757258	0.0754847	0.00636416
	Rex1	30min	sh-Chd4	Ikaros	0.0373416	0.0391981	0.0228277	0.0331225	0.00517522
	Rex1	120min	sh-Chd4	Ikaros	0.033306	0.0220501	0.0922651	0.0492071	0.0217728
	Igll1	0min	sh-Chd4	Ikaros	1.71943	0.426888	0.340784	0.829033	0.445891
	Igll1	5min	sh-Chd4	Ikaros	0.563282	1.78006	1.06211	1.13515	0.353148
	Igll1	15min	sh-Chd4	Ikaros	4.73029	3.90935	3.42696	4.0222	0.380447
	Igll1	30min	sh-Chd4	Ikaros	4.77973	4.10371	3.17538	4.0196	0.465041
	Igll1	120min	sh-Chd4	Ikaros	3.39151	2.77392	4.50625	3.55723	0.506898
