# Supplementary material for: A high-resolution map of transcriptional repression
Source: eLife. 2017 Mar 20;6:e22767. doi: 10.7554/eLife.22767 (PMC5373822; doi:10.7554/eLife.22767)
Supplement: Table 1—source data 1. — DOI: http://dx.doi.org/10.7554/eLife.22767.010 [file elife-22767-table1-data1.xlsx]

## Sheet: Sheet1
Row.names	WholeGenelog2FoldChange	WholeGenepvalue	WholeGenepadj	TSSlog2FoldChange	TSSpvalue	TSSpadj	JustGenelog2FoldChange	JustGenepvalue	JustGenepadj	Travellinglog2FoldChange	Travellingpvalue	Travellingpadj	T0.6_logFC	T0.6_pval	T0.6_adjp
Igll1	-3.07046	3.19246e-92	4.44677e-88	-3.7949	6.98677e-95	6.80721e-91	-2.75025	1.16926e-57	1.62867e-53	0.695526	0.429606	0.860321	-3.58365	7.58e-13	6.91e-10
Itga5	-2.46474	1.08743e-68	7.57338e-65	-3.78953	6.11802e-54	8.51541e-51	-2.29905	1.80499e-49	1.25709e-45	1.34533	0.00310041	0.0964024	-5.38965	6.47e-09	9.3e-07
Gfra2	-2.17993	1.37675e-61	6.39227e-58	-3.41083	1.10403e-81	5.37831e-78	-2.06147	3.57439e-46	1.65959e-42	1.15444	0.00835713	0.171102	-1.9041	7.45e-07	4.36e-05
Vpreb2	-2.11226	9.61929e-23	4.46624e-20	-2.59719	5.70601e-27	1.09007e-24	-1.70055	4.39316e-10	NA	0.302594	0.631058	0.93052	-2.46586	2.3e-06	9.68e-05
Gpr97	-1.96044	2.60865e-45	9.08397e-42	-2.16178	9.71135e-26	1.60369e-23	-1.86584	4.87665e-31	1.13211e-27	0.132801	0.744097	0.959207	-1.73626	2.76e-08	3.15e-06
Mrgpra1	-1.9413	4.28927e-19	1.17148e-16	-2.58401	3.57033e-07	NA	-1.92727	4.03021e-18	3.11871e-15	0.638728	0.587901	0.91535	-3.57161	0.00013528	0.00252036
Tifab	-1.87361	1.53684e-34	3.32577e-31	-1.84706	1.60476e-28	3.63609e-26	-1.93995	6.4451e-27	1.12217e-23	-0.391971	0.440891	0.863725	-2.1977	3.24e-08	3.54e-06
Ptgs1	-1.79192	2.50066e-34	4.35397e-31	-2.23442	1.96352e-45	1.59421e-42	-1.71757	1.20753e-24	1.86885e-21	0.284469	0.488904	0.885137	-2.621	2.21e-10	7.04e-08
Serpinf1	-1.77504	1.15064e-26	7.63206e-24	-2.30531	0.000418186	NA	-1.68095	4.56176e-19	3.73769e-16	1.42629	0.0702039	0.479909	-2.76524	2.11e-09	3.74e-07
Gstt3	-1.76807	8.10818e-22	2.97207e-19	-2.02088	2.96514e-20	2.83229e-18	-1.53604	5.4063e-11	NA	0.0689011	0.908426	0.988248	-0.801247	0.000798863	0.00952812
Spn	-1.76027	1.51553e-22	6.80963e-20	-2.3199	5.3108e-30	1.29358e-27	-1.51519	6.75387e-13	1.77499e-10	0.556518	0.124966	0.606156	-1.96004	0.000179046	0.00313012
Ccnd2	-1.75112	1.05888e-42	2.94983e-39	-1.71665	3.68242e-62	5.97964e-59	-1.74388	9.69295e-32	2.70026e-28	-0.211901	0.498839	0.886875	-2.60894	1.66e-10	5.88e-08
Pde2a	-1.73397	5.72428e-33	7.97335e-30	0.0078947	0.983972	0.990274	-1.65369	1.70721e-23	2.16179e-20	-1.87653	1.15327e-06	0.000345638	-1.63809	1.5e-06	7.38e-05
Hoxb8	-1.71332	2.54979e-22	1.07624e-19	-2.12421	0.000565759	NA	-1.19788	5.48773e-09	6.70514e-07	1.4466	0.0530108	0.433882	-2.87026	2.83e-05	0.000743884
Hoxb8	-1.71332	2.54979e-22	1.07624e-19	-2.12421	0.000565759	NA	-1.19788	5.48773e-09	6.70514e-07	1.4466	0.0530108	0.433882	-2.87026	2.83e-05	0.000743884
Il12a	-1.69627	1.67136e-34	3.32577e-31	-1.99718	1.83226e-11	6.09274e-10	-1.59773	2.96367e-23	3.44007e-20	0.270223	0.623055	0.929152	-1.81651	2.03e-06	8.92e-05
Tnnt2	-1.65374	2.44196e-24	1.30823e-21	-1.64263	2.60586e-20	2.52236e-18	-1.65395	1.63767e-17	1.08624e-14	-0.360286	0.572158	0.909838	-1.51701	1.74e-06	8.1e-05
Gpr56	-1.62991	2.72959e-24	1.40816e-21	-1.56491	1.42432e-07	2.20272e-06	-1.53585	1.55659e-16	8.03027e-14	-0.174336	0.714803	0.951444	-1.39186	0.000724979	0.00887074
Slc22a8	-1.62986	1.20778e-26	7.64689e-24	-2.27597	2.08049e-17	1.4376e-15	-1.49704	8.03081e-20	7.45741e-17	0.59565	0.350148	0.821208	-1.76437	1.94e-05	0.000555681
Ramp1	-1.59706	9.55393e-28	6.65383e-25	-2.58671	1.44294e-40	7.81032e-38	-1.46222	4.05675e-20	4.03618e-17	0.976906	0.000285647	0.021177	-2.2038	3.42e-08	3.67e-06
Gfi1b	-1.5802	2.69037e-21	9.36854e-19	-2.03854	1.19058e-24	1.81247e-22	-1.44583	1.4997e-15	6.29693e-13	0.368556	0.479808	0.882012	-1.739	2.5e-09	4.25e-07
Pax7	-1.5311	7.01177e-26	4.06946e-23	-1.55645	3.02398e-24	4.39741e-22	-1.43777	9.48217e-17	5.28309e-14	-0.0651177	0.818762	0.974413	-1.52689	0.000428633	0.00599804
Thbd	-1.50801	4.16391e-14	6.98784e-12	-2.95295	7.13164e-80	2.31612e-76	-0.926892	2.53552e-05	0.00112985	1.82547	4.08335e-06	0.00094292	-2.27248	1.9e-08	2.22e-06
Cdk6	-1.49936	3.59476e-28	2.78175e-25	-1.19564	1.59742e-17	1.11969e-15	-1.45917	1.01435e-23	1.41289e-20	-0.456456	0.152777	0.65353	-1.91745	8.44e-09	1.17e-06
Vpreb1	-1.49335	2.93489e-22	1.13556e-19	0.307027	0.0491127	0.115219	-2.53598	1.67485e-40	5.83226e-37	-3.1218	4.1276e-14	2.90707e-10	-2.14311	2.25e-06	9.6e-05
Sit1	-1.49287	1.2946e-15	2.73219e-13	-1.10364	4.20157e-05	0.000331734	-1.55141	3.93999e-14	1.40718e-11	-0.743828	0.0708065	0.482059	-0.975913	0.00049747	0.00672942
Cst7	-1.4653	6.41853e-18	1.59649e-15	-2.113	1.17647e-30	3.0164e-28	-1.22557	9.498e-11	1.59395e-08	0.606296	0.296782	0.791948	-1.95754	1.73e-07	1.44e-05
Ass1	-1.46085	1.99106e-21	7.11114e-19	-2.19306	7.04601e-37	2.86039e-34	-1.3059	1.13243e-13	3.66827e-11	0.729361	0.00664071	0.151612	-0.830625	2.96e-05	0.000769215
Trim16	-1.4476	2.81788e-22	1.12591e-19	-2.22168	5.71705e-33	1.68792e-30	-1.18236	1.01375e-13	3.44404e-11	0.818157	0.0784899	0.504909	-1.88535	4.16e-06	0.000160536
Retsat	-1.44389	6.86609e-21	2.17359e-18	-2.30203	2.44989e-74	5.96733e-71	-0.511265	0.00196038	0.035929	1.66482	5.0687e-05	0.00618594	-1.25257	2.17e-09	3.8e-07
Slc35e4	-1.42743	4.268e-19	1.17148e-16	-3.01659	2.52783e-29	5.86397e-27	-1.16316	3.37366e-11	6.26557e-09	1.7773	7.17763e-08	3.61086e-05	-2.80511	1.48e-09	3.07e-07
Angptl2	-1.40542	3.09424e-19	8.79586e-17	-2.40964	7.67624e-32	2.19969e-29	-1.23659	1.5199e-13	4.81151e-11	1.03566	0.00045948	0.0281401	-2.92499	1.57e-10	5.74e-08
Tyms	-1.39339	1.99341e-22	8.67694e-20	-1.99369	4.82382e-50	5.22205e-47	-1.08278	3.28782e-11	6.18866e-09	0.760927	0.0469303	0.412326	-1.33402	1.63e-06	7.75e-05
Hoxb7	-1.37544	5.38419e-16	1.19042e-13	-0.576543	0.00326535	0.013055	-1.2948	1.25505e-11	2.57083e-09	-0.942393	0.00742914	0.16098	-2.02952	0.00278905	0.0235877
Xkr7	-1.35896	2.82913e-22	1.12591e-19	-0.18805	0.662426	NA	-1.29296	8.64319e-16	3.88358e-13	-1.26739	0.00516204	0.131487	-3.44464	1.63e-06	7.75e-05
Gna15	-1.3516	3.11861e-21	1.05949e-18	-1.46584	3.6839e-24	5.27827e-22	-1.3099	3.0979e-15	1.23288e-12	-0.0114314	0.964752	0.99947	-2.04829	1.37e-12	1.16e-09
Lfng	-1.34856	1.28827e-19	3.90095e-17	-1.85973	4.4146e-46	3.91013e-43	-0.897924	7.04134e-07	4.95348e-05	0.723023	0.10004	0.555548	-1.97824	1.12e-05	0.000355571
Tmem119	-1.34019	7.08518e-13	1.06118e-10	-1.48736	1.29361e-23	1.65837e-21	-1.4011	4.94869e-12	1.13001e-09	-0.140508	0.654763	0.936029	-1.63467	0.000180389	0.00314069
Nrxn2	-1.29055	3.69698e-21	1.22608e-18	0.313769	0.174616	0.301112	-1.21676	1.0858e-13	3.60096e-11	-1.81091	1.58933e-07	6.65506e-05	-1.72176	1.84e-07	1.5e-05
Smtn	-1.2849	4.60241e-21	1.49086e-18	0.0216632	0.967587	NA	-1.19498	4.23769e-13	1.15739e-10	-1.36184	0.00210447	0.0778048	-1.12633	0.000151756	0.00275101
Gm10384	-1.28423	2.86292e-17	6.75892e-15	-0.989573	1.39387e-07	2.1625e-06	-1.41542	1.45377e-15	6.29693e-13	-0.672247	0.161168	0.664003	-2.0932	7.24e-08	7e-06
Prtn3	-1.27523	1.45109e-17	3.48486e-15	-0.307079	0.253435	0.396853	-1.35582	1.53705e-15	6.29693e-13	-1.22183	0.000397401	0.0261579	-2.08963	1.43e-05	0.000435478
1700048O20Rik	-1.26659	8.51133e-15	1.59034e-12	-2.03465	1.4515e-30	3.62615e-28	-0.523751	0.0255105	NA	1.34063	0.0136966	0.220174	-1.06427	0.00010553	0.00205301
Runx1	-1.2657	5.06483e-24	2.51957e-21	-0.771794	0.000321534	0.00189178	-1.19106	2.17929e-16	1.08412e-13	-0.504348	0.294484	0.791037	-1.92484	1.84e-09	3.36e-07
Ier3	-1.26414	2.69809e-14	4.63972e-12	-1.45199	7.45217e-37	2.90426e-34	-1.05157	3.05324e-06	NA	0.179267	0.457586	0.873542	-1.48864	0.000233062	0.00384282
Tuba8	-1.26192	1.07363e-13	1.73891e-11	-1.63548	1.44179e-18	1.14206e-16	-1.26949	4.09267e-11	7.40348e-09	0.172904	0.682672	0.944279	-3.7096	2.78e-09	4.6e-07
Vamp5	-1.25598	1.79679e-14	3.16803e-12	-0.929399	5.23219e-10	1.35218e-08	-1.76241	1.18074e-17	8.50759e-15	-1.20477	0.00222921	0.0803653	-2.91554	1.18e-11	6.87e-09
Hes3	-1.22273	4.6962e-15	9.48021e-13	-2.20927	2.82448e-05	NA	-1.12748	1.51386e-10	2.45192e-08	1.39197	0.0385355	0.373837	-2.3656	7.65e-05	0.00158644
Ppp1r18	-1.21881	6.74762e-18	1.6489e-15	-1.26983	4.17016e-26	7.25534e-24	-1.1397	6.24884e-12	1.40387e-09	-0.0282189	0.887433	0.982982	-0.866523	4.52e-05	0.00106536
Slc16a13	-1.20898	2.20052e-13	3.44393e-11	-1.65845	9.02795e-23	1.05975e-20	-0.567844	0.0100862	NA	0.970248	0.0131683	0.215287	-1.02488	1.52e-05	0.000455389
Tnfsf11	-1.19437	6.75554e-13	1.0228e-10	-2.14243	3.65796e-16	2.14696e-14	-1.04437	4.3628e-09	5.6268e-07	0.942227	0.00579208	0.139944	-3.44119	0.000204438	0.00345268
Colq	-1.19266	6.35538e-18	1.59649e-15	-0.199576	0.771274	NA	-1.1187	2.3892e-13	6.93317e-11	-1.00238	0.167138	0.670279	-1.62602	3.35e-07	2.29e-05
2900026A02Rik	-1.17409	8.56312e-15	1.59034e-12	-0.462137	0.0439031	0.105435	-1.09537	7.35963e-10	1.05683e-07	-0.774277	0.0111641	0.198696	-2.47015	1.26e-06	6.53e-05
Lamb1	-1.15616	4.1707e-16	9.36995e-14	-0.174204	0.769284	NA	-1.09991	2.14559e-13	6.64133e-11	-0.93414	0.0626913	0.462919	-5.21741	2.87e-08	3.24e-06
Tal1	-1.15551	2.43756e-12	3.42957e-10	-0.183633	0.752685	NA	-1.08325	7.08315e-09	8.29086e-07	-1.10321	0.0299234	0.330541	-3.70237	7.8e-12	4.98e-09
Rtn4rl2	-1.1456	3.96188e-12	5.46386e-10	-1.43049	1.69861e-05	0.000150862	-1.10325	2.3052e-10	3.64877e-08	0.230639	0.544783	0.902137	-3.14167	2.69e-11	1.32e-08
Ttll9	-1.13434	1.7807e-12	2.55705e-10	-0.628207	0.150656	NA	-1.07127	6.93065e-10	1.01618e-07	-0.429345	0.42164	0.856166	-3.21486	6.32e-07	3.84e-05
Slco4a1	-1.13054	7.09954e-15	1.37347e-12	-0.946687	7.58803e-16	4.34883e-14	-1.283	2.22597e-13	6.74032e-11	-0.517207	0.0726975	0.488708	-2.02368	1.89e-14	6.13e-11
Tnfsf9	-1.12357	1.32167e-08	9.74047e-07	-1.70373	3.43671e-18	2.59565e-16	-0.357447	0.123743	NA	1.22645	8.08306e-05	0.00825058	-2.32577	5.47e-08	5.49e-06
Tmtc3	-1.11843	4.9469e-12	6.75543e-10	-2.86236	3.20273e-45	2.40032e-42	-0.140127	0.525516	0.83819	2.72976	1.91943e-13	5.72438e-10	-1.74321	3.68e-08	3.85e-06
Anks1	-1.11734	9.15239e-15	1.67742e-12	0.467458	0.00329659	0.013158	-1.15874	2.5789e-12	6.19335e-10	-1.84975	9.37073e-10	1.09997e-06	-2.81423	3.52e-17	4.49e-13
Ndrg1	-1.11269	7.78926e-16	1.69526e-13	-0.721661	1.44359e-10	4.23641e-09	-1.37323	4.92408e-16	2.28625e-13	-0.864191	0.000613587	0.0336303	-1.56281	2.25e-06	9.6e-05
Hoxb5	-1.10893	6.83918e-11	8.50562e-09	-1.4209	0.00384485	NA	-1.02025	4.42848e-08	4.31359e-06	0.496457	0.40098	0.847084	-1.99891	3.92e-06	0.000153485
Ephb4	-1.10651	1.31204e-14	2.37343e-12	-0.660444	0.0966608	NA	-1.04975	8.72926e-11	1.4828e-08	-0.594667	0.112355	0.579296	-2.59237	1.84e-08	2.19e-06
Tbx19	-1.09044	5.56094e-11	7.10628e-09	-1.44835	5.56318e-05	0.000423784	-1.00653	7.40959e-09	8.60068e-07	0.346276	0.51246	0.893677	-2.88738	1.07e-09	2.44e-07
Irf4	-1.08427	2.56352e-09	2.27435e-07	-1.8049	2.93734e-11	9.57142e-10	-0.83962	3.35534e-05	0.00141626	0.849645	0.0160594	0.239379	-4.03604	6.88e-08	6.71e-06
Myc	-1.08186	5.5502e-12	7.5057e-10	-1.31521	5.84108e-41	3.55685e-38	-0.932624	4.01981e-07	3.07648e-05	0.213468	0.40481	0.847365	-1.1836	3.24e-05	0.000824515
Socs2	-1.07933	1.2156e-16	2.82202e-14	-1.48537	5.28109e-22	5.71707e-20	-0.992909	1.48408e-10	2.43197e-08	0.360092	0.0549577	0.439156	-1.14347	0.00235536	0.0208455
Cd93	-1.07272	5.44529e-09	4.40974e-07	-1.41631	1.66422e-06	1.9944e-05	-0.9619	2.67363e-08	2.67921e-06	0.217941	0.711817	0.951204	-1.91566	1.46e-08	1.8e-06
Igfbp4	-1.05243	2.05707e-09	1.84857e-07	-1.65612	3.07846e-09	6.86349e-08	-0.935048	2.36412e-06	0.000144429	0.556521	0.186825	0.691985	-2.34041	0.000303904	0.00467279
BC034090	-1.05172	4.62278e-10	4.60352e-08	-0.722021	0.0636587	NA	-0.965757	8.25035e-07	5.60581e-05	-0.321026	0.448205	0.867441	-0.891435	0.000332166	0.00494068
Nucb1	-1.04544	7.38954e-11	9.02885e-09	-1.58748	7.43059e-23	8.93781e-21	-0.765247	2.58986e-05	0.00114521	0.675995	0.0115086	0.201863	-0.759223	9.33e-07	5.18e-05
Tac4	-1.04396	2.44253e-10	2.6789e-08	-2.25941	1.00336e-18	8.14644e-17	-0.735148	1.80497e-05	0.00084937	1.4496	0.0120662	0.206518	-2.07194	1.79e-06	8.26e-05
Spry4	-1.04241	1.14499e-13	1.83317e-11	-1.02186	6.80958e-16	3.92578e-14	-1.08837	2.80196e-11	5.42063e-09	-0.231791	0.242183	0.747784	-1.88024	8.97e-06	0.000300338
Inpp5d	-1.0405	8.06739e-16	1.72878e-13	-0.912669	7.15809e-09	1.46824e-07	-0.987676	2.84537e-12	6.71749e-10	-0.196522	0.653654	0.936029	-0.722949	0.000196609	0.00335445
Rgl1	-1.03663	5.24627e-15	1.04393e-12	-0.952913	1.41914e-07	2.1982e-06	-0.985999	8.19037e-12	1.75513e-09	-0.153325	0.629469	0.93001	-1.76608	1.62e-09	3.16e-07
Cln6	-1.03538	2.15767e-12	3.06676e-10	-1.80976	5.28332e-27	1.05052e-24	-0.813808	2.01076e-06	0.00012789	0.833328	0.0112722	0.199724	-1.112	1.1e-06	5.89e-05
1700109H08Rik	-1.03253	2.95658e-07	1.55993e-05	-0.63817	0.315722	0.464174	-1.01346	3.28639e-07	2.55732e-05	0.119853	0.917902	0.990112	-1.81946	3.77e-05	0.00092464
Prx	-1.02683	4.62699e-10	4.60352e-08	-0.244719	0.72012	NA	-0.954349	9.06048e-08	8.24859e-06	-0.85905	0.252732	0.760287	-2.9912	1.57e-06	7.57e-05
Chchd10	-1.02191	1.97858e-10	2.20478e-08	-0.852283	1.38432e-13	6.27324e-12	-0.980701	1.56551e-07	1.36287e-05	-0.300026	0.34087	0.815148	-0.674891	0.0020057	0.0183489
Tmem69	-1.02147	3.92149e-10	4.0763e-08	-1.61607	3.1333e-16	1.85017e-14	-0.239128	0.324765	NA	1.29375	0.0266543	0.313138	-0.928417	0.00183231	0.0171437
Il10ra	-1.01829	2.82874e-09	2.47809e-07	-1.41694	2.56475e-08	4.71479e-07	-0.909562	7.10022e-07	4.96979e-05	0.373225	0.331745	0.809629	-1.64461	0.00163772	0.0157384
Tars2	-1.01673	7.70082e-12	1.02157e-09	-1.45507	7.28137e-27	1.36428e-24	-0.807115	7.53149e-07	5.1887e-05	0.515881	0.12862	0.613111	-1.2263	7.19e-09	1.01e-06
Emp1	-1.0127	1.76361e-12	2.55705e-10	-2.20757	4.15567e-20	3.85606e-18	-0.799215	1.56083e-07	1.36287e-05	1.35318	0.00733285	0.159645	-1.5428	4.45e-06	0.000170956
Bcl11a	-1.00928	1.44381e-14	2.57832e-12	-1.26679	2.50305e-10	6.98775e-09	-0.919364	5.53963e-09	6.70969e-07	0.238957	0.404426	0.847365	-1.68902	5.52e-10	1.42e-07
Ptpn6	-1.00225	1.51072e-11	1.96662e-09	-0.854488	2.27004e-05	0.000192489	-0.924005	1.20251e-07	1.06011e-05	-0.234357	0.501989	0.887775	-1.15454	1.74e-07	1.44e-05
Ctu1	-0.993852	3.22792e-10	3.43219e-08	-1.66093	3.09448e-14	1.49255e-12	-0.543177	0.00284231	0.0461967	0.955721	0.0864773	0.525278	-0.680457	0.00310418	0.0256119
Lef1	-0.992296	1.01863e-13	1.66923e-11	-1.9664	2.40248e-16	1.4449e-14	-0.894302	1.40143e-08	1.52504e-06	0.956992	0.00195299	0.0741529	-1.33226	0.00469172	0.0340203
Lmo2	-0.985937	1.88949e-11	2.43692e-09	0.697564	0.254321	NA	-0.915469	5.16013e-08	4.95693e-06	-1.99527	0.000396311	0.0261579	-2.31237	1.96e-10	6.58e-08
9530077C05Rik	-0.979379	3.72115e-13	5.7591e-11	-0.952182	2.87938e-13	1.24683e-11	-1.05693	3.54601e-12	8.23205e-10	-0.26633	0.392333	0.841029	-1.54668	5.65e-07	3.55e-05
Car9	-0.975766	1.71758e-07	9.76495e-06	-0.183577	0.726027	NA	-0.896051	2.47919e-05	0.00111395	-0.832055	0.113763	0.582624	-0.945478	0.00169029	0.0161463
Vipr2	-0.968081	4.51555e-10	4.55776e-08	-2.56918	7.63188e-67	1.48715e-63	-0.514705	0.00257435	0.0430988	1.93496	6.04809e-10	8.51934e-07	-2.11448	1.09e-10	4.36e-08
Nr1d1	-0.966562	3.26734e-08	2.17755e-06	-2.81313	4.12594e-24	5.74272e-22	-0.556682	0.00564133	0.0742705	2.22934	1.05628e-07	4.95957e-05	-4.78602	1.62e-13	2.3e-10
Lrdd	-0.966439	1.82168e-09	1.64767e-07	-1.18782	1.65071e-20	1.62453e-18	-0.824447	5.97758e-06	0.000329098	0.213898	0.42909	0.860123	-0.499787	0.00591483	0.0400027
Ccnb1	-0.952524	5.02365e-09	4.1405e-07	-1.35226	1.87717e-19	1.65451e-17	-0.756524	2.05503e-05	0.000938767	0.43947	0.270373	0.773452	-1.05102	1.65e-05	0.000484886
Hirip3	-0.952391	1.13925e-09	1.065e-07	-1.23572	8.20221e-22	8.78178e-20	-0.817878	1.76978e-05	0.000838478	0.259758	0.390207	0.840122	-1.00519	0.00148826	0.0147234
Adcy6	-0.947859	1.03915e-10	1.22664e-08	-1.24621	0.00920075	NA	-0.863651	1.69685e-07	1.43245e-05	0.552693	0.292675	0.789883	-1.45601	4.15e-06	0.000160413
BC068157	-0.947025	4.97293e-10	4.91262e-08	-0.710258	0.021063	0.0588013	-0.886638	4.22274e-07	3.16229e-05	-0.349423	0.242552	0.748432	-2.42877	8.66e-05	0.0017521
Zan	-0.946363	1.52606e-09	1.39845e-07	-0.242054	0.728438	NA	-0.875538	1.96371e-07	1.64774e-05	-0.416742	0.677209	0.943315	-2.8845	3.49e-13	3.43e-10
Lzts2	-0.936568	1.54503e-09	1.40659e-07	0.215868	0.59353	NA	-0.925384	3.63183e-08	3.58778e-06	-1.32208	0.000946365	0.0448838	-1.87063	0.00048939	0.00665133
Cacna1b	-0.934874	2.85654e-07	1.51377e-05	-0.642077	0.00385266	0.0149013	-0.938182	6.35708e-07	4.54091e-05	-0.59053	0.127774	0.611212	-3.11947	2.4e-14	6.13e-11
Fgd2	-0.934451	1.9106e-08	1.3509e-06	-1.94682	5.55544e-12	2.02722e-10	-0.766316	3.34289e-05	0.00141529	1.07968	0.00699484	0.155409	-2.76027	1.18e-07	1.05e-05
Nthl1	-0.921842	3.33945e-08	2.21501e-06	-1.20395	5.29187e-18	3.81916e-16	-0.774164	0.000298736	0.00807857	0.261155	0.329256	0.809488	-0.947957	2.66e-05	0.00070947
Rapgef3	-0.916443	3.00258e-10	3.21714e-08	-0.0997662	0.64309	0.757541	-0.921347	2.09285e-08	2.15936e-06	-0.978595	7.81731e-05	0.00821751	-1.11192	3.15e-07	2.19e-05
C1rl	-0.911924	2.93258e-06	0.000116468	-1.9432	9.22754e-06	NA	-0.763329	0.000131419	0.00423736	1.12938	0.0264493	0.312165	-2.00828	0.00256959	0.0222176
Fxyd5	-0.905115	8.7287e-08	5.29179e-06	-1.68365	3.67873e-15	1.99121e-13	-0.707809	0.000194383	0.00587323	0.85281	0.00161983	0.0650054	-1.44205	4.25e-07	2.79e-05
Phlda1	-0.904881	1.97893e-06	8.40381e-05	-1.08448	1.70447e-15	9.48952e-14	-0.898574	1.55312e-05	0.000761739	-0.0385113	0.934056	0.993424	-1.08142	0.0028294	0.0238342
Tk1	-0.902473	1.28304e-08	9.60834e-07	-0.89502	6.17903e-11	1.89363e-09	-0.8524	2.34431e-06	0.000144382	-0.126355	0.696641	0.947272	-0.696425	8.72e-07	4.9e-05
Tnfaip3	-0.900198	5.58824e-10	5.44326e-08	-1.04111	8.55234e-10	2.13109e-08	-0.838843	2.43724e-07	1.99696e-05	0.106479	0.706283	0.949914	-1.83005	5.15e-05	0.0011675
Tgfb3	-0.889024	2.5669e-07	1.38583e-05	-1.93829	8.06876e-13	3.30311e-11	-0.701645	0.00011818	0.00392872	1.1499	0.0142198	0.224077	-1.64129	0.000396431	0.00566778
Hsd17b11	-0.879657	7.57353e-09	5.96069e-07	-1.9823	7.24213e-21	7.20001e-19	-0.503308	0.00269981	0.0446188	1.34962	0.0101686	0.19252	-1.51539	4.81e-09	7.31e-07
Pon3	-0.878063	1.02414e-06	4.61188e-05	-2.22855	1.44354e-31	4.0184e-29	-0.22561	0.292761	0.694224	1.90725	7.90332e-05	0.00824072	-1.02212	4.75e-06	0.00017924
Plcb2	-0.875	1.45841e-07	8.46425e-06	-1.31482	1.32418e-13	6.05703e-12	-0.74843	0.000127655	0.00412554	0.441695	0.284316	0.782813	-1.39817	5.78e-06	0.000207868
Dtx4	-0.874692	4.23389e-09	3.57417e-07	-0.612531	0.0359019	0.0897364	-0.825815	6.44052e-07	4.57704e-05	-0.356071	0.266865	0.771565	-3.18274	1.01e-11	6.13e-09
Pnp2	-0.874276	1.17134e-06	5.14689e-05	-0.893872	0.00283621	0.0116293	-0.836625	2.05016e-05	0.000938767	-0.0774274	0.829842	0.976293	-2.80905	1.15e-08	1.47e-06
Sox15	-0.872422	7.91471e-07	3.73708e-05	-1.3036	2.15255e-14	1.05921e-12	-0.752012	0.00021882	0.00632353	0.388601	0.196145	0.706068	-2.80725	1.59e-06	7.61e-05
Col5a3	-0.868527	1.20521e-07	7.14357e-06	0.675158	0.182276	NA	-0.816625	4.10529e-06	0.000235286	-1.80835	8.37629e-05	0.00842774	-2.01767	0.00110745	0.0119164
Mapkapk2	-0.865258	3.65412e-10	3.82694e-08	-0.793161	2.38285e-05	0.000200484	-0.820743	2.21838e-07	1.83928e-05	-0.160767	0.531076	0.898803	-0.675557	0.00344443	0.0277715
Cnn3	-0.863031	3.26068e-10	3.44076e-08	-0.611605	9.51488e-08	1.52222e-06	-1.05426	8.53522e-12	1.80132e-09	-0.599891	0.00462446	0.123372	-0.695921	0.00528476	0.0369637
Impdh1	-0.855313	5.60435e-09	4.51231e-07	-1.29622	7.36617e-25	1.13918e-22	-0.675439	7.79449e-05	0.00282733	0.495859	0.0311161	0.335864	-1.23177	2.44e-10	7.43e-08
Sema6b	-0.853888	3.97426e-09	3.37545e-07	0.428319	0.454423	NA	-0.787335	3.40078e-06	0.000202433	-1.85945	0.00161241	0.0648928	-3.06026	1.72e-14	6.13e-11
Nrgn	-0.85356	8.21151e-08	5.03868e-06	-1.06974	1.93102e-08	3.6461e-07	-0.761607	4.16996e-05	0.00171092	0.187103	0.633093	0.931132	-2.06979	9.9e-06	0.000324011
Ccnd1	-0.853211	1.411e-08	1.03441e-06	-1.77694	8.71719e-18	6.19939e-16	-0.651375	0.00010752	0.0036175	1.02858	0.000291619	0.0215065	-3.4857	5.78e-11	2.46e-08
Mettl6	-0.847455	4.65973e-09	3.90944e-07	-0.921119	6.47862e-09	1.34587e-07	-0.865012	5.71657e-08	5.44123e-06	-0.100088	0.79848	0.970799	-0.668612	4.61e-05	0.00108584
Il17ra	-0.846554	1.41436e-10	1.64172e-08	-0.625302	2.59464e-08	4.75668e-07	-1.06341	5.88232e-11	1.03715e-08	-0.64672	0.0331996	0.34415	-0.851106	1.01e-06	5.51e-05
Nsg2	-0.839213	1.27024e-07	7.43411e-06	-1.39833	5.76187e-08	9.59622e-07	-0.762088	3.63789e-06	0.000212908	0.54505	0.107261	0.568857	-1.48654	7.33e-05	0.00154076
Tbkbp1	-0.832217	7.15049e-08	4.44639e-06	0.0622471	0.753282	0.838098	-0.867349	2.72317e-06	0.000164203	-1.18359	0.00412452	0.115274	-1.68079	1.48e-06	7.31e-05
Plxnb1	-0.82795	5.33066e-07	2.63301e-05	-1.10428	7.27351e-05	0.000538904	-0.79074	1.70034e-05	0.000818337	0.166536	0.606031	0.922432	-2.44595	2.17e-05	0.00059613
Coro2a	-0.826084	1.42984e-10	1.64597e-08	0.0441252	0.75002	0.835805	-0.85775	1.75387e-09	2.39507e-07	-1.09335	0.000717809	0.0380115	-1.82161	3.09e-06	0.000125218
Slc19a1	-0.824294	8.69304e-08	5.29179e-06	0.195006	0.650465	NA	-0.738136	5.15757e-05	0.00203512	-1.13268	0.00263952	0.0872778	-1.30977	6.83e-06	0.000237471
Iqgap3	-0.823797	1.26332e-07	7.42482e-06	-1.37555	2.15982e-13	9.56506e-12	-0.699103	8.8744e-05	0.00312941	0.549398	0.0608491	0.456821	-0.904775	0.000145261	0.0026559
Ctif	-0.82214	4.44742e-07	2.25266e-05	0.141955	0.812556	NA	-0.752783	1.60474e-05	0.000779347	-1.16368	0.0314417	0.336954	-2.97809	0.00417839	0.0315157
Fzd9	-0.819397	2.75359e-07	1.47518e-05	-1.34958	8.30299e-17	5.35735e-15	-0.338018	0.0788275	0.383784	0.812794	0.077726	0.504101	-3.60763	3.35e-07	2.29e-05
Gem	-0.818938	2.12684e-07	1.17559e-05	-0.522822	0.00136698	0.00636945	-1.19719	2.21335e-09	2.9644e-07	-0.960176	0.0105396	0.195343	-1.80133	0.000835317	0.00985242
Pitpnm1	-0.816633	5.3696e-09	4.37387e-07	-0.858505	2.98095e-10	8.2276e-09	-0.767611	1.13193e-05	0.000581794	-0.0860079	0.757396	0.961752	-0.81692	2.26e-07	1.72e-05
Atp2b4	-0.812909	6.11517e-07	2.95758e-05	-1.8365	5.28677e-18	3.81916e-16	-0.689215	4.94941e-05	0.00197499	1.04767	0.000680616	0.0368737	-2.10651	0.000323629	0.00484191
Timm10	-0.803285	8.17424e-06	0.000278384	-0.954488	1.29748e-06	1.60832e-05	-0.749086	0.000269165	0.00745368	0.0232103	0.955455	0.99656	-1.09652	0.00351737	0.0281434
Itpk1	-0.801466	2.82149e-08	1.92649e-06	-0.0607654	0.707489	0.806112	-0.774695	3.52816e-06	0.000208236	-0.871717	0.00550732	0.136578	-0.875739	2.18e-07	1.68e-05
Ncf2	-0.800428	3.59088e-09	3.08203e-07	-1.70394	2.61479e-20	2.52236e-18	-0.651236	1.34379e-05	0.000678174	0.933277	0.0458345	0.409141	-0.786984	4.17e-05	0.000995526
Skp2	-0.799379	8.60774e-09	6.7358e-07	-1.36813	9.27478e-23	1.07576e-20	-0.601878	0.000138925	0.00445873	0.653845	0.0561265	0.442344	-0.822034	9.4e-05	0.00185943
Acp6	-0.797581	2.85821e-07	1.51377e-05	-0.953657	7.57513e-09	1.5408e-07	-0.69922	2.33882e-05	0.00105771	0.10472	0.7474	0.960175	-0.969199	3.49e-05	0.000871137
Enpp6	-0.797324	1.23035e-05	0.000396704	-0.618317	0.28978	NA	-0.748459	4.33502e-05	0.00176557	-0.0958103	0.86203	0.981654	-3.45899	1.47e-09	3.07e-07
Cd180	-0.794032	2.19028e-07	1.20587e-05	-1.11529	1.19435e-07	1.87383e-06	-0.716009	3.80834e-06	0.00022011	0.245667	0.771974	0.965	-0.933909	0.00183012	0.0171437
Cd163	-0.792566	1.69963e-07	9.70253e-06	0.988498	0.155429	NA	-0.737206	6.2233e-06	0.000341277	-2.60473	0.0011427	0.0507764	-1.71728	0.00173685	0.0164679
Ptpn7	-0.792382	4.51881e-08	2.88727e-06	-1.22102	3.25578e-15	1.78208e-13	-0.626833	0.000190766	0.00577647	0.475877	0.249089	0.756052	-0.591052	8.27e-06	0.000281472
Ppm1f	-0.787627	7.57442e-09	5.96069e-07	-0.384774	0.000371576	0.00213459	-1.0376	1.77599e-10	2.84342e-08	-0.805871	0.0123155	0.208505	-0.973958	0.000123174	0.00234776
Ache	-0.78677	1.17532e-06	5.14811e-05	-0.361659	0.308848	0.457155	-0.70475	0.000207319	0.00610002	-0.472918	0.295215	0.791046	-1.55488	0.00151779	0.0149575
Pold4	-0.781704	1.5921e-05	0.000488465	-0.783836	4.79002e-06	5.06173e-05	-0.92346	1.90246e-06	0.000122117	-0.380044	0.401779	0.847098	-0.696633	0.00201358	0.0184078
Rgs8	-0.781636	7.79649e-07	3.69379e-05	-0.276525	0.522125	NA	-0.741556	4.75622e-06	0.000266062	-0.528594	0.173104	0.676379	-2.36811	8.4e-07	4.81e-05
Sfxn3	-0.781631	1.01513e-06	4.60327e-05	-1.45022	2.62681e-17	1.80232e-15	-0.562905	0.00190226	0.0350947	0.77743	0.00341809	0.102129	-1.10029	2.09e-05	0.000581189
Etv6	-0.778702	1.12998e-09	1.06356e-07	-0.195043	0.102738	0.2037	-0.883867	7.32166e-10	1.05683e-07	-0.835852	0.00129751	0.0560638	-1.61239	3.56e-05	0.00088677
Sema4a	-0.778449	7.46736e-06	0.000258096	-0.435959	0.432534	NA	-0.721764	7.5139e-05	0.00273266	-0.283948	0.565987	0.907746	-2.17457	0.000755126	0.00911026
Card9	-0.777558	1.58802e-06	6.82701e-05	-1.51913	1.98769e-10	5.62966e-09	-0.562701	0.003566	0.0541076	0.795813	0.0728141	0.488708	-0.947499	9.89e-06	0.000324011
Cd300lf	-0.777232	0.00044391	0.00766199	-2.27242	9.1155e-10	2.25412e-08	-0.455146	0.0423011	0.27276	1.88415	0.00443009	0.120468	-1.90137	0.000362446	0.00529581
Oma1	-0.776439	6.45572e-09	5.13838e-07	-1.54022	7.84426e-34	2.38833e-31	-0.4108	0.0188854	0.165339	1.00114	0.00216571	0.0790316	-1.19135	1.52e-05	0.000455389
Clstn3	-0.77589	8.14668e-08	5.02102e-06	0.456084	0.440894	NA	-0.704331	2.35685e-05	0.00106241	-1.3948	0.00770094	0.16386	-1.10568	2.35e-06	9.87e-05
Tnfrsf19	-0.775672	1.31445e-08	9.73885e-07	-0.612443	0.00104911	0.00513127	-0.766643	3.2452e-07	2.53946e-05	-0.308797	0.329924	0.809488	-1.27826	7e-05	0.00148787
St6galnac3	-0.775273	8.54829e-07	3.97309e-05	-0.8249	4.31575e-08	7.48191e-07	-0.736918	5.72547e-06	0.000317729	-0.0921911	0.793543	0.968662	-1.19624	0.00413749	0.0312812
Slc2a9	-0.774814	7.74084e-07	3.67994e-05	-0.30984	0.652229	NA	-0.70993	1.52879e-05	0.000758656	-0.362315	0.713247	0.951212	-2.45792	2.77e-07	2.05e-05
Vamp8	-0.774644	1.51379e-05	0.00046918	-0.933859	3.65178e-08	6.44553e-07	-0.627967	0.0016156	0.0313497	0.1495	0.671126	0.940833	-1.02554	1.89e-06	8.49e-05
Ramp2	-0.774366	2.62596e-06	0.000107264	-1.82149	1.32519e-19	1.20667e-17	-0.0600045	0.752452	0.934941	1.72735	1.21609e-06	0.000356871	-1.48448	0.000755262	0.00911026
Ifnar2	-0.773498	1.87975e-07	1.05153e-05	-1.05246	3.44662e-14	1.65421e-12	-0.864961	5.74242e-08	5.44123e-06	0.0574387	0.800733	0.970843	-1.13668	1.16e-05	0.000364543
Unc93b1	-0.77234	1.4992e-06	6.48519e-05	-0.760739	2.77552e-07	4.04819e-06	-0.81654	4.73827e-06	0.000266062	-0.203088	0.43729	0.862941	-0.794539	0.00113821	0.0121251
1810032O08Rik	-0.769155	1.02856e-06	4.61188e-05	-0.762407	2.25516e-08	4.21728e-07	-0.985104	2.7801e-07	2.2514e-05	-0.396715	0.178458	0.681007	-1.06449	0.00128189	0.0132432
Slc17a9	-0.764995	1.14572e-06	5.05025e-05	-1.26386	1.60841e-24	2.41088e-22	-0.587159	0.00206254	0.0369693	0.552667	0.0820356	0.515096	-1.91589	4.62e-05	0.00108584
Hfe	-0.764848	1.99592e-05	0.000595147	-1.09159	8.3549e-07	1.08307e-05	-0.617646	0.00348713	NA	0.336805	0.325574	0.80601	-3.31148	4.79e-09	7.31e-07
Edaradd	-0.762601	1.31616e-06	5.729e-05	-1.9683	3.37698e-26	5.98217e-24	-0.459753	0.00625503	0.0800793	1.41887	5.17225e-07	0.000177698	-1.58906	4.32e-09	6.8e-07
Polr1b	-0.751682	3.76576e-08	2.46259e-06	-0.950674	2.00495e-15	1.1099e-13	-0.774191	1.36207e-06	9.03442e-05	0.0382842	0.871607	0.982037	-1.30291	2.99e-07	2.18e-05
Trib1	-0.74982	3.05727e-06	0.00011962	-1.25328	7.72111e-20	7.09687e-18	-0.589831	0.00267584	0.0444241	0.508013	0.0647341	0.467852	-1.37024	0.00431032	0.0321243
Fam78a	-0.749479	4.14584e-08	2.66117e-06	-0.959592	7.01681e-05	0.000521471	-0.666021	3.04873e-05	0.00130263	0.211338	0.553587	0.904516	-1.60287	0.00436537	0.0323712
Tcof1	-0.747706	1.33605e-07	7.78654e-06	-0.660266	5.02843e-07	6.84246e-06	-0.782411	8.75968e-06	0.00046393	-0.284187	0.262415	0.769023	-0.555143	0.00616272	0.0413505
Ppard	-0.743835	4.9613e-08	3.15552e-06	-0.219944	0.169342	0.29502	-0.769361	3.76608e-06	0.000218574	-0.76129	0.0368441	0.365566	-0.906372	0.000195103	0.00334216
Itm2c	-0.734381	9.86707e-06	0.000328015	-1.14286	0.00014902	0.00098971	-0.675973	0.000212407	0.00620255	0.381245	0.257754	0.766094	-2.00259	4.82e-06	0.000180278
Kcnn4	-0.729441	2.7594e-06	0.000111086	-1.66363	4.1037e-20	3.84446e-18	-0.461384	0.00943778	0.106617	1.10851	7.15372e-05	0.00769499	-1.32476	2.33e-09	4.02e-07
Plekho2	-0.725833	3.31705e-07	1.72559e-05	-0.347764	0.00435954	0.0164951	-1.28179	3.04097e-16	1.46061e-13	-1.15037	0.00410684	0.115018	-1.64569	4.45e-05	0.00105081
Sp7	-0.722515	3.09983e-05	0.000872274	-1.1276	0.0242234	NA	-0.62439	0.00116804	0.0246136	0.595119	0.222127	0.729945	-2.60731	3.73e-05	0.000917454
Cabp4	-0.722504	0.000117152	0.0025976	-1.27733	4.11222e-05	0.000326	-0.586814	0.00415815	0.0601442	0.592499	0.174029	0.676845	-2.42753	7.33e-11	3.02e-08
Zfp385a	-0.717061	2.58056e-07	1.38782e-05	0.499379	0.180963	0.309646	-0.667053	2.89722e-05	0.00124536	-1.39936	0.000469185	0.0283645	-0.822152	0.0021305	0.0192287
Tmem161a	-0.715177	2.6221e-05	0.000754612	-1.33126	4.74406e-17	3.16585e-15	-0.282542	0.139323	0.514083	0.941551	0.00155348	0.0637228	-0.779402	0.00025673	0.00410575
Pkn3	-0.713988	1.64008e-05	0.000500676	-1.91474	1.72829e-23	2.18685e-21	-0.290574	0.116293	0.469218	1.5507	5.16356e-08	2.79746e-05	-3.05456	1.56e-08	1.88e-06
Lxn	-0.711619	6.97796e-05	0.00170819	-1.36801	4.89496e-10	1.27518e-08	-0.321048	0.112518	0.46123	0.952327	0.00211522	0.0779972	-1.92069	3.09e-07	2.18e-05
Tagap	-0.710162	2.19073e-05	0.000642413	-1.58802	6.76584e-12	2.40583e-10	-0.167964	0.369358	0.749313	1.22901	0.0299659	0.330541	-0.745189	0.00368942	0.0290286
Rsu1	-0.708423	2.64519e-06	0.000107733	-1.65893	1.55883e-19	1.39337e-17	-0.565905	0.0011243	0.0238362	0.952775	0.00988616	0.188694	-0.754548	7.41e-06	0.000255754
Imp4	-0.707073	5.95717e-06	0.000212763	-0.76334	1.0107e-06	1.28387e-05	-0.793368	1.93519e-05	0.000898504	-0.164518	0.662483	0.938145	-0.750474	2.8e-06	0.000115165
Pdcd6	-0.706943	1.04537e-05	0.000345012	-1.10698	3.90804e-17	2.64417e-15	-0.437013	0.0460521	0.285901	0.516096	0.154707	0.6554	-1.1267	8.97e-07	5e-05
Txnrd3	-0.701064	3.16044e-06	0.000123216	-0.889558	2.38709e-09	5.43397e-08	-0.747782	2.0556e-05	0.000938767	-0.0736211	0.817377	0.974158	-1.81873	3.15e-08	3.53e-06
Dusp7	-0.698896	5.15466e-06	0.000187465	-0.619774	2.12443e-05	0.000182204	-0.872646	6.74704e-07	4.77054e-05	-0.483517	0.206713	0.714141	-2.24783	1.07e-07	9.8e-06
Ccdc116	-0.698126	5.44435e-05	0.00139916	-1.12262	7.40321e-15	3.89889e-13	-0.103062	0.625651	0.88666	0.939249	0.000383663	0.0257347	-1.03311	0.00385505	0.0298351
Mybl2	-0.693368	1.84297e-07	1.03511e-05	-0.873737	1.69783e-11	5.68452e-10	-0.641285	5.75085e-05	0.00221281	0.0795113	0.766766	0.964531	-0.565445	7.57e-05	0.00157675
Itgal	-0.692348	6.68156e-06	0.000234427	-0.968392	0.00017894	0.00115534	-0.612655	0.0001801	0.00546538	0.193479	0.661374	0.937567	-0.758991	0.00423017	0.0317562
Gm10101	-0.692152	3.87423e-05	0.00105193	-0.982625	1.08655e-07	1.71624e-06	-0.191625	0.405014	NA	0.767826	0.0891353	0.529748	-1.68505	0.00398432	0.0304661
Rnf25	-0.691639	0.000190981	0.00384419	-1.3474	4.03736e-11	1.28549e-09	-0.312474	0.123757	0.484779	0.915611	0.00576385	0.139565	-1.18247	0.000207027	0.0034856
Eif4ebp1	-0.691129	2.9349e-06	0.000116468	-0.578214	3.12575e-05	0.000256133	-1.00351	3.22081e-09	4.27263e-07	-0.622366	0.0259897	0.30946	-0.789432	0.00280045	0.0236527
Tpm3	-0.687278	3.80268e-07	1.95452e-05	-0.241411	0.713593	NA	-0.602121	0.000237445	0.00673598	-0.252872	0.659684	0.93746	-0.390204	0.00265108	0.0227373
Ccdc86	-0.685415	5.05706e-06	0.000185368	-0.932265	1.52087e-09	3.61411e-08	-0.495652	0.00478233	0.0662817	0.330367	0.185033	0.68879	-0.862074	3.75e-05	0.000920704
Tbc1d4	-0.685187	4.34856e-07	2.21063e-05	-2.12316	3.6536e-34	1.14829e-31	-0.488504	0.000980717	0.0214449	1.56623	9.36394e-12	1.88429e-08	-1.98339	5.71e-08	5.7e-06
Epha2	-0.684279	3.50636e-05	0.000965218	-1.25639	0.00110481	0.00535265	-0.57957	0.00153634	0.0301403	0.650073	0.197808	0.707188	-4.31997	1.66e-09	3.16e-07
Tor3a	-0.683282	3.76673e-06	0.000143745	-0.970928	3.74759e-09	8.15017e-08	-0.62675	0.000228281	0.00653771	0.233849	0.42671	0.858909	-1.55613	9.89e-07	5.44e-05
Pml	-0.683101	9.01187e-07	4.1565e-05	-0.790368	2.07381e-06	2.42267e-05	-0.611101	7.15879e-05	0.00261719	0.0587505	0.892418	0.983932	-0.651072	1.78e-05	0.000518147
Wdr77	-0.683087	2.95598e-06	0.00011664	-0.825765	1.01998e-10	3.05775e-09	-0.688987	0.000200677	0.00597273	-0.0318196	0.927355	0.992649	-0.740747	0.0002136	0.00357269
Hoxb6	-0.681723	1.93358e-06	8.23636e-05	-0.550432	0.00382216	0.0148128	-0.625575	0.000176266	0.00537246	-0.184415	0.61666	0.926931	-1.88517	2.32e-08	2.69e-06
Mmp11	-0.680687	5.89421e-06	0.000211599	-2.1597	1.62914e-25	2.64545e-23	-0.58862	0.00105421	0.0226664	1.46244	0.000139117	0.0122475	-0.564059	0.00384815	0.029801
0610040J01Rik	-0.674736	9.8152e-06	0.000327072	-0.841555	5.7127e-05	0.000434108	-0.657496	6.67579e-05	0.00249295	0.0427901	0.903579	0.987099	-1.91621	5.79e-08	5.73e-06
Lrrfip1	-0.674602	4.58858e-07	2.30738e-05	-0.0805984	0.884483	NA	-0.590614	0.000195619	0.00588506	-0.708415	0.171489	0.67418	-0.939036	0.000865743	0.0100717
Ebp	-0.669934	5.96093e-05	0.0014951	-0.606326	0.100035	0.199353	-0.5992	0.00218195	0.0382776	-0.00188055	0.997495	1	-0.810081	1.81e-06	8.31e-05
Pnp	-0.669097	2.361e-05	0.000689443	-0.618895	1.75567e-09	4.13176e-08	-0.984896	1.13964e-08	1.25985e-06	-0.555457	0.0294251	0.328535	-1.73578	6.68e-10	1.67e-07
Tspan4	-0.663821	2.0794e-05	0.000614947	-0.309154	0.0216224	0.0601048	-0.856163	4.16962e-07	3.13938e-05	-0.674561	0.0110347	0.197754	-2.52762	1.52e-09	3.07e-07
Stard8	-0.663285	4.82115e-05	0.00126705	0.12392	0.85894	NA	-0.597517	0.000568174	0.0140304	-1.02709	0.20215	0.710806	-1.68413	1.17e-06	6.21e-05
Rdh13	-0.661123	5.60366e-05	0.00142955	-0.980412	7.24329e-07	9.52381e-06	-0.61443	0.00162125	0.0313974	0.222648	0.473373	0.878971	-0.95248	0.000127548	0.00241508
Coro7	-0.660462	2.05223e-05	0.000608201	-0.622373	1.21544e-05	0.000113212	-0.632129	0.000230182	0.00657008	-0.145028	0.619782	0.927665	-0.516121	0.000103909	0.00202765
Bivm	-0.658638	0.00196245	0.0245377	-3.15921	3.84688e-13	1.65111e-11	-0.299589	0.145244	0.525665	3.12412	1.0494e-05	0.00194498	-3.18837	8.95e-06	0.000300338
Prkch	-0.658449	1.51577e-05	0.00046918	-1.35047	1.80398e-12	7.05869e-11	-0.581761	0.000318729	0.00851269	0.647889	0.0342581	0.351609	-2.31566	1.32e-06	6.77e-05
Top3b	-0.656107	1.32317e-06	5.74158e-05	-0.720279	8.29498e-12	2.90963e-10	-0.971786	3.7259e-11	6.82869e-09	-0.385159	0.322628	0.805805	-0.572692	0.00080673	0.00960591
Cyp4f16	-0.655768	0.000266319	0.0050539	-2.41981	5.98459e-07	NA	-0.471722	0.0189797	0.165836	1.99726	0.00104522	0.0481142	-3.33631	4.62e-08	4.72e-06
Abcb1b	-0.655127	5.12962e-06	0.000187465	-1.61542	1.16801e-23	1.51733e-21	-0.33829	0.0543331	0.314814	1.21445	4.26134e-05	0.00545684	-1.46377	2.04e-05	0.000572186
Zfp64	-0.653021	5.72665e-06	0.000206115	-1.48867	1.1821e-35	3.97144e-33	-0.421268	0.00959259	0.107667	0.971568	9.61829e-06	0.00183085	-0.44966	0.00140731	0.0141307
Cdhr4	-0.649883	0.000135374	0.00288763	0.781595	0.222617	NA	-0.609506	0.000728414	0.0169951	-1.77286	0.00528497	0.132605	-1.48694	8.75e-05	0.00176499
Clic5	-0.649601	1.60209e-05	0.000490451	-0.856074	0.000113695	0.000786183	-0.603743	0.000215691	0.00627214	0.121162	0.794866	0.968973	-1.5389	0.00253363	0.0219662
Syngr2	-0.649335	9.19724e-05	0.00213514	-0.535822	0.000125704	0.000859459	-0.707243	0.000408633	0.01056	-0.3595	0.24491	0.751579	-0.958227	1.18e-07	1.05e-05
Gtf3c5	-0.64256	6.84646e-06	0.000239609	-0.535404	0.242314	NA	-0.564948	0.000816211	0.0186377	0.0177486	0.986207	1	-1.15355	3.22e-07	2.22e-05
Arhgap31	-0.641297	1.07423e-05	0.000352899	-1.44788	1.42638e-17	1.00705e-15	-0.488995	0.00227943	0.0393717	0.868261	0.000697826	0.0373748	-2.75609	8.74e-09	1.17e-06
Ssr4	-0.640502	0.000152534	0.00319015	-0.790749	3.94922e-08	6.92037e-07	-0.629292	0.0032962	NA	-0.0207696	0.936288	0.993967	-0.836829	0.000223512	0.0037093
Akap1	-0.640211	1.02309e-05	0.000338494	-0.580983	3.97927e-05	0.000317267	-0.719798	4.91675e-05	0.00196797	-0.345614	0.391777	0.841029	-1.20242	6.89e-05	0.00146797
Enc1	-0.638738	0.000178302	0.00362565	-0.759328	2.06329e-09	4.79776e-08	-0.775395	5.85095e-06	0.000323405	-0.175468	0.611403	0.924869	-1.18092	0.00425914	0.0318832
Frmd6	-0.637496	5.14447e-06	0.000187465	-0.820346	8.52404e-12	2.97669e-10	-0.651436	4.74978e-05	0.00191809	-0.0225656	0.942911	0.995278	-1.5249	1.54e-06	7.48e-05
Gls2	-0.635394	8.12241e-05	0.0019406	-2.29536	8.16419e-24	1.10477e-21	-0.204081	0.282272	0.687022	1.99781	1.6098e-08	1.07979e-05	-4.54077	7.94e-10	1.95e-07
Pip4k2a	-0.635232	2.32051e-06	9.64846e-05	0.00463839	0.970749	0.983059	-0.73217	5.12328e-07	3.69752e-05	-0.895716	0.00811908	0.169997	-0.866099	0.00585956	0.039692
Pdrg1	-0.63435	9.93629e-06	0.00032953	-0.39132	0.000339526	0.00197636	-1.18629	1.61482e-12	4.01656e-10	-1.02297	0.0024878	0.0858899	-1.40488	8.67e-09	1.17e-06
Epb4.1l4b	-0.63382	4.19341e-06	0.000157865	-0.292405	0.362677	0.510631	-0.576551	0.000125041	0.00405991	-0.442271	0.143476	0.643297	-2.67151	2.4e-10	7.43e-08
Rai1	-0.630233	3.46924e-06	0.000133121	-0.542929	0.00016846	0.0010953	-0.555447	0.000708437	0.0166686	-0.148473	0.521716	0.895423	-0.762588	3.05e-07	2.18e-05
Fancb	-0.628882	0.000334096	0.00608937	-0.894177	2.96443e-06	3.29332e-05	-0.406605	0.105999	NA	0.368093	0.457482	0.873542	-0.904327	0.00136335	0.0138373
St6galnac4	-0.628661	7.17536e-05	0.00174121	-0.690932	9.45336e-09	1.90298e-07	-0.712362	0.000170481	0.00524201	-0.1574	0.574459	0.91114	-1.44636	2.36e-08	2.71e-06
Il18rap	-0.628267	0.00231374	0.027457	-1.31848	0.00621265	NA	-0.560428	0.00619102	0.0795497	0.910298	0.390733	0.840195	-1.81341	5.48e-06	0.000200343
Nudt4	-0.623795	4.49412e-05	0.00119691	-0.419027	0.000134586	0.000912493	-1.0992	6.06179e-11	1.05543e-08	-0.917836	0.008755	0.176428	-2.21042	1.57e-06	7.57e-05
Phldb1	-0.623708	0.00011052	0.00247897	0.533134	0.389418	NA	-0.559162	0.00148496	0.0294226	-1.51379	0.0130372	0.214285	-2.63108	0.000174317	0.00306619
Mrpl24	-0.623258	0.000114648	0.00255235	-1.03067	4.16744e-07	5.80048e-06	-0.416207	0.0322967	0.230108	0.506285	0.286507	0.785029	-1.12517	3.73e-05	0.000917454
Osm	-0.623145	0.00013175	0.00284519	-1.45134	1.06411e-22	1.20554e-20	-0.340124	0.083485	0.395128	0.990139	0.00480838	0.125134	-1.61895	0.000241045	0.00393378
Cyth4	-0.622484	0.000260034	0.00494135	-0.709645	8.31903e-07	1.08214e-05	-0.55105	0.00442617	0.0628461	0.0350591	0.928649	0.992649	-0.498625	0.000585289	0.0075297
Lck	-0.622303	4.50444e-05	0.00119737	-0.122392	0.810004	NA	-0.548753	0.00145125	0.0289191	-0.54901	0.22475	0.731241	-0.853017	3.21e-05	0.000819225
Alpl	-0.620205	2.03241e-05	0.000603613	-0.555633	0.00021973	0.00136969	-0.618348	0.000248959	0.00703397	-0.206649	0.411957	0.84958	-0.849638	0.00144577	0.0144035
Srfbp1	-0.617325	5.24152e-05	0.00135881	-0.271011	0.0235368	0.0643792	-1.15975	8.68214e-11	1.4828e-08	-1.10352	0.00175057	0.0689105	-1.54631	7.49e-07	4.37e-05
Exoc3l2	-0.616944	0.000214568	0.00420947	-1.19315	0.0395596	NA	-0.522068	0.00330248	0.050998	0.883333	0.0912882	0.534998	-1.78184	8.62e-05	0.00174633
Plxnd1	-0.616392	5.78278e-05	0.00146228	-0.117354	0.395328	0.542262	-0.700894	9.02194e-05	0.0031734	-0.738811	0.00367542	0.107634	-1.05435	0.00463242	0.033879
Inpp5a	-0.615056	9.25229e-05	0.00214434	-0.126788	0.476409	0.615906	-0.656969	0.000169689	0.00522921	-0.698408	0.0277508	0.320934	-1.45288	3.41e-07	2.3e-05
Lrrk2	-0.614991	2.89037e-06	0.000115358	-0.669114	8.97781e-08	1.4458e-06	-0.637699	4.75082e-05	0.00191809	-0.112803	0.79558	0.969089	-0.983437	0.00179392	0.0168834
Grn	-0.613942	0.000659151	0.0104929	-1.01167	3.29445e-05	0.000268601	-0.471462	0.0249382	0.195834	0.410459	0.336079	0.813793	-0.983302	1.53e-06	7.48e-05
Ddc	-0.612304	1.19615e-05	0.000387469	0.108617	0.875649	NA	-0.541379	0.000255855	0.00717063	-0.648262	0.453505	0.870537	-1.17793	0.000134654	0.0025195
Tmem55a	-0.612216	2.30389e-05	0.000674179	-0.965939	1.2827e-10	3.78708e-09	-0.555031	0.000521608	0.0129741	0.297791	0.245614	0.752277	-1.09806	0.000937004	0.0105823
Fes	-0.611493	0.000710356	0.01113	-1.35099	4.61666e-16	2.69342e-14	-0.331399	0.111599	0.459238	0.900869	0.00321834	0.0977017	-0.940963	5.7e-07	3.57e-05
Cabp1	-0.610851	2.67631e-05	0.000767045	0.249743	0.181094	0.309761	-0.683426	5.52585e-05	0.00215601	-1.10211	5.34409e-06	0.0011581	-1.65396	1.45e-05	0.000438148
Dld	-0.607059	2.8586e-05	0.000808788	-0.643383	9.8102e-09	1.96668e-07	-0.711815	0.000121862	0.00399392	-0.244898	0.365977	0.828852	-0.610889	0.000566428	0.00736876
Hnf1b	-0.606195	7.42456e-06	0.000257255	-0.994476	0.000363847	0.00209513	-0.514368	0.000872523	0.0196339	0.399032	0.169128	0.671838	-2.06792	2.19e-14	6.13e-11
Trmt61a	-0.605481	0.000382674	0.00680503	-0.602009	3.3899e-06	3.73195e-05	-0.72993	0.000228578	0.00653771	-0.299891	0.270489	0.773452	-0.73463	0.000669896	0.00839804
Cd28	-0.603277	0.00140949	0.0191166	0.358821	0.605215	NA	-0.558723	0.0032663	0.050664	-1.50848	0.186955	0.692226	-1.55843	0.00110835	0.0119164
Nop2	-0.60205	1.41498e-05	0.000443904	-0.401269	0.000667008	0.00349955	-0.763614	1.70923e-05	0.000818337	-0.549331	0.109634	0.573611	-0.703128	0.00195423	0.0180332
9930012K11Rik	-0.599496	0.000764358	0.0117723	-1.26704	1.72017e-16	1.06749e-14	0.193608	0.352376	0.73977	1.42797	6.89068e-07	0.000225726	-1.11923	0.00264378	0.0227341
Bok	-0.599198	0.000430317	0.00747367	-1.3464	3.75364e-07	5.30795e-06	-0.406341	0.0326709	0.232076	0.825355	0.00790946	0.166972	-2.70811	1.97e-06	8.75e-05
Akr1e1	-0.596698	0.000736151	0.011461	-1.62285	7.56875e-13	3.12467e-11	-0.0143402	0.943666	0.988827	1.53326	0.00473869	0.124999	-0.978435	0.00370908	0.0290936
Ephx1	-0.596099	0.000252886	0.00482528	-0.828219	0.222227	NA	-0.513392	0.00541924	0.0725116	0.594143	0.41991	0.85547	-1.78868	9.64e-10	2.28e-07
Ptger2	-0.595505	0.000542228	0.0089806	-1.28521	0.00262439	0.0109224	-0.513753	0.00524958	0.0709916	0.811705	0.468153	0.877322	-2.02815	2.83e-06	0.000116249
Ubxn11	-0.594153	0.000111239	0.00248707	-0.858101	3.24443e-07	4.66921e-06	-0.529272	0.00288605	0.0466355	0.232271	0.378943	0.834694	-0.991938	0.00196046	0.0180645
Ntng2	-0.593711	8.44842e-05	0.00200133	-2.13745	8.51534e-27	1.56538e-24	-0.358229	0.0393189	0.259982	1.71839	1.17358e-08	8.70057e-06	-1.02935	0.000735337	0.00898026
Mpi	-0.593686	6.8074e-05	0.00167232	-1.34791	1.40196e-11	4.80961e-10	-0.364769	0.0254453	0.198226	0.885658	0.0104219	0.195343	-0.79703	0.0012244	0.0128185
Bcat1	-0.593569	0.000192094	0.00385544	-0.801692	3.51358e-07	4.9975e-06	-0.558138	0.00126973	0.0262794	0.0871228	0.818336	0.974393	-0.622135	0.00538918	0.0374869
Aen	-0.59168	1.29199e-05	0.000410872	-0.671144	1.33003e-08	2.5917e-07	-0.669605	2.53889e-05	0.00112985	-0.158308	0.600688	0.920268	-0.565706	0.00138703	0.013982
Ube2d1	-0.591012	0.000142678	0.00301581	-1.21014	5.61628e-14	2.60569e-12	-0.281251	0.0928802	0.419595	0.825465	0.00623402	0.146638	-0.915719	0.000390333	0.0056034
Ocrl	-0.591003	0.000113572	0.00253517	-0.732217	3.66561e-06	3.97706e-05	-0.642605	0.000571839	0.0140304	-0.0939017	0.793893	0.968662	-0.998396	1.67e-05	0.00048936
Kcnj14	-0.590953	0.00017742	0.00361299	-0.56392	0.149399	0.269156	-0.533214	0.00196799	0.035949	0.0303189	0.930044	0.992649	-2.1485	0.000674667	0.00843301
St5	-0.59012	5.42106e-05	0.00139575	-1.36171	0.0099334	NA	-0.519992	0.000496075	0.0124501	1.0428	0.0896861	0.530583	-2.2089	1.27e-08	1.59e-06
Dhrs13	-0.589225	0.000404293	0.00710138	-0.870858	2.24329e-09	5.167e-08	-0.282683	0.184217	NA	0.497128	0.121777	0.599352	-1.58668	0.000103893	0.00202765
Parp16	-0.585803	9.13251e-06	0.000308007	-0.894272	4.28362e-09	9.19279e-08	-0.472803	0.00191983	0.0353255	0.333101	0.114088	0.583318	-1.49889	1.1e-09	2.46e-07
Zbtb32	-0.57877	0.000565031	0.00928103	0.725376	0.232085	NA	-0.538212	0.00122487	0.0255791	-1.66976	0.00609843	0.144374	-1.29285	0.00037985	0.00548998
Ino80e	-0.578332	7.10416e-05	0.00172694	-1.29882	5.53012e-13	2.33246e-11	-0.38331	0.0259493	0.201105	0.84768	0.00954189	0.185471	-0.537879	7.76e-05	0.00160492
Srm	-0.575178	0.000363517	0.00650827	-0.536411	1.38723e-05	0.000125962	-0.823637	2.09872e-05	0.000955331	-0.519505	0.132817	0.621689	-0.638983	0.00679038	0.0447387
Tmem109	-0.574566	8.53336e-05	0.0020146	-0.686113	1.24366e-07	1.94807e-06	-0.486567	0.00607938	0.0783346	0.0975406	0.744097	0.959207	-0.850026	2.8e-05	0.000737154
B4galt4	-0.573717	0.000286873	0.00536357	-0.435436	0.00492944	0.0182614	-0.949947	5.37111e-09	6.62072e-07	-0.658431	0.0115074	0.201863	-0.90449	0.0045073	0.0331406
Slc1a5	-0.570995	6.33303e-06	0.00022389	-0.52972	6.86322e-06	6.9318e-05	-0.576437	5.39114e-05	0.0021153	-0.16207	0.382477	0.835827	-0.508592	0.00110166	0.0118846
Ubqln4	-0.569937	0.000114708	0.00255235	-0.588961	1.63604e-06	1.96547e-05	-0.663869	2.61415e-05	0.0011523	-0.211602	0.288912	0.786993	-0.725465	7.37e-05	0.00154732
Wrap53	-0.569153	0.000626282	0.0100617	-0.841906	0.00204341	0.00886814	-0.459976	0.019307	0.166828	0.175336	0.772952	0.965	-0.93071	0.000165892	0.00294452
Tspan31	-0.569094	4.65241e-05	0.00123112	-1.42331	0.000108443	0.000755275	-0.339555	0.0210269	0.176224	0.942693	0.0753933	0.495432	-0.974188	0.000451804	0.00624694
Polr1a	-0.56905	4.06145e-05	0.00109423	-0.85125	1.07368e-05	0.000101958	-0.465574	0.00163735	0.0315531	0.262424	0.484162	0.883065	-0.750927	1.11e-05	0.000354014
Smpdl3b	-0.569043	0.000177099	0.00361174	-1.68057	1.63811e-06	1.96553e-05	-0.450021	0.00656595	0.0829919	1.11115	0.00729586	0.159332	-3.52792	4.66e-08	4.72e-06
Mrps31	-0.562967	0.000247764	0.00474053	-0.965142	1.23225e-09	2.97173e-08	-0.307989	0.0836576	0.39581	0.529383	0.168487	0.671552	-0.747726	0.00569229	0.0388684
Csgalnact1	-0.560612	0.000631757	0.0101146	-1.83203	1.07694e-23	1.41793e-21	-0.44202	0.0143587	0.139664	1.3176	3.69937e-05	0.00496279	-2.57139	1.5e-09	3.07e-07
Mrvi1	-0.560182	2.45999e-05	0.000712374	-1.28397	0.0238755	NA	-0.482149	0.00106043	0.0227242	0.925045	0.119845	0.595488	-1.24752	2e-05	0.000567255
Ahdc1	-0.559861	3.49004e-05	0.000962629	-0.0680626	0.634153	0.750462	-0.540639	0.000549972	0.0136309	-0.591728	0.00858714	0.173791	-1.6742	1.53e-08	1.87e-06
Baiap2l2	-0.559829	0.000473156	0.00803731	-0.45641	0.354318	NA	-0.475769	0.0102756	0.112966	-0.0932626	0.835831	0.977616	-1.97868	0.002345	0.020797
Pxn	-0.553319	0.000137196	0.00291311	0.242763	0.0683546	0.149323	-0.742231	1.33287e-05	0.000675112	-1.15554	2.0504e-06	0.000525125	-1.13559	1e-06	5.48e-05
Fbxo28	-0.550989	0.000105052	0.00237158	-1.09074	5.10542e-18	3.76834e-16	-0.164453	0.312455	0.711722	0.827493	0.000241613	0.0189076	-0.645925	0.00123641	0.0129019
Nat10	-0.547566	0.00010227	0.00233146	-0.60173	2.53241e-05	0.000211969	-0.552366	0.00048347	0.0122219	-0.0789805	0.788042	0.967853	-0.686603	0.00023857	0.00390337
Hoxb3	-0.546202	0.000365062	0.00652754	-0.362509	0.466769	NA	-0.469988	0.0074818	0.0903068	-0.133091	0.77468	0.965	-1.12337	0.00346543	0.0278325
Rgs3	-0.54474	0.000170867	0.00350002	-0.332076	0.629308	NA	-0.467556	0.00427393	0.0613728	-0.0120249	0.985467	1	-1.14311	0.00132724	0.0135941
Ankrd45	-0.543268	0.00429791	0.0430997	-0.233991	0.671837	NA	-0.518865	0.00780275	0.0928928	-0.504387	0.361329	0.826517	-3.67101	2.02e-06	8.91e-05
Kdelc1	-0.542788	0.00134368	0.0184577	-2.87494	4.77835e-26	8.16763e-24	0.0600114	0.761763	0.938244	2.91936	7.71279e-07	0.000246914	-2.43774	1.18e-10	4.55e-08
Arhgap10	-0.541899	6.27766e-05	0.00156705	-0.566114	1.00767e-05	9.61576e-05	-0.525768	0.00029331	0.00797953	-0.141147	0.643033	0.934191	-1.20156	6.66e-08	6.54e-06
Tsku	-0.541466	0.000684861	0.010779	-0.670291	0.000166282	0.00108367	-0.602093	0.00259068	0.0431849	-0.0997427	0.756999	0.961752	-1.8696	0.00010759	0.00208697
Rai14	-0.538865	0.000563192	0.00926174	-2.17046	1.49788e-14	7.5226e-13	-0.391451	0.0177885	0.158933	1.76896	3.56371e-06	0.00085082	-2.51534	1.17e-05	0.000369175
Jagn1	-0.536852	0.000281599	0.00528625	-0.661365	7.46506e-09	1.52159e-07	-0.525441	0.00247337	0.041912	0.0151322	0.938221	0.994189	-0.958989	0.00155822	0.0152266
Slc43a1	-0.536384	0.000342801	0.0062092	-0.605146	0.292948	NA	-0.448942	0.0122928	0.127401	0.244233	0.638674	0.933587	-0.784688	0.000164942	0.00293173
Ndufaf4	-0.5349	0.00225933	0.0269206	-0.714695	1.2092e-06	1.50655e-05	-0.460453	0.0572646	NA	0.105942	0.784143	0.966378	-0.732263	0.00766504	0.0488037
Nop16	-0.530178	0.00195118	0.0244626	-0.7349	4.75848e-05	0.000371787	-0.376048	0.056742	0.323255	0.255957	0.518063	0.894207	-0.819031	0.000358423	0.00525166
Alg14	-0.528846	5.9654e-05	0.0014951	-0.216275	0.175219	0.301979	-0.555516	0.000284265	0.00780973	-0.507844	0.322987	0.805805	-0.923724	0.00277987	0.0235413
Acacb	-0.527444	0.000679967	0.0107305	-0.382549	0.509519	NA	-0.450799	0.00858257	0.0989625	-0.0756832	0.884345	0.982982	-1.62648	3.85e-06	0.000151264
Prmt5	-0.527018	0.00147439	0.0197469	-0.684275	3.59111e-08	6.34994e-07	-0.620408	0.000227064	0.0065212	-0.0579798	0.815411	0.973661	-0.71845	1.69e-05	0.000492386
BC017158	-0.525944	0.000194434	0.00389119	-0.700947	1.96055e-06	2.30417e-05	-0.47659	0.00302705	0.0481286	0.106043	0.636332	0.933015	-0.750333	0.0018916	0.0176208
Samd4	-0.520723	0.000200716	0.00399967	-0.0669646	0.876717	NA	-0.448136	0.00396743	0.0584786	-0.581156	0.132782	0.621689	-1.53985	6.14e-06	0.000218026
Gnl3	-0.5204	0.00127826	0.0177517	-0.626941	4.62488e-08	7.98939e-07	-0.656444	0.000631286	0.0152131	-0.196379	0.475069	0.879693	-1.00522	0.000170156	0.00301182
Frmd4a	-0.519419	0.00158833	0.020911	-0.668172	0.324601	NA	-0.461191	0.00461775	0.0649048	0.434992	0.542422	0.901684	-1.95246	3.49e-07	2.35e-05
Armcx3	-0.516855	0.00510028	0.0488596	-0.676743	0.00193389	0.00846824	-0.471462	0.0267098	NA	0.0828593	0.835391	0.977616	-0.778871	0.000164746	0.00293173
Alg3	-0.51526	0.00356908	0.037719	-0.639059	1.22685e-06	1.52659e-05	-0.531679	0.0126373	NA	-0.022233	0.942662	0.995278	-0.753548	0.00147027	0.014568
Dna2	-0.51321	0.00039447	0.00696397	-0.644378	5.10814e-08	8.64038e-07	-0.613828	0.00016413	0.00511448	-0.119563	0.678009	0.94362	-0.822941	5.19e-05	0.00116983
Ubash3b	-0.508208	0.00020161	0.00401174	-0.447205	0.490886	NA	-0.435861	0.00278709	0.0456185	-0.109431	0.863226	0.981654	-0.618446	0.00343545	0.0277664
Gemin6	-0.50565	0.00218796	0.0264549	-0.630067	4.33636e-06	4.62245e-05	-0.316566	0.179011	NA	0.197598	0.627878	0.929911	-1.03002	0.00245339	0.0214747
Ydjc	-0.504413	0.000275469	0.00519919	0.310393	0.642162	NA	-0.429651	0.00797464	0.0941346	-1.11857	0.0773363	0.503097	-1.79082	0.000342432	0.00504632
Il6st	-0.502587	0.000944093	0.013857	0.354463	0.599778	NA	-0.442676	0.00465319	0.0652513	-1.6208	0.113787	0.582624	-0.858815	0.00433111	0.0322295
Mrps25	-0.502407	0.000920419	0.0136099	-0.999109	4.7794e-07	6.54012e-06	-0.32299	0.0512586	0.303536	0.565575	0.183971	0.68726	-1.2452	0.00102158	0.0112102
Kcnk6	-0.501919	0.00288353	0.0324957	-0.884701	1.31091e-06	1.621e-05	-0.376181	0.0747692	0.375301	0.36986	0.257005	0.765366	-1.51382	1.22e-05	0.000378915
Plaur	-0.50181	0.00463066	0.0456156	-1.4637	4.91844e-05	0.000383056	-0.296718	0.12053	0.477449	1.1374	0.00256133	0.0866542	-3.02311	0.00293462	0.0245573
Pus7	-0.499544	0.000328061	0.00600469	-0.657144	1.9442e-06	2.29604e-05	-0.6387	6.03614e-05	0.00230349	-0.13534	0.646708	0.934457	-0.939384	0.000186352	0.00321382
Rbpms2	-0.497534	0.000919613	0.0136099	-0.445819	0.232111	0.372624	-0.41102	0.0177332	0.15854	0.0330758	0.92558	0.991764	-1.49375	6.87e-05	0.00146759
Tgif1	-0.496111	0.000667409	0.0106002	-0.152446	0.377794	0.52531	-0.422326	0.0145152	0.140502	-0.384674	0.13372	0.623326	-0.645061	0.00303294	0.0251882
Nexn	-0.496017	0.00464079	0.0456508	0.0368365	0.953191	NA	-0.443327	0.0130825	0.132683	-0.545605	0.385419	0.837041	-2.78882	8.51e-07	4.83e-05
Camkk2	-0.495544	0.000782503	0.011925	0.0695754	0.63655	0.752659	-0.648353	9.95684e-05	0.00340052	-0.872409	0.000276738	0.020625	-1.15638	5.18e-07	3.32e-05
Cd3eap	-0.494745	0.00388821	0.0399696	-0.757641	8.89298e-08	1.43451e-06	-0.246908	0.246671	0.656705	0.38093	0.194301	0.704124	-0.504623	0.00737988	0.0476389
Rtkn	-0.493233	0.00248735	0.0290171	-0.234815	0.629967	NA	-0.415749	0.0221508	0.182351	-0.27944	0.520602	0.895126	-1.56961	0.000565062	0.00736601
Zbtb45	-0.491401	0.00169426	0.0219085	-0.610828	4.34606e-05	0.000342309	-0.43265	0.0251655	0.196927	0.0606514	0.805427	0.971838	-1.22994	2.04e-07	1.59e-05
Sh3bp2	-0.488734	0.000601941	0.00971546	-0.584052	1.70571e-05	0.000151217	-0.499465	0.00398852	0.0586034	-0.111549	0.740322	0.957855	-1.15225	8.64e-07	4.88e-05
Mlec	-0.485616	0.000226958	0.00440906	-0.0493123	0.628485	0.745747	-0.795399	2.28549e-07	1.88371e-05	-0.884782	0.00556094	0.137183	-0.58548	0.000117305	0.00225459
Sorbs3	-0.481786	0.00519496	0.0494256	0.102257	0.88374	NA	-0.408957	0.0303417	0.221116	-0.802121	0.356002	0.824913	-3.13283	0.0072615	0.0470445
Luc7l	-0.479493	0.000352971	0.00634391	-0.68715	3.52582e-11	1.13373e-09	-0.336826	0.0344408	0.238669	0.215505	0.318621	0.804817	-0.939825	0.00131668	0.0135076
Tuba4a	-0.477517	0.00106205	0.0152981	-0.164548	0.15249	0.273491	-0.73396	3.86307e-05	0.00159197	-0.709229	0.00388465	0.110828	-0.661691	0.000904183	0.0103121
Pomt1	-0.475039	0.00138749	0.0188941	-0.752385	1.13621e-09	2.75528e-08	-0.386457	0.025491	0.19836	0.251365	0.295621	0.791139	-1.06575	2.11e-07	1.63e-05
Trp53	-0.473755	0.000616409	0.00992596	-1.37977	1.69725e-12	6.72208e-11	-0.188598	0.241141	0.649999	1.10281	0.0219882	0.282082	-0.793987	6.43e-06	0.000225458
Mdn1	-0.473286	0.00260216	0.0300109	-0.561407	0.000228934	0.0014198	-0.477501	0.00644729	0.0818514	-0.103391	0.773397	0.965	-1.04636	9.35e-05	0.00185201
Nbn	-0.472564	0.0020334	0.02512	-0.901435	1.381e-12	5.51438e-11	-0.173176	0.324459	0.72114	0.635668	0.00695018	0.155151	-1.5757	8.91e-08	8.42e-06
Dnase1l1	-0.472472	0.000997003	0.0145416	-0.453375	0.0410098	0.0996903	-0.4099	0.0131503	0.133108	-0.0726114	0.895116	0.984919	-1.15788	0.000225812	0.00374261
Scamp3	-0.47152	0.00496239	0.0480008	-0.891422	1.58637e-11	5.38535e-10	0.183069	0.334394	0.728505	1.01766	1.30423e-05	0.0022943	-0.508849	0.00559336	0.0383728
Ccbl2	-0.467724	0.00221779	0.0266078	-1.19957	3.02733e-14	1.46743e-12	-0.19562	0.231145	0.642254	0.919854	0.000103941	0.00976079	-0.935658	4.98e-05	0.00113656
3110082I17Rik	-0.467002	0.0023142	0.027457	-0.434237	0.00622172	0.0220912	-0.403629	0.0273715	0.207996	-0.117926	0.688463	0.945058	-0.724949	0.000362681	0.00529581
1700052N19Rik	-0.464574	0.0025698	0.0297054	-0.786168	3.03943e-09	6.79201e-08	-0.302761	0.0616286	0.337748	0.383999	0.160045	0.66207	-0.348229	0.00533108	0.0371981
Micall2	-0.463484	0.00261803	0.0301127	-0.0329609	0.880916	0.929223	-0.470352	0.00807263	0.0948092	-0.595521	0.0316792	0.337799	-1.66638	0.00038684	0.00557207
Mettl13	-0.462354	0.00317902	0.034733	-0.711653	8.26449e-07	1.07792e-05	-0.377386	0.0242661	0.193255	0.186849	0.580513	0.913439	-0.581526	0.000756705	0.00911905
Trpc7	-0.459692	0.00447688	0.0444465	0.575722	0.361664	NA	-0.401726	0.0166251	0.152953	-1.27212	0.0285318	0.325161	-2.56111	6.07e-06	0.000216481
Camkk1	-0.458363	0.0034314	0.0367661	-0.474501	0.0504524	0.117654	-0.416025	0.0240333	0.192247	-0.0555776	0.851651	0.979454	-0.783075	4.64e-05	0.00108665
Lhpp	-0.44557	0.00485438	0.0472704	-0.407808	0.00280415	0.0115327	-0.446803	0.0137288	0.136299	-0.172978	0.517693	0.894108	-1.50527	4.48e-08	4.61e-06
Fam73b	-0.444697	0.00193661	0.0243237	-0.72774	1.91986e-05	0.000166713	-0.348437	0.0617405	0.338177	0.0987353	0.835641	0.977616	-0.600974	2.71e-05	0.000718531
Slc15a3	-0.442814	0.00344261	0.0368013	-0.409833	0.52647	NA	-0.361346	0.0428021	0.273672	0.270763	0.654085	0.936029	-0.725112	0.00355645	0.0283494
Cd44	-0.442586	0.00489556	0.0475857	-1.09589	5.94396e-10	1.51602e-08	-0.277998	0.141237	0.51839	0.669139	0.111028	0.575685	-1.15705	2.71e-05	0.000718531
Hilpda	-0.442298	0.00474951	0.0464252	-0.536529	2.06995e-07	3.09317e-06	-0.564744	0.00588068	0.0764818	-0.177306	0.499141	0.886875	-1.15196	0.00248182	0.0216526
Ak2	-0.442147	0.00143078	0.0192927	-0.188763	0.765705	NA	-0.360233	0.0300756	0.22037	-0.139485	0.812282	0.972591	-0.573207	0.000200983	0.0034063
Uck2	-0.439009	0.003092	0.0342356	-0.630773	1.06217e-06	1.34051e-05	-0.336238	0.0504227	0.300494	0.187013	0.446071	0.867135	-0.806485	0.0020363	0.0185756
Orai1	-0.438969	0.00427339	0.0429466	-0.285147	0.0206772	0.0580904	-0.918906	3.28732e-08	3.27065e-06	-0.811586	0.00468314	0.123811	-0.752434	0.000186755	0.00321643
Slfn9	-0.438438	0.00444795	0.0442223	-0.0896015	0.669858	0.776216	-0.486012	0.00410177	0.0598885	-0.56106	0.161227	0.664003	-1.58022	0.000871993	0.0100958
Abca1	-0.43708	0.00225347	0.0268738	-1.09374	7.94255e-05	0.000576634	-0.358804	0.0209085	0.175705	0.660039	0.0361812	0.362481	-4.74682	1.96e-07	1.54e-05
Zbtb34	-0.436519	0.0015834	0.0208856	-0.127821	0.336957	0.485216	-0.74611	2.76973e-06	0.000166291	-0.782563	0.00269331	0.0884932	-1.03046	0.00146772	0.014568
Nsl1	-0.434295	0.00216604	0.0262355	-0.649855	1.26995e-07	1.98288e-06	-0.385375	0.0118855	0.124851	0.151305	0.605066	0.922364	-0.779841	0.000312264	0.00477259
Hip1	-0.433216	0.00184911	0.0235089	0.177846	0.75154	NA	-0.35601	0.0287199	0.214154	-0.700622	0.150019	0.650485	-1.44557	1.13e-06	6.01e-05
Magt1	-0.431338	0.00463834	0.0456508	-0.558558	3.41518e-05	0.000277747	-0.540623	0.00323619	0.0503653	-0.122712	0.692799	0.94644	-0.692927	0.000266334	0.00423
Arhgap23	-0.430746	0.00445232	0.0442342	-1.371	1.57719e-13	7.08136e-12	-0.289547	0.0952187	0.424993	1.00823	0.00671256	0.152015	-2.06342	1.51e-06	7.42e-05
Bcat2	-0.427989	0.00422649	0.0426909	-0.472337	5.90915e-06	6.06669e-05	-0.584996	0.000691132	0.0163999	-0.250817	0.231295	0.737673	-0.957336	0.00142114	0.0142359
Rxra	-0.427483	0.00480008	0.0468149	0.103939	0.803696	NA	-0.349301	0.0468747	0.288774	-0.648664	0.0887049	0.529181	-0.849028	0.0074909	0.0481208
Dhx33	-0.426481	0.0026468	0.0302687	-0.344167	0.00861376	0.028767	-0.703748	5.6202e-05	0.00218061	-0.588305	0.114414	0.583536	-0.734088	8.28e-05	0.00169262
Mapk14	-0.422266	0.00128114	0.0177562	-0.625047	2.00226e-07	3.00123e-06	-0.405216	0.0051988	0.0707378	0.0776973	0.805131	0.971565	-0.620143	0.00025499	0.00408818
Chchd4	-0.41742	0.0050663	0.048668	-0.472034	0.000101321	0.000710708	-0.686534	5.48577e-05	0.00214638	-0.371913	0.216978	0.723782	-0.461579	0.0039692	0.0304
Nif3l1	-0.416555	0.00264469	0.0302687	-0.678614	4.72307e-06	5.00184e-05	-0.295261	0.0531375	0.310988	0.279878	0.320434	0.805287	-0.597213	0.00102029	0.0112057
Carns1	-0.412506	0.0043121	0.0431799	-0.672726	0.00714573	0.0247585	-0.323575	0.0628839	0.340877	0.284649	0.369575	0.82954	-0.940521	0.00027149	0.00429871
Mtap	-0.411735	0.00299702	0.0333964	-0.234847	0.0561676	0.12813	-0.381284	0.017392	0.156887	-0.263016	0.142708	0.641487	-0.878196	0.00265061	0.0227373
Pag1	-0.411721	0.00250149	0.0291135	0.150987	0.203265	0.338996	-0.662628	2.42722e-06	0.000147637	-0.987015	0.00144445	0.0605553	-1.15803	0.00491589	0.0351072
Dctd	-0.404437	0.00339404	0.0365344	0.521965	0.456502	NA	-0.324048	0.0460799	0.285901	-1.24189	0.180824	0.684321	-0.787135	0.00360999	0.0286331
Usp36	-0.39957	0.00301852	0.0336091	-0.133724	0.268851	0.413157	-0.53933	0.00133863	0.0272202	-0.57369	0.0487589	0.418846	-0.735702	0.00143653	0.0143563
Filip1	-0.396766	0.00265452	0.0303321	0.288025	0.634258	NA	-0.324749	0.0231504	0.187815	-0.786534	0.152306	0.653423	-1.05772	0.000775073	0.00929651
Lsg1	-0.383499	0.00518947	0.0494081	-0.395846	0.00421118	0.0160272	-0.432428	0.00499091	0.0686941	-0.14925	0.603152	0.922055	-0.649275	0.000499719	0.00674146
Esr1	0.399692	0.00370564	0.0386926	-0.34454	0.52687	NA	0.469882	0.00301625	0.0481252	0.682422	0.222749	0.729945	-2.12487	0.000299469	0.00461016
Ezh1	0.401803	0.00522878	0.0496129	0.497806	8.21387e-05	0.000592798	0.349818	0.0346274	0.239367	-0.223676	0.262656	0.769023	-0.490553	0.0052027	0.0364818
Klhdc1	0.461255	0.00167151	0.0216985	-0.660529	0.103348	NA	0.543675	0.00156145	0.030547	1.34341	0.00827119	0.170672	-1.50723	0.0054033	0.0375378
Csnk1g2	0.533837	0.000831775	0.0125387	0.688013	1.12192e-09	2.73271e-08	0.413695	0.0296035	0.218289	-0.313677	0.21428	0.720179	0.29097	0.0063692	0.0424902
Polb	0.488946	0.00126766	0.0176219	0.521305	1.3083e-05	0.000119772	0.196515	0.275524	0.682065	-0.425097	0.166023	0.669682	0.448653	0.00202288	0.0184664
Fdft1	0.56618	0.000133983	0.00287115	0.513673	0.00292931	0.0119315	0.566432	0.000696924	0.0164374	-0.0126156	0.962169	0.99837	0.466235	0.00361705	0.0286374
Fam76a	0.468546	0.00228011	0.0271218	0.54221	3.73701e-05	0.00030041	0.0944768	0.570823	0.860793	-0.554183	0.0403605	0.380534	0.476245	0.00648773	0.0429888
Slc25a23	0.480484	0.001214	0.0170462	0.658504	6.89303e-05	0.000513054	0.360439	0.0400906	0.264029	-0.396912	0.177123	0.679875	0.478307	0.00519433	0.0364431
Birc3	0.666461	4.57075e-07	2.30674e-05	0.537328	2.472e-07	3.64367e-06	0.807571	6.5963e-08	6.12533e-06	0.229684	0.171377	0.67418	0.500343	0.00546285	0.0377829
Mdm1	0.437884	0.00403465	0.041111	0.547234	0.000192699	0.00122231	0.169349	0.285827	0.689302	-0.473387	0.0618256	0.460647	0.513115	0.00240347	0.0211685
Tax1bp1	0.556834	0.000383024	0.00680503	0.501931	1.96881e-06	2.3111e-05	0.520913	0.00549855	0.0731218	-0.0129637	0.961375	0.99837	0.523802	0.00177257	0.0167319
Sqstm1	0.476698	0.00248719	0.0290171	0.521779	7.18515e-07	9.46012e-06	0.329396	0.0618826	0.338555	-0.283629	0.37098	0.830373	0.531249	0.000412842	0.0058436
Rfk	0.532222	0.00172173	0.0222055	0.569708	1.5722e-06	1.90049e-05	0.192358	0.36279	NA	-0.440994	0.062348	0.462513	0.532996	0.00418743	0.0315561
Pink1	0.518482	0.00114486	0.0162557	1.00618	4.81971e-14	2.24682e-12	0.411454	0.0246273	0.194464	-0.649612	0.0169764	0.248318	0.552357	0.00318887	0.0260853
Acadl	0.54576	0.000467838	0.00799832	0.715679	1.11559e-07	1.75876e-06	0.282158	0.0740883	0.372958	-0.531541	0.0520348	0.430154	0.553462	9.28e-05	0.00184227
Lrrc42	0.589944	0.000480287	0.0081287	0.580798	0.000423888	0.00237626	0.3803	0.0486827	0.294443	-0.268861	0.429834	0.860321	0.562374	0.00174358	0.0165194
Mbd2	0.677105	3.3201e-07	1.72559e-05	0.195948	0.112287	0.217497	0.731396	4.46038e-07	3.28723e-05	0.484745	0.0191421	0.26409	0.564994	0.00249053	0.0216957
Slc25a46	0.575778	0.000405404	0.00711192	0.697793	0.174549	NA	0.636071	0.000680268	0.0162251	-0.275969	0.59979	0.920268	0.565456	0.000496683	0.00672894
Smarca4	0.397624	0.00434607	0.0434576	0.0338968	0.768118	0.848789	0.471968	0.00299115	0.0478343	0.389793	0.122009	0.599586	0.566556	0.000119452	0.00228896
Cyld	0.69124	1.98691e-05	0.000593898	0.718081	1.08069e-07	1.71206e-06	0.587313	0.000710188	0.0166816	-0.161505	0.515394	0.894108	0.570452	0.00161466	0.0156226
Snrk	0.58552	7.80174e-05	0.0018704	0.625488	3.55974e-07	5.05577e-06	0.437762	0.00422164	0.0608099	-0.26959	0.251168	0.758674	0.573115	0.00227025	0.0202466
Cux1	0.747132	2.76023e-08	1.89395e-06	0.139858	0.234682	0.375391	0.823302	2.5409e-08	2.56465e-06	0.658286	0.0552993	0.439546	0.578066	2.58e-05	0.000691027
Dhrs7	0.484062	0.00241967	0.0284419	0.520793	0.000101427	0.00071094	0.0400256	0.841623	0.962354	-0.562453	0.0128128	0.212831	0.586955	0.0038483	0.029801
Ero1lb	0.590828	5.49042e-05	0.00140581	0.548676	6.56274e-07	8.72545e-06	0.464858	0.00668466	0.0838834	-0.156883	0.546059	0.902205	0.589851	0.000889882	0.0102145
Pkn1	0.471253	0.00126233	0.0175654	0.561148	2.89672e-06	3.23916e-05	0.361284	0.0310527	0.224728	-0.270435	0.249275	0.756091	0.590229	2.27e-06	9.64e-05
Fbxw17	0.604315	4.65793e-05	0.00123112	0.656316	1.55771e-07	2.39382e-06	0.222456	0.242045	0.650985	-0.515227	0.127285	0.611087	0.591521	0.00199495	0.0182637
Tmem194b	0.642404	0.000127903	0.00278804	0.612158	1.84177e-06	2.18834e-05	0.509512	0.00365095	0.054918	-0.136849	0.690074	0.94552	0.591776	0.000830735	0.00982562
Mgea5	0.405956	0.00428852	0.0430677	0.279382	0.00659171	0.0232187	0.48278	0.00304348	0.0482282	0.170543	0.38072	0.835827	0.597447	0.0012439	0.0129377
Gabarapl2	0.493885	0.00206821	0.0254264	0.542484	0.000321848	0.00189178	0.282696	0.102985	0.44097	-0.380164	0.244795	0.751579	0.621646	0.00018085	0.00314442
Phlpp2	0.429646	0.00429776	0.0430997	0.421378	0.00491968	0.0182409	0.282298	0.0756675	0.377106	-0.216947	0.404648	0.847365	0.62199	0.00508313	0.0358998
Mterfd3	0.507355	0.00125963	0.0175454	0.239048	0.214401	0.35161	0.646201	0.00220645	0.0385484	0.394823	0.360385	0.826233	0.622454	0.0073945	0.047685
Hmgcr	0.63559	1.27574e-05	0.000408501	0.514646	5.87157e-06	6.04083e-05	0.549516	0.000473103	0.0120253	-0.0616917	0.835011	0.977616	0.633129	0.000563054	0.00734734
Agbl5	0.402596	0.00362572	0.038144	0.654064	1.64065e-08	3.15283e-07	0.376052	0.0178327	0.159117	-0.331595	0.0736287	0.491125	0.640207	4.9e-05	0.00112707
Ctcf	0.512489	0.000450241	0.00774909	0.385087	0.000795103	0.00403894	0.569079	0.000476119	0.0120799	0.132564	0.535002	0.899704	0.64037	0.00162852	0.0156855
Tmem110	0.439926	0.00235947	0.0278753	0.57913	6.53259e-07	8.70685e-06	0.213663	0.179387	0.581225	-0.463739	0.0572073	0.445452	0.645276	0.00122588	0.0128235
Adprh	0.539231	0.00204221	0.0251957	0.522083	0.000193154	0.0012244	0.408821	0.0340612	0.237576	-0.163223	0.529427	0.898279	0.646022	0.00143956	0.0143641
Ugp2	0.50874	0.00121368	0.0170462	0.440021	0.00023491	0.00144948	0.561429	0.00181195	0.033832	0.0885902	0.7131	0.951212	0.651887	0.00664637	0.0439487
AI413582	0.495363	0.000937803	0.0137937	0.624538	2.94283e-08	5.29982e-07	0.479089	0.00764605	0.0915751	-0.199414	0.466093	0.876787	0.654028	0.000455297	0.00627483
Ncoa7	0.514156	0.00159746	0.0209916	0.543301	4.39128e-06	4.66567e-05	0.446608	0.0203643	0.172434	-0.15517	0.625641	0.929653	0.654133	0.00485281	0.0347345
B3gat3	0.49016	0.00238429	0.0280971	0.351517	0.00229474	0.00974673	0.753261	8.57988e-05	0.0030487	0.397389	0.194426	0.704385	0.660529	0.00507481	0.0358807
Setx	0.511318	0.000438173	0.00758176	0.199692	0.616601	0.735408	0.57434	0.000784482	0.0180612	0.262401	0.559226	0.907018	0.661961	0.00136925	0.0138685
Naglu	0.476364	0.0040196	0.0410176	0.401699	0.000553032	0.0029802	0.522124	0.00691674	0.0856049	0.0531043	0.876527	0.982682	0.663461	0.000577629	0.00746123
Tle3	0.38174	0.00448846	0.0445176	0.0265252	0.828656	0.892955	0.484617	0.00210762	0.037541	0.398424	0.0674286	0.474529	0.66652	0.00609634	0.0409697
Fam63b	0.721281	1.02972e-06	4.61188e-05	0.743004	1.12963e-10	3.35548e-09	0.624924	0.000235803	0.00670307	-0.170635	0.490969	0.886007	0.668239	0.000723825	0.00886512
Itm2b	0.520642	0.000680236	0.0107305	0.408228	0.00019115	0.00121448	0.439177	0.00557964	0.0738464	-0.0285531	0.920122	0.990663	0.671381	0.000396593	0.00566778
Pnpla2	0.486813	0.00297334	0.0331856	0.450478	7.34956e-05	0.000542611	0.575373	0.00432876	0.0617819	0.102517	0.701487	0.948491	0.674142	0.000487277	0.00662967
Lrp10	0.47271	0.00137998	0.0188263	0.612095	1.84386e-08	3.51561e-07	0.304835	0.0579259	0.326603	-0.376705	0.0401477	0.379544	0.685227	0.000894785	0.0102415
D930015E06Rik	0.635985	1.86364e-06	7.96276e-05	0.357353	0.000341805	0.00198345	0.675134	8.88319e-06	0.000468689	0.27258	0.183232	0.686256	0.685294	1.08e-05	0.000347588
Zfp821	0.580373	0.000291636	0.00542349	0.615726	0.000101084	0.000709555	0.57808	0.000572134	0.0140304	-0.104715	0.693704	0.94644	0.691926	0.00730938	0.0472742
Pgm3	0.514514	0.000876399	0.0130366	0.534994	7.8511e-06	7.79748e-05	0.182966	0.339677	0.730605	-0.457077	0.192033	0.698778	0.693868	0.000867099	0.0100777
Dak	-0.718974	2.84856e-08	1.9355e-06	-0.0685924	0.583148	0.709138	-1.0076	7.191e-12	1.56505e-09	-1.08111	0.0136318	0.2197	0.694484	5.57e-05	0.00124624
Evl	0.392196	0.00382139	0.0393991	0.509357	7.1026e-05	0.000527444	0.336371	0.0267889	0.205249	-0.291685	0.275894	0.776819	0.696247	0.000485828	0.00662408
Synrg	0.592813	4.45239e-05	0.00118807	0.581808	3.05483e-07	4.41735e-06	0.328553	0.0466541	0.287797	-0.342432	0.266089	0.77152	0.699097	7.56e-05	0.00157675
Satb1	0.471854	0.00103503	0.0150176	0.682614	8.04274e-05	0.000583039	0.515665	0.00180756	0.033832	-0.235252	0.314531	0.801318	0.69948	0.000150499	0.0027321
Tbc1d10a	0.452607	0.00349694	0.0372107	0.451287	0.000135811	0.000918254	0.104436	0.551668	0.852473	-0.455881	0.0873269	0.526136	0.703731	0.00262051	0.0225813
Arl2bp	0.63133	0.000109163	0.00245248	0.544255	1.41339e-05	0.000128099	0.613077	0.00135733	0.0274681	0.0538258	0.815982	0.973896	0.705685	0.00544159	0.0377011
Serp1	0.626539	0.00012782	0.00278804	0.52546	1.2728e-07	1.98414e-06	0.856872	8.21715e-06	0.000438531	0.328863	0.27952	0.778364	0.710996	0.000314829	0.00480029
Lbr	0.431725	0.00275095	0.0311782	0.25403	0.0280437	0.0739458	0.428565	0.00386202	0.0573189	0.101001	0.725985	0.95348	0.721134	0.001344	0.0137327
Asb1	0.535911	0.000746614	0.011568	0.588787	2.68e-06	3.02915e-05	0.292365	0.101795	0.438571	-0.372009	0.103899	0.562701	0.727669	0.00159303	0.0154838
Pip4k2c	0.458578	0.00202011	0.0250647	0.660862	1.49279e-07	2.30495e-06	0.148087	0.407344	0.776926	-0.620047	0.0151857	0.229725	0.729291	0.000237731	0.00389463
Ttpal	0.841204	2.24559e-10	2.48244e-08	0.341472	0.0036916	0.0143927	0.889675	4.53505e-09	5.7953e-07	0.521299	0.0985144	0.551817	0.729522	0.00290267	0.0243503
Tigd2	0.5414	0.000597178	0.00967219	0.508326	6.4871e-06	6.59059e-05	0.138909	0.584154	NA	-0.448756	0.240121	0.745831	0.730421	0.000319525	0.0048168
Aacs	0.404421	0.00294009	0.0328935	0.540122	5.91769e-06	6.06906e-05	0.297239	0.0722412	0.368192	-0.407686	0.289396	0.787711	0.731616	0.00105109	0.0114471
Trim59	0.681534	0.000349934	0.00629746	0.761564	2.09171e-09	4.85228e-08	0.468991	0.051076	0.302906	-0.292752	0.513181	0.893677	0.734045	0.00489334	0.0349657
Tmem66	0.495259	0.00354021	0.0374708	0.583659	1.91216e-05	0.000166193	0.10111	0.585185	0.86704	-0.536505	0.0303331	0.332249	0.746189	2.09e-05	0.000582256
Gyg	0.571786	8.97912e-05	0.00208798	0.686656	8.6263e-06	8.44857e-05	0.610225	0.000140421	0.00448607	-0.12496	0.600112	0.920268	0.746442	0.000701905	0.0086548
H2-T23	0.672477	2.82368e-05	0.000804316	0.891281	7.10153e-06	7.14037e-05	0.589136	0.00150021	0.0295247	-0.282641	0.477349	0.881943	0.758509	0.00357133	0.0284325
Epb4.1l5	0.709902	2.34627e-06	9.72656e-05	0.753266	3.74415e-09	8.15017e-08	0.677536	5.27923e-05	0.00207724	-0.119405	0.635899	0.932826	0.760615	0.00238577	0.0210711
E2f2	0.579332	4.98654e-05	0.00130559	0.677849	1.06162e-06	1.34051e-05	0.62002	0.000217001	0.006284	-0.100993	0.681699	0.944143	0.769717	6.82e-06	0.000237471
Tulp4	0.382269	0.00414542	0.0419939	0.696514	1.05993e-11	3.64909e-10	0.328071	0.0364958	0.247854	-0.441288	0.0333498	0.34415	0.776193	0.000396361	0.00566778
Gltscr1	0.57582	3.72353e-05	0.00101703	0.173393	0.76316	NA	0.647584	8.19855e-05	0.00295084	0.305289	0.500099	0.886951	0.778817	0.000991366	0.0110304
Htatip2	0.665366	2.86594e-05	0.000808788	0.569594	2.11234e-05	0.000181372	0.403525	0.0293161	0.217336	-0.223614	0.451827	0.869935	0.77954	3.5e-06	0.000140161
Ngly1	0.570862	0.000384114	0.0068157	0.460842	1.47409e-05	0.000133105	0.543911	0.00477351	0.0662817	0.0572935	0.835929	0.977616	0.782738	0.00700594	0.0458512
Leprotl1	0.645117	0.000117301	0.0025976	0.797917	1.94298e-12	7.54203e-11	0.524914	0.0070126	0.08622	-0.265335	0.407723	0.84882	0.782775	0.00286054	0.0240489
Mlycd	0.532079	0.000503363	0.00843723	0.455468	8.83937e-05	0.00063134	0.553252	0.00132516	0.0271044	0.0494271	0.823051	0.97572	0.787049	0.00311154	0.0256521
Dpy19l3	0.388087	0.0043621	0.0435865	0.893254	4.57585e-08	7.91874e-07	0.257615	0.0890115	0.410136	-0.736197	0.00111583	0.0498969	0.790913	0.00143235	0.0143258
Top2b	0.536039	0.000631251	0.0101146	0.414671	0.000116488	0.000803784	0.60093	0.00149863	0.0295247	0.172614	0.495314	0.886875	0.799898	0.00548107	0.0378514
Commd10	0.457323	0.000802599	0.0121515	0.469253	6.80364e-05	0.000506788	0.306266	0.0502881	0.300113	-0.222866	0.296766	0.791948	0.801383	4.98e-05	0.00113656
Rnf215	0.469003	0.00304031	0.0337707	0.527127	8.51501e-06	8.37998e-05	0.091258	0.680154	0.908316	-0.555947	0.103044	0.56237	0.807937	0.00488287	0.0349104
Ifngr1	0.471191	0.00316178	0.0346775	0.41182	0.00175278	0.00782287	0.37254	0.0211032	0.17657	-0.0915592	0.744819	0.959443	0.812744	1.15e-05	0.000362968
Serinc3	0.797038	1.75089e-08	1.26363e-06	0.630532	6.14655e-10	1.5636e-08	0.794274	1.68119e-07	1.42788e-05	0.112973	0.74871	0.960258	0.815252	0.0038198	0.0297246
Slc25a26	0.390216	0.00273239	0.0310183	-0.141954	0.311462	0.459366	0.488375	0.000926722	0.0205874	0.595644	0.0665458	0.471986	0.824854	0.000191787	0.0032942
Wdtc1	-0.542625	0.000211266	0.00416228	0.295	0.640624	NA	-0.460816	0.00774086	0.0922348	-1.16819	0.0454433	0.407716	0.825742	0.00139493	0.0140448
Pias3	0.563252	0.000544065	0.00900034	0.240781	0.0847071	0.17582	0.696108	0.000264089	0.00735698	0.46434	0.198802	0.707808	0.826821	0.000268485	0.0042564
Pla2g16	0.628919	0.000122969	0.00271018	0.875226	3.54803e-05	0.000287113	0.460682	0.0112707	0.120391	-0.476104	0.137182	0.630453	0.828719	0.00779274	0.0494289
Rnf157	0.460568	0.00070667	0.0110972	0.592946	9.71546e-07	1.23897e-05	0.416859	0.0109124	0.117877	-0.284543	0.339262	0.814958	0.830581	2.73e-05	0.000722192
Tbc1d1	0.379942	0.00323767	0.0352049	0.30647	0.329561	0.477672	0.451339	0.00364824	0.054918	0.0650249	0.810398	0.972591	0.839935	0.000320108	0.0048168
Tpm4	0.413931	0.00194993	0.0244626	0.785048	2.38284e-09	5.43397e-08	0.360147	0.0144557	0.14012	-0.501633	0.00453967	0.122501	0.857167	0.00198276	0.0181782
Entpd5	0.49425	0.0011071	0.0158487	0.351294	0.00971413	0.0316856	0.428606	0.00577998	0.0755957	0.015355	0.955593	0.99663	0.859429	0.000520161	0.00692932
Rab11fip1	0.572091	8.23805e-05	0.00195633	0.961537	7.61557e-12	2.68835e-10	0.137453	0.404257	0.775072	-0.981995	0.00154188	0.0637228	0.873278	7.63e-05	0.00158574
Ankrd13d	0.582622	0.000775707	0.0118474	0.876759	3.21612e-08	5.72846e-07	0.402693	0.0505986	0.301191	-0.520299	0.135253	0.624442	0.878198	4.76e-06	0.00017924
Gm2a	0.825868	4.70128e-07	2.35554e-05	1.22666	6.2249e-11	1.90123e-09	0.419954	0.0281859	0.211721	-0.892897	0.0120512	0.206518	0.878405	0.00585393	0.0396749
Bahd1	0.482675	0.00108239	0.0155269	-0.266534	0.56834	NA	0.560078	0.00146157	0.0290832	0.879703	0.0575321	0.446147	0.880972	0.000926898	0.0104961
Nudt18	0.522014	0.000633244	0.0101268	0.538934	2.26334e-06	2.60659e-05	0.165622	0.367986	0.748712	-0.450553	0.117364	0.58874	0.889784	0.000129778	0.00245368
Cdc25b	0.424654	0.00330014	0.0357725	0.339899	0.00369811	0.0144123	0.368133	0.0383498	0.255891	-0.0400591	0.860189	0.981273	0.893645	0.00100253	0.0110678
Pim2	0.508447	0.00214679	0.026093	0.559639	1.69429e-05	0.000150753	0.220757	0.31583	NA	-0.49778	0.201681	0.710677	0.89477	1.4e-06	7.02e-05
Cep135	0.542156	0.000289354	0.0053942	0.38721	0.0062307	0.022115	0.531407	0.000937856	0.0207685	0.0807887	0.739691	0.957479	0.896115	2.99e-05	0.000774059
Myo1c	0.461069	0.00332644	0.0359457	0.423044	0.0678806	0.148454	0.529436	0.00392953	0.0581045	0.0538478	0.865523	0.981654	0.904626	6.21e-05	0.00135521
Tob1	0.540912	0.0031184	0.0344401	0.551947	3.53541e-06	3.86089e-05	0.629766	0.00268284	0.0444596	0.0928796	0.844368	0.978554	0.905123	0.00648193	0.0429727
Snx8	0.421585	0.00313792	0.0345813	0.64833	3.46047e-07	4.93516e-06	0.269075	0.101192	0.437328	-0.47038	0.0738758	0.491249	0.909115	1.9e-07	1.51e-05
Pde7a	0.696465	6.19627e-06	0.000220173	0.443931	0.000383686	0.00219381	0.72561	1.94163e-05	0.000898504	0.240079	0.532354	0.899484	0.909422	1.59e-07	1.35e-05
Manea	0.563083	0.000294228	0.00545713	0.363568	0.000590962	0.00316012	0.831139	3.14836e-06	0.000188212	0.461046	0.0541145	0.437111	0.924345	0.000701095	0.00865317
Cblb	0.471662	0.00158536	0.0208916	0.50651	3.70004e-05	0.000297683	0.397325	0.0219157	0.181273	-0.164872	0.628892	0.93001	0.924809	0.00269502	0.0230213
Nt5dc1	0.403557	0.00374297	0.038937	0.245995	0.0187468	0.0538248	0.433392	0.00589933	0.0766482	0.134346	0.544741	0.902137	0.938174	0.00397091	0.0304
Oxsm	0.482407	0.00153143	0.0203155	0.427471	0.000431361	0.0024057	0.576731	0.00113745	0.0240784	0.113506	0.669136	0.940019	0.942943	0.00231057	0.0205533
Synj1	0.563257	0.000417832	0.0072932	0.64478	3.2031e-06	3.5383e-05	0.507571	0.00344513	0.0526753	-0.180798	0.552032	0.903873	0.943714	0.000143833	0.00264318
Tmod3	0.574864	4.30177e-05	0.00115451	0.569176	1.39578e-06	1.71136e-05	0.430873	0.00713851	0.0874514	-0.240237	0.402002	0.847276	0.968045	0.000234536	0.00385219
Crlf2	0.57738	0.000175044	0.00357506	0.749222	1.61854e-06	1.94925e-05	0.585604	0.000888693	0.0199013	-0.214301	0.360833	0.826517	0.968877	4.27e-05	0.00101481
Actg1	0.535408	0.00185655	0.0235089	0.542648	1.34095e-06	1.65378e-05	0.462338	0.0164278	0.152143	-0.144252	0.680576	0.943748	0.972438	0.00355128	0.0283436
Jhdm1d	0.879132	3.14893e-08	2.11891e-06	1.09214	7.73025e-10	1.94615e-08	0.818212	4.66905e-06	0.0002633	-0.270307	0.357006	0.825338	0.973014	0.000998584	0.0110678
Slain1	0.770147	5.15368e-07	2.57296e-05	1.24342	6.87973e-19	5.68044e-17	0.564414	0.00100061	0.0217773	-0.741992	0.00102613	0.0480204	0.977269	1.65e-05	0.000484886
Zfp251	0.588153	0.000659909	0.010493	0.751808	2.09681e-06	2.43495e-05	0.314555	0.0762877	0.378433	-0.509043	0.119641	0.595488	0.985327	0.000849195	0.00993348
Ccng2	0.940339	1.29664e-08	9.65823e-07	0.864843	1.44985e-09	3.46223e-08	1.01853	5.79277e-08	5.45186e-06	0.174911	0.536333	0.899704	0.985548	0.00537912	0.0374513
Plch1	0.548148	0.00380268	0.0392352	0.279449	0.614356	NA	0.616802	0.0014715	0.029239	0.193446	0.729912	0.954674	0.986162	0.000840996	0.00987721
Tspan17	0.791976	8.00397e-06	0.000274599	1.25193	7.53163e-14	3.46135e-12	0.200983	0.335249	0.728697	-1.12236	8.80615e-05	0.00861412	0.986798	0.00353314	0.0282341
Mgat1	0.528562	0.000133914	0.00287115	0.288349	0.0709228	0.153556	0.606202	0.000164905	0.00512714	0.289789	0.219803	0.727883	0.988349	0.000192451	0.00330115
Ublcp1	0.715173	9.54487e-07	4.35903e-05	0.569512	5.50904e-08	9.22243e-07	0.890044	9.99092e-08	9.02573e-06	0.280543	0.218364	0.726082	1.00741	0.000236942	0.0038867
Plekho1	0.446613	0.00362064	0.0381354	0.559992	4.12065e-05	0.000326403	0.305024	0.107616	0.451227	-0.309158	0.300079	0.794459	1.01314	5.64e-05	0.00125942
Bid	0.462835	0.00208331	0.0255219	0.384075	0.00163808	0.00739563	0.445364	0.0136167	0.136032	0.0329104	0.919574	0.990663	1.01457	1.08e-05	0.0003478
Neu1	0.71786	9.84788e-07	4.48272e-05	0.899307	2.59293e-09	5.88878e-08	0.428702	0.0186296	0.164131	-0.582327	0.078764	0.505075	1.01889	4.63e-05	0.00108642
Naaa	0.864444	5.9278e-08	3.73613e-06	1.00984	2.06327e-19	1.76337e-17	0.657162	0.000487636	0.0122604	-0.392596	0.0919264	0.536303	1.02545	4.42e-05	0.00104591
Tnfaip8	0.612116	4.47501e-06	0.000166664	0.603374	0.0002365	0.00145468	0.63724	9.64699e-06	0.000501392	-0.0363269	0.9113	0.988635	1.02588	6.22e-07	3.81e-05
Dennd1c	0.530764	0.00141217	0.0191344	0.33711	0.021588	0.0600262	0.683722	0.000139483	0.00446635	0.328511	0.324126	0.805859	1.04223	5.4e-06	0.000197894
Smurf1	0.423859	0.00516734	0.0492985	0.842293	3.41329e-09	7.49668e-08	0.266419	0.107983	0.451554	-0.659237	0.00521979	0.131767	1.0607	3.38e-07	2.29e-05
Suox	0.553385	0.00391402	0.040146	0.691957	0.000158403	0.00104067	0.140489	0.561059	NA	-0.612024	0.0600589	0.453857	1.06811	0.00284443	0.0239292
Ikzf1	0.636656	3.12346e-05	0.000876537	-0.758266	0.158703	NA	0.703306	7.13954e-05	0.00261702	1.60055	0.00052066	0.0304462	1.07315	0.00032044	0.0048168
Icam5	-0.542203	0.00112653	0.0160445	-0.357069	0.176758	0.303945	-0.48871	0.0107002	0.116258	-0.237851	0.59385	0.91705	1.08846	0.005293	0.0369931
Limd2	0.82168	1.89913e-07	1.05812e-05	0.755	6.68144e-05	0.000499212	0.88285	2.06441e-06	0.000130706	0.114839	0.763178	0.963273	1.09136	1.1e-06	5.89e-05
Cnn2	0.529777	0.00207742	0.0254757	0.611648	0.00214287	0.00922171	0.45022	0.018845	0.16509	-0.220468	0.457459	0.873542	1.09578	3.48e-05	0.000871137
Nsf	0.380503	0.00520283	0.0494339	0.29858	0.00993886	0.0322459	0.282023	0.0499788	0.298779	-0.113867	0.667554	0.939565	1.10241	0.000824093	0.00976516
Foxo1	0.706155	7.5889e-08	4.69803e-06	0.501519	4.81226e-06	5.07422e-05	0.744264	4.09246e-07	3.09804e-05	0.147449	0.619024	0.927342	1.10409	1.76e-09	3.31e-07
Foxo1	0.706155	7.5889e-08	4.69803e-06	0.501519	4.81226e-06	5.07422e-05	0.744264	4.09246e-07	3.09804e-05	0.147449	0.619024	0.927342	1.10409	1.76e-09	3.31e-07
Tnip1	0.477885	0.00120127	0.0169185	0.41576	0.507432	NA	0.547874	0.00172783	0.0327442	0.087006	0.888518	0.982982	1.11579	1.94e-09	3.49e-07
Ptprcap	0.477402	0.000588045	0.00957997	0.242167	0.328174	0.476441	0.618792	0.000121643	0.00399392	0.321625	0.522226	0.895423	1.12241	4.7e-06	0.0001784
Ankrd50	0.607555	0.000205683	0.00406377	0.883481	3.1462e-09	6.99849e-08	0.236998	0.167988	0.565467	-0.720336	0.00197422	0.074755	1.12377	0.00377814	0.0295084
Dock8	0.51347	7.29701e-05	0.00176458	0.287136	0.590184	NA	0.583724	2.80366e-05	0.0012128	-0.00280314	0.995776	1	1.12398	0.00128364	0.0132432
4931406P16Rik	0.615145	2.65261e-05	0.000761819	0.763857	1.59591e-11	5.39892e-10	0.376009	0.0124313	0.128454	-0.479338	0.0527165	0.432766	1.12587	3.81e-05	0.000929094
Adam9	0.62829	1.51338e-05	0.00046918	0.59477	8.31498e-07	1.08214e-05	0.489306	0.00147452	0.0292572	-0.185592	0.410833	0.84958	1.1378	1.55e-05	0.000463009
Vamp1	0.415278	0.00367546	0.0384933	0.425018	0.000189278	0.00120848	0.443449	0.00681802	0.0849346	-0.0235899	0.931514	0.99276	1.13805	4.7e-05	0.0010954
Fgd6	0.47452	0.00133058	0.0183138	0.603363	7.74662e-05	0.000565358	0.310274	0.0482756	0.292741	-0.378293	0.13203	0.621354	1.14274	0.000350653	0.00514372
Loxl3	-0.936092	3.55388e-09	3.07466e-07	-0.696205	0.113842	NA	-0.857882	2.17312e-06	0.000135998	-0.303261	0.438942	0.863405	1.15398	0.00383415	0.0297456
Aph1b	0.69177	6.36013e-05	0.00158197	0.755758	8.61119e-05	0.000618267	0.391883	0.0682726	0.356257	-0.388103	0.203226	0.711393	1.15737	0.00277875	0.0235413
Sv2a	0.488485	0.00129902	0.0179505	0.764911	4.0299e-07	5.6657e-06	0.253533	0.147765	0.530194	-0.607536	0.00987945	0.188694	1.15856	6.07e-06	0.000216481
Stat5b	0.52502	0.000319323	0.00587563	0.804052	1.48599e-11	5.08e-10	0.376405	0.0136252	0.136032	-0.470728	0.0491917	0.419693	1.15878	0.000141452	0.00261903
Ube2h	0.808356	6.02864e-10	5.83145e-08	0.540958	2.70834e-06	3.0541e-05	0.817443	4.96086e-08	4.79859e-06	0.180522	0.543476	0.902071	1.16206	1.12e-07	1.02e-05
Ccpg1	0.515678	0.000415958	0.00726961	0.466147	0.000412812	0.00233026	0.268619	0.111761	0.459481	-0.252005	0.345569	0.817686	1.19948	6.42e-05	0.0013919
Pkig	0.743401	3.81825e-08	2.48526e-06	0.590083	9.32463e-06	8.98614e-05	0.748395	1.85491e-06	0.000119616	0.150468	0.608449	0.923482	1.20665	1.08e-05	0.0003478
Apitd1	0.555812	0.000798327	0.0121139	0.295885	0.00946434	0.0310475	0.745657	9.9606e-05	0.00340052	0.467932	0.0873283	0.526136	1.20846	0.000252814	0.00406349
Hip1r	0.81469	4.68717e-09	3.90944e-07	1.18021	1.89948e-12	7.40266e-11	0.750094	9.46558e-06	0.000493806	-0.532408	0.0783932	0.504909	1.21266	1.39e-05	0.000425349
Crip1	0.771023	8.23689e-06	0.000279833	0.843283	4.37946e-14	2.06131e-12	0.675584	0.000385261	0.0100492	-0.171811	0.549554	0.902837	1.22617	2.98e-06	0.000121606
Rom1	0.607623	0.00050966	0.00850186	0.806246	6.67508e-05	0.00049912	0.602721	0.00204765	0.0368234	-0.237952	0.33485	0.813481	1.23923	0.00103354	0.0113219
Phf2	0.5134	0.000188765	0.00380507	0.4429	0.00952799	0.0311933	0.565988	0.000449078	0.0114985	0.0702243	0.769572	0.965	1.24661	0.00137063	0.0138715
Tmed8	0.49777	0.000773226	0.0118355	0.432337	0.00158855	0.00723237	0.351493	0.0291448	0.216395	-0.145229	0.542296	0.901684	1.24917	0.00267557	0.0228858
Rltpr	0.608731	0.000381919	0.00680331	-0.0761084	0.671878	0.778001	0.784156	6.0773e-05	0.00231204	0.859229	0.0130682	0.214451	1.25783	8.38e-10	2.02e-07
Slc37a3	0.960273	9.29427e-11	1.10972e-08	1.90902	1.26921e-27	2.57623e-25	0.278547	0.0960599	0.4262	-1.7865	2.14532e-10	3.35767e-07	1.26617	0.00318059	0.0260698
Rhoh	0.488153	0.000744909	0.0115544	-0.331041	0.0473028	0.111971	0.745282	1.00758e-06	6.81289e-05	1.00613	0.0658532	0.469913	1.26958	1.65e-06	7.79e-05
2700081O15Rik	0.51114	0.00163358	0.0213253	0.843662	1.07854e-05	0.00010222	0.503342	0.00558792	0.0738464	-0.395635	0.171094	0.67418	1.29049	6.91e-07	4.14e-05
Pard6b	1.14731	8.74565e-10	8.34371e-08	2.1563	3.41e-44	2.37312e-41	0.372781	0.0480089	0.292271	-1.86624	9.27915e-10	1.09997e-06	1.3086	0.00255078	0.0220849
Runx3	0.494299	0.00220077	0.0265177	-0.302588	0.206236	0.34266	0.572471	0.00209656	0.0374285	0.841242	0.0196233	0.266295	1.32397	2.96e-05	0.000769215
Map4k2	0.942887	1.23744e-08	9.36757e-07	0.913148	2.92609e-10	8.0991e-09	0.997336	8.87818e-08	8.1358e-06	0.109268	0.7091	0.950822	1.32775	5.17e-09	7.77e-07
Dhx40	0.661889	3.51593e-05	0.000965944	0.726595	5.56046e-06	5.75724e-05	0.48867	0.0126302	0.129721	-0.25553	0.368761	0.828852	1.32813	1.01e-08	1.33e-06
Prr5	0.599386	0.000454694	0.00780941	-0.655151	0.286108	NA	0.671112	0.000662306	0.015851	1.48971	0.00853683	0.173242	1.3351	1.88e-06	8.49e-05
Icam1	0.598451	0.000111123	0.00248707	0.575493	1.13684e-09	2.75528e-08	0.61603	0.000540107	0.0134103	0.0189413	0.940634	0.994509	1.34369	1.5e-13	2.3e-10
Samd10	0.630435	4.94143e-05	0.00129622	0.841705	4.94602e-10	1.28504e-08	0.23285	0.213825	0.622603	-0.704629	0.00489584	0.12677	1.35327	2.02e-05	0.000568963
Peli1	0.6281	2.86841e-05	0.000808788	0.317473	0.00229197	0.00974289	0.80635	1.54139e-05	0.000758656	0.450437	0.154038	0.654717	1.36829	3.2e-08	3.54e-06
Rab39	1.27383	1.97726e-13	3.12968e-11	1.78747	7.0254e-31	1.84996e-28	0.981351	4.06695e-07	3.09555e-05	-0.793306	0.00175121	0.0689105	1.38501	0.00391912	0.0301846
St8sia4	0.64852	0.000414711	0.00725693	0.596487	2.88388e-08	5.21292e-07	0.686498	0.00222912	0.0388141	0.134647	0.754269	0.960383	1.39111	0.000119833	0.00229283
Sp4	0.458413	0.00407794	0.0414611	0.298806	0.0157796	0.0468579	0.431696	0.026156	0.202404	0.103108	0.753931	0.960383	1.39292	0.000743386	0.00905257
Irf1	0.989764	1.23908e-09	1.15061e-07	0.948525	6.36629e-15	3.38944e-13	1.15806	2.55429e-10	3.99761e-08	0.212641	0.559033	0.907009	1.40295	4.14e-09	6.68e-07
Tpmt	0.483404	0.0026744	0.0304842	0.200294	0.63044	NA	0.555919	0.00312879	0.0491885	0.303692	0.534311	0.899704	1.43774	0.00141959	0.0142316
Kctd7	0.757984	1.01788e-06	4.60327e-05	0.859583	1.05789e-09	2.5897e-08	0.450644	0.0219129	0.181273	-0.471101	0.0440922	0.400722	1.50471	0.000958666	0.0107603
Abcb10	0.597579	0.000347205	0.00625642	1.27576	5.2156e-18	3.81916e-16	0.0698973	0.672495	0.90431	-1.30236	2.7687e-08	1.69565e-05	1.50553	0.00758176	0.0484665
Cpeb2	0.462067	0.00416045	0.0420951	0.223895	0.0672983	0.147412	0.572896	0.00179833	0.033832	0.319626	0.292259	0.789883	1.51104	0.00108277	0.0117005
Stk17b	0.685568	8.69222e-05	0.00204172	0.505836	2.67939e-08	4.88862e-07	0.83388	0.000207582	0.00610002	0.41178	0.338602	0.814762	1.51412	1.32e-06	6.77e-05
Magi3	0.52843	0.00164186	0.0213934	0.498829	0.000292667	0.00174454	0.492381	0.0100397	0.111327	-0.0675516	0.854328	0.98025	1.54356	4.14e-06	0.000160413
Rnf145	0.417842	0.000928058	0.0136793	0.292019	0.00793648	0.026952	0.44266	0.0020117	0.0365808	0.074791	0.754786	0.960383	1.5475	5.51e-10	1.42e-07
Sp100	0.388187	0.00314272	0.0345813	0.460221	0.0556548	0.127288	0.455077	0.00177189	0.0333973	-0.0983204	0.84674	0.9786	1.56869	6.86e-06	0.000237901
Kif21b	0.443031	0.00318345	0.034733	1.00246	3.38691e-07	4.84563e-06	0.443159	0.0117375	0.123955	-0.635502	0.0127486	0.212613	1.5809	0.00133775	0.0136798
Pdlim7	0.650678	1.57161e-05	0.000485386	0.803866	3.07477e-11	9.95265e-10	0.641902	0.000299868	0.00807857	-0.23148	0.553772	0.904608	1.58297	3.92e-12	2.94e-09
Dusp5	0.951329	1.79444e-10	2.0157e-08	0.776226	2.60174e-14	1.26744e-12	1.00343	1.13674e-08	1.25985e-06	0.17832	0.617883	0.92699	1.60916	2.3e-07	1.75e-05
Plekha2	0.846992	2.46997e-10	2.68783e-08	0.310261	0.00631376	0.022361	0.947323	3.14049e-10	4.80702e-08	0.617664	0.0343811	0.351701	1.65259	6.78e-07	4.08e-05
Cerk	0.981207	2.03672e-08	1.42561e-06	0.634168	0.0001292	0.000878432	1.07377	1.02105e-07	9.11676e-06	0.485471	0.103445	0.562394	1.66148	5.9e-09	8.65e-07
Gopc	0.707652	4.77324e-06	0.000177297	0.33377	0.00964019	0.0314971	0.833266	2.35298e-06	0.000144382	0.480588	0.0972415	0.548482	1.68065	3.14e-07	2.19e-05
Tpst1	1.00183	9.32138e-11	1.10972e-08	0.437202	0.507786	NA	1.06512	5.99105e-09	7.19391e-07	0.41559	0.538109	0.900079	1.68924	7.55e-05	0.00157675
Arhgap25	0.476033	0.00067436	0.0106862	-0.223272	0.308523	0.456829	0.612257	9.73045e-05	0.00335484	0.742099	0.145784	0.644539	1.68952	8.78e-07	4.91e-05
Tnfrsf26	0.559019	0.00176796	0.0226133	0.135038	0.647901	0.760938	0.706297	0.000290756	0.00792552	0.561889	0.327197	0.807586	1.69187	1.91e-10	6.58e-08
Lax1	0.621454	5.75594e-05	0.00146037	-0.374513	0.0571089	0.12967	1.14745	3.57845e-10	5.36028e-08	1.48544	0.0832568	0.518371	1.69599	1.02e-09	2.37e-07
Plekhh3	0.648507	0.000203436	0.00403656	0.835364	6.14483e-06	6.26246e-05	0.521524	0.00838364	0.0973942	-0.352025	0.42664	0.858909	1.73831	6.24e-05	0.0013595
Rell2	0.498662	0.00376747	0.0390068	0.233107	0.326323	0.474608	0.703135	0.00030488	0.00816669	0.469967	0.189564	0.694097	1.76272	0.00306201	0.0253749
BC106179	0.979087	1.15186e-11	1.51361e-09	1.01608	4.65044e-17	3.12477e-15	0.691971	0.000122645	0.00401015	-0.398585	0.120575	0.59685	1.76402	7.12e-06	0.000246118
Ap3m2	1.07539	2.50923e-10	2.70939e-08	1.49345	1.46336e-26	2.64028e-24	0.441113	0.0249687	0.195834	-1.10757	5.30693e-06	0.0011581	1.76699	4.87e-11	2.14e-08
Ctnnal1	0.819009	3.02537e-07	1.5902e-05	1.42636	7.98465e-19	6.53735e-17	0.392064	0.0162683	0.151066	-1.12577	9.72188e-07	0.000297701	1.80991	1.24e-06	6.46e-05
Slc14a1	0.54379	0.000218368	0.00426001	0.599214	0.00268111	0.011111	0.564805	0.000603667	0.0146489	-0.0839562	0.873043	0.982243	1.81568	2.15e-05	0.000593571
Arid5a	0.865706	5.99192e-09	4.79663e-07	0.841296	1.49245e-21	1.58054e-19	0.77788	7.45692e-05	0.00271904	-0.0694739	0.798885	0.970843	1.83588	1.54e-08	1.87e-06
4930427A07Rik	0.831548	7.06922e-07	3.39542e-05	0.4962	0.000292934	0.00174454	0.959673	8.0311e-07	5.48359e-05	0.538372	0.129319	0.615324	1.84118	4.44e-11	2.03e-08
Gm10116	-0.558921	0.00129769	0.0179505	-0.71887	0.000113028	0.00078324	-0.267785	0.284443	NA	0.343411	0.450494	0.868919	1.86887	0.00374971	0.0293222
Smpd1	1.01874	3.90696e-08	2.53116e-06	1.3841	1.93904e-13	8.66607e-12	0.0502443	0.848899	NA	-1.4046	1.57297e-05	0.00266951	1.8702	0.000340601	0.00502515
Gm10767	-0.465703	0.00399949	0.0408722	-0.129124	0.336858	0.485216	-0.670935	0.000265919	0.00739318	-0.650908	0.11725	0.58871	1.89649	0.0055527	0.0382076
Zbtb4	0.74647	1.0375e-06	4.63183e-05	1.19791	5.72903e-08	9.57342e-07	0.668885	9.31954e-05	0.00326982	-0.614343	0.0122644	0.208351	1.92314	8.02e-07	4.61e-05
Agfg2	0.882715	3.99779e-10	4.12483e-08	0.547092	1.06947e-06	1.34623e-05	0.977916	1.28337e-09	1.80566e-07	0.425478	0.133024	0.621689	1.92339	2.66e-13	2.82e-10
Lig4	0.77816	1.25086e-06	5.46181e-05	-0.162309	0.484129	0.62343	0.953273	1.41541e-06	9.34375e-05	1.23008	0.173727	0.676746	1.93198	3.06e-07	2.18e-05
Slpi	0.492136	0.00198516	0.024755	-0.65736	0.273649	NA	0.585615	0.000405082	0.0105072	1.38419	0.0125034	0.209671	1.95352	5.6e-06	0.000203541
Cpne5	0.460654	0.00499393	0.0481179	0.584501	0.297342	NA	0.528857	0.00544521	0.0727891	-0.302299	0.583478	0.915005	1.96544	3.23e-08	3.54e-06
Agpat9	0.743983	8.9835e-08	5.41693e-06	-0.0703269	0.793975	0.867408	0.834211	1.83156e-08	1.93271e-06	0.896576	0.000809021	0.0405547	2.03027	1.1e-13	2e-10
Adc	0.507535	0.0019029	0.0239869	0.773864	5.77043e-06	5.94935e-05	0.269751	0.136816	0.508869	-0.57805	0.03608	0.362481	2.09852	3.47e-05	0.000871137
Trp53inp2	0.856144	3.45969e-08	2.27312e-06	0.408921	0.457619	NA	0.92203	4.26176e-07	3.17445e-05	0.48234	0.336621	0.813793	2.09866	0.000839542	0.00987487
Rnd2	0.627885	0.000154808	0.00322803	-0.407986	0.16026	0.283635	0.771385	5.57732e-05	0.00217002	1.22719	0.00256453	0.0866542	2.13016	0.00111689	0.01197
Otub2	0.964098	5.95845e-11	7.54503e-09	1.43987	3.82796e-20	3.62095e-18	0.787994	8.9355e-06	0.00046967	-0.693139	0.0186154	0.259878	2.13447	1.28e-09	2.81e-07
Tmem121	1.07868	1.47531e-09	1.3609e-07	0.882674	3.10471e-10	8.49695e-09	1.33867	7.72103e-10	1.09741e-07	0.582023	0.105877	0.56556	2.16716	7.15e-12	4.8e-09
Tubb2a	1.08719	1.57279e-10	1.79204e-08	1.3729	1.04983e-29	2.49477e-27	0.406119	0.0590838	0.330646	-0.99605	5.46534e-05	0.00630399	2.1726	4.14e-05	0.000991929
Akap12	1.05802	2.8726e-12	4.00124e-10	0.863155	1.16177e-08	2.29597e-07	1.13288	2.48552e-11	4.87616e-09	0.275833	0.236545	0.741756	2.32122	2.2e-06	9.47e-05
Ltb	0.752129	8.46764e-07	3.95791e-05	0.529688	0.00420142	0.0159962	0.883678	5.16657e-07	3.70955e-05	0.33685	0.229533	0.735924	2.34335	2.88e-06	0.000117838
Slamf7	0.849839	6.10176e-07	2.95758e-05	0.917972	0.169746	NA	0.902561	3.95435e-07	3.0431e-05	-0.617529	0.564733	0.907746	2.36009	2.54e-05	0.000681489
Lmcd1	0.867486	1.93179e-08	1.35898e-06	1.25936	3.64873e-10	9.84753e-09	0.697109	6.31198e-05	0.00238264	-0.598662	0.0595682	0.45264	2.38515	2.52e-10	7.48e-08
Stx11	0.851663	4.21059e-06	0.000158084	1.48683	2.67549e-16	1.58947e-14	0.140771	0.471374	0.812293	-1.42048	2.45731e-07	9.35506e-05	2.38986	6.49e-09	9.3e-07
Slc46a3	0.716852	7.68909e-07	3.66786e-05	1.41713	1.88495e-19	1.65451e-17	0.248906	0.126287	0.488686	-1.25497	1.69366e-05	0.0028067	2.50962	9.66e-06	0.000320368
Itgb3	0.503167	0.00049543	0.00832654	0.883179	5.3228e-05	0.000408991	0.430043	0.00665319	0.0835997	-0.519873	0.0420434	0.390535	2.67339	4.87e-07	3.15e-05
5330426P16Rik	0.6212	0.000159879	0.00331392	0.525246	0.000334451	0.001955	0.678245	0.00171095	0.0325127	0.174214	0.578907	0.913433	2.70504	0.000245818	0.00398619
Htra4	0.848432	2.38443e-07	1.30246e-05	1.18543	4.2429e-12	1.58385e-10	0.735953	5.65748e-05	0.00218897	-0.475092	0.0852389	0.522678	2.72846	0.000901197	0.0102965
Fcgr2b	0.623754	0.000335133	0.00609409	0.323892	0.549007	NA	0.698319	0.000143419	0.00456473	0.418836	0.465107	0.876163	2.77034	1.78e-06	8.24e-05
Tubb2b	1.19744	7.24013e-11	8.92458e-09	1.86291	5.40885e-21	5.5472e-19	0.404683	0.0764883	NA	-1.51171	0.000169218	0.0143591	3.19867	2.04e-10	6.68e-08
Arvcf	1.10095	2.02768e-14	3.53045e-12	0.256494	0.64966	NA	1.1627	1.39215e-11	2.77017e-09	0.548107	0.293708	0.791037	3.27033	2.21e-13	2.77e-10
Gm10282	0.594972	0.00116516	0.0165101	0.612175	1.38074e-05	0.000125607	0.0416735	0.896056	NA	-0.735157	0.167468	0.670537	3.6472	6.56e-06	0.000229509
Crip2	0.550954	0.00450429	0.0446232	1.07085	9.14345e-08	1.47004e-06	0.365335	0.109323	0.454141	-0.780108	0.0573136	0.44554	3.7039	5.5e-12	3.9e-09
Cyp4f13	-0.893966	9.97854e-09	7.72173e-07	-2.00745	8.53195e-23	1.01374e-20	-0.283357	0.0995092	0.434639	1.55209	0.00766755	0.16386	-0.983373	0.00805018	0.0505842
Ppargc1b	-0.590166	1.96746e-05	0.000589349	-1.15945	7.53666e-13	3.12467e-11	-0.475314	0.00290218	0.0467876	0.588411	0.0208041	0.272349	-1.06248	0.00809135	0.050718
Rgs2	0.395448	0.00368296	0.0385424	0.202735	0.0317806	0.0818067	0.750082	0.00097561	0.0214004	0.611078	0.101891	0.559982	0.957353	0.00817955	0.0511223
Lrrc33	-0.477427	0.000239765	0.00460012	-0.2884	0.00233976	0.00990712	-0.622362	1.70964e-05	0.000818337	-0.441613	0.136063	0.626904	-0.53571	0.00819724	0.0512056
Dusp4	-0.881213	1.6296e-08	1.18223e-06	-1.07282	3.61132e-23	4.4538e-21	-0.767804	2.51889e-05	0.00112815	0.137893	0.600595	0.920268	-1.23095	0.00833767	0.0518489
Fads2	-0.870301	1.58246e-10	1.79204e-08	-0.902545	1.75274e-10	5.03744e-09	-0.899937	7.16074e-08	6.60542e-06	-0.193051	0.575398	0.91128	-0.974958	0.00838121	0.0519834
Foxo4	0.736726	1.49431e-05	0.000465643	-0.605847	0.0430563	0.10381	1.15228	6.79219e-10	1.00647e-07	1.8517	7.58355e-08	3.68351e-05	0.436091	0.00865796	0.0532753
Arid4a	0.423607	0.00269035	0.030641	0.353545	0.00492448	0.01825	0.468822	0.00283315	0.0461555	0.0530889	0.793117	0.968601	0.72158	0.00882722	0.0540821
Mkrn1	0.619352	3.21931e-05	0.000896369	0.54234	1.14019e-05	0.000107332	0.656941	8.60709e-05	0.00305059	0.0904617	0.648384	0.934861	0.482531	0.00909588	0.0552155
Tsta3	-0.889951	1.70364e-05	0.000515868	-1.42696	2.21935e-11	7.30512e-10	-0.542469	0.0185969	0.163947	0.700765	0.0904042	0.531705	-0.448823	0.00933718	0.0561966
Mettl7a1	-0.594678	0.000600531	0.00970393	-1.36591	5.44599e-17	3.60954e-15	0.216751	0.275148	0.682065	1.52234	3.7696e-05	0.0050093	0.690917	0.00938894	0.0563914
Pa2g4	-0.623421	7.24978e-05	0.00175621	-0.812627	1.89268e-10	5.39192e-09	-0.495142	0.00413976	0.0600108	0.203013	0.369825	0.82954	-0.484139	0.00942035	0.0565221
Inf2	-0.609475	2.85455e-05	0.000808788	0.18695	0.194795	0.328571	-0.804457	5.71952e-06	0.000317729	-1.18385	5.62512e-06	0.00120054	-0.650464	0.00951467	0.0569809
Thtpa	-0.527593	0.00141561	0.0191437	-0.871945	1.87446e-10	5.37142e-09	-0.381576	0.0325031	0.231342	0.374583	0.276452	0.776819	-0.940617	0.00957317	0.0571933
Ltk	0.870432	1.49527e-07	8.64218e-06	0.0962721	0.85705	NA	0.935778	1.30777e-06	8.71575e-05	0.832946	0.147462	0.645691	0.96079	0.00964659	0.0574206
Rimbp3	0.548021	0.000737236	0.011461	0.680254	0.0448021	0.107312	0.619685	0.00102891	0.0222888	-0.123753	0.804126	0.970843	2.03344	0.00972087	0.057766
Mgrn1	-0.4524	0.000858736	0.0128617	0.291715	0.469319	NA	-0.397286	0.0108464	0.117297	-0.862248	0.0194723	0.265569	-1.2758	0.00972273	0.057766
Nynrin	-0.598313	0.000844705	0.0127062	-1.49727	3.26439e-06	3.59785e-05	-0.445357	0.0215043	0.179362	1.01782	0.00434565	0.119091	-1.07124	0.00989384	0.0585103
Dgka	0.444855	0.00354479	0.0374908	0.527239	0.000738841	0.00380073	0.274645	0.0988902	0.433382	-0.33084	0.224617	0.731241	0.419624	0.0099333	0.0587164
Ddit3	-0.501497	0.000683272	0.0107662	-0.387715	0.213687	0.350716	-0.605414	8.12067e-05	0.00293038	-0.260585	0.551324	0.903356	-0.872551	0.00994883	0.058781
Lgals9	-1.32604	1.64979e-19	4.88935e-17	-1.4103	1.8037e-14	8.96606e-13	-1.27351	1.22295e-16	6.55173e-14	-0.0320415	0.959991	0.998081	-0.614518	0.0100037	0.0590492
9430038I01Rik	0.836147	1.82867e-07	1.03124e-05	0.769432	7.32354e-09	1.49902e-07	0.710251	2.72661e-05	0.00119056	-0.0948687	0.672618	0.941472	0.91728	0.0100755	0.0593828
Slc35f5	0.443637	0.00490849	0.0476449	0.591108	0.00301119	0.0122089	0.217173	0.229029	0.63982	-0.478211	0.0958325	0.545615	0.544467	0.0101455	0.0595844
Nop10	-0.544911	0.000808505	0.0122277	-0.745457	1.112e-06	1.39617e-05	0.149608	0.493921	NA	0.849896	0.0502071	0.423667	-0.60485	0.0101678	0.0596603
Dnajb12	-0.492004	0.000998169	0.0145434	-0.530908	1.83737e-05	0.00016113	-0.448039	0.012619	0.129721	-0.027752	0.914845	0.98934	-0.355051	0.0102521	0.0601229
Lhx9	-0.510837	0.000276691	0.00521519	-0.27581	0.563567	NA	-0.434852	0.00624747	0.0800562	-0.279024	0.513757	0.893761	-1.55026	0.0103559	0.0603752
Agpat2	-0.602276	0.000855583	0.0128282	-0.699174	1.33885e-06	1.65329e-05	-0.660065	0.00105319	0.0226664	-0.123905	0.698275	0.947576	-0.449158	0.0103887	0.0604205
Heatr1	-0.401636	0.00377552	0.0390161	-0.644132	3.45621e-05	0.000280849	-0.302873	0.0513194	0.303536	0.23659	0.431319	0.861537	-0.579466	0.010392	0.0604205
Coq10b	0.452553	0.00526887	0.0498574	0.547027	0.000137041	0.000925287	0.158049	0.396312	0.769155	-0.484516	0.111481	0.576901	1.36487	0.0104156	0.0604477
Elk3	-0.447002	0.00145666	0.0195282	-0.559368	4.00724e-05	0.000318715	-0.422528	0.00944988	0.106667	0.0475678	0.856865	0.980885	-0.588079	0.0104517	0.0605477
Emp3	-0.498912	0.00165597	0.021557	-0.533026	0.000372106	0.00213637	-0.432674	0.0192661	0.166815	-0.0289235	0.95064	0.996006	-0.458939	0.0106113	0.0612769
Tcirg1	-0.560429	0.000194084	0.00388979	-0.29296	0.0168485	0.0493253	-0.664535	0.000221199	0.00636586	-0.511737	0.018976	0.262312	-0.652015	0.010638	0.0613196
Mars2	-0.492244	0.00220914	0.0265497	-0.596802	3.03234e-07	4.39645e-06	-0.532781	0.00938802	0.106314	-0.136857	0.692726	0.94644	-0.60527	0.011288	0.063997
Cort	0.679999	0.000289674	0.0053942	0.761597	0.000426702	0.00238929	0.630288	0.00272535	0.0448716	-0.128905	0.724997	0.95348	1.48298	0.01146	0.064415
Hcfc2	0.466796	0.00310047	0.0343022	0.178735	0.79122	NA	0.536318	0.00359473	0.0542481	0.0136072	0.983281	1	0.422495	0.0116685	0.0651132
Atg16l2	-0.523743	0.000629417	0.0101004	-0.466408	0.000947474	0.00470981	-0.82339	7.69088e-06	0.000413615	-0.520126	0.0598659	0.453857	-0.920483	0.0117193	0.0652253
Rspo1	-0.683708	2.59186e-06	0.000106182	0.147171	0.733631	NA	-0.618938	0.000168046	0.00520157	-0.989606	0.0264222	0.312165	-0.923014	0.0118648	0.0658055
Telo2	-0.544859	0.00139309	0.0189496	-0.706676	2.08323e-06	2.42496e-05	-0.4974	0.00873844	0.100262	0.088536	0.748198	0.960177	-0.638167	0.0119309	0.0661148
Itsn2	0.435357	0.00200577	0.0249449	0.497276	1.84712e-05	0.000161694	0.375214	0.016222	0.150977	-0.215241	0.455145	0.871793	0.513342	0.0121696	0.0669144
Tpcn1	-0.608004	0.000141229	0.00299419	0.0332415	0.775621	0.85485	-0.658981	0.000594702	0.0145072	-0.848282	0.00297792	0.0934232	-0.575699	0.0125149	0.068022
Ushbp1	-0.580695	0.00117748	0.0166248	-1.45478	1.74472e-05	0.000154395	-0.367857	0.0648442	0.347792	0.971368	0.0468385	0.412097	-1.25695	0.0133836	0.0713842
Adssl1	-0.718989	3.23628e-05	0.000897972	-0.473855	0.000124408	0.000852998	-1.24865	3.57891e-10	5.36028e-08	-1.01496	0.00163128	0.065279	-0.716089	0.0135896	0.0721423
Serhl	-0.832577	1.25173e-07	7.38784e-06	-0.968401	0.112879	NA	-0.7443	5.05117e-05	0.00200131	0.269791	0.628952	0.93001	-0.627856	0.0136177	0.0722315
Cyfip2	0.423748	0.00148548	0.0198335	0.572298	1.16805e-07	1.8385e-06	0.428212	0.00468658	0.0655416	-0.180789	0.521206	0.895142	0.898622	0.0136363	0.0722703
1110007C09Rik	0.501564	0.00331785	0.0358807	0.918176	1.93743e-07	2.91302e-06	-0.074674	0.702193	0.916351	-1.12139	3.83333e-05	0.00504638	0.684862	0.0138066	0.0729302
St3gal1	-1.03994	1.24383e-10	1.45591e-08	-0.4671	0.339526	NA	-0.974674	1.88922e-08	1.9638e-06	-0.668712	0.216114	0.722484	-0.988533	0.0139075	0.0732271
C1galt1	0.604516	5.72149e-05	0.00145428	0.418471	7.67447e-05	0.000560513	0.68001	0.000121023	0.00399392	0.234524	0.325447	0.80601	0.983709	0.0140166	0.0736434
Ube2b	0.500215	0.00250189	0.0291135	0.611091	8.82263e-06	8.57873e-05	0.42662	0.0162414	0.151019	-0.221861	0.475819	0.880358	0.450719	0.0141272	0.074072
Gm11110	-0.660555	1.20158e-05	0.000388326	-0.550496	0.0301044	0.0782153	-0.629225	0.00020245	0.00601263	-0.216337	0.446976	0.867273	-1.35701	0.0143032	0.0747183
Tbc1d10c	-0.861597	2.51635e-08	1.74379e-06	-0.00821735	0.955051	0.974003	-1.03929	4.26184e-09	5.54796e-07	-1.20592	0.0120177	0.206518	-0.402102	0.0144806	0.0753996
Zfp54	-0.537654	0.000833232	0.0125471	-0.912925	6.45161e-07	8.63435e-06	0.0971999	0.709047	NA	1.00061	0.0995976	0.554957	-1.54524	0.01452	0.0755112
Dyrk2	-0.615579	4.93906e-06	0.000182	-0.175758	0.268002	0.412113	-0.666923	1.53035e-05	0.000758656	-0.631659	0.00241649	0.084432	-1.07677	0.0145739	0.0756422
A230050P20Rik	0.569954	0.000101401	0.00231923	0.683859	1.74092e-08	3.32583e-07	0.392915	0.0200489	0.170734	-0.348183	0.0787767	0.505075	0.58509	0.0148992	0.0768258
Tmem30a	0.536512	0.00219389	0.0265037	0.452442	0.000351483	0.00203308	0.641759	0.00202577	0.0366747	0.206653	0.479735	0.882012	0.444911	0.015026	0.0773206
Mrps18b	-0.433465	0.00440693	0.0439715	-0.52254	0.000706461	0.00367292	-0.480023	0.0126462	0.129721	-0.0627323	0.871868	0.982063	-0.516687	0.0151054	0.0776505
Eif2ak2	-0.81625	2.65914e-09	2.34425e-07	-1.38293	1.72705e-18	1.35698e-16	-0.653323	4.81511e-05	0.00193843	0.584106	0.178224	0.681007	-0.934561	0.0152274	0.077951
Clec2d	-1.06165	6.00439e-08	3.76735e-06	-1.09787	0.0140024	0.042593	-0.889619	6.74587e-05	0.00250342	0.289564	0.743997	0.959207	-1.8372	0.0152726	0.0780153
H2-Q7	0.590635	0.00120431	0.0169443	0.669518	0.00180527	0.00800215	0.509874	0.0110496	0.118774	-0.201627	0.464938	0.876163	0.511712	0.0159128	0.0802052
Sc4mol	0.976427	4.41531e-10	4.48911e-08	0.832481	2.8447e-11	9.30065e-10	1.04681	1.00437e-07	9.02573e-06	0.216734	0.514614	0.894108	0.574732	0.0161369	0.0811422
Wdr18	-0.52914	0.000774972	0.0118474	-0.501152	0.000339333	0.00197636	-0.611077	0.001437	0.0286761	-0.261638	0.313596	0.800673	-0.318138	0.0162108	0.0813146
Hus1	-0.511117	0.00176098	0.0225863	-0.713314	9.32903e-08	1.49741e-06	-0.477349	0.0068332	0.0849817	0.113256	0.715601	0.951444	-0.728279	0.0162443	0.0814256
B630005N14Rik	0.528786	0.00160837	0.0210925	0.493012	2.14087e-05	0.00018297	0.492439	0.0203027	0.172122	-0.0191241	0.953839	0.996251	0.675801	0.0163254	0.0816766
Nedd8	-0.798239	3.05057e-06	0.00011962	-1.42217	9.86641e-17	6.2829e-15	-0.178695	0.389537	0.764744	1.17102	0.000174395	0.0143943	-0.468563	0.0169768	0.084041
Ccdc38	0.434481	0.00202683	0.0251172	1.31954	1.29126e-05	0.000118575	0.434797	0.00465645	0.0652513	-0.961805	0.00352642	0.103919	2.1941	0.0170991	0.084548
Sema4d	-0.744283	1.25667e-08	9.46171e-07	-0.261598	0.0578052	0.130835	-0.740548	1.62179e-06	0.000106556	-0.638128	0.0246285	0.298518	-0.633304	0.0175313	0.086144
Ogfod1	-0.449954	0.00267035	0.030463	-1.01041	4.80404e-10	1.26161e-08	-0.195416	0.283166	0.687723	0.723896	0.0235589	0.292261	-0.556613	0.0181097	0.0881115
Nxph4	-0.649289	0.000101394	0.00231923	-0.314642	0.486924	NA	-0.579241	0.00255074	0.0428063	-0.434371	0.311887	0.800333	-0.775752	0.0183534	0.0887555
Gadd45a	0.77475	2.48341e-06	0.000102645	0.832456	4.7181e-16	2.73622e-14	0.775147	0.000110665	0.00371435	-0.111267	0.733639	0.955263	0.851906	0.0186129	0.0895296
Prpf31	-0.727844	3.42957e-06	0.000131963	-1.23414	7.62673e-07	9.98753e-06	-0.572247	0.000601271	0.0146162	0.603951	0.304522	0.796644	-0.44233	0.0186411	0.0896036
Tmod1	-0.568314	0.000126463	0.00276966	-0.954494	0.019965	NA	-0.498804	0.0015443	0.0302539	0.436875	0.210512	0.716421	-3.02609	0.0186777	0.089746
Cchcr1	-0.597832	5.85903e-05	0.00147578	-0.992513	5.73174e-10	1.46959e-08	-0.421067	0.025401	0.198122	0.446124	0.0861139	0.525172	-0.4829	0.0187655	0.0900661
Amd1	-0.417742	0.00291241	0.0326889	-0.493302	0.00299774	0.0121607	-0.358653	0.0254687	0.198297	0.0575098	0.886326	0.982982	-0.610522	0.0188788	0.0904059
Phax	-0.484541	0.000794723	0.0120848	0.319559	0.587047	NA	-0.40755	0.0183291	0.162305	-0.89733	0.0731833	0.490075	-0.88932	0.0189522	0.0906893
Cotl1	0.56824	7.01217e-05	0.00171355	0.755008	3.80289e-14	1.80739e-12	0.41361	0.0221653	0.182363	-0.455024	0.204414	0.712669	0.463961	0.0193771	0.092101
Rbms1	0.399583	0.00272987	0.0310149	0.284499	0.637219	NA	0.471999	0.00206491	0.0369693	0.0916103	0.864546	0.981654	0.313942	0.0194691	0.0924006
Socs3	0.721205	0.000107771	0.00242512	0.26356	0.541674	NA	0.819002	9.67828e-05	0.00335484	0.527585	0.295032	0.791046	1.41386	0.0197697	0.0935835
Gm16039	0.464845	0.00200912	0.0249643	0.0722363	0.596181	0.720222	0.616496	0.000631016	0.0152131	0.516214	0.0624519	0.462513	0.571348	0.0199331	0.0942173
Adnp2	0.535263	0.000464066	0.00795076	0.633493	3.20969e-08	5.72748e-07	0.346688	0.0322215	0.229807	-0.355094	0.0640282	0.466103	0.722721	0.0200402	0.0945169
Sys1	0.525616	0.000217689	0.0042587	-0.505885	0.259501	NA	0.60445	0.000319019	0.00851269	1.10672	0.00235674	0.0834095	0.710072	0.0200997	0.0946432
Pomc	0.490073	0.00390365	0.0400692	-0.382163	0.579727	NA	0.565167	0.00357564	0.054136	1.26956	0.105123	0.564466	1.42268	0.0201914	0.0949109
Nqo2	-0.846608	1.80912e-08	1.29324e-06	-1.71345	2.67327e-28	5.78793e-26	-0.363442	0.0419687	0.271646	1.25415	0.000352551	0.0245879	-0.500456	0.0203252	0.0953643
Arhgef11	0.588999	2.11803e-05	0.000622405	1.26939	4.75408e-18	3.5358e-16	0.281165	0.0705038	0.363452	-1.11795	0.00078501	0.0399193	1.00989	0.020465	0.0958354
Skil	0.484659	0.00211119	0.0257728	0.801158	9.73577e-07	1.23994e-05	0.283061	0.0962831	0.426432	-0.613023	0.0134287	0.217682	1.01358	0.0209203	0.0970853
Tpm3-rs7	-0.533433	0.00365567	0.0383721	-0.665348	0.000620938	0.00328853	-0.487274	0.0461423	NA	0.00373011	0.992002	1	-0.628778	0.0209547	0.0971037
Myo1e	-0.443535	0.00426308	0.042905	-0.669117	0.230731	NA	-0.374924	0.0175736	0.157822	0.375179	0.447739	0.867398	-1.34253	0.0210206	0.0972679
Zfp759	-0.438595	0.00352925	0.0374117	-0.947923	5.06746e-09	1.078e-07	0.108903	0.628855	0.887958	0.936172	0.109628	0.573611	-0.627321	0.0211279	0.097662
Gsto1	-0.709116	1.40055e-05	0.000440368	-1.32052	2.01611e-19	1.73832e-17	-0.0903518	0.639019	0.892344	1.13356	0.000126554	0.0112826	-0.511194	0.0212272	0.0979339
Zfp35	-0.660565	5.23727e-06	0.000189825	-0.995923	1.05182e-07	1.66904e-06	-0.512674	0.00615942	0.0792193	0.298311	0.617445	0.926962	-0.579087	0.0212929	0.0980658
Prpsap2	0.474924	0.00125376	0.0174811	0.405603	0.000123046	0.000844845	0.314885	0.0997369	0.434966	-0.173615	0.603423	0.922055	0.511668	0.0213108	0.0981125
Pcyt2	0.519698	0.00105576	0.0152412	0.60698	1.70825e-06	2.04465e-05	0.374167	0.0567028	0.323255	-0.3465	0.348927	0.820737	0.759511	0.0220195	0.10063
Bcl2l11	0.499668	0.000425247	0.00740408	0.585604	7.02587e-08	1.15241e-06	0.536481	0.00125254	0.0260398	-0.119763	0.724739	0.95348	0.664143	0.0220862	0.100774
Lysmd3	0.547166	0.000990626	0.0144638	0.54679	3.63997e-06	3.95365e-05	0.294876	0.176222	0.577417	-0.344285	0.359246	0.82589	0.923404	0.0222611	0.101318
Alox5ap	-0.684104	5.71336e-05	0.00145428	-1.51068	1.60421e-08	3.10116e-07	-0.500073	0.00677106	0.0845144	0.859089	0.0597681	0.453851	-1.09886	0.0223561	0.101504
Srebf2	0.421006	0.00134721	0.0184879	0.502699	8.66518e-06	8.47639e-05	0.374871	0.014163	0.138436	-0.211921	0.371432	0.830738	0.607001	0.0224817	0.101886
Nub1	0.502245	0.000594959	0.00966127	0.587402	1.87423e-05	0.000163187	0.279872	0.0717205	0.367143	-0.380833	0.191855	0.698492	0.339254	0.0227493	0.102771
Abcb4	0.486132	0.00210505	0.0257204	0.791416	8.08665e-05	0.000585786	0.332625	0.0598347	0.33271	-0.483723	0.2068	0.714141	0.823882	0.0231079	0.103986
Gtpbp3	-0.540711	0.000344562	0.00622491	-1.35711	0.000700212	0.00365017	-0.44828	0.0107864	0.11674	0.909534	0.110788	0.575685	-0.426268	0.0233039	0.104596
Tmem205	-0.833714	5.9471e-06	0.000212763	-1.88373	2.47123e-13	1.0797e-11	-0.337087	0.100582	0.436044	1.49571	7.46577e-06	0.0015241	-1.19146	0.0234055	0.104844
Car3	-0.718678	1.09569e-05	0.000358261	-0.265696	0.684132	NA	-0.639611	0.000715574	0.0167798	-0.423351	0.567521	0.907833	-0.838872	0.0236191	0.105615
Pecam1	-0.740558	3.48966e-07	1.8015e-05	-0.802543	0.000415535	0.00234021	-0.668287	2.72164e-05	0.00119056	-0.0132704	0.977701	1	-0.720463	0.0237513	0.106095
Ncf4	-0.844048	1.13169e-06	5.00425e-05	-1.08238	6.18057e-11	1.89363e-09	-0.772253	2.90576e-05	0.00124536	0.134725	0.748699	0.960258	-0.379729	0.0239173	0.10665
Gas6	-1.00823	5.38129e-10	5.27859e-08	0.380568	0.441827	NA	-0.96981	6.37443e-08	5.95902e-06	-1.6962	0.000433298	0.0278696	-1.70066	0.0240545	0.107143
Tomm5	-0.556017	0.000490931	0.00827866	-0.702144	3.2551e-10	8.85879e-09	-0.373658	0.0911977	NA	0.210754	0.454863	0.87149	-0.581993	0.0242356	0.107806
Mrpl52	-0.595731	0.000513945	0.00856309	-0.856914	5.2026e-12	1.92004e-10	-0.114306	0.589088	NA	0.65522	0.00820451	0.170336	-0.877007	0.0242889	0.107957
Ybx2	1.01036	5.10126e-09	4.17973e-07	1.85644	7.1474e-15	3.78463e-13	0.501455	0.0210523	0.17633	-1.50523	0.000908127	0.0436583	1.14405	0.0247501	0.109523
Tspan13	0.582051	0.000142682	0.00301581	0.908277	3.60992e-14	1.72409e-12	0.0529694	0.739214	0.92954	-0.985043	0.00495286	0.127142	0.51535	0.0248095	0.109633
Rrp7a	-0.621064	0.000104094	0.0023576	-0.779485	2.21868e-11	7.30512e-10	-0.556841	0.00604037	0.077904	0.0597515	0.835133	0.977616	-0.430567	0.0248844	0.109907
Serinc5	0.479122	0.000492269	0.00829118	0.785606	1.1537e-09	2.78921e-08	0.249554	0.0966396	0.427196	-0.650099	0.014491	0.224094	0.940258	0.025474	0.111564
Fkbp11	-1.07319	4.19751e-10	4.29905e-08	-1.37758	2.40548e-08	4.44718e-07	-0.955394	2.15506e-06	0.000135827	0.270563	0.365925	0.828852	-1.47853	0.0255237	0.111629
Sc5d	0.704985	1.14316e-05	0.000372033	0.636058	7.07664e-07	9.32987e-06	0.420748	0.0362601	0.246856	-0.304728	0.354914	0.824698	0.580058	0.0256468	0.111976
Galnt11	0.527292	0.000495564	0.00832654	0.807864	6.06748e-12	2.17336e-10	0.211038	0.197007	0.603284	-0.663567	0.00496437	0.127142	0.68081	0.025941	0.112874
Athl1	-1.13975	5.98753e-12	8.01927e-10	-0.922007	4.69702e-13	1.9897e-11	-1.2869	1.13892e-11	2.36776e-09	-0.574405	0.0852076	0.522678	0.379822	0.0261531	0.113333
Lsp1	-0.55058	0.000117922	0.00260719	-0.556973	0.00451247	0.0169814	-0.485416	0.00211929	0.0375959	-0.0732135	0.878618	0.982682	-0.478604	0.0264494	0.114152
Fzd5	0.525158	0.00247553	0.0289761	0.877581	1.89116e-08	3.59874e-07	0.0465145	0.81216	0.952416	-0.99529	0.0684101	0.475784	0.916166	0.0269966	0.115653
Hsdl2	0.471752	0.00262977	0.0302228	0.55894	0.000186339	0.00119284	0.283315	0.0977194	0.430194	-0.345479	0.125077	0.606481	1.00686	0.0272812	0.116563
Patz1	-0.489305	0.00135955	0.0186207	-1.83145	1.0092e-22	1.15678e-20	-0.36719	0.0435733	0.277012	1.36412	0.000107152	0.00992992	-0.445405	0.0274286	0.116897
Nudt8	-0.629418	0.000203316	0.00403656	-0.824824	6.40132e-12	2.28454e-10	-0.214963	0.337768	0.73002	0.454419	0.195717	0.706068	-0.452235	0.0278937	0.118306
Klhl24	0.453512	0.00237663	0.0280306	0.342197	0.00154101	0.00704557	0.534474	0.00108684	0.0232188	0.157146	0.435668	0.862052	0.673971	0.0279161	0.118321
Spns2	-0.607564	0.000150753	0.00316241	0.674426	0.207425	NA	-0.552967	0.0018236	0.0340039	-1.52111	0.0029756	0.0934232	1.21668	0.0279785	0.118507
Avl9	0.722637	1.3273e-05	0.000421139	0.679638	5.94228e-10	1.51602e-08	0.614484	0.00336181	0.0516794	-0.0712871	0.828548	0.976197	0.635725	0.0281579	0.118788
Lsm4	-0.449433	0.00333548	0.0360155	-0.0732652	0.49595	0.633545	-0.755872	3.2096e-05	0.00136717	-0.826831	0.0243808	0.296676	-0.254133	0.0281563	0.118788
Rpn2	-0.410775	0.00393188	0.0402996	-0.420514	0.000716977	0.00371569	-0.537367	0.000657711	0.0157681	-0.262132	0.254979	0.763384	-0.335803	0.028171	0.118788
Rhebl1	-0.453502	0.00408414	0.0414636	-0.445454	0.00184581	0.00815221	-0.4623	0.0180777	0.160385	-0.155172	0.516028	0.894108	-0.80777	0.0282413	0.118949
Zfp36	0.579433	0.000372673	0.00665507	0.463311	1.11322e-05	0.000105098	1.10831	2.7862e-10	4.31211e-08	0.687059	0.0587449	0.449718	1.44115	0.0285992	0.120139
Mxd4	0.804684	9.39839e-07	4.32047e-05	1.02097	1.7187e-16	1.06749e-14	0.641371	0.00137632	0.0277435	-0.357039	0.230977	0.737673	0.756726	0.0288987	0.121158
Spin1	0.549463	0.000228815	0.00442106	0.508367	9.73629e-06	9.3275e-05	0.499324	0.00200907	0.0365808	-0.0868201	0.715272	0.951444	0.724131	0.029217	0.122132
9030617O03Rik	-0.531307	0.000103385	0.00234642	-1.07611	1.90994e-16	1.17776e-14	-0.351618	0.019086	0.166045	0.591348	0.0931934	0.539783	-0.49664	0.0296981	0.123432
Psat1	-0.494345	0.000143306	0.00302442	0.127926	0.832324	NA	-0.419677	0.00581365	0.0758224	-0.621826	0.210152	0.715888	-0.241491	0.0298695	0.123814
Fbf1	-0.417238	0.00376934	0.0390068	-0.593393	3.18194e-06	3.52027e-05	-0.338796	0.0543727	0.31491	0.132596	0.540573	0.901546	-0.438622	0.0301569	0.124753
Wdfy4	-0.814625	4.9678e-09	4.11884e-07	-1.14529	2.31216e-12	8.93944e-11	-0.744975	2.86557e-07	2.29394e-05	0.279748	0.542408	0.901684	-0.475432	0.0303843	0.12545
Hk2	-0.716248	9.59587e-08	5.76125e-06	-1.20401	4.67588e-13	1.98939e-11	-0.567395	0.000116958	0.00389737	0.525181	0.0523791	0.431469	-0.471941	0.0305187	0.125801
Rasal1	-0.549338	0.000215144	0.00421483	-0.63943	0.00434643	0.0164583	-0.482387	0.00365629	0.054939	0.0618762	0.826573	0.97614	-0.709385	0.0311738	0.127811
Nip7	-0.626486	8.24442e-05	0.00195633	-0.918749	3.21268e-10	8.76783e-09	-0.256981	0.202797	0.61012	0.561604	0.0193965	0.265336	-0.391361	0.0312474	0.127978
Vps54	0.460799	0.0037043	0.0386926	0.168202	0.171448	0.297216	0.540076	0.00330903	0.0510427	0.332295	0.253706	0.761334	0.286489	0.031438	0.128379
Acot7	-0.438634	0.0017491	0.022496	-0.172922	0.208847	0.345465	-0.531805	0.00216314	0.0379955	-0.516554	0.10539	0.564673	-0.350224	0.0319075	0.129566
Fam96a	-0.584276	8.14804e-05	0.00194339	-0.878563	2.78727e-09	6.27168e-08	-0.434608	0.0172562	0.156383	0.300883	0.54163	0.901684	-0.264395	0.0322349	0.130349
Tspan14	-0.659947	2.83188e-07	1.51131e-05	0.160813	0.130694	0.243937	-0.913112	1.43416e-09	1.98824e-07	-1.24982	0.000449706	0.0281401	-0.706785	0.0329211	0.132369
Dnase2a	-0.516976	0.000576424	0.0094348	-0.807648	1.69514e-10	4.90081e-09	-0.325003	0.0602735	0.333419	0.37935	0.196268	0.706068	-0.532857	0.0331078	0.13291
Nfkbid	-0.53994	0.000228219	0.00442106	-0.257273	0.0131036	0.0402739	-0.822291	2.58966e-06	0.000156832	-0.755006	0.03045	0.333011	-0.528257	0.0342642	0.13597
Lss	0.738383	3.74103e-06	0.000143156	0.813402	5.67819e-07	7.66242e-06	0.630915	0.000267547	0.00742363	-0.361551	0.404941	0.847365	0.50025	0.0344682	0.136362
N4bp2	0.432306	0.00144409	0.0194158	0.28148	0.0337801	0.0855968	0.506818	0.00135872	0.0274681	0.164156	0.476515	0.88098	0.826728	0.034819	0.137037
Smarcd1	0.474557	0.00396367	0.0405657	0.497853	8.73248e-05	0.000625133	0.270028	0.138716	0.513194	-0.298763	0.270898	0.773452	0.52468	0.0349155	0.137316
Limk1	-0.625181	3.85991e-05	0.00105009	-0.233518	0.208509	0.345209	-0.625437	0.000814764	0.0186352	-0.596368	0.121212	0.598663	-0.490425	0.035854	0.139929
Tbc1d2	-0.428036	0.00504434	0.0484904	0.34822	0.15997	0.28338	-0.467318	0.00645221	0.0818514	-0.993811	0.00156525	0.0637228	1.65994	0.0358917	0.139991
Pan2	-0.791462	1.81845e-07	1.02964e-05	-0.937287	4.57647e-07	6.29782e-06	-0.720063	7.83427e-06	0.000419706	0.112253	0.845648	0.978554	-0.292645	0.0359379	0.140086
Arhgef2	-0.504556	0.000135014	0.00288438	-0.3278	0.439524	NA	-0.421115	0.00852292	0.0985193	-0.156339	0.662258	0.938015	-0.305456	0.0362494	0.141127
Arnt	0.475917	0.00111683	0.0159388	0.327769	0.00660113	0.0232351	0.386501	0.028081	0.211368	0.012856	0.962254	0.99837	0.308744	0.0364517	0.141483
Clint1	0.487019	0.000470519	0.00801205	0.151711	0.265939	0.410235	0.509259	0.00181051	0.033832	0.256917	0.404529	0.847365	0.44724	0.0367217	0.142068
Osbp	0.439441	0.00331481	0.0358756	0.469233	0.000156979	0.00103433	0.305638	0.0549393	0.316874	-0.247764	0.293577	0.791037	0.585847	0.0371616	0.142977
Cdkn3	0.678931	1.49311e-05	0.000465643	0.825402	3.29211e-12	1.2628e-10	0.285636	0.10606	0.447397	-0.621081	0.0609596	0.456986	0.419805	0.0373754	0.143584
Lactb	1.14448	6.78892e-11	8.50562e-09	1.32298	4.52315e-23	5.50863e-21	1.20453	1.80203e-09	2.43694e-07	-0.0237906	0.945914	0.995278	0.756027	0.0379129	0.145255
Rwdd4a	-0.446876	0.00425487	0.0428532	-0.689182	1.55113e-05	0.000139158	-0.317506	0.0696416	0.360475	0.267845	0.331675	0.809629	-0.602563	0.0379554	0.145374
Crat	0.447258	0.00365007	0.0383423	0.580431	3.91202e-06	4.21624e-05	0.434906	0.0143391	0.139664	-0.206705	0.437662	0.863068	0.368384	0.0386976	0.147151
Haghl	-0.525448	0.0013262	0.0182943	-0.77623	2.00774e-09	4.67977e-08	-0.404663	0.0259738	0.201105	0.226279	0.489399	0.885137	-0.494718	0.0388148	0.147471
Heca	0.578927	5.35097e-05	0.00138281	0.561049	6.86564e-06	6.9318e-05	0.573173	0.000555983	0.0137554	-0.0380213	0.857205	0.980885	0.873174	0.0391022	0.148519
Tns3	-0.866958	2.32643e-09	2.07724e-07	-0.712952	7.9354e-05	0.000576544	-0.832219	1.64529e-07	1.42343e-05	-0.255295	0.433494	0.861913	-1.00501	0.0401053	0.151338
Sdf2l1	-0.581771	0.000231011	0.00445672	-0.567749	6.91073e-06	6.9629e-05	-0.909954	4.17626e-05	0.00171092	-0.629252	0.0697315	0.478714	-0.524325	0.0403534	0.15187
Epb4.1	0.539259	9.84737e-05	0.00227093	0.435064	0.00201576	0.00877547	0.589495	0.000263927	0.00735698	0.0885391	0.713741	0.951341	0.430542	0.0409636	0.153487
Ccnb2	0.49094	0.000710194	0.01113	0.512301	4.10789e-06	4.39333e-05	0.151893	0.349311	0.7381	-0.465627	0.170148	0.673129	0.58972	0.0409435	0.153487
Wdr85	-0.645279	8.96856e-05	0.00208798	-0.931693	2.29837e-10	6.43476e-09	-0.501444	0.00742972	0.0898456	0.278387	0.420922	0.855631	-0.397805	0.0411189	0.153782
Stk10	-0.483452	0.000257123	0.0048994	0.283236	0.00491066	0.0182265	-0.592741	0.000246729	0.00698513	-1.00616	0.000296362	0.0217425	-0.593595	0.0412751	0.154202
Mlxip	0.387938	0.00259443	0.0299651	0.399229	0.000228892	0.0014198	0.206535	0.158858	0.549203	-0.306188	0.32135	0.805412	0.406824	0.0420948	0.156076
Cdc25a	-0.618087	1.04774e-05	0.000345012	-0.75282	2.66368e-09	6.0214e-08	-0.538832	0.000367148	0.00963089	0.105354	0.671328	0.941005	-0.665094	0.0423286	0.156715
Lrrfip2	0.422969	0.00304465	0.033792	0.547132	3.86204e-05	0.000308678	0.213825	0.197269	0.603638	-0.424919	0.12676	0.610062	0.660527	0.042417	0.156861
Gm4907	0.788541	0.000505994	0.00847114	1.15654	0.0950238	NA	0.857235	0.000203919	0.00604339	-1.1473	0.196497	0.706068	1.15473	0.0427755	0.157766
Cyb5r1	-0.674997	1.83944e-05	0.000554579	-0.817347	1.34717e-09	3.22493e-08	-0.707836	0.000146728	0.00463442	-0.0354198	0.870081	0.98185	-0.422208	0.0428719	0.158039
Trub2	-0.420032	0.00321196	0.03498	-0.158958	0.321957	0.470712	-0.414928	0.0136841	0.136213	-0.367108	0.131429	0.620403	-0.38664	0.0429566	0.158214
Lrrc8c	-0.609614	2.03109e-06	8.59911e-05	-0.0586053	0.669839	0.776216	-0.775701	2.50192e-08	2.54374e-06	-0.849775	0.00565854	0.138139	-0.518066	0.0432332	0.15858
Gys1	-0.476591	0.000762648	0.011764	-0.545339	0.000111614	0.000775096	-0.427657	0.00926581	0.105101	0.00932207	0.967793	1	-0.37029	0.0445428	0.161515
Tti2	-0.501864	0.00125092	0.017459	-1.11831	4.90926e-08	8.36137e-07	-0.350831	0.0367205	0.248654	0.676643	0.224747	0.731241	-0.437008	0.0446721	0.161732
Gpt2	-0.514229	0.000528026	0.0087767	-1.20084	5.51478e-12	2.01994e-10	-0.337077	0.0523721	0.307543	0.772238	0.00812406	0.169997	-0.361684	0.0448454	0.161946
Rhob	0.724256	3.18801e-06	0.000123693	0.776199	1.63157e-06	1.96252e-05	0.56157	0.00973206	NA	-0.237976	0.446968	0.867273	1.02444	0.0461652	0.165541
Fam105b	0.526808	0.000730157	0.0114018	0.531742	1.07304e-05	0.000101958	0.298492	0.0756702	0.377106	-0.318087	0.176055	0.678883	0.393524	0.0466607	0.166795
Impa2	-0.643253	8.83686e-07	4.08932e-05	-0.567745	5.89567e-06	6.05923e-05	-0.800157	5.07956e-07	3.69752e-05	-0.383642	0.205871	0.71303	-0.306267	0.0468575	0.167115
Ggct	0.768049	9.5986e-06	0.000321391	0.887506	2.11633e-08	3.97291e-07	0.362072	0.105504	NA	-0.565471	0.0460635	0.40998	1.07537	0.0470073	0.167358
Pik3cd	-0.418685	0.00311546	0.0344401	-0.929214	0.000206634	0.00129802	-0.331457	0.0506872	0.301333	0.512948	0.326519	0.806674	-0.200563	0.0474991	0.168338
Dpp4	-0.496981	0.000273641	0.0051717	-0.410143	0.000532751	0.00288046	-0.454716	0.00350958	0.0533679	-0.147312	0.660088	0.93746	-0.406591	0.0475877	0.168511
Cldn15	-0.564521	0.00199408	0.0248439	-0.376199	0.167104	0.292559	-0.563629	0.00450361	0.0635577	-0.37985	0.40486	0.847365	-1.07094	0.0476898	0.168639
Hps1	0.435682	0.00342645	0.0367478	0.493176	7.39392e-05	0.000544924	0.374353	0.0347689	0.239988	-0.184008	0.426577	0.858909	0.386991	0.0477891	0.168849
Lonp1	-0.495546	0.000645843	0.0103046	-0.080792	0.491838	0.629943	-0.676655	0.000169331	0.00522921	-0.769519	0.0116632	0.203326	0.279424	0.0482632	0.170242
Tmem186	-0.513108	0.000571251	0.00936112	-0.79947	3.00709e-09	6.73518e-08	-0.183778	0.296926	0.697922	0.529191	0.0193807	0.265336	-0.321954	0.0484071	0.170608
Bace1	-0.574108	7.0805e-05	0.0017242	0.244235	0.677846	NA	-0.51664	0.000693462	0.0163999	-0.999074	0.131248	0.620008	-1.46198	0.0493392	0.172701
Ecm1	-0.808772	7.99524e-06	0.000274599	-1.27383	0.000234561	0.00144825	-0.664962	0.00120768	0.0253339	0.45096	0.328877	0.809225	-0.511573	0.0500278	0.174346
Gla	-0.497546	0.00136637	0.018686	-0.902693	0.00143703	0.00664184	-0.372672	0.0317408	0.227427	0.461504	0.451056	0.86944	-0.588266	0.0503759	0.175081
Cenpj	0.477594	0.00160968	0.0210925	0.473369	0.000135363	0.000915865	0.382357	0.0248258	0.195297	-0.154782	0.521053	0.895142	0.688703	0.0504763	0.175334
Atp1b2	0.550335	0.00282943	0.0319636	0.757098	3.92519e-06	4.22576e-05	-0.0336695	0.888599	NA	-0.872139	0.0142573	0.224077	-1.52109	0.0505144	0.175336
Cyb5rl	-0.456149	0.00252505	0.0293585	-0.514039	0.000178863	0.00115534	-0.432323	0.0141048	0.138072	-0.0381247	0.866037	0.981654	-0.622854	0.0505963	0.17556
Armcx4	0.991552	1.81049e-08	1.29324e-06	1.50575	9.81115e-17	6.2829e-15	0.424628	0.0407632	0.266945	-1.17153	0.000217895	0.0172431	1.21902	0.0511656	0.176767
Cyfip1	-0.38124	0.003599	0.0380065	-1.44364	2.92137e-17	1.99041e-15	-0.246896	0.0922227	0.418246	1.10497	1.96474e-05	0.00300819	-0.395224	0.0512365	0.176963
Eef1g	-0.434487	0.00123322	0.0172639	-0.429921	5.37716e-05	0.000412517	-0.597496	0.000123453	0.0040271	-0.330075	0.272322	0.774104	-0.25063	0.0515044	0.177432
Pdcd11	-0.410806	0.00347908	0.037049	-0.52715	8.8143e-06	8.57873e-05	-0.379909	0.0241153	0.192604	0.0211566	0.941402	0.994509	-0.283467	0.0515056	0.177432
Rasgrp4	-0.608414	0.000395859	0.00697081	-1.1628	0.00355106	0.013962	-0.511379	0.00550159	0.0731218	0.569289	0.145626	0.644539	-1.36308	0.0525669	0.17957
Rad52	-0.437978	0.00114212	0.0162332	-0.742551	5.96448e-09	1.24972e-07	-0.36082	0.0222686	0.182997	0.257058	0.378482	0.834694	-0.56485	0.0526106	0.179619
Fyn	-0.476487	0.000164768	0.00339004	-0.430119	0.341322	NA	-0.401811	0.0049072	0.0678099	-0.00962628	0.982045	1	-0.266143	0.0527986	0.180017
Lrrn4	-0.6927	1.99963e-05	0.000595147	-0.434558	0.427264	NA	-0.615939	0.000869994	0.0196339	-0.299754	0.545267	0.902137	-0.842056	0.0528813	0.180206
Tnni2	-1.42999	5.57597e-18	1.43829e-15	-1.65003	1.48695e-15	8.32609e-14	-1.34439	2.36771e-12	5.78593e-10	0.0867792	0.839727	0.978221	-0.76839	0.0529128	0.180217
Atf3	-1.06608	1.01228e-08	7.79006e-07	-2.31916	2.30585e-28	5.10588e-26	-0.382312	0.0578052	0.326508	1.84617	2.89442e-08	1.69878e-05	-1.67444	0.0531866	0.180908
Nr4a2	-0.466487	0.000767168	0.0117816	-0.18475	0.332988	0.481564	-0.489584	0.00186521	0.0346099	-0.434175	0.0453043	0.407247	-0.861402	0.0532327	0.180969
Vim	-0.819545	2.26449e-07	1.24181e-05	-1.3003	1.3422e-12	5.40375e-11	-0.711453	0.000133914	0.00430782	0.415988	0.29088	0.789618	-0.497239	0.0542757	0.183439
Trp53inp1	0.62793	0.00018431	0.0037369	0.718115	2.99955e-08	5.39199e-07	0.27149	0.241243	0.649999	-0.511947	0.210966	0.716582	0.83461	0.0545268	0.183856
Ypel5	0.618883	0.000343456	0.00621298	0.807659	2.30747e-09	5.2898e-08	0.642739	0.00129595	0.0266637	-0.159609	0.599175	0.920268	0.434763	0.0546116	0.184087
Ctso	0.734181	3.22407e-05	0.000896369	0.756131	5.1489e-07	6.98687e-06	0.532697	0.0206209	0.174077	-0.214008	0.579212	0.913433	0.581098	0.0549261	0.184889
Ap1s3	0.815126	3.96232e-08	2.55514e-06	1.00343	6.78532e-14	3.13315e-12	0.644908	0.000175917	0.00537246	-0.396469	0.198913	0.707808	0.705293	0.0550831	0.185187
Crygn	-0.844729	8.73796e-08	5.29179e-06	-0.228827	0.659173	NA	-0.774403	1.58069e-05	0.00077254	-0.768257	0.0917375	0.535744	-2.25082	0.0560307	0.187456
Trim68	0.520867	0.00209402	0.0256213	0.462351	0.00175834	0.00784408	0.44444	0.0506525	NA	-0.0255619	0.923226	0.991685	0.663762	0.0564392	0.188214
Sparc	-0.686163	0.000430955	0.00747543	-1.86392	0.000515863	NA	-0.598004	0.00313778	0.0492186	1.47868	0.00698923	0.155409	-1.02726	0.0569317	0.189456
Polr3k	-0.583455	0.00132653	0.0182943	-0.827107	1.00694e-08	2.01037e-07	-0.102722	0.636667	NA	0.666147	0.0300732	0.330946	-0.337117	0.0574194	0.190744
Gm10369	-1.00921	3.60665e-09	3.08203e-07	-0.0744239	0.81653	0.883742	-0.974044	3.87861e-07	3.00139e-05	-1.09057	0.00719543	0.157939	-1.14636	0.057445	0.190766
Vps37b	0.557397	0.000191693	0.00385296	0.641261	5.29824e-06	5.51504e-05	0.537186	0.0018772	0.0347245	-0.197109	0.584853	0.915346	0.362704	0.0574904	0.1908
Wdr78	0.460897	0.00229663	0.0272951	0.335844	0.0022501	0.00961947	0.462589	0.00762814	0.0914918	0.0789034	0.710231	0.950961	0.838795	0.0586318	0.193348
Klhdc2	0.769173	2.07737e-06	8.76839e-05	0.991926	2.48541e-16	1.48561e-14	0.286435	0.0767899	0.380102	-0.778475	7.03892e-05	0.00768606	0.426647	0.0589551	0.194064
Trim36	0.516305	0.000924071	0.0136349	0.14522	0.80711	NA	0.585018	0.00122815	0.0256092	0.313195	0.556605	0.906083	0.657572	0.0593695	0.194975
Gart	-0.420266	0.00188629	0.0238206	-0.349489	0.0113451	0.0359698	-0.493454	0.000863177	0.0195182	-0.272295	0.299603	0.794459	-0.326595	0.0598002	0.195885
Fbp1	-0.498119	0.000780777	0.0119118	-1.6199	6.34772e-15	3.38944e-13	-0.248667	0.119204	0.475761	1.29816	1.87661e-05	0.00290518	-0.621251	0.0602926	0.196993
Mmachc	-0.577571	0.000509118	0.00850186	-0.718959	0.0243155	0.066064	-0.43869	0.0169095	0.154442	0.253586	0.79249	0.968255	-0.396161	0.0607338	0.197848
Acot2	0.777676	1.09868e-06	4.87375e-05	0.788194	6.43761e-11	1.96005e-09	0.80786	8.54781e-05	0.00304508	0.0602068	0.845623	0.978554	0.491809	0.0609541	0.19814
9330160F10Rik	0.505969	0.00133051	0.0183138	0.299663	0.210611	0.347038	0.586735	0.00136605	0.0275764	0.197996	0.610211	0.924836	0.995907	0.0615722	0.199387
Amdhd1	0.681396	5.38365e-05	0.00138868	0.603398	0.000900483	0.00451772	0.563096	0.00736274	NA	-0.0483369	0.857352	0.980885	1.14586	0.0618346	0.19966
H2-K1	0.52313	0.00176037	0.0225863	0.593821	3.74134e-09	8.15017e-08	0.340074	0.0872929	0.404761	-0.353019	0.360602	0.826475	0.345779	0.0619199	0.199704
Zfp408	-0.490401	0.00185618	0.0235089	-0.979958	1.54481e-05	0.00013872	-0.243899	0.176921	0.578773	0.632031	0.210822	0.716582	-0.284618	0.063154	0.202505
Msi2	-0.751699	1.04666e-08	8.01041e-07	0.165479	0.238984	0.380212	-0.766564	2.88647e-07	2.29747e-05	-1.08516	0.000525656	0.0304707	-0.525607	0.0632102	0.202615
Arl6ip5	-0.493908	0.000332582	0.00607148	-0.523167	0.000360417	0.00207783	-0.535262	0.000849624	0.0192743	-0.121863	0.764807	0.963947	-0.303476	0.0632359	0.202615
Nup188	-0.452299	0.000976362	0.0142854	-0.057118	0.630014	0.746886	-0.377798	0.0132879	0.133968	-0.486348	0.150977	0.650951	-0.274567	0.0635406	0.203338
Tmsb10	0.702294	7.39821e-06	0.000256982	0.635068	1.97259e-07	2.96132e-06	0.812632	6.83314e-06	0.000370346	0.209159	0.664477	0.939176	1.22442	0.0636257	0.203455
Gpr152	-0.708618	2.45483e-05	0.00071236	-1.19446	0.00783786	NA	-0.621845	0.00135358	0.0274681	0.394531	0.653904	0.936029	0.475902	0.0636682	0.203541
Ascc2	-0.466545	0.000756022	0.0116748	-0.962799	3.41633e-09	7.49668e-08	-0.327576	0.0338093	0.236747	0.540446	0.049779	0.422442	-0.284418	0.0639182	0.20403
Csf2rb	-0.611101	0.000737242	0.011461	-1.83174	1.72855e-12	6.81834e-11	-0.35504	0.0682219	0.35617	1.38685	0.002887	0.0917975	-0.671878	0.0642869	0.204866
Atg9b	-0.559832	6.54402e-05	0.00161903	-0.611326	0.099924	0.199214	-0.477584	0.00438957	0.0625817	0.0324532	0.923923	0.991685	-0.405283	0.0659442	0.208725
Rnf220	-0.641997	5.05454e-06	0.000185368	0.392501	0.504516	NA	-0.553596	0.00105095	0.0226664	-1.24546	0.0130327	0.214285	-0.243735	0.066335	0.209754
Hif1a	0.577835	0.000561007	0.00923673	0.646571	0.356223	NA	0.642868	0.000752838	0.0174771	-0.554239	0.560768	0.907303	0.74644	0.0669947	0.211016
0610039K10Rik	0.492474	0.00233422	0.0276474	0.553969	4.24788e-08	7.38181e-07	0.206196	0.207255	0.614487	-0.462319	0.103795	0.562701	1.096	0.0674304	0.211592
Ccdc135	-0.762491	4.07566e-07	2.07948e-05	-0.517638	0.266352	NA	-0.692284	1.75742e-05	0.000838327	-0.169072	0.76806	0.964819	-0.422936	0.0679436	0.212821
Zfp628	0.456793	0.00260271	0.0300109	0.438976	0.000123158	0.000845019	0.469991	0.00541845	0.0725116	0.0109915	0.966794	1	0.479882	0.0681877	0.213287
Chac1	-0.770466	6.36927e-06	0.000224602	-0.934686	0.00110748	0.00535844	-0.670696	0.000405975	0.0105108	0.165418	0.627478	0.929896	-1.07572	0.0686228	0.214175
Uqcc	-0.397352	0.00289265	0.0325458	-0.460158	5.13182e-05	0.000397451	-0.455035	0.00251747	0.0423501	-0.109468	0.651698	0.935182	-0.278231	0.0687363	0.214425
Megf9	0.519593	0.00345272	0.0368811	0.484868	0.00029564	0.00175957	0.450356	0.0372309	0.251254	-0.000810422	0.998131	1	1.10498	0.0694099	0.21563
Rb1cc1	0.458217	0.00503347	0.0484194	-0.461934	0.44395	NA	0.527177	0.00508855	0.0696936	1.12554	0.0545967	0.438956	0.437482	0.0702723	0.217568
Fam134a	0.529431	0.00318429	0.034733	0.566515	4.2138e-06	4.50165e-05	0.517653	0.0183605	0.16248	-0.0819582	0.830283	0.97673	0.432452	0.0703601	0.217731
F9	0.702443	0.00141398	0.0191403	0.865867	0.0833784	NA	0.753605	0.00068164	0.01623	-0.180264	0.776804	0.965433	-1.06701	0.0719087	0.221325
Dqx1	-0.602882	0.000173916	0.00355724	-0.606435	0.00669258	0.0234891	-0.541597	0.00322256	0.0502654	-0.0748207	0.843688	0.978554	-0.752526	0.0728222	0.223242
Fance	-0.652158	1.25882e-05	0.000404945	-0.801056	6.65255e-11	2.01291e-09	-0.64474	0.000215523	0.00627214	-0.0126124	0.9668	1	-0.564225	0.0742309	0.226013
Pik3c2a	0.499545	0.000324275	0.00594785	0.670615	1.29241e-09	3.10146e-08	0.411147	0.00919629	0.104397	-0.355133	0.107961	0.56972	0.306	0.0743472	0.226172
Ap1s2	0.589453	0.00297705	0.0332004	0.56886	0.000221344	0.00137887	0.6609	0.00558536	0.0738464	0.13114	0.732249	0.954947	0.598267	0.0744293	0.22632
Med30	0.508492	0.00203101	0.02512	0.296739	0.0387184	0.0954297	0.556355	0.00410146	0.0598885	0.222237	0.504681	0.889475	0.362536	0.0753129	0.228192
Sos1	0.451241	0.00138765	0.0188941	0.311205	0.00648801	0.0228783	0.436173	0.00579925	0.0757055	0.0343329	0.898462	0.98557	0.387234	0.0767408	0.231194
Hes5	-0.519325	0.00255474	0.0296048	-0.626293	0.000578522	0.00310211	-0.437364	0.028493	0.213262	0.0593657	0.839185	0.978221	-0.707608	0.0773693	0.232396
Cyp51	0.44723	0.00188422	0.0238161	0.284429	0.0069438	0.0241877	0.534741	0.00114651	0.0242333	0.214439	0.418055	0.854766	0.305119	0.0776057	0.232708
Prkd3	0.46458	0.003236	0.0352049	0.447263	0.000617945	0.00328024	0.394204	0.0186975	0.164328	-0.109088	0.641549	0.933753	0.303879	0.0778406	0.233112
Rpusd1	-0.912643	2.56242e-07	1.38583e-05	-1.44233	4.65983e-15	2.50833e-13	-0.188927	0.391926	0.766094	1.163	0.00103514	0.0480934	-0.367052	0.0783335	0.234284
Cyth3	0.435914	0.00168301	0.0218204	0.743637	2.62914e-09	5.95714e-08	0.193548	0.206236	0.613717	-0.642328	0.0029173	0.0923441	0.609463	0.0802055	0.237932
Traip	-0.578833	0.000277452	0.00522248	-0.538857	0.000656019	0.00345119	-0.639164	0.000298193	0.00807857	-0.229426	0.518305	0.894243	-0.423566	0.0803683	0.238103
Ndfip1	0.663423	2.10568e-05	0.000620086	0.636955	1.92073e-07	2.89238e-06	0.471916	0.0119297	0.125221	-0.244885	0.467375	0.877288	0.546011	0.0809328	0.2392
Adora2a	-0.533178	0.000910259	0.0135027	0.179394	0.64852	NA	-0.53223	0.00282862	0.0461356	-0.915248	0.0524515	0.431813	-1.25119	0.082648	0.242472
Sqle	0.438816	0.00215593	0.0261358	0.283756	0.0165509	0.0487203	0.416043	0.0110938	0.118774	0.0248325	0.930796	0.99265	0.452418	0.0827331	0.242616
Rreb1	-0.514023	4.03832e-05	0.00109011	0.214772	0.682553	NA	-0.43469	0.00432904	0.0617819	-0.922396	0.0464536	0.411397	-0.597103	0.083125	0.243312
Gm561	-0.731772	1.885e-05	0.000567089	-0.848277	6.51792e-07	8.69919e-06	-0.570477	0.0553917	NA	-0.0349032	0.939845	0.994509	0.388243	0.083337	0.243709
Ftsjd1	-0.495336	0.00204813	0.0252241	-0.813912	5.50807e-08	9.22243e-07	-0.0394586	0.862526	NA	0.666968	0.0152404	0.230092	-0.653818	0.0836116	0.244121
Nenf	0.54164	0.000869427	0.0129938	0.643711	1.16861e-08	2.30481e-07	0.502594	0.00861155	0.0991807	-0.19271	0.490254	0.885794	-0.510829	0.0836504	0.244178
1700001P01Rik	-0.641757	0.000123954	0.00272758	-0.749674	0.000419249	0.00235534	-0.540737	0.00423066	0.0608769	0.0830676	0.802092	0.970843	-1.61053	0.0851448	0.247352
Phgdh	-0.645523	2.22831e-06	9.29706e-05	-0.705624	1.25393e-05	0.000115692	-0.587737	0.000113548	0.00380195	-0.029611	0.945211	0.995278	-0.323493	0.0857757	0.248361
Grb10	-0.737591	2.66909e-06	0.000107802	-0.228977	0.741013	NA	-0.677724	2.00849e-05	0.000926365	-0.40951	0.706426	0.949914	-0.599608	0.0867006	0.250226
Trmt12	-0.628195	0.000346091	0.00624444	-0.871784	3.78073e-06	4.0883e-05	-0.401149	0.0647145	NA	0.305212	0.500446	0.887085	-0.551999	0.0869161	0.250615
Tlk2	0.46356	0.00342463	0.0367478	0.202644	0.683229	NA	0.533276	0.00336515	0.0516794	0.251496	0.586456	0.915346	0.219036	0.0886547	0.253517
Snx4	0.469048	0.00234012	0.0276938	0.504696	0.000144308	0.000963666	0.329652	0.0383266	0.255891	-0.240648	0.306334	0.798101	0.304115	0.0901329	0.256129
Zfp7	0.558459	0.000381951	0.00680331	0.710141	6.74518e-08	1.11011e-06	0.0568194	0.764151	0.93886	-0.731289	0.001189	0.0521755	0.870911	0.0918314	0.259454
Apoe	-0.627069	8.19348e-05	0.00195089	-0.882927	2.09257e-06	2.43293e-05	-0.492716	0.00815966	0.0955091	0.275493	0.318377	0.804817	-0.506666	0.0925721	0.260681
Extl2	-0.51579	0.00142048	0.0191874	-0.542584	0.00568545	0.0205267	-0.571403	0.00132786	0.0271161	-0.151644	0.693255	0.94644	-0.675674	0.095772	0.266982
Nedd9	-0.73996	2.87385e-08	1.9432e-06	-0.32751	0.0736243	0.157873	-0.704374	7.56197e-07	5.1887e-05	-0.484196	0.38416	0.836266	-0.746333	0.0960665	0.267569
Phb	-0.645004	3.47622e-05	0.000960721	-0.962696	1.07749e-08	2.13808e-07	-0.459332	0.00743069	0.0898456	0.380398	0.337421	0.814094	-0.313656	0.0961934	0.267572
Smpd3	-0.545214	0.00175486	0.0225494	0.110338	0.826956	NA	-0.51601	0.00584699	0.0761147	-0.845826	0.0823095	0.515982	1.1025	0.0966725	0.268461
Rbm34	-0.470895	0.00124263	0.0173781	-0.847543	5.4546e-12	2.00544e-10	-0.219753	0.186426	0.591241	0.527362	0.0486134	0.418846	-0.454739	0.0970856	0.269291
Lrrc45	-0.601859	0.00112123	0.0159853	-1.11995	1.90324e-10	5.4062e-09	-0.317677	0.129701	0.495777	0.67091	0.0638094	0.466103	-0.423059	0.0973052	0.269665
Ier2	-0.556336	0.000227446	0.00441239	-0.615408	3.8894e-07	5.47608e-06	-0.511538	0.00797459	0.0941346	-0.0437006	0.901604	0.986187	-0.476421	0.0994402	0.273268
8430410A17Rik	0.435932	0.00274758	0.0311654	0.470682	0.000118589	0.000815969	0.258162	0.11817	0.474213	-0.327856	0.190473	0.695258	0.499315	0.100046	0.273922
Plac8	-0.421498	0.00174085	0.0224314	-0.843646	1.52268e-05	0.000137111	-0.311937	0.0480577	0.29244	0.457359	0.336672	0.813793	-0.569188	0.100194	0.274078
Impa1	0.44309	0.00304972	0.0338056	0.397954	0.000285742	0.00171112	0.309208	0.0810937	0.38843	-0.179184	0.488366	0.885016	0.267223	0.101275	0.276235
Star	-0.824818	2.22932e-06	9.29706e-05	-0.927985	0.109971	NA	-0.76745	1.7682e-05	0.000838478	0.134599	0.804188	0.970843	1.31772	0.101308	0.27626
B930094E09Rik	0.579505	0.000600096	0.00970393	0.623173	8.73917e-08	1.41203e-06	0.585805	0.00323066	0.0503354	-0.0919461	0.787359	0.967853	1.06886	0.103873	0.280436
Svip	0.61372	0.00351149	0.0372801	1.07185	1.24583e-05	0.000115382	-0.0115024	0.960755	NA	-1.2	0.000332302	0.0238817	0.861746	0.104035	0.280742
Selplg	-0.461726	0.00515695	0.0492669	-0.543829	0.000125954	0.000860567	-0.458047	0.00771177	0.0921246	-0.0484523	0.889101	0.982982	0.32862	0.106478	0.285358
Rel	0.822576	9.4472e-07	4.32862e-05	0.818955	1.79072e-09	4.2041e-08	0.69184	0.000511177	0.0127374	-0.12177	0.694208	0.94644	1.21306	0.106585	0.2854
Ahsa1	-0.478032	0.00336565	0.036313	-0.623957	1.70497e-08	3.26356e-07	-0.574248	0.00197179	0.035949	-0.0945695	0.708278	0.950822	-0.39493	0.106788	0.285649
Calhm2	-0.527745	0.000243925	0.0046735	-0.902854	3.91473e-09	8.47582e-08	-0.439098	0.00846101	0.0979662	0.36572	0.239898	0.745786	-0.490043	0.110053	0.291268
Rpusd2	-0.484168	0.00219974	0.0265177	-0.668805	3.94757e-08	6.92037e-07	-0.242759	0.260033	NA	0.30514	0.307413	0.799122	-0.387192	0.110257	0.291471
Selm	-1.32694	2.95716e-19	8.5813e-17	-1.39094	2.71451e-21	2.84381e-19	-1.38979	9.34256e-17	5.28309e-14	-0.159867	0.570525	0.908884	-0.584325	0.110719	0.292184
Gm16515	0.710693	3.22575e-07	1.68915e-05	-0.430239	0.452428	NA	0.79072	7.45188e-07	5.16404e-05	1.44189	0.0143133	0.224077	0.558285	0.110713	0.292184
Ropn1l	0.585459	0.000769776	0.0117956	0.733462	6.82553e-07	9.04777e-06	0.208734	0.282662	0.687022	-0.609376	0.0486008	0.418846	0.934717	0.110918	0.292465
Myb	-0.630426	3.19573e-05	0.000892051	-0.373072	0.000339976	0.00197636	-0.657935	0.000105171	0.00354919	-0.410716	0.0914199	0.534998	-0.379961	0.111104	0.292755
Ids	0.670261	0.000130798	0.00283338	0.629146	3.4079e-05	0.000277386	0.340025	0.151957	NA	-0.323491	0.32955	0.809488	0.822513	0.111147	0.292767
Tssc4	-0.703344	0.00013355	0.00287115	-0.886187	5.6721e-12	2.0544e-10	-0.586257	0.00737584	0.0895712	0.0976316	0.792045	0.96805	0.20821	0.112667	0.295357
Hbp1	0.677119	2.7973e-05	0.000798435	0.0257802	0.902552	0.943516	0.810956	1.46951e-05	0.000736286	0.88353	0.133135	0.62195	0.542629	0.114009	0.297421
Nfil3	0.828172	3.84713e-07	1.9701e-05	1.28784	2.3088e-14	1.13039e-12	0.247724	0.20551	0.612874	-1.18662	0.00854772	0.173242	0.858491	0.114552	0.298341
Ruvbl2	-0.529851	0.00036162	0.00648263	-0.451469	0.220182	0.358256	-0.444681	0.0105569	0.115241	-0.0826083	0.807717	0.972591	-0.212463	0.114673	0.298543
Sccpdh	0.94942	5.18505e-07	2.57938e-05	1.37061	1.6463e-12	6.5469e-11	0.431418	0.0338163	0.236747	-0.999493	0.000213579	0.0169971	0.459846	0.115969	0.300629
Tmprss4	-0.770233	1.51037e-06	6.5133e-05	0.066436	0.922055	NA	-0.717831	1.53794e-05	0.000758656	-0.831645	0.199004	0.707808	-1.04369	0.116181	0.300934
Mtmr12	0.552238	0.000127133	0.00277996	0.574637	5.34548e-06	5.55827e-05	0.35401	0.0150412	0.143795	-0.314843	0.194117	0.703636	0.324619	0.116933	0.302392
St6gal1	0.71034	3.25902e-08	2.17755e-06	0.0750093	0.71287	0.810537	0.805051	4.82194e-09	6.10589e-07	0.702426	0.0285138	0.325161	0.46787	0.118386	0.304974
Aoc2	-0.499882	0.00254602	0.0295776	-0.65089	0.00132194	0.00618814	-0.390654	0.0316929	0.2272	0.123746	0.732004	0.954947	-0.368319	0.119219	0.306131
Pck2	-0.498604	0.000319929	0.00587901	-0.472049	1.35188e-05	0.000123097	-0.674066	1.34869e-05	0.000678193	-0.32893	0.0864509	0.525278	-0.257987	0.119671	0.306984
Sdhaf2	-0.384009	0.00478168	0.0466741	-0.66677	3.33577e-08	5.93073e-07	-0.380094	0.0220272	0.181913	0.194438	0.629647	0.93001	-0.170347	0.120859	0.309285
Nolc1	-0.583922	7.61267e-05	0.00183138	-0.535769	4.01816e-06	4.31155e-05	-0.851833	2.03112e-07	1.6941e-05	-0.495146	0.0894329	0.529797	-0.56991	0.121222	0.309903
Rps11	-0.724866	2.65451e-06	0.000107798	-0.719635	1.97337e-11	6.53963e-10	-1.04406	1.44168e-09	1.98824e-07	-0.490945	0.0109684	0.19732	-0.184102	0.122649	0.312488
Syap1	0.53149	0.00149049	0.0198521	0.536453	0.00117672	0.00564213	0.310667	0.132627	0.501864	-0.32524	0.349938	0.821158	0.434228	0.124732	0.315714
Pfkfb3	-0.692751	5.47542e-07	2.69495e-05	-0.459371	0.148043	0.267458	-0.637599	3.48728e-05	0.00145432	-0.300669	0.45943	0.874243	-0.52795	0.124892	0.315993
Dph2	-0.553397	0.00179043	0.0228797	-1.00212	5.45265e-07	7.36826e-06	-0.0664269	0.760776	NA	0.846938	0.0900264	0.531035	-0.254147	0.127437	0.319582
Baiap3	-0.51771	0.00163834	0.0213675	-0.114009	0.708851	0.807003	-0.471253	0.0120416	0.12589	-0.5738	0.233393	0.73878	-1.07708	0.127769	0.3201
Rab3il1	-0.593328	0.000102245	0.00233146	-0.244189	0.713509	NA	-0.509037	0.00462569	0.0649509	-0.37264	0.56253	0.907654	-0.715578	0.128735	0.321721
Cct3	-0.537721	5.14346e-05	0.00134163	-0.865859	2.36997e-08	4.3916e-07	-0.337897	0.0654356	0.34935	0.406154	0.263671	0.769678	-0.183288	0.129269	0.322214
Vpreb3	-1.19956	6.04947e-13	9.25968e-11	-1.3769	1.85446e-05	0.000161958	-1.10945	4.91925e-09	6.173e-07	-0.00525623	0.995788	1	-0.585633	0.129565	0.322578
Sash1	-0.475904	0.00196943	0.0245969	0.389907	0.494768	NA	-0.423821	0.00648324	0.0821702	-1.08935	0.0347928	0.354556	-0.885076	0.130019	0.323261
Tmem9b	0.465785	0.00377584	0.0390161	0.256834	0.26578	0.410149	0.548441	0.00350808	0.0533679	0.272471	0.41702	0.854297	0.24389	0.130046	0.323265
Cd74	-0.53798	0.00196093	0.0245377	-0.118951	0.848127	NA	-0.479028	0.00979664	0.109516	-0.519459	0.375588	0.833292	0.73502	0.130793	0.324129
Fam117a	0.520081	0.000450625	0.00774909	1.89528	6.44967e-25	1.01353e-22	-0.0613323	0.704558	0.9179	-2.14377	2.03194e-13	5.72438e-10	0.94244	0.131051	0.32446
C330007P06Rik	-0.466173	0.000923768	0.0136349	-0.116898	0.789585	NA	-0.396307	0.0125804	0.12961	-0.337115	0.445165	0.865866	-0.465031	0.131373	0.324807
H2afv	0.635523	8.61335e-05	0.00202661	0.6235	2.75141e-07	4.01903e-06	0.351517	0.0376959	0.253288	-0.369889	0.224766	0.731241	0.452889	0.133274	0.327336
Acy1	-0.885498	1.14039e-07	6.8174e-06	-1.2295	4.29905e-10	1.1413e-08	-0.768263	7.97197e-05	0.0028842	0.335141	0.353835	0.823694	-0.242364	0.134421	0.328951
Cass4	-0.626314	2.8367e-05	0.000806375	-1.35954	2.33583e-07	3.46392e-06	-0.517302	0.0027345	0.0449161	0.604221	0.557808	0.906366	-0.442968	0.136488	0.332395
Marcksl1	0.545909	0.00152547	0.0202558	0.661972	1.60338e-10	4.64934e-09	0.337353	0.0857849	0.401646	-0.420024	0.395035	0.843233	0.410304	0.136725	0.332675
Dph5	-0.498122	0.000587029	0.00957462	-0.916595	1.06325e-05	0.000101164	-0.355679	0.0267787	0.205249	0.41275	0.475284	0.87986	-0.582898	0.1384	0.335154
Aurka	-0.494722	0.00102503	0.0149036	-0.973811	4.19395e-09	9.02023e-08	-0.273786	0.104916	0.444189	0.610525	0.0431716	0.396424	0.294552	0.138646	0.335446
Slc26a2	0.650599	7.78099e-05	0.00186864	0.818046	5.01419e-12	1.85754e-10	0.0235458	0.903279	0.981301	-0.925357	0.00517914	0.131685	0.247483	0.142242	0.340515
Ftsj3	-0.474675	0.00169325	0.0219085	-0.880207	0.000102758	0.000718715	-0.370688	0.0213038	0.177902	0.420743	0.475179	0.879781	-0.361632	0.143083	0.342094
Ypel3	0.756303	9.63246e-06	0.000321752	1.10874	1.37499e-13	6.26007e-12	0.0639638	0.762291	NA	-1.11937	0.00113153	0.0504388	0.502425	0.143408	0.342665
Scn4a	-0.878483	1.11265e-08	8.46888e-07	-0.0690822	0.91587	NA	-0.803705	3.61164e-06	0.000212264	-0.899991	0.14104	0.639291	-0.807412	0.145524	0.344943
Il16	-0.535893	0.000157449	0.0032733	0.329481	0.580366	NA	-0.468944	0.00180994	0.033832	-0.995319	0.0687293	0.476253	0.367692	0.149901	0.350501
Dgke	0.451475	0.00374862	0.038937	0.29251	0.672227	NA	0.523611	0.00430558	0.0616366	-0.0339905	0.972956	1	-0.330198	0.150291	0.351221
AA986860	-1.78389	3.83496e-23	1.84197e-20	-0.66498	0.295255	NA	-1.75597	2.72796e-21	2.92291e-18	-1.38096	0.0288323	0.326717	-0.798292	0.15176	0.352909
Rmnd5a	0.576728	0.000136228	0.00289788	0.522324	2.26768e-06	2.6085e-05	0.499815	0.004287	0.061497	-0.0832387	0.737296	0.956906	0.301945	0.152643	0.35403
Rab3d	0.508331	0.00261362	0.0300869	0.672329	4.46246e-07	6.14962e-06	0.0475238	0.804064	0.949571	-0.702632	0.00285088	0.0912671	0.402305	0.153417	0.35493
Thyn1	-0.525171	0.000427763	0.0074386	-0.939092	1.2721e-09	3.06026e-08	-0.137397	0.449322	0.800333	0.708729	0.114283	0.583471	-0.196952	0.155431	0.357794
Snx13	0.549603	0.000929507	0.0136862	0.370758	0.00243949	0.0102448	0.558442	0.0044835	0.0634017	0.183321	0.569232	0.908475	0.363904	0.15641	0.359076
Rbm28	-0.482744	0.000553676	0.00913762	-0.834018	7.52151e-06	7.50072e-05	-0.414193	0.00744655	0.0899592	0.316476	0.235019	0.740536	-0.371021	0.158572	0.362474
Gm17296	-0.559758	5.80649e-05	0.00146519	-0.284214	0.0113028	0.0358475	-0.681378	1.24724e-05	0.000638706	-0.552562	0.0247436	0.298918	-0.503384	0.158995	0.362922
Map4k5	0.399722	0.00400571	0.0409058	0.368177	0.0180828	0.0522326	0.378107	0.0128021	0.130922	-0.066697	0.745666	0.959617	0.550258	0.15915	0.36321
Zfp455	-0.649313	3.96263e-05	0.00107176	-1.4469	2.99051e-10	8.23067e-09	-0.0837	0.720342	0.923247	1.24831	0.0398505	0.379023	-0.956089	0.160522	0.365232
Stk38l	0.515915	0.000846165	0.0127144	0.551616	4.46995e-05	0.00035065	0.294375	0.0881961	0.407187	-0.352273	0.252212	0.759926	-0.390763	0.162143	0.368001
Acap1	-0.590281	8.95274e-05	0.00208798	-0.959352	9.30185e-07	1.19247e-05	-0.467301	0.00471456	0.0658	0.388872	0.16984	0.67296	-0.399027	0.165709	0.373503
Chek1	-0.490617	0.000588991	0.00958418	-0.732872	3.43969e-06	3.77266e-05	-0.388884	0.0263183	0.203321	0.257223	0.505394	0.889625	-0.244752	0.166177	0.374074
Lrrc36	-0.593943	0.00239905	0.0282233	0.852265	0.158178	NA	-0.590506	0.00248531	0.0419833	-2.09795	0.00103971	0.0480934	-1.16717	0.166977	0.375104
Mtfr1	0.441693	0.00159198	0.0209392	-0.613249	0.15245	NA	0.51782	0.00149311	0.0295	1.06706	0.00942815	0.184355	0.288184	0.170462	0.380056
Fen1	-0.438165	0.00499522	0.0481179	-0.604998	2.4584e-06	2.81129e-05	-0.44732	0.0100795	0.111426	0.0456248	0.895215	0.984919	0.164956	0.171317	0.381592
Sike1	0.641376	6.49417e-05	0.00160956	0.63247	2.26526e-09	5.20529e-08	0.322122	0.0942249	0.423374	-0.384688	0.186394	0.691115	-0.306919	0.171911	0.382485
Dnahc1	-0.439261	0.00499001	0.0481179	-0.804332	9.70057e-05	0.000685868	-0.336213	0.0572366	0.324745	0.410313	0.391968	0.841029	-0.46261	0.172265	0.382872
Plk1s1	0.487061	0.00154132	0.0204272	0.50901	1.2504e-05	0.000115692	0.24351	0.175071	0.576358	-0.319123	0.309885	0.79947	0.437338	0.172721	0.383383
Gzmm	-0.481226	0.00248078	0.0289889	-0.837183	0.000227058	0.00141176	-0.349923	0.0423928	0.272977	0.320082	0.568038	0.908205	-0.765121	0.172736	0.383383
Lgals1	-0.687499	0.000298779	0.00553416	-1.33492	4.07035e-14	1.92512e-12	-0.373175	0.0839969	0.396877	0.790255	0.0576755	0.446331	-0.252499	0.178058	0.390438
Bfsp2	-0.608129	2.11479e-06	8.89936e-05	-0.236926	0.391118	0.538306	-0.543232	0.00016744	0.00519437	-0.428114	0.223144	0.730179	-0.386608	0.179986	0.392673
Rcc2	-0.483485	0.00111316	0.0159191	-1.03831	1.03946e-07	1.65211e-06	-0.389009	0.0264124	0.203709	0.542849	0.130387	0.618275	-0.295796	0.179939	0.392673
Tomm40	-0.437097	0.00249706	0.0291059	-0.263666	0.0327234	0.083637	-0.572305	0.000872525	0.0196339	-0.452958	0.0394069	0.37686	-0.25684	0.181702	0.394434
Sla	-0.643095	0.000161743	0.00333273	-0.484586	0.46773	NA	-0.591166	0.000448808	0.0114985	-0.217122	0.786374	0.967607	-0.35812	0.185257	0.398762
Guca1a	-0.777005	7.13526e-07	3.41536e-05	0.3552	0.603005	NA	-0.717167	2.7931e-05	0.001212	-1.47251	0.0301911	0.331467	-0.446431	0.186302	0.400132
Fubp3	-0.393916	0.00276473	0.0312961	-0.743155	5.71335e-10	1.46874e-08	-0.279907	0.0595071	0.331541	0.36046	0.104872	0.564088	0.530981	0.186574	0.400513
Tmem170	0.529345	0.00156859	0.0207491	0.534785	0.000134678	0.000912493	0.0968955	0.647463	NA	-0.522698	0.0768505	0.501348	0.762095	0.186653	0.400548
Vamp3	0.578969	0.000461629	0.00791875	0.658742	1.28984e-08	2.52347e-07	0.504904	0.0109169	0.117877	-0.200209	0.454359	0.871237	-0.404186	0.187722	0.401559
Isy1	-0.603723	5.46095e-05	0.00140084	-1.17866	5.92163e-21	6.00984e-19	-0.204913	0.219102	0.628184	0.880896	0.00180318	0.0692086	0.222392	0.19278	0.40841
Paip2b	0.501428	0.00212238	0.0258641	0.442376	5.25245e-05	0.000404543	0.283579	0.202064	0.610074	-0.244353	0.556216	0.906083	-0.533677	0.193286	0.408939
1810009A15Rik	-0.759359	4.78698e-05	0.00126045	-0.975817	7.15068e-10	1.8143e-08	-0.335261	0.174183	NA	0.469741	0.262955	0.769175	-0.335526	0.195156	0.411524
Rassf4	-0.567873	0.000271701	0.00514202	-0.343703	0.0209075	0.0585181	-0.684146	0.000105235	0.00354919	-0.456319	0.12121	0.598663	-0.550075	0.19552	0.411821
1110004E09Rik	-0.466944	0.00517478	0.0493358	-0.279585	0.0284912	0.0748219	-0.795405	8.53959e-05	0.00304508	-0.697771	0.00943632	0.184355	-0.33535	0.195662	0.412053
Zc3h7a	0.354936	0.0049686	0.0480275	0.491142	0.000194254	0.00122926	0.439648	0.00579054	0.0756627	-0.0790978	0.891127	0.983886	0.385525	0.197919	0.41483
Ucp2	-0.391831	0.00236152	0.027876	-0.0967157	0.238712	0.380077	-0.545831	0.000455171	0.0116332	-0.576557	0.0175341	0.253319	-0.297116	0.198362	0.415574
Mmp9	-0.671701	0.000203837	0.00403876	-1.3672	0.0258003	NA	-0.59417	0.00158411	0.0309034	0.913526	0.121515	0.599321	0.96587	0.199439	0.416843
Tomm40l	-0.50931	0.00212822	0.0259126	-0.784766	0.000138809	0.000933991	-0.29507	0.127318	0.490493	0.357632	0.517896	0.894207	-0.232401	0.20152	0.419475
Etfb	-0.634266	7.28663e-06	0.000253739	-0.710567	9.702e-09	1.949e-07	-0.651321	0.000161051	0.00502976	-0.0872738	0.742113	0.958582	-0.362164	0.203954	0.422955
Snx25	0.429112	0.00427122	0.0429466	1.1931	1.49003e-09	3.54947e-08	0.402787	0.0110547	0.118774	-0.898013	0.00478762	0.125134	0.292769	0.205434	0.424977
Usp3	0.427043	0.00297243	0.0331856	0.396455	0.000336312	0.00196327	0.399014	0.0128018	0.130922	-0.0442929	0.84399	0.978554	0.312463	0.205797	0.425256
Npb	0.714088	9.81721e-05	0.00226773	0.657145	0.00091715	0.00459188	0.833401	0.000103673	0.00353071	0.205163	0.699842	0.947796	1.09155	0.209456	0.429559
Chpt1	0.483579	0.00488104	0.0474777	0.700289	1.78359e-05	0.000157216	0.203906	0.244405	0.654549	-0.55846	0.0165265	0.243507	-1.08509	0.211222	0.43123
A630007B06Rik	0.499732	0.000334437	0.00608937	0.522417	8.93871e-05	0.000637554	0.299925	0.0714646	0.366481	-0.317948	0.244734	0.751579	0.318534	0.212606	0.433053
Pnrc1	0.527931	0.000474928	0.00805757	1.10339	0.0005766	0.00309522	0.586952	0.000986073	0.0215282	-0.64493	0.182547	0.685078	0.329825	0.215546	0.436844
Ptgr1	-0.553469	0.000204709	0.00405028	-1.23272	2.41605e-13	1.06034e-11	-0.177717	0.2918	0.694191	0.968269	7.17358e-05	0.00769499	-0.303462	0.215747	0.436863
Cpt2	0.455853	0.0028769	0.0324472	0.482672	4.01888e-05	0.000319379	-0.0655932	0.731519	0.92664	-0.665459	0.0348307	0.354556	0.24757	0.215798	0.436868
A930004D18Rik	-0.702279	3.22613e-06	0.000124824	-0.17115	0.802376	NA	-0.622231	0.000426354	0.010957	-0.527818	0.464959	0.876163	-0.529226	0.218831	0.440284
Socs1	0.464175	0.00202913	0.02512	0.889018	3.63121e-12	1.37848e-10	-0.0814094	0.683524	0.909434	-1.16691	0.00035592	0.0245879	-0.40931	0.219036	0.440628
Mybbp1a	-0.622963	0.000133624	0.00287115	-0.45418	0.000341679	0.00198345	-0.785833	5.68713e-05	0.00219435	-0.495466	0.0686969	0.476253	-0.297302	0.219231	0.440865
Klf6	0.439154	0.0047353	0.0463514	0.319061	0.0177741	0.0515702	0.397992	0.0404577	0.265818	0.0316053	0.920617	0.990817	0.52166	0.221478	0.443233
Ubxn7	0.458799	0.00361344	0.0381249	0.388474	0.00100847	0.0049699	0.416315	0.02425	0.193255	-0.00246019	0.992736	1	0.312114	0.22221	0.443933
Chfr	0.438259	0.00475439	0.0464403	0.457717	0.000609085	0.0032437	0.225705	0.181114	0.58234	-0.309263	0.336716	0.813793	0.181263	0.223044	0.444764
4930522L14Rik	0.462564	0.00255089	0.0295875	0.365781	0.0736298	0.157873	0.610768	0.00536759	0.0722627	0.233987	0.682086	0.944143	0.780406	0.223433	0.445003
Bst2	-0.86772	5.24679e-06	0.000189825	-1.17772	2.50633e-11	8.22194e-10	-0.611513	0.00935271	NA	0.383654	0.27856	0.778134	-0.252818	0.224189	0.445626
Nr1h5	-0.642202	0.00117681	0.0166248	-0.186715	0.788213	NA	-0.597928	0.00295658	0.0473904	-0.376755	0.704552	0.949432	-0.81829	0.229888	0.452541
Papss2	-0.485425	0.000716177	0.011196	0.776124	0.26017	NA	-0.422344	0.00562578	0.0741358	-1.71867	0.0135564	0.218985	-0.697329	0.230611	0.453229
Blnk	-0.48987	0.000873189	0.0130221	-1.00581	0.000281786	0.0016895	-0.399488	0.00964203	0.108134	0.314099	0.714754	0.951444	-0.328099	0.231186	0.454175
Ada	0.445684	0.00497294	0.0480361	0.00263046	0.987163	0.992153	0.530674	0.00392288	0.0580678	0.511208	0.127633	0.611212	0.275813	0.232667	0.455903
Txndc16	0.462598	0.00264604	0.0302687	0.379377	0.0475149	0.112366	0.532676	0.00290205	0.0467876	0.122456	0.649827	0.935174	0.218595	0.233996	0.457663
BC030307	-0.419458	0.00338943	0.0365131	-0.768939	2.39375e-05	0.000201228	-0.306859	0.0731185	0.370891	0.331914	0.687947	0.945058	-0.616064	0.234567	0.45836
Bin1	-0.757801	2.03843e-07	1.13121e-05	-0.362928	0.510923	NA	-0.681956	4.89575e-05	0.00196521	-0.583656	0.247915	0.755055	-0.224758	0.234769	0.458613
Serac1	0.402488	0.00350989	0.0372801	0.42619	0.000186793	0.00119496	0.201715	0.201689	0.609995	-0.321024	0.146584	0.644697	0.583262	0.237812	0.462011
Pde4c	0.476341	0.00271386	0.0308583	-0.0344161	0.946907	NA	0.557343	0.00247308	0.041912	0.595903	0.185872	0.690777	0.46172	0.238623	0.463094
Spef1	0.519556	0.00174628	0.0224805	0.556547	5.12207e-06	5.36029e-05	0.584001	0.00315854	0.0494885	0.00853465	0.975365	1	-0.545626	0.240994	0.466561
Lrpprc	-0.365295	0.00514689	0.0492045	-0.393603	0.00338866	0.0134429	-0.361586	0.0127833	0.130922	-0.0750884	0.703806	0.949053	-0.25531	0.241438	0.467066
Dbndd2	0.552689	0.00224169	0.0267741	0.534202	0.167825	NA	0.574242	0.00420691	0.0607234	-0.120391	0.769107	0.964991	0.575376	0.242801	0.468996
Tnf	-1.23316	3.04813e-15	6.24374e-13	-1.64448	3.2298e-28	6.84085e-26	-0.602754	0.000200147	0.0059697	0.886237	0.0504491	0.424001	-0.736633	0.243646	0.469841
Rrp15	-0.670461	3.94029e-06	0.000149142	-1.03178	5.96266e-13	2.50406e-11	-0.52791	0.00109294	0.0232979	0.365701	0.437196	0.862876	-0.453805	0.243779	0.469884
Slc6a6	-0.453804	0.00135346	0.0185554	-0.805976	7.86405e-09	1.59624e-07	-0.354832	0.0281124	0.211368	0.355327	0.177579	0.680623	-0.44153	0.246975	0.474183
Xpo5	-0.503447	0.000183719	0.00373035	-0.606083	2.04794e-06	2.4011e-05	-0.513268	0.000767054	0.017748	-0.0438088	0.866319	0.981654	-0.315511	0.247039	0.474235
Gm5506	-0.49748	0.00263407	0.0302473	1.40714	0.0445677	NA	-0.449543	0.0137823	0.136539	-3.49731	0.000275224	0.0206213	1.08833	0.251183	0.479377
Psme4	0.675585	2.72412e-05	0.000779143	0.425281	0.000235382	0.00145029	0.719161	0.000259219	0.00725032	0.289852	0.376555	0.833757	0.20826	0.253342	0.481626
Caprin2	0.705862	3.12757e-05	0.000876537	0.765729	7.15847e-13	2.99335e-11	0.256319	0.18417	0.586966	-0.58345	0.0776619	0.504101	-0.578656	0.253429	0.481719
Gm15409	-0.567123	0.00111591	0.0159388	-0.368209	0.0113753	0.0360303	-0.876345	3.03499e-07	2.40195e-05	-0.678479	0.0275458	0.31935	0.649292	0.253918	0.482115
Astl	-0.445134	0.00347663	0.037049	-0.520147	0.00951669	0.0311668	-0.371127	0.0293628	0.21755	0.0615035	0.879588	0.982682	0.780687	0.25919	0.488017
Sesn3	0.997256	3.4336e-08	2.26667e-06	1.47524	1.22676e-22	1.37382e-20	0.565702	0.00105448	0.0226664	-0.942059	0.0107631	0.195768	-0.623618	0.261064	0.490389
Xpot	-0.516501	6.94509e-05	0.00170314	-0.69854	4.0512e-08	7.08632e-07	-0.492731	0.00120087	0.0252291	0.068908	0.791612	0.967989	-0.20932	0.265815	0.495592
Eaf2	0.609535	3.38561e-05	0.000937539	-0.493906	0.0467339	0.111056	0.826589	7.23839e-06	0.000390789	1.34395	0.0383639	0.37282	-0.643822	0.269153	0.499843
Tmem189	0.470096	0.00283824	0.0320372	0.39838	0.470266	NA	0.530934	0.00521517	0.0707378	0.0170903	0.977287	1	0.147383	0.269489	0.499932
Stoml1	-0.655299	0.000220526	0.00429009	-1.18923	1.96736e-14	9.72992e-13	-0.156731	0.438264	0.792518	0.949215	0.00276994	0.0896952	-0.187543	0.270132	0.500717
Vipr1	-0.621342	0.000159763	0.00331392	0.572722	0.268439	NA	-0.560959	0.00350252	0.0533679	-1.48646	0.0143345	0.224077	-0.762968	0.275257	0.506683
Gm9776	-0.572107	0.00122532	0.0171878	-0.721692	1.3833e-07	2.14952e-06	-0.532991	0.0081908	0.0956325	0.0455722	0.878593	0.982682	0.339165	0.277176	0.508454
Stra13	-0.545689	0.000875767	0.0130366	-1.27062	3.80692e-18	2.85314e-16	-0.106146	0.580609	0.865334	1.08072	5.45274e-05	0.00630399	-0.215769	0.279526	0.510857
Bcr	-0.524871	8.83167e-05	0.0020675	-0.142494	0.502805	0.640035	-0.469921	0.00278051	0.0455644	-0.470451	0.144937	0.644212	-0.257098	0.279624	0.510889
Tram2	0.412341	0.00433524	0.0433804	0.522335	0.000228707	0.0014198	0.227023	0.15368	0.54124	-0.389862	0.144655	0.644203	0.430667	0.2853	0.51726
Tmem43	-0.477943	0.00424601	0.0428459	-0.821446	2.89905e-06	3.23916e-05	-0.330419	0.0706186	0.363775	0.390007	0.157266	0.658711	-0.192557	0.287757	0.519427
Ubxn2a	0.472384	0.00437046	0.0436388	0.424655	0.00083985	0.00424412	0.430224	0.012165	0.126452	-0.0307506	0.891052	0.98388	-0.163035	0.29071	0.522468
Fam83e	-0.487597	0.0016091	0.0210925	-0.60305	0.00151902	0.00695153	-0.389217	0.0324928	0.231342	0.131249	0.696213	0.94717	0.891841	0.29188	0.523465
Emilin1	-0.860134	7.13993e-08	4.44639e-06	-0.125717	0.823165	NA	-0.799857	1.65825e-06	0.00010844	-0.805547	0.100616	0.555907	-0.68473	0.29733	0.529293
Atp5j2	-0.390017	0.0050921	0.0488484	-0.834141	0.00445864	0.0167918	-0.308304	0.0648011	0.347792	0.589868	0.269894	0.773452	-0.219104	0.298231	0.530234
Eaf1	-0.449322	0.00182607	0.0232925	-0.347169	0.0012485	0.00591639	-0.829787	1.67741e-07	1.42788e-05	-0.646113	0.00455677	0.122728	-0.465843	0.300626	0.533003
Megf10	-0.55394	0.00129863	0.0179505	-0.169674	0.712373	NA	-0.500347	0.00376938	0.0561536	-0.483597	0.311226	0.800115	-0.843577	0.301464	0.533826
Grina	0.54267	0.00157926	0.0208584	0.641979	2.14245e-06	2.47614e-05	0.0718877	0.7442	NA	-0.695639	0.0463735	0.411397	0.179386	0.305921	0.538208
2310014L17Rik	-0.418093	0.0045854	0.0452979	-0.662936	0.000189617	0.00120906	-0.334285	0.0609797	0.335733	0.260002	0.588896	0.916058	-0.519507	0.306119	0.538408
Tifa	-0.441612	0.00220374	0.0265198	-0.816271	3.88364e-06	4.19029e-05	-0.369966	0.0199716	0.170561	0.366222	0.205255	0.713002	-0.197078	0.308256	0.540825
Nop14	-0.414583	0.00315247	0.034635	-0.47571	0.000706161	0.00367292	-0.472342	0.00329741	0.0509932	-0.134779	0.658298	0.93746	-0.221522	0.309004	0.541096
Klhl36	0.476113	0.00147635	0.0197542	0.434705	0.00222816	0.00954241	0.368358	0.0473245	0.290133	-0.139856	0.580992	0.913784	0.242293	0.313042	0.544802
Zbtb10	0.410038	0.00480282	0.0468149	0.411496	0.00265894	0.0110521	0.401246	0.0146662	0.141391	-0.101169	0.704981	0.949547	-0.20723	0.318134	0.550641
Srcrb4d	0.489639	0.000398551	0.00700936	-0.252605	0.66939	NA	0.562078	0.000725343	0.0169803	0.767	0.194474	0.704385	-0.495493	0.318581	0.550782
Rab11fip2	0.456635	0.00404051	0.0411405	0.331014	0.0044272	0.0166928	0.468047	0.00733982	0.089246	0.107346	0.629216	0.93001	0.343143	0.318512	0.550782
Cyb561d2	-0.477841	0.00474175	0.0463819	-0.971885	0.000493044	0.00269721	-0.242423	0.202976	0.61012	0.693348	0.286095	0.784675	0.207957	0.318701	0.550822
Gpkow	-0.43625	0.00518451	0.0493947	-0.761916	7.42209e-08	1.21535e-06	-0.11664	0.564527	0.858505	0.556531	0.0225066	0.285784	0.232333	0.321907	0.553888
Sirt4	-0.830538	6.99868e-07	3.37317e-05	-1.3046	5.66791e-12	2.0544e-10	-0.487536	0.0174259	0.157002	0.662019	0.260225	0.768133	-0.421355	0.323058	0.554558
2410089E03Rik	0.399097	0.00374759	0.038937	0.45775	0.000172795	0.00111863	0.208054	0.172678	0.573083	-0.369543	0.268852	0.773358	0.153518	0.324999	0.556654
Dtymk	-0.477462	0.000546522	0.00903026	-0.774741	3.63615e-12	1.37848e-10	-0.415964	0.0243174	0.193442	0.210186	0.54415	0.902137	-0.23252	0.325988	0.5579
Ndufs5	-0.647465	1.4468e-05	0.000452864	-0.713837	1.33508e-07	2.0779e-06	-0.915433	2.52579e-05	NA	-0.405771	0.139318	0.635061	0.279192	0.328042	0.560814
Btk	-0.595005	0.000131	0.00283338	-0.896861	0.0136914	0.0417906	-0.5165	0.00135527	0.0274681	0.520016	0.602636	0.922055	-0.287433	0.329184	0.56194
Plcg2	-0.51061	5.00386e-05	0.00130767	0.0657665	0.597251	0.720838	-0.513047	0.000994118	0.0216699	-0.749856	0.055677	0.440599	-0.194372	0.329736	0.561979
Txnip	-0.543535	0.000100972	0.00231702	-0.706478	6.90853e-07	9.13295e-06	-0.350241	0.0277871	0.210237	0.268998	0.659232	0.93746	0.294729	0.330014	0.562152
Casc1	-0.603218	6.63429e-05	0.00163846	-0.00714521	0.979656	0.987723	-0.541523	0.00176875	0.0333973	-0.644457	0.0876625	0.527023	0.831125	0.330331	0.56239
Rps28	-0.432561	0.00319884	0.0348644	-0.408436	0.000210921	0.00132239	-0.676432	3.39655e-05	0.00142481	-0.401885	0.14834	0.647709	-0.206139	0.330445	0.562511
Lsm1	0.456979	0.00292877	0.0328196	0.640418	5.03506e-06	5.28058e-05	0.0662803	0.720743	0.92331	-0.699402	0.0269708	0.315279	0.309249	0.334153	0.566705
Lmbr1l	0.609886	0.000104901	0.00237158	0.845039	4.34519e-11	1.36565e-09	0.466522	0.0100545	0.111327	-0.460617	0.178274	0.681007	0.2554	0.336962	0.569691
Gpr18	-0.634317	0.000472098	0.00802913	-0.668272	0.0261679	0.0701	-0.585608	0.00236176	0.0405135	-0.104948	0.866345	0.981654	0.354598	0.339005	0.571593
Ddx6	0.425246	0.00449043	0.0445176	0.189619	0.112912	0.218318	0.477497	0.00375988	0.0560778	0.208694	0.502529	0.887838	0.239219	0.339662	0.572019
Slc15a4	0.438023	0.00343788	0.036779	-0.043021	0.941549	NA	0.509581	0.00430229	0.0616366	0.470691	0.367991	0.828852	0.165874	0.340117	0.572619
Fbxo8	0.423485	0.00312036	0.0344401	0.519053	1.21075e-05	0.000112883	0.330741	0.0481936	0.292741	-0.259264	0.416379	0.854145	-0.290399	0.340301	0.572718
Syngr4	-0.687716	4.38886e-06	0.000163894	-1.1706	1.39751e-14	7.07619e-13	-0.0416539	0.810554	0.951661	1.06194	0.00900092	0.179331	-0.231185	0.341999	0.57421
Bhlhe41	0.703293	0.000199356	0.00397827	0.735534	0.000194299	0.00122926	0.773339	0.000286399	0.00785285	0.0628237	0.870228	0.98185	0.617672	0.343902	0.575892
Ebpl	0.503253	0.000793489	0.0120792	0.462152	1.53147e-05	0.000137649	0.0592962	0.745988	0.931818	-0.497005	0.0498299	0.42258	0.301685	0.348028	0.58004
Rrp12	-0.538326	0.000306782	0.00566732	-0.639329	0.000172376	0.00111815	-0.52373	0.00162295	0.0313974	0.0044297	0.986841	1	-0.273408	0.350354	0.581811
Stmn1	0.638166	0.000160952	0.00332145	0.576948	4.61526e-09	9.86106e-08	0.87728	6.34376e-06	0.000346518	0.278043	0.457107	0.873542	0.30513	0.352159	0.582849
Pth1r	-0.495713	0.00102847	0.014938	0.554266	0.389059	NA	-0.422759	0.0139996	0.137518	-1.35515	0.0329137	0.343845	0.611431	0.352782	0.583048
1700029H14Rik	-0.661552	0.000753164	0.0116435	-0.734267	0.0668263	NA	-0.664642	0.00185766	0.0345466	-0.0691636	0.872582	0.982121	-0.988686	0.356167	0.58673
Adamtsl2	-0.50434	0.00366584	0.0384499	-1.64306	0.0014504	NA	-0.393913	0.0318722	0.228133	1.44197	0.00767959	0.16386	-0.708287	0.357832	0.588258
Gpatch4	-0.518155	0.000340249	0.006171	-0.898522	2.30384e-08	4.28365e-07	-0.293402	0.100568	0.436044	0.478299	0.199111	0.707808	-0.316216	0.358411	0.58857
Samhd1	0.464298	0.0018513	0.0235089	0.688638	1.24101e-05	0.000115044	0.209961	0.216165	0.624941	-0.56181	0.0262815	0.311195	-0.350591	0.359287	0.588754
Asns	-0.485912	0.0033711	0.0363437	-0.767499	3.45593e-08	6.13317e-07	-0.383093	0.0960802	0.4262	0.166582	0.685857	0.944279	-0.146514	0.360424	0.589763
Trib3	-0.452516	0.00409098	0.0415028	-0.591996	0.00126707	0.00597665	-0.433372	0.0277496	0.210068	-0.0135761	0.968118	1	-0.288098	0.360894	0.5901
Ulk2	0.560083	0.000533441	0.00884559	0.50961	3.5506e-06	3.86952e-05	0.542163	0.00142595	0.0284965	-0.0182925	0.951686	0.996169	0.197862	0.363742	0.592933
Sema3g	-0.763884	1.09502e-05	0.000358261	-1.11693	7.64934e-06	7.6204e-05	-0.630046	0.000971373	0.0214004	0.32793	0.350477	0.821401	-0.483975	0.364277	0.593088
Ctps2	0.425048	0.00270549	0.0307882	-0.131779	0.671427	0.777665	0.507647	0.00230156	0.0396272	0.686334	0.13031	0.618236	0.204847	0.365559	0.59415
Nr1h3	-0.556743	0.000387363	0.00685737	-1.44058	5.86397e-17	3.84006e-15	0.226133	0.169673	0.568119	1.58972	1.31931e-05	0.0022943	-0.604694	0.36916	0.596961
Snx30	-0.608273	2.19569e-06	9.21198e-05	-0.297113	0.016782	0.0491898	-0.736302	3.15334e-07	2.48152e-05	-0.55724	0.0509171	0.426155	-0.33448	0.372786	0.600694
Rcn3	0.553699	0.00351034	0.0372801	0.527252	0.357732	NA	0.623046	0.00333356	0.0513641	-0.0582868	0.914903	0.98934	0.704901	0.374151	0.602361
Lpar5	-0.770351	5.68484e-07	2.78817e-05	0.210622	0.735341	NA	-0.693816	9.52646e-05	0.00331735	-1.13843	0.0453874	0.407475	-0.422753	0.378516	0.606938
Echdc1	0.606198	0.000100244	0.00230412	0.599445	4.25043e-08	7.38181e-07	0.571967	0.00226667	0.0392692	-0.0797802	0.762004	0.962826	0.159969	0.378703	0.606994
Eps15	0.480884	0.00223781	0.0267558	0.42195	0.00113915	0.00548898	0.384374	0.0295191	0.218128	-0.111532	0.695592	0.94717	0.236416	0.37939	0.607653
Trim14	0.37886	0.00462316	0.045574	0.513038	1.69682e-05	0.00015084	0.380029	0.0146781	0.141391	-0.215526	0.269412	0.773358	0.295575	0.380188	0.608221
Anxa9	-0.633234	0.00184759	0.0235089	-0.30609	0.609613	NA	-0.60255	0.00287499	0.0465107	-0.259347	0.683189	0.944279	-0.276904	0.38309	0.611484
Mtmr1	0.507959	0.00292367	0.0327889	0.486675	0.00133482	0.00623746	0.404501	0.0439532	0.278031	-0.117642	0.734245	0.955611	-0.177225	0.383313	0.611582
E330020D12Rik	-0.497055	0.00456171	0.0450959	-0.952595	0.0169026	0.0494096	-0.403627	0.0236549	0.190346	0.543393	0.319834	0.80528	-0.251164	0.383329	0.611582
Hsph1	-0.506667	0.0003185	0.00586823	-0.537459	2.73131e-05	0.00022667	-0.506184	0.00122237	0.0255651	-0.0874463	0.748127	0.960177	-0.220836	0.383397	0.611614
M6pr	-0.506282	0.000395556	0.00697081	-0.701754	2.13532e-08	4.00085e-07	-0.501581	0.00239257	0.0408909	0.101366	0.667251	0.939565	-0.142177	0.386871	0.614701
Prpf6	0.503907	0.001057	0.0152412	0.538087	0.0799018	0.168284	0.570229	0.00193078	0.03548	0.0788101	0.848125	0.978916	0.13355	0.387904	0.615343
Hsd17b14	-1.01583	1.59114e-07	9.15826e-06	1.02313	0.108893	NA	-1.04446	2.59524e-07	2.11399e-05	-2.79271	1.80904e-05	0.00286316	-0.753086	0.388696	0.616122
Iffo1	-0.439403	0.00137011	0.01871	-0.633436	0.00604561	0.0215825	-0.363021	0.0141056	0.138072	0.163507	0.688431	0.945058	-0.736059	0.390143	0.617135
Pigl	-0.492009	0.000219388	0.00427392	-1.04231	1.07522e-23	1.41793e-21	-0.343491	0.0231829	0.18785	0.592867	0.00195306	0.0741529	-0.162871	0.392361	0.618794
Slc7a5	-0.383609	0.00264471	0.0302687	-0.0552841	0.66842	0.775473	-0.651022	8.31698e-05	0.00297967	-0.830634	0.035708	0.359787	-0.235325	0.392092	0.618794
Btd	-1.11845	1.78865e-16	4.08429e-14	0.238048	0.0951597	0.191955	-1.32478	1.22156e-17	8.50759e-15	-1.73179	4.99501e-09	4.39748e-06	-0.153204	0.392562	0.618961
Ttc9c	-0.448857	0.00244519	0.0286451	-0.762176	2.38152e-05	0.000200484	-0.223931	0.212324	0.620063	0.466867	0.377198	0.833757	-0.126508	0.393227	0.619627
Rfx4	-0.546819	0.000212862	0.00418189	0.0277945	0.967194	NA	-0.477775	0.00203451	0.0367082	-0.91545	0.161225	0.664003	0.510242	0.39814	0.623397
Tmem160	0.477475	0.00346446	0.0369499	0.523034	0.000148667	0.000988038	0.343761	0.084571	0.39813	-0.191887	0.517765	0.894108	-0.170709	0.399991	0.624808
Dhx58	-0.527071	0.00192309	0.0241757	-1.0661	0.000417065	0.00234611	-0.324943	0.0733977	0.371496	0.665094	0.145252	0.644212	0.227993	0.401587	0.625617
Pes1	-0.600518	0.000125054	0.00274745	-1.16134	5.66861e-09	1.19286e-07	-0.349413	0.0423007	0.27276	0.713633	0.113157	0.581126	-0.0906397	0.403281	0.626987
Spg21	0.529014	0.000233906	0.00450633	0.563713	1.23069e-06	1.52941e-05	0.21187	0.200926	0.608943	-0.456399	0.0786433	0.504909	0.143454	0.403961	0.627536
D10Wsu102e	-0.437665	0.00523392	0.0496278	-0.760314	2.69527e-09	6.0787e-08	-0.063061	0.746321	0.931818	0.608084	0.0113719	0.200482	-0.257718	0.4058	0.629252
Esyt2	0.473758	0.00346017	0.0369323	0.374	0.00115561	0.00555729	0.403946	0.029644	0.218356	-0.0379439	0.903503	0.987099	0.182155	0.409152	0.631925
Col18a1	-0.639522	5.23139e-05	0.00135881	0.454373	0.440001	NA	-0.576909	0.000728164	0.0169951	-1.54562	0.00456912	0.122756	-0.537876	0.425778	0.647187
Gpr137c	0.619637	0.000136271	0.00289788	0.807331	7.52482e-13	3.12467e-11	0.389733	0.0246901	0.194739	-0.454925	0.0622917	0.462513	0.682861	0.425976	0.647256
Cpt1c	-0.46431	0.00295011	0.0329792	-0.944867	2.66061e-05	0.000221558	-0.291866	0.111062	0.458718	0.576516	0.067573	0.474729	0.541115	0.428777	0.649501
Mpv17l	0.445592	0.00221573	0.0266059	0.461494	0.00188377	0.00828228	0.345931	0.0444703	0.279692	-0.156495	0.523168	0.895643	-0.525297	0.430262	0.650824
Uba7	-1.5078	9.7052e-21	3.00408e-18	-0.114262	0.654637	0.765039	-1.5299	6.62973e-17	4.01502e-14	-1.63616	4.57884e-05	0.00575871	-0.131276	0.432217	0.652792
Gpx1	-0.631937	0.000468938	0.00800169	-0.782662	4.68775e-11	1.46858e-09	-0.211171	0.314713	0.713134	0.467612	0.0745856	0.493224	0.152002	0.433823	0.654003
Fyco1	0.457498	0.000880218	0.013071	0.131654	0.22085	0.358923	0.518261	0.000570608	0.0140304	0.337292	0.418427	0.854766	0.164203	0.434877	0.655088
Bnip3	0.539062	0.0021989	0.0265177	0.60247	9.84008e-05	0.000693217	0.136246	0.533218	0.84285	-0.595909	0.204172	0.712402	0.538195	0.442031	0.660794
Apex2	-0.516254	0.000284651	0.00532917	1.15863	0.0984028	NA	-0.445852	0.00538963	0.0723935	-3.02531	0.00217653	0.0792211	-0.233743	0.443192	0.661554
Drg2	-0.48132	0.00260497	0.0300121	-0.57878	0.00109778	0.00532121	-0.424672	0.0217454	0.18056	0.0300384	0.945841	0.995278	-0.155184	0.445924	0.664124
Sirt6	-0.566941	0.000420774	0.00733536	-0.614656	7.08809e-06	7.13422e-05	-0.477855	0.0147615	0.141704	-0.00530005	0.988062	1	-0.139353	0.449852	0.667172
Copg2	0.471974	0.00405697	0.0412779	0.414633	0.000366351	0.00210831	0.477856	0.00811317	0.0951249	0.0379649	0.869583	0.98185	-0.182396	0.459478	0.674131
Car5a	-0.444736	0.00372918	0.0389091	-0.521832	0.0959697	0.193189	-0.373675	0.0231569	0.187815	0.0673612	0.84035	0.978221	-0.333706	0.472963	0.68684
Aaas	-0.493444	0.00176563	0.0226133	-0.869234	1.07039e-10	3.19901e-09	-0.210327	0.196277	0.60272	0.565112	0.0485255	0.418846	-0.104523	0.478015	0.690797
Lrmp	-0.572516	1.26259e-05	0.000405221	-0.370128	0.399735	NA	-0.503041	0.000355423	0.00934093	-0.0699307	0.906467	0.987586	-0.159576	0.47896	0.691693
Btbd19	-0.848803	2.36887e-08	1.6498e-06	-1.10545	6.4786e-05	0.00048592	-0.752353	2.75389e-05	0.00119871	0.239083	0.459932	0.874593	0.222318	0.480903	0.693557
Ppp2r5b	-0.480655	0.0020777	0.0254757	-0.0809489	0.633776	0.750107	-0.850948	9.24855e-06	0.000484297	-0.949589	0.000274519	0.0206213	-0.116059	0.48183	0.69411
Golm1	-0.498367	0.000607333	0.00979114	-0.655876	3.55348e-05	0.000287316	-0.558087	0.00110028	0.0233625	-0.0690146	0.838557	0.978221	-0.161926	0.486583	0.698
Higd2a	-0.674849	1.67097e-05	0.000508187	-0.661063	2.13986e-05	0.00018297	-1.16124	1.03019e-08	1.16663e-06	-0.721655	0.0237648	0.293127	-0.165795	0.491649	0.70249
Tgfbr1	0.660252	0.000106417	0.00239851	0.660552	7.09348e-09	1.46423e-07	0.546321	0.00413873	0.0600108	-0.148823	0.639752	0.933587	0.172233	0.492324	0.702857
Hmgn1	0.527242	0.00117803	0.0166248	0.475816	0.000145181	0.00096817	0.349465	0.0473811	0.290353	-0.215576	0.482631	0.882233	0.1299	0.500962	0.710277
Katnb1	-0.627049	8.51007e-05	0.00201251	-0.442353	0.00950539	0.0311403	-0.663087	0.000199849	0.0059697	-0.346307	0.165005	0.66928	-0.0707935	0.502124	0.711064
Cyb5r4	0.528098	0.00189402	0.0238965	0.514104	1.21725e-05	0.000113273	0.250443	0.21399	0.622793	-0.310208	0.311905	0.800333	0.168878	0.503	0.711673
Sbk1	-0.53328	0.000130896	0.00283338	-0.0303506	0.832031	0.89515	-0.68696	4.56155e-05	0.00185242	-0.832033	0.0105222	0.195343	-0.228817	0.503609	0.71206
Ercc6	0.418232	0.00342705	0.0367478	0.508088	1.06787e-06	1.34595e-05	0.232096	0.12853	0.49333	-0.39508	0.172065	0.674802	0.137731	0.504094	0.712589
Def6	-0.407054	0.00384522	0.0395862	-0.368597	0.00142509	0.00658976	-0.39974	0.0138156	0.136675	-0.135719	0.583912	0.915346	0.140193	0.504735	0.713337
Gfod1	-0.415836	0.00186553	0.0236012	-0.520693	0.00014183	0.000949072	-0.384741	0.015894	0.149082	0.0370909	0.905349	0.987586	0.324503	0.508923	0.716083
Grap2	-0.510079	0.00185559	0.0235089	-0.0228681	0.968218	NA	-0.455679	0.00834362	0.0970103	-0.493759	0.328895	0.809225	-0.257062	0.509335	0.716426
Ube2e3	0.533472	0.000985257	0.0144005	0.00313089	0.992279	0.995067	0.605119	0.00139729	0.028004	0.651593	0.246083	0.752895	0.177417	0.516914	0.722108
Ech1	-0.635462	0.000270088	0.00511845	-0.855336	3.45273e-07	4.93254e-06	-0.49962	0.0106203	0.11548	0.222422	0.613919	0.925495	-0.12527	0.51726	0.722379
Zfp563	-0.481544	0.00376227	0.0390068	-0.0540264	0.923592	NA	-0.413781	0.0189946	0.165836	-0.499175	0.292714	0.789883	-0.381559	0.523009	0.725978
Casc4	0.666424	2.47832e-05	0.000716195	0.653364	2.38764e-06	2.73358e-05	0.47722	0.0120321	0.12589	-0.213377	0.462181	0.875451	-0.360346	0.526467	0.72887
Dgkz	-0.466277	0.00143658	0.0193521	0.16448	0.746508	NA	-0.384767	0.0278088	0.210287	-0.679672	0.10342	0.562394	-0.151135	0.530392	0.731373
Myadml2	0.552565	0.00376818	0.0390068	0.579087	0.00393879	0.0151682	0.442454	0.085435	NA	-0.11049	0.77308	0.965	0.383784	0.530303	0.731373
Cd48	-0.582994	0.000282136	0.0052892	-1.46307	1.24604e-15	7.01741e-14	-0.109491	0.579015	0.864797	1.26742	0.0405127	0.381203	0.116135	0.530658	0.731517
Cml1	-0.581391	0.000798377	0.0121139	-0.89494	3.18316e-06	3.52027e-05	-0.0539683	0.816125	NA	0.753761	0.101057	0.556959	-0.398521	0.531107	0.73169
S100a13	-0.637385	0.000118193	0.00260906	-1.3609	8.21103e-09	1.6632e-07	-0.44767	0.0178434	0.159117	0.845797	0.0139417	0.222477	0.106391	0.532103	0.732154
Car2	0.504462	0.00325999	0.0354199	0.904904	2.80936e-15	1.54642e-13	0.18723	0.314208	0.712694	-0.78524	0.00155689	0.0637228	-0.140939	0.535313	0.734903
Las1l	-0.510182	0.000408371	0.00715498	-1.08872	1.29786e-14	6.62045e-13	-0.0260995	0.899207	0.980015	0.944458	0.00732288	0.159645	-0.176524	0.538768	0.737505
Gk5	0.553232	0.000151521	0.00317375	0.60358	8.57677e-07	1.10388e-05	0.19914	0.215996	0.624711	-0.511069	0.0732016	0.490075	0.289787	0.5433	0.740689
Fam126a	0.446881	0.00116231	0.0164866	0.38021	0.000992503	0.00490114	0.362013	0.0256442	0.19923	-0.125443	0.653663	0.936029	0.100377	0.548957	0.745165
Sh3tc1	-0.483313	0.00203427	0.02512	-0.911531	1.71914e-10	4.95549e-09	-0.308675	0.0798364	0.386017	0.503955	0.027159	0.316167	-0.136038	0.548954	0.745165
Pcgf5	0.413029	0.00305073	0.0338056	-0.497624	0.342851	NA	0.489789	0.00202739	0.0366747	1.06122	0.0176119	0.254063	0.171504	0.548977	0.745165
Mars	-0.48103	0.000292222	0.00542715	-0.460166	6.99255e-05	0.000520064	-0.621175	6.24135e-05	0.00236238	-0.284208	0.311933	0.800333	-0.0720423	0.549853	0.74564
Arhgdib	-0.410132	0.00242191	0.0284441	-0.636845	0.00111095	0.00536903	-0.312317	0.0375096	0.252768	0.248616	0.684048	0.944279	-0.0981267	0.55979	0.751773
Rnf103	0.508831	0.00145211	0.019486	0.575466	6.01831e-08	9.98916e-07	0.264917	0.111081	0.458718	-0.392654	0.125814	0.607487	0.171978	0.567567	0.75743
6430550D23Rik	-0.638666	6.47117e-06	0.000227618	-0.307747	0.277461	0.422458	-0.572472	0.000584998	0.0143206	-0.37303	0.214493	0.720362	-0.38018	0.568156	0.75774
Dbt	-0.441494	0.00373992	0.038937	-0.949794	6.87112e-07	9.09583e-06	-0.268543	0.101581	0.437921	0.554227	0.160879	0.663585	-0.220906	0.569504	0.758349
Accs	-0.645455	3.88739e-05	0.00105345	-1.58067	1.45632e-22	1.61238e-20	-0.118868	0.492929	0.824349	1.36535	0.000303406	0.0221439	-0.0789381	0.571098	0.759359
Maff	0.481864	0.00124792	0.0174346	0.601818	0.00019098	0.00121448	0.458172	0.00612504	0.0788499	-0.248916	0.515427	0.894108	-0.189505	0.571713	0.759468
Stc2	-0.664725	5.24831e-05	0.00135881	-1.10827	1.03548e-14	5.33795e-13	-0.536039	0.00329851	0.0509932	0.398947	0.281724	0.781029	-0.285231	0.574622	0.76135
2610001J05Rik	-0.523471	0.00118802	0.0167489	-0.781838	5.94908e-06	6.08844e-05	0.0587991	0.815694	NA	0.795784	0.196084	0.706068	0.0991147	0.57506	0.761693
Yars	-0.474553	0.000279612	0.00525603	-0.681535	1.91127e-07	2.88259e-06	-0.465471	0.00166113	0.0318498	0.10767	0.738411	0.95736	-0.103039	0.579572	0.76497
Hmgn5	-0.579016	0.000711732	0.011139	-0.463377	0.0263534	0.0705118	-0.873667	7.1031e-05	0.00261053	-0.670378	0.460217	0.874627	0.227311	0.582458	0.767352
Esam	-0.645099	0.000130164	0.00282848	-0.590334	0.0757535	0.161467	-0.605401	0.000756648	0.0175364	-0.10106	0.774664	0.965	-0.333663	0.587528	0.771006
Rps6kb2	0.593868	8.91244e-05	0.00208291	0.11365	0.408551	0.552958	0.742131	2.71516e-05	0.00119056	0.62561	0.0115219	0.201863	-0.127148	0.591089	0.773226
Tcp11l2	0.602985	4.77473e-05	0.00125961	1.09921	2.37092e-08	4.3916e-07	0.52904	0.00140834	0.028185	-0.632936	0.00542	0.135606	0.209042	0.594555	0.775364
Smad5	0.434889	0.00469867	0.04609	0.416478	0.000210253	0.00131905	0.396967	0.0152252	0.145255	-0.0821949	0.672051	0.941005	0.123366	0.599528	0.778745
Sirt1	0.460683	0.00215593	0.0261358	-0.111267	0.810821	NA	0.534447	0.0022579	0.0391821	0.745529	0.128606	0.613111	-0.205982	0.599756	0.778963
Rpl22	-0.415033	0.00516529	0.0492985	-0.322693	0.00283866	0.0116304	-0.563161	0.000913568	0.0203601	-0.386683	0.0860823	0.525172	-0.208245	0.600659	0.779505
Slc30a4	0.736341	8.76362e-05	0.00205503	0.817108	2.11849e-07	3.16087e-06	0.461364	0.0276487	0.209646	-0.383338	0.232746	0.738675	0.107228	0.60576	0.783171
Hnrnpa1	-0.436042	0.00161459	0.0211369	-0.512498	0.0599177	0.134511	-0.347356	0.0249407	0.195834	0.117626	0.826905	0.97614	0.159618	0.608921	0.784746
Cope	-0.44546	0.00451086	0.0446287	-0.608273	2.25681e-05	0.000191701	-0.40283	0.0341635	0.237931	0.0831026	0.801308	0.970843	0.134872	0.616885	0.790668
Rps18	-0.405896	0.00328105	0.0355933	-0.455715	0.000331684	0.00194206	-0.316911	0.0573099	0.324896	0.0678326	0.835715	0.977616	0.140628	0.618594	0.79229
Mutyh	-0.463497	0.002911	0.0326889	-0.767122	2.08279e-06	2.42496e-05	-0.162298	0.375762	0.754394	0.522935	0.0969973	0.547837	0.106716	0.619765	0.792847
Sertad3	0.492746	0.000649184	0.0103461	0.67865	6.15178e-07	8.26714e-06	0.364133	0.039738	0.262079	-0.398195	0.0560288	0.442141	-0.11808	0.620505	0.793158
Rnf14	0.519094	0.0009529	0.0139715	0.526802	1.58943e-06	1.91814e-05	0.264688	0.111504	0.459213	-0.345601	0.111767	0.577628	0.0809426	0.621724	0.794
Adhfe1	-0.495834	0.00472154	0.0462817	-0.604728	0.0497725	0.116487	-0.453405	0.0163007	0.151066	-0.0117257	0.977255	1	-0.317213	0.625841	0.797327
Spp1	-0.585804	0.002154	0.0261358	-0.793039	0.000509889	0.00277223	-0.166919	0.581315	NA	0.588325	0.518964	0.894534	0.165729	0.627628	0.798424
Rasa2	0.462785	0.00109192	0.0156475	0.199804	0.0566523	0.128994	0.54833	0.000959004	0.0211695	0.323659	0.2118	0.717856	0.10908	0.628377	0.798835
Dtwd2	0.459382	0.0049778	0.0480497	0.388815	0.00332815	0.0132597	0.234058	0.161899	0.553398	-0.219596	0.317239	0.803421	-0.16626	0.628452	0.798835
Cep70	0.666913	1.6925e-05	0.000513614	0.789982	5.3036e-11	1.65618e-09	0.322897	0.0833675	0.394717	-0.545328	0.0695471	0.47834	0.200598	0.631556	0.800867
Esco1	0.463254	0.00376627	0.0390068	0.541452	6.20752e-06	6.31973e-05	0.466882	0.00701323	0.08622	-0.110979	0.733408	0.955245	0.164816	0.632077	0.800969
Cdon	0.510412	0.00101831	0.0148213	0.893124	1.70151e-07	2.60248e-06	0.465099	0.00636721	0.0811426	-0.469172	0.188318	0.692776	-0.173584	0.634609	0.802187
Parp1	-0.373027	0.0051984	0.0494256	-0.653009	3.15778e-08	5.65557e-07	-0.332074	0.0362971	0.246987	0.202806	0.43905	0.863405	0.115065	0.634842	0.802322
Thra	-0.648109	2.872e-06	0.000114954	-2.0054	6.74085e-24	9.25016e-22	-0.42347	0.00872844	0.10023	1.50999	5.95669e-07	0.000199776	0.0906969	0.641894	0.807079
Cxcr4	-0.530746	0.000738578	0.0114689	-0.358339	0.012299	0.0384315	-0.692918	0.000156135	0.00488719	-0.492731	0.172672	0.675816	-0.150956	0.6445	0.809001
Ip6k1	0.39403	0.00243125	0.0285058	0.27032	0.0253361	0.0683226	0.389604	0.00757134	0.0911986	0.0338481	0.885576	0.982982	-0.136112	0.645304	0.809488
0610009L18Rik	0.761534	8.816e-06	0.000298054	0.544069	3.54261e-05	0.000286913	0.917623	4.48723e-06	0.000255113	0.401806	0.262626	0.769023	0.331277	0.648041	0.810575
Frmd4b	-0.553636	0.000824318	0.0124398	0.167662	0.784775	NA	-0.500066	0.00211424	0.0375756	-0.908263	0.115011	0.584012	0.197712	0.648616	0.811073
Sesn1	0.506228	0.000764873	0.0117723	-0.513138	0.146325	0.265483	0.591305	0.000877382	0.0196796	1.1711	0.000707087	0.0377274	0.0951849	0.651835	0.813249
Ticam1	-0.479933	0.00166051	0.0215758	-0.777418	6.6181e-05	0.000495629	-0.354076	0.0386066	0.256929	0.315605	0.32138	0.805412	-0.111909	0.656913	0.817187
Ift81	0.413333	0.00495739	0.0479858	0.69227	0.000185691	0.00118947	0.171707	0.30323	0.703597	-0.601092	0.0291997	0.32852	0.196952	0.662393	0.820695
Uck2	-0.439009	0.003092	0.0342356	-0.630773	1.06217e-06	1.34051e-05	-0.336238	0.0504227	0.300494	0.187013	0.446071	0.867135	-0.268178	0.665903	0.822597
Rab26	-0.643084	1.13038e-05	0.000368738	-0.301002	0.594397	NA	-0.48496	0.00411377	0.059938	-0.265276	0.581633	0.914158	0.291185	0.668326	0.824235
BC017643	-0.577298	0.000313961	0.00579227	-0.666529	8.71225e-05	0.000624215	-0.556295	0.00064995	0.0156358	-0.0400193	0.923586	0.991685	-0.0637134	0.668283	0.824235
Egr2	0.437607	0.00397955	0.0406983	1.06536	0.0221423	NA	0.494866	0.00518166	0.0706908	-0.800778	0.0864629	0.525278	-0.292216	0.670693	0.825666
Rcbtb1	0.577716	0.00239428	0.028191	0.990984	3.48361e-06	3.8093e-05	0.274118	0.181067	0.58234	-0.81208	0.0489011	0.418846	0.225356	0.671031	0.82567
Rrs1	-0.462946	0.00352481	0.0373931	-0.464365	2.13914e-05	0.00018297	-0.583302	0.00443778	0.0629469	-0.289139	0.33844	0.814762	0.133471	0.680542	0.831484
Phf15	-0.416715	0.00459986	0.0454086	-0.592217	5.71652e-05	0.000434108	-0.336331	0.0610695	0.335822	0.129763	0.590073	0.916201	-0.149451	0.684644	0.83444
Treml2	-0.459274	0.00117703	0.0166248	-0.259589	0.411726	0.555756	-0.386235	0.016683	0.153284	-0.240041	0.646385	0.934457	-0.0648876	0.688173	0.837063
Pxmp4	0.486922	0.000387447	0.00685737	0.535747	2.93216e-06	3.26755e-05	0.0998871	0.566003	0.858955	-0.524814	0.0652805	0.469582	0.0896211	0.691367	0.839268
Apobec4	-0.852241	2.52518e-06	0.000104063	-1.71113	4.79357e-07	6.55031e-06	-0.67595	0.000501579	0.0125431	0.940812	0.134955	0.624069	-0.2538	0.691998	0.839705
Rfx3	0.590681	0.0020208	0.0250647	0.701157	0.00108757	0.00528227	0.656489	0.00133172	0.0271192	-0.0148614	0.967265	1	0.0994469	0.693878	0.840638
Dntt	-0.766356	3.49204e-07	1.8015e-05	-1.82876	5.4866e-05	NA	-0.659531	9.93166e-05	0.00340052	1.1224	0.036327	0.363425	0.206709	0.69534	0.841239
Trim30a	-0.572873	0.00128042	0.0177562	-0.220867	0.498819	0.635904	-0.571038	0.00107957	0.0230989	-0.5649	0.623746	0.929152	0.0620417	0.696647	0.842074
Nlk	0.4264	0.00521917	0.0495554	0.360832	0.00764192	0.0261155	0.289422	0.116238	0.469218	-0.160213	0.687694	0.945058	0.0730013	0.697201	0.842504
Glrx	-0.741421	2.58405e-06	0.000106175	-1.00902	0.0012041	0.00574897	-0.444559	0.00800872	0.0942971	0.496096	0.58453	0.915346	0.0849084	0.70132	0.844601
Zfp790	-0.559938	0.000394462	0.00696397	-1.22285	1.60758e-09	3.81087e-08	-0.215577	0.20745	0.614824	0.889374	0.0290471	0.327588	-0.0952227	0.708321	0.849826
AI462493	-0.673869	0.000357098	0.00640982	-0.698724	2.62243e-06	2.97789e-05	-0.885587	0.000221564	NA	-0.4553	0.208647	0.715812	-0.0691533	0.713607	0.852959
Nphp3	0.460028	0.0036157	0.0381249	0.584526	0.000139653	0.000938369	0.253307	0.14084	0.517614	-0.408004	0.0783154	0.504909	0.0917935	0.71687	0.854619
Arl4d	0.702233	1.77192e-05	0.000535382	0.748974	2.3269e-09	5.32183e-08	0.0848279	0.762961	NA	-0.686018	0.153453	0.653781	-0.246513	0.717107	0.854822
Grsf1	0.456696	0.00418028	0.0422548	0.407899	0.000995268	0.00491231	0.450957	0.00714989	0.0875139	-0.0218142	0.929467	0.992649	0.0663903	0.718255	0.85579
Sec61b	-0.516602	0.000469336	0.00800169	-0.644674	3.43417e-06	3.77266e-05	-0.428182	0.0339725	0.237265	0.0718655	0.781002	0.96558	0.131724	0.719556	0.856336
Fli1	-0.4566	0.000218126	0.00426001	-0.166661	0.11083	0.215361	-0.44552	0.0010576	0.0226984	-0.396723	0.143949	0.643297	-0.125189	0.719929	0.856507
Aff4	0.486869	0.00192035	0.0241631	0.524852	5.83125e-05	0.000442131	0.377103	0.0328936	0.232787	-0.223425	0.507689	0.891383	0.13055	0.72449	0.859903
Tmem140	-0.579261	8.54927e-05	0.00201494	-0.325034	0.275713	0.420446	-0.538853	0.000935932	0.0207589	-0.533635	0.599157	0.920268	0.16644	0.725518	0.860187
Metap2	-0.465876	0.000733927	0.0114478	0.243191	0.686687	NA	-0.390912	0.0155592	0.146832	-0.660382	0.20976	0.715888	-0.0888936	0.733938	0.865267
Il10rb	0.535132	0.00217736	0.0263497	0.764804	5.06044e-07	6.87642e-06	0.123245	0.480414	0.816709	-0.722106	0.0192959	0.265173	-0.110764	0.738369	0.867685
Sub1	0.451749	0.00513042	0.0490808	0.121778	0.858656	NA	0.519702	0.00567212	0.0745348	0.242965	0.752728	0.960383	0.130458	0.74416	0.870427
Setmar	0.595377	0.000678098	0.010721	0.749595	0.000420394	0.00235939	0.509147	0.015248	0.14527	-0.248476	0.513626	0.893677	0.260448	0.750914	0.875175
Dusp22	0.453747	0.00157984	0.0208584	0.823951	6.09194e-06	6.22157e-05	0.179108	0.313768	0.712694	-0.754803	0.0382744	0.37282	-0.185925	0.750849	0.875175
Dnttip2	-0.515909	0.00122817	0.0172104	-0.798535	3.4359e-11	1.10848e-09	-0.316098	0.0983828	0.431832	0.380888	0.153322	0.653661	-0.107687	0.757721	0.879094
4632428N05Rik	-0.585298	0.000339399	0.00616362	-0.58003	0.0677396	0.148179	-0.562709	0.00160298	0.0311842	-0.127618	0.713181	0.951212	0.159475	0.759141	0.8796
Vezf1	0.472084	0.0014216	0.0191874	0.461784	0.000229538	0.00142264	0.434586	0.00684664	0.0849817	-0.11338	0.70254	0.948527	0.0756113	0.761091	0.881002
Uhrf2	0.446105	0.0046859	0.0459971	0.404866	0.00026789	0.00162176	0.375091	0.0455595	0.283527	-0.0756965	0.78808	0.967853	-0.0517102	0.761825	0.881371
Yipf4	0.756716	1.34964e-05	0.000427253	0.783114	5.75726e-12	2.07752e-10	0.725297	0.000336271	0.0089048	-0.0158883	0.959395	0.997903	0.0802068	0.763299	0.882117
Adipor2	0.436201	0.00197072	0.0245969	-0.374107	0.583072	NA	0.508615	0.00236507	0.0405204	1.21061	0.074782	0.493509	-0.0480934	0.765773	0.883776
Rad54b	0.498342	0.00108127	0.0155268	0.518008	9.68802e-06	9.2955e-05	0.246545	0.121493	0.47967	-0.369636	0.173511	0.676746	0.0606056	0.767151	0.884726
Tmem108	-0.743466	1.13006e-09	1.06356e-07	-0.149095	0.248379	0.391326	-0.767595	2.41803e-08	2.47653e-06	-0.744122	0.00440442	0.120234	-0.0566063	0.767228	0.884735
Myo5a	0.449962	0.00330591	0.0358072	0.469081	0.000241505	0.00147986	0.497011	0.00470288	0.0657035	-0.00458375	0.987055	1	0.076556	0.769628	0.886221
Ntan1	0.395697	0.00424799	0.0428459	0.565747	6.20771e-07	8.31936e-06	-0.00842928	0.957608	0.991883	-0.713453	0.0161943	0.240649	0.0398216	0.771375	0.887173
Gm10691	-0.445336	0.00204575	0.0252171	-0.24803	0.0591601	0.133157	-0.733192	9.71148e-05	0.00335484	-0.615649	0.118984	0.592857	-0.156303	0.7746	0.889219
D5Ertd579e	0.430247	0.00256982	0.0297054	0.831588	1.54621e-10	4.51041e-09	0.313828	0.0372498	0.25126	-0.611056	0.0096372	0.186206	0.0355798	0.777441	0.890557
A130050O07Rik	-0.758872	0.000153139	0.003198	-0.890764	0.00468553	0.0175514	-0.694802	0.00139461	0.0279907	0.0469646	0.94015	0.994509	-0.137463	0.779129	0.891518
Zfp457	-0.498596	0.000577653	0.00944381	-0.91151	2.66543e-07	3.91104e-06	-0.096221	0.616267	0.881132	0.749653	0.174815	0.677276	-0.17534	0.794446	0.898663
Paqr3	0.532353	0.00200511	0.0249449	0.668167	9.32648e-05	0.00066182	0.270224	0.117234	0.471681	-0.481157	0.0662233	0.470884	0.0855669	0.79548	0.899275
Pif1	-0.474884	0.00103779	0.0150421	-0.662336	0.165018	0.289792	-0.38889	0.0286935	0.214072	0.40904	0.458184	0.873542	0.0633177	0.79646	0.899511
Ndfip2	0.427507	0.00443701	0.0441767	0.278061	0.0199213	0.056406	0.391057	0.0180744	0.160385	0.0362242	0.876437	0.982682	-0.0634502	0.8055	0.905246
Tef	0.443737	0.00314308	0.0345813	-0.825538	4.23481e-06	4.51914e-05	0.634467	0.000418459	0.0107939	1.47221	1.25956e-06	0.000361063	0.0389264	0.807999	0.906602
Mfsd3	-0.481978	0.00485634	0.0472704	-0.565624	0.000240821	0.0014766	-0.386949	0.0436489	0.27725	0.0565811	0.843319	0.978554	-0.0611505	0.809534	0.907016
Nmral1	-0.503753	0.00278084	0.0314402	-0.805915	4.30486e-05	0.000339339	-0.370897	0.0343026	0.238363	0.294038	0.462426	0.875451	-0.044978	0.813461	0.909292
Vrk1	-0.591685	5.46816e-06	0.000197321	-1.39328	2.33201e-23	2.91292e-21	-0.351299	0.015801	0.148511	0.942045	0.000523071	0.0304462	0.0577273	0.813744	0.909296
Fcgr1	-0.54834	0.00107159	0.0154176	-1.00761	0.0484391	NA	-0.451296	0.0117553	0.124045	0.813687	0.50872	0.892271	-0.0538609	0.816802	0.911271
Cox7b	-0.522376	0.00168404	0.0218204	-0.787904	2.69199e-05	0.000223789	-0.082829	0.736888	NA	0.599039	0.281988	0.781151	-0.0558228	0.818621	0.91253
Ap1s1	-0.623502	0.00016033	0.00331834	-0.912377	2.94941e-12	1.13582e-10	-0.550844	0.00665605	0.0835997	0.225112	0.404177	0.847365	0.0235193	0.820834	0.913772
Sgpp1	0.476237	0.00340717	0.0366301	0.583303	4.06165e-06	4.34864e-05	0.15536	0.402315	0.773738	-0.48669	0.0437658	0.399496	0.0706459	0.824953	0.915574
Gmfg	-0.602353	6.30717e-05	0.0015716	-1.08453	0.0109031	NA	-0.519943	0.00180651	0.033832	0.575149	0.210964	0.716582	0.0679408	0.82528	0.915765
Ppfia4	-0.535361	0.000287588	0.00536971	-0.972142	0.0136033	0.0415477	-0.4447	0.00793208	0.0937911	0.531694	0.113222	0.581126	-0.0747938	0.83552	0.922023
Crb3	0.737116	8.00239e-06	0.000274599	-0.0142072	0.96961	0.982314	0.86047	3.67099e-06	0.000213946	0.835925	0.0558983	0.441925	0.182657	0.838396	0.923814
Rpl4	-0.64302	4.06669e-06	0.000153509	-0.711291	8.96063e-06	8.66169e-05	-0.615256	0.000622486	0.0150531	-0.0172012	0.971169	1	0.0222782	0.841782	0.92537
Arhgef17	-0.603588	8.06292e-05	0.0019297	-0.0964914	0.831899	NA	-0.533832	0.00165804	0.0318498	-0.576695	0.153698	0.654215	-0.0743493	0.850485	0.929248
1700008O03Rik	-0.514724	0.000669092	0.0106148	-0.0446226	0.948461	NA	-0.431579	0.0132273	0.13364	-0.624012	0.365561	0.828852	0.151044	0.850526	0.929248
Slc35f2	0.520107	0.000432986	0.00750133	0.649409	2.54128e-08	4.68048e-07	0.275053	0.0808801	0.38794	-0.451995	0.0183286	0.258849	-0.0389664	0.852436	0.930507
Zc3h12d	-0.710375	3.89131e-06	0.00014769	0.00153955	0.997724	NA	-0.65217	6.09174e-05	0.00231204	-0.77109	0.103214	0.562394	-0.0587213	0.862143	0.935919
Adam33	-0.648008	0.000250533	0.00478693	0.457622	0.397199	NA	-0.602998	0.00166378	0.0318498	-1.30006	0.00802396	0.168947	0.183399	0.868022	0.93847
Fgfr4	-0.555259	0.000769541	0.0117956	0.503152	0.365978	NA	-0.50335	0.00725986	0.0884712	-1.38356	0.00828373	0.170672	-0.0994035	0.88049	0.945701
Mrpl16	-0.580152	0.000915496	0.0135659	-0.832211	4.36919e-07	6.03816e-06	-0.115831	0.649639	NA	0.614274	0.077766	0.504101	-0.0277802	0.88049	0.945701
Prkce	-0.36412	0.00367551	0.0384933	-0.192593	0.216006	0.353427	-0.299865	0.0382116	0.25547	-0.213518	0.563479	0.907654	0.020453	0.886457	0.949553
Mgat5	-0.672146	3.16686e-06	0.000123216	-0.334468	0.0122561	0.0383221	-0.637856	1.8016e-05	0.00084937	-0.445646	0.167343	0.670279	0.0906272	0.888851	0.950999
Hsf2	0.570989	0.000675207	0.0106875	0.490963	0.000211433	0.00132475	0.652333	0.00117227	0.0246655	0.138849	0.65445	0.936029	0.0210005	0.895026	0.954174
Eif3k	-0.490069	0.00430545	0.0431443	-0.814337	1.95204e-06	2.29879e-05	-0.282028	0.129281	0.494714	0.433275	0.160331	0.662267	0.0239361	0.899652	0.955447
Ccdc66	0.500501	0.00242648	0.0284738	0.435276	0.00388325	0.0150018	0.372009	0.0592492	0.33104	-0.171187	0.637185	0.93338	-0.0430971	0.899828	0.955455
Rpl15	-0.434913	0.00425251	0.0428532	-0.517405	7.7403e-06	7.69528e-05	-0.357185	0.0413564	0.269058	0.0641406	0.813423	0.973185	-0.0381273	0.90056	0.955759
Pipox	-0.764845	6.03426e-07	2.93885e-05	-1.27867	0.00260755	NA	-0.678571	6.75775e-05	0.00250342	0.661375	0.228746	0.735139	-0.0341708	0.902394	0.956428
Heg1	-0.377354	0.00441455	0.0440159	0.159164	0.246745	0.389254	-0.464266	0.00186604	0.0346099	-0.802932	0.0120387	0.206518	0.0299647	0.903827	0.956783
Med13l	-0.49375	0.00015056	0.00316241	-0.529994	0.00374432	0.0145691	-0.440783	0.00193999	0.0356022	-0.0281889	0.923549	0.991685	0.0592195	0.90619	0.958379
Qrfp	-0.774603	5.93503e-07	2.90067e-05	-0.313963	0.189801	0.32184	-0.7601	2.19536e-05	0.000996063	-0.577633	0.0314264	0.336954	-0.0465889	0.907624	0.958469
Fam122b	-0.61905	6.04679e-05	0.00151213	-0.680983	2.65383e-06	3.01004e-05	-0.795782	1.0763e-05	0.000555253	-0.255863	0.421865	0.856441	-0.0447435	0.907023	0.958469
Rpl6	-0.507559	0.00080153	0.0121485	-0.599721	4.07008e-07	5.69752e-06	-0.425038	0.00974233	0.109084	0.0976679	0.725169	0.95348	0.0207955	0.907094	0.958469
Ddx21	-0.385324	0.0030309	0.03372	-0.469392	8.84351e-05	0.00063134	-0.451412	0.00454985	0.064015	-0.130903	0.672901	0.941541	-0.0365159	0.908778	0.958496
Dalrd3	-0.619847	0.000160957	0.00332145	-0.817243	4.62883e-13	1.97801e-11	-0.468927	0.0113743	0.121034	0.200356	0.515637	0.894108	-0.0151303	0.909765	0.958667
Rpl23	-0.533926	0.000188354	0.0038023	-0.564235	7.33993e-09	1.49922e-07	-0.660326	7.08203e-05	0.00260967	-0.223976	0.218398	0.726082	0.0379994	0.909735	0.958667
Tap2	-0.474808	0.00140325	0.0190692	-0.990664	0.00227003	0.00968929	-0.383923	0.0267537	0.205205	0.468852	0.205035	0.712689	-0.016047	0.911371	0.959842
Rps9	-0.410986	0.00500015	0.048132	-0.296654	0.300676	0.448208	-0.480643	0.00783756	0.0929101	-0.230325	0.669115	0.940019	0.02949	0.911762	0.9599
0610030E20Rik	0.615461	0.000482379	0.0081542	0.525284	1.15963e-05	0.000109056	0.860579	3.39003e-05	0.00142481	0.368974	0.278297	0.778134	-0.0355501	0.916174	0.962096
Shmt2	-0.538353	7.5711e-05	0.00182453	-0.631154	0.000584528	0.00312915	-0.479374	0.00175632	0.0332389	0.122493	0.821504	0.974787	0.0254803	0.921395	0.965185
Ptpn14	-0.444088	0.00408197	0.0414636	0.302395	0.56637	NA	-0.371057	0.0320972	0.229273	-0.951932	0.0401248	0.379544	0.0388191	0.924394	0.965868
Tmem62	0.71755	6.27562e-06	0.000222425	0.992958	6.19199e-18	4.43592e-16	0.673545	0.000270514	0.00747618	-0.338018	0.170886	0.673882	0.0218518	0.927025	0.966876
Pdpr	0.42609	0.00494848	0.0479858	0.442728	0.0010037	0.00495142	0.217317	0.169625	0.568119	-0.354373	0.299097	0.794042	0.0534713	0.927733	0.967377
Dusp6	-0.810733	2.51147e-07	1.36649e-05	-0.953283	1.32327e-18	1.05677e-16	-0.702518	0.000127419	0.00412554	0.0534339	0.911937	0.988996	-0.0280988	0.932682	0.969215
Nbeal1	0.665032	0.000134668	0.0028814	0.769914	2.18295e-10	6.14697e-09	0.476057	0.0216687	0.180193	-0.293534	0.368663	0.828852	0.0376194	0.932865	0.969215
Rpl23a	-0.521116	0.000506694	0.00847268	-0.641257	1.72977e-05	0.00015321	-0.439566	0.0145135	0.140502	0.0899586	0.820508	0.974667	-0.0239192	0.945487	0.974267
Fzd7	-0.544646	0.0014908	0.0198521	-0.923501	1.08774e-09	2.6561e-08	-0.107826	0.587729	0.868038	0.758753	0.0537318	0.436234	-0.0308623	0.945898	0.974455
Wdsub1	0.432341	0.00387611	0.0398747	0.694403	7.83354e-07	1.02446e-05	0.04692	0.780545	0.943344	-0.747305	0.000794829	0.0402733	-0.0155254	0.949138	0.975902
Iqcb1	0.809407	1.19579e-05	0.000387469	0.837328	4.18481e-10	1.11401e-08	0.739572	0.00241582	0.0411368	-0.00580041	0.988932	1	0.0244634	0.949948	0.976198
Blvra	0.436292	0.00526401	0.0498453	0.417119	0.00043369	0.00241454	0.115182	0.51634	0.834511	-0.39143	0.12119	0.598663	0.0150107	0.950935	0.976437
Ccdc28a	0.480696	0.00290736	0.0326849	0.488812	0.000708851	0.00367955	0.261104	0.171273	0.57132	-0.304138	0.424678	0.858212	0.0143811	0.958576	0.980727
Per1	-0.46248	0.000697302	0.0109624	-0.447974	0.10566	0.20755	-0.389324	0.0101716	0.112089	0.0401786	0.927739	0.992649	0.00595047	0.966612	0.984509
Dnajb13	-0.749829	4.85154e-06	0.00017925	-1.47045	0.0132319	NA	-0.669673	0.000279057	0.0076818	0.862228	0.115423	0.584628	-0.0239887	0.977214	0.988366
Zfp646	-0.412367	0.00507392	0.0487076	-0.780514	3.9292e-10	1.04883e-08	-0.122932	0.481605	0.817579	0.568524	0.046559	0.411695	-0.0041567	0.977826	0.988672
Jun	-0.832357	2.97598e-06	0.000117097	-1.05415	1.73439e-14	8.66571e-13	-0.623408	0.00238672	0.0408411	0.230566	0.56227	0.907613	-0.0169119	0.983984	0.992534
Samd8	0.481814	0.00317477	0.034733	0.493782	4.44178e-05	0.000349284	0.169995	0.309579	0.708863	-0.430933	0.182594	0.685078	-0.00396143	0.985397	0.993023
2610318N02Rik	-0.63293	6.19217e-06	0.000220173	-0.737328	6.77869e-09	1.40521e-07	-0.595826	0.000146398	0.00463442	0.0126686	0.958706	0.997513	0.00254286	0.986432	0.99383
Ntf5	0.625494	0.00087697	0.0130366	0.960159	2.36053e-06	2.70891e-05	0.233942	0.306648	NA	-0.815586	0.0372056	0.367259	0.0104808	0.987221	0.994119
Aktip	0.555147	0.000125904	0.00276175	0.368621	0.258204	0.402147	0.644822	0.000121726	0.00399392	0.254662	0.533987	0.899704	0.00255134	0.988367	0.994759
Gm867	-1.82932	5.15807e-30	5.13191e-27	-1.86711	7.99168e-13	3.28536e-11	-1.86376	5.17314e-28	1.02938e-24	-0.238088	0.696361	0.94717	0.00391553	0.994049	0.997645
Wdr5b	-0.523865	0.00183363	0.0233674	-0.783888	2.0745e-05	0.00017855	-0.239744	0.210156	0.617305	0.404001	0.435652	0.862052	0.00109993	0.996509	0.998426
Fdx1	0.743662	1.64268e-05	0.000500676	0.702178	3.84444e-05	0.000307777	0.660085	0.000903335	0.0201644	-0.0606922	0.820779	0.974667	-0.000667064	0.999095	0.999572
Gm10642	0.581193	0.00015559	0.00323948	0.543223	0.00878051	0.0292574	0.618747	0.000899417	0.0201091	0.0718281	0.868609	0.98185	-0.000243605	0.999673	0.999673
Srp68	-0.372258	0.00528796	0.050004	-0.0553924	0.563558	0.692767	-0.719424	3.47667e-06	0.00020607	-0.802085	0.000342317	0.0243529	-0.51816	0.0050427	0.0357685
Wdr46	-0.490691	0.00529393	0.050016	-0.829061	5.81407e-05	0.000441172	-0.349646	0.0665912	0.35268	0.373909	0.245309	0.751949	-0.0381822	0.801738	0.902763
Slc38a6	0.392241	0.0052964	0.050016	0.413643	0.00201908	0.00877959	0.215685	0.17954	0.58145	-0.273563	0.165429	0.669489	0.0508316	0.812999	0.909254
Fnta	0.438231	0.00532519	0.0501519	0.470772	0.000196177	0.00123872	0.203504	0.23621	0.646346	-0.372543	0.177535	0.680623	0.346936	0.0247763	0.109562
Cyth2	0.441353	0.00533371	0.0501982	0.374783	0.00144493	0.00666888	0.539059	0.00358693	0.0541891	0.149316	0.630179	0.930336	0.221896	0.257655	0.485915
Ccr2	-0.811914	0.00533969	0.050206	-0.547833	0.415573	NA	-0.911241	0.00413986	0.0600108	-0.788942	0.378544	0.834694	-3.64968	1.79e-09	3.32e-07
Ccdc50	0.437939	0.00534176	0.050206	0.393632	0.00311135	0.0125541	0.260488	0.144786	0.52505	-0.186617	0.494867	0.886875	0.08761	0.620824	0.793406
Iqcg	-0.452139	0.0053799	0.0504964	-0.419161	0.45709	NA	-0.391578	0.0162261	0.150977	0.00884745	0.986763	1	-0.509609	0.0630106	0.202147
Rufy2	0.417665	0.00537803	0.0504964	0.871871	4.04956e-07	5.68127e-06	0.173252	0.255798	0.664278	-0.769681	0.0076769	0.16386	0.0933893	0.780553	0.892225
Mapk8	0.482527	0.00539271	0.0505826	0.65386	6.50074e-07	8.68816e-06	0.290314	0.12702	0.489827	-0.446546	0.15179	0.652861	0.181332	0.427502	0.648572
Atxn7l3	0.426358	0.00539958	0.0506129	0.570139	1.11736e-06	1.40109e-05	0.300104	0.0902916	0.413844	-0.33348	0.175711	0.678883	0.342633	0.101488	0.276395
Atxn7l3	0.426358	0.00539958	0.0506129	0.570139	1.11736e-06	1.40109e-05	0.300104	0.0902916	0.413844	-0.33348	0.175711	0.678883	0.342633	0.101488	0.276395
Fam109a	0.492165	0.00540745	0.0506525	0.656739	4.34224e-06	4.62366e-05	0.202903	0.334648	0.728505	-0.591564	0.27955	0.778364	0.149585	0.434495	0.654741
Cdc27	0.42064	0.00544127	0.0509009	0.204385	0.129282	0.242098	0.438883	0.0160722	0.150148	0.197841	0.520571	0.895126	0.467636	0.0869758	0.250618
Pdpk1	0.406928	0.00544071	0.0509009	-0.372058	0.467612	NA	0.479121	0.0052693	0.0711892	1.04114	0.0183579	0.258849	0.470395	0.149393	0.349561
Bcs1l	-0.461385	0.00545299	0.0509763	-0.500681	0.00281008	0.0115473	-0.49716	0.0162643	NA	-0.164566	0.603859	0.922055	0.0330259	0.865472	0.936948
Aim1	0.378593	0.00548172	0.0512105	0.2214	0.666874	NA	0.452035	0.00452009	0.0636607	0.0989714	0.811898	0.972591	0.880054	0.015175	0.0778395
Slc35a1	0.449786	0.00550053	0.0513174	0.422509	0.0010231	0.00502676	0.269667	0.124059	0.484779	-0.224331	0.416946	0.854284	0.536749	0.110195	0.291471
Gde1	0.441703	0.00550878	0.05136	0.508408	5.27397e-05	0.000405559	0.214862	0.1994	0.607355	-0.380727	0.145218	0.644212	0.242074	0.0785488	0.234614
Tespa1	0.607166	0.00553232	0.0515105	0.880926	0.085248	0.176567	0.646254	0.00419759	0.0606516	-0.0945132	0.919978	0.990663	1.55963	0.00392466	0.030209
Atad3a	-0.390878	0.00554642	0.0515236	-0.376231	0.0022723	0.00969311	-0.69797	1.81651e-05	0.000851923	-0.505955	0.115397	0.584628	-0.784164	0.000143474	0.00264216
Asah1	0.395558	0.00554311	0.0515236	0.327159	0.00367762	0.0143727	0.272293	0.113829	0.463196	-0.15629	0.599729	0.920268	0.26821	0.0867086	0.250226
Kdm1b	0.428563	0.00554731	0.0515236	0.414603	0.000399471	0.00227207	0.256165	0.120602	0.477449	-0.249678	0.383449	0.835827	0.293426	0.26935	0.49986
Iscu	-0.453446	0.00557399	0.0517256	0.0847135	0.519072	0.654556	-0.960293	2.1773e-06	0.000135998	-1.25651	2.12548e-05	0.00318506	-0.716353	0.00341929	0.0276709
4933426M11Rik	0.432357	0.00558062	0.0517527	0.563482	4.79592e-06	5.06247e-05	0.254952	0.132604	0.501864	-0.429686	0.17921	0.682056	0.595497	0.0435467	0.159011
Comt	0.394901	0.00558683	0.0517758	0.394266	0.00506366	0.0186805	0.453946	0.00677134	0.0845144	-0.00632918	0.980535	1	-0.139488	0.734229	0.86545
Atp11b	0.46458	0.00559709	0.051782	0.419365	0.000138649	0.000933554	0.431968	0.027088	0.206292	-0.0625629	0.859394	0.981273	0.551751	0.00265782	0.0227787
Dennd5a	0.401237	0.00559865	0.051782	0.596322	9.48538e-07	1.21377e-05	0.182475	0.227585	0.637705	-0.515385	0.023579	0.292261	0.233137	0.0439358	0.160157
Mki67	0.440861	0.00559395	0.051782	0.451408	0.000390555	0.00223047	0.273212	0.135854	0.507321	-0.315585	0.471922	0.878718	0.761581	0.0754994	0.228506
Ppp3cc	0.439274	0.00561744	0.0518524	0.248231	0.059707	0.134131	0.371318	0.0302234	0.220979	0.0574304	0.835853	0.977616	0.802285	0.00313151	0.0257502
Ezh2	0.432482	0.00561264	0.0518524	0.183001	0.0663258	0.145609	0.543586	0.00219396	0.0384398	0.328608	0.169214	0.67199	0.374165	0.00392976	0.03023
Dcaf6	0.429513	0.00561459	0.0518524	0.334293	0.00227996	0.00971725	0.445177	0.0167128	0.153355	0.0704796	0.784626	0.96667	0.516883	0.0233944	0.104831
Capn1	0.442775	0.0056618	0.0522273	0.927058	1.36505e-06	1.68137e-05	0.426267	0.0192807	0.166815	-0.551255	0.0435773	0.39885	0.689811	0.00208917	0.0189092
Nxt2	0.483426	0.00566939	0.0522627	-0.536878	0.434434	NA	0.566232	0.00440067	0.0626118	1.48488	0.0295018	0.32867	0.0349996	0.888375	0.950649
Bptf	0.35473	0.00571658	0.0526509	0.221557	0.0968067	0.194311	0.403213	0.00536951	0.0722627	0.0811139	0.761841	0.962826	0.482032	5.08e-05	0.00115592
Rnf41	-0.415587	0.00572503	0.052671	-0.843538	1.10106e-12	4.45131e-11	-0.219118	0.174044	0.575271	0.531017	0.0127544	0.212613	-0.402965	0.0242136	0.107745
Nsun4	-0.427663	0.00574172	0.0527898	-0.776053	1.31584e-05	0.000120265	-0.0153634	0.928467	0.985826	0.698702	0.0993033	0.553756	-0.0763948	0.670714	0.825666
Nsun4	-0.427663	0.00574172	0.0527898	-0.776053	1.31584e-05	0.000120265	-0.0153634	0.928467	0.985826	0.698702	0.0993033	0.553756	-0.295419	0.686029	0.835555
Slc30a1	0.476073	0.00576706	0.0529877	0.510113	0.000163361	0.00106892	0.376776	0.0801304	0.386243	-0.180428	0.64493	0.934457	-0.496475	0.121803	0.310766
Add1	0.392818	0.00582991	0.0535298	0.320403	0.00569367	0.0205381	0.246951	0.0955987	0.425522	-0.166457	0.488105	0.884985	0.354908	0.0213969	0.0984736
Atic	-0.401004	0.0058511	0.0535832	-0.431861	0.000259326	0.00157913	-0.60183	0.000199062	0.00596287	-0.353015	0.269437	0.773358	-0.337936	0.0416277	0.155065
Snrpa	-0.4306	0.005846	0.0535832	-0.503063	1.20305e-05	0.000112488	-0.527418	0.00317255	0.0495965	-0.159207	0.557242	0.906108	-0.125983	0.374864	0.603129
Eno3	-0.465481	0.00585004	0.0535832	-0.576146	0.134015	0.248754	-0.384111	0.0439419	0.278031	0.141581	0.767071	0.964614	-0.208629	0.470597	0.684807
Zfp3	0.434745	0.00585712	0.053603	0.710431	1.26933e-07	1.98288e-06	0.311905	0.0801656	0.386243	-0.472079	0.059373	0.45207	0.415352	0.173937	0.384844
Fmo5	0.47613	0.0059025	0.0539829	0.764043	0.00679287	0.0237726	0.221008	0.31846	0.717244	-0.60397	0.164382	0.668828	-0.169585	0.774582	0.889219
Myl4	0.383947	0.00591362	0.0540491	-0.0558449	0.66366	0.771972	0.552096	0.000338584	0.00894903	0.562304	0.0502289	0.423667	0.522715	0.0255751	0.111777
Amfr	0.408755	0.00592407	0.0541091	0.267682	0.0500667	0.116922	0.437674	0.00664977	0.0835997	0.103682	0.642482	0.934048	0.53809	0.000127386	0.00241508
Otud7b	0.399251	0.00594273	0.054244	0.12449	0.335963	0.484498	0.435181	0.00802638	0.0944252	0.252272	0.30632	0.798101	0.307678	0.04805	0.169631
Hltf	0.44199	0.00596265	0.0543901	0.401082	0.00335464	0.0133351	0.378126	0.069173	0.358983	-0.0495547	0.87757	0.982682	0.079689	0.618361	0.792146
Nfam1	-0.500478	0.00597192	0.054439	-1.35295	0.0250476	NA	-0.411311	0.0345745	0.239239	1.13673	0.0617267	0.46035	-2.97678	0.000571816	0.00741617
Pogz	0.388549	0.00597652	0.0544453	0.293815	0.0376868	0.0933832	0.427246	0.00799465	0.094211	0.033286	0.900174	0.985761	0.278891	0.0116934	0.0651421
Amigo1	0.468559	0.00599379	0.054567	0.596996	0.00667275	0.0234449	0.305825	0.103254	0.44185	-0.386353	0.234274	0.73997	0.798365	4.67e-05	0.00109213
Fahd1	-0.445171	0.00600996	0.0546784	-0.382416	0.00162163	0.00734519	-1.0371	1.04193e-06	7.01114e-05	-0.883486	0.0016473	0.0657333	-0.691103	0.0108615	0.062215
Elf1	0.425468	0.00602472	0.054777	0.230459	0.0325794	0.0833782	0.447609	0.00638259	0.0812642	0.0925681	0.822509	0.975413	1.04416	0.00466459	0.033997
Zfp623	-0.455805	0.00602865	0.054777	-0.856773	8.84649e-09	1.7845e-07	0.187628	0.366595	NA	1.02114	0.00431498	0.118713	-2.17037	0.000576052	0.00744841
Pla2g4b	0.437406	0.00606293	0.0550209	0.476096	4.6771e-05	0.000366016	0.208655	0.331538	0.726671	-0.344835	0.276775	0.77689	1.35411	0.00167729	0.0160577
Lancl1	0.429884	0.0060634	0.0550209	0.45502	0.00150432	0.00690047	0.189813	0.251666	0.662157	-0.338324	0.165083	0.66928	0.0428243	0.87395	0.942643
C330018D20Rik	0.464315	0.00608044	0.0551396	0.371622	0.000475925	0.00261531	0.461864	0.0475415	0.290568	0.0874166	0.824219	0.975915	0.179	0.487088	0.698222
Arpc5l	0.395662	0.00614518	0.0556829	0.193991	0.0682692	0.149169	0.449201	0.00311105	0.0489754	0.188389	0.349489	0.820797	0.418483	0.0228224	0.102991
Acot8	-0.432394	0.00614834	0.0556829	-0.627322	1.46131e-08	2.83616e-07	-0.214344	0.200518	0.608131	0.313157	0.196155	0.706068	0.0563029	0.81971	0.912999
Hsf4	0.504082	0.00616717	0.0558171	0.679151	0.0101856	0.0328999	0.420841	0.0466507	0.287797	-0.347282	0.443189	0.86434	1.8276	0.106237	0.284832
Map4k1	0.400228	0.00620235	0.0560263	-0.479908	0.149715	0.269549	0.552588	0.00167947	0.0320456	1.09622	0.0257949	0.308706	0.98067	5.2e-07	3.32e-05
Dcbld1	0.420508	0.00619758	0.0560263	0.312909	0.049892	0.116682	0.275277	0.0967713	0.427546	-0.0653901	0.819515	0.974629	0.437448	0.0355471	0.1392
Tmem79	-0.516665	0.00619963	0.0560263	-0.749029	0.0186724	0.0536652	-0.374282	0.0667652	0.352903	0.275703	0.491172	0.886007	-0.65418	0.145395	0.344943
0610010F05Rik	0.41835	0.00621329	0.0560524	0.293775	0.00751136	0.0257869	0.333985	0.0788096	0.383784	-0.0208757	0.949345	0.995568	0.632522	0.0316884	0.129039
Tg	-0.507955	0.00625027	0.0563495	-0.178302	0.793898	NA	-0.4571	0.0132375	0.13364	-0.468357	0.582995	0.914727	-0.171366	0.809525	0.907016
Pias2	0.444189	0.00626826	0.0564751	0.442328	0.000406715	0.00230251	0.423303	0.022062	0.181943	-0.0865178	0.77149	0.965	0.0427312	0.811815	0.908445
Mfap2	-0.488252	0.00627936	0.0565386	-0.667302	0.0834148	0.173805	-0.398692	0.0412023	0.26878	0.110565	0.82558	0.976006	0.0516337	0.958309	0.980727
Lcp2	-0.55136	0.00628884	0.0565873	-0.147215	0.831307	NA	-0.498991	0.0147728	0.141716	-0.49668	0.562313	0.907613	-1.21295	0.00838284	0.0519834
Pafah2	-0.424006	0.00633039	0.0569244	-0.53469	0.0748169	0.159855	-0.332285	0.056771	0.323289	0.21183	0.808226	0.972591	-0.807449	0.000667263	0.00837327
Cars2	-0.376805	0.00637509	0.0572894	-0.572392	3.57e-07	5.06295e-06	-0.365636	0.0371153	0.250596	0.0678024	0.802182	0.970843	-0.926133	1.43e-06	7.17e-05
Snn	-0.374593	0.00638735	0.0573425	-0.194404	0.114046	0.219769	-0.709449	3.784e-05	0.00157335	-0.681161	0.0146763	0.226183	-1.3241	0.000320296	0.0048168
Wdr7	0.379553	0.00638923	0.0573425	0.414209	0.00551808	0.0200757	0.357788	0.0282112	0.211721	-0.105754	0.650823	0.935182	0.745051	0.109748	0.290784
Atl3	-0.406057	0.00641002	0.0574254	-0.4459	2.20918e-05	0.000188147	-0.345698	0.0418098	0.270869	0.0106224	0.962878	0.998577	-0.276027	0.435172	0.655454
9030624J02Rik	-0.393225	0.00641094	0.0574254	-0.665032	0.00275255	0.011354	-0.308161	0.0538099	0.313475	0.301108	0.429759	0.860321	-0.108977	0.545756	0.742848
Brap	0.414268	0.00645214	0.0576842	0.44987	0.000278024	0.00167106	0.170306	0.295811	0.696449	-0.394248	0.197317	0.706412	0.0659314	0.562871	0.753604
Lman1	-0.41212	0.0064705	0.0578112	-0.592765	0.387735	NA	-0.327455	0.0674474	0.354428	0.84674	0.41068	0.84958	-0.342684	0.266598	0.496182
Atp2b1	0.423288	0.00650185	0.0580054	0.224438	0.125968	0.237023	0.43105	0.0130382	0.132547	0.0550987	0.8845	0.982982	0.542818	0.00356746	0.0284194
Dhcr24	0.362825	0.00650473	0.0580054	0.521764	3.21366e-05	0.000263046	0.0677976	0.690827	0.912568	-0.638545	0.068718	0.476253	0.370535	0.149034	0.349287
Grk4	0.41648	0.00652483	0.0581474	0.239889	0.0566117	0.128941	0.372309	0.0341093	0.237792	0.113228	0.654693	0.936029	0.215743	0.651131	0.812767
Rcor2	0.415254	0.0065549	0.0582663	0.145326	0.311325	0.459234	0.522497	0.00431741	0.0617425	0.330721	0.36098	0.826517	0.642463	0.000595203	0.00764183
Tnks2	0.452753	0.00655462	0.0582663	0.3358	0.0147981	0.0444857	0.391227	0.0326896	0.232076	0.00216997	0.994502	1	0.541724	0.118545	0.305138
Padi2	-0.451232	0.0065477	0.0582663	0.000665135	0.998743	NA	-0.379129	0.0461773	0.286378	-0.535703	0.17099	0.674101	-0.449953	0.132934	0.326689
Syp	0.400632	0.00656069	0.0582806	0.532032	0.421798	NA	0.469543	0.00674427	0.0843275	-0.547047	0.383695	0.835999	-0.275685	0.657067	0.817266
Zfp229	-0.469243	0.006576	0.0583421	-0.717958	6.56446e-07	8.72545e-06	-0.16604	0.469102	NA	0.457686	0.261291	0.768645	-2.26313	6.15e-06	0.000218026
Fnip1	0.464374	0.00657417	0.0583421	0.506766	7.86646e-06	7.80478e-05	0.350529	0.0915236	0.416479	-0.20884	0.550846	0.903288	-0.311589	0.34864	0.580586
Ctdsp1	0.426713	0.00659188	0.0584458	0.310382	0.00572026	0.0206188	0.534248	0.00376026	0.0560778	0.179441	0.557363	0.906108	0.532266	0.0961736	0.267572
Trappc9	-0.363159	0.00661841	0.0586437	-0.122527	0.347827	0.495857	-0.327434	0.0296005	0.218289	-0.311683	0.194741	0.704886	-0.234661	0.219627	0.441121
Pik3r6	0.402676	0.00665181	0.0588273	-0.684597	0.00212297	0.00915633	0.580698	0.00069743	0.0164374	1.17273	0.0561488	0.442344	1.42273	4.14e-06	0.000160413
Mppe1	-0.421303	0.00665151	0.0588273	-0.549787	1.07725e-05	0.000102197	-0.359704	0.0351329	0.241424	0.0897746	0.675616	0.942623	-0.431403	0.0365416	0.141691
Hyou1	-0.395275	0.00666416	0.0588619	-0.300146	0.00679125	0.0237726	-0.771579	1.30973e-05	0.000665811	-0.667914	0.0194756	0.265569	-0.425206	0.0178271	0.0872285
Tfdp2	0.400406	0.00666393	0.0588619	0.501067	5.07792e-05	0.000393903	0.261368	0.121049	0.478445	-0.306492	0.207084	0.714296	0.113862	0.470267	0.684561
Kcnab2	-0.404386	0.00668916	0.0590452	0.292112	0.0909331	0.185347	-0.359163	0.0436705	0.27725	-0.777773	0.00240223	0.0843695	-0.332886	0.0442496	0.160928
Dtnb	0.359808	0.00669407	0.0590511	0.564516	1.82435e-05	0.000160132	0.281276	0.049657	0.297985	-0.375639	0.0868386	0.525452	-0.0783135	0.78077	0.892225
C730034F03Rik	0.42726	0.00672234	0.0592629	0.368411	0.0013551	0.00631709	0.419778	0.0150011	0.143665	-0.00273736	0.994057	1	-0.490096	0.534097	0.733944
Mrpl23	-0.460441	0.00675118	0.0594795	-0.386645	0.0229071	0.0628864	-0.371289	0.0589153	0.330235	-0.0970852	0.75026	0.960383	-0.595952	0.0284964	0.119832
Rp2h	0.446625	0.00677449	0.0595795	0.283617	0.0588704	0.13271	0.517007	0.017358	0.156695	0.252458	0.511247	0.893677	1.10728	0.000309517	0.00474196
Zfp213	-0.469571	0.00677536	0.0595795	-0.700349	4.8879e-09	1.04208e-07	-0.142061	0.44364	0.79719	0.476705	0.0675271	0.474729	-0.00346665	0.984845	0.99278
Dlg4	-0.411301	0.0067832	0.0596109	0.346086	0.510349	NA	-0.338758	0.0446154	0.280184	-0.707995	0.122044	0.599586	-0.770377	0.0111399	0.0633558
Ppp2r5d	-0.391756	0.00678886	0.059623	-0.888749	3.70197e-12	1.398e-10	-0.180537	0.302706	0.703201	0.576579	0.0555649	0.440207	-0.314415	0.034409	0.13629
Alpk1	-0.385372	0.00680604	0.059661	-1.02659	7.9209e-06	7.8508e-05	-0.257988	0.0833698	0.394717	0.67466	0.141438	0.639291	-1.09851	4.87e-05	0.00112333
Zbed4	0.413833	0.00680206	0.059661	0.333918	0.00893511	0.0296811	0.402644	0.011881	0.124851	-0.000908907	0.997037	1	0.47556	0.015256	0.0780153
Nup93	0.399365	0.00679818	0.059661	0.463405	9.08733e-05	0.000646262	0.157019	0.333365	0.728127	-0.401697	0.1826	0.685078	0.227771	0.0770054	0.231615
Tfeb	0.417714	0.00681243	0.0596795	0.564282	2.84364e-05	0.000235392	0.455491	0.012115	0.126027	-0.123575	0.668292	0.939902	1.15557	3.75e-06	0.000148021
Nhp2	-0.408342	0.00683274	0.0598197	-0.678256	1.4325e-06	1.74026e-05	-0.167622	0.381484	0.758448	0.408376	0.0936745	0.540301	-0.736024	0.00060693	0.00777675
Casp9	0.429908	0.00684996	0.0598577	0.472629	0.000820487	0.00415836	0.245408	0.173954	0.575262	-0.304114	0.226275	0.733192	1.04614	0.000444643	0.00617764
Gltpd1	-0.424661	0.00684956	0.0598577	-0.583382	3.03312e-05	0.000249649	-0.372782	0.0578651	0.326581	0.0772767	0.751893	0.960383	-0.545378	0.0596325	0.195587
Parp6	0.432702	0.00684915	0.0598577	0.399548	0.000537858	0.00290324	0.173066	0.392499	0.766319	-0.297948	0.349319	0.820797	-0.202662	0.547339	0.743891
Cpt1a	0.397653	0.00685497	0.0598583	0.720021	1.07125e-08	2.13004e-07	0.263116	0.142239	0.519637	-0.528632	0.0441756	0.401198	1.27349	0.00464187	0.0338953
Akap9	0.376382	0.00685863	0.0598583	0.295205	0.00759268	0.0259928	0.32794	0.0339556	0.237265	-0.0600805	0.81481	0.973617	0.332647	0.1772	0.389163
Fam43a	-0.433368	0.00687583	0.0599709	-0.360083	0.000437428	0.00243124	-0.599764	0.00121091	0.0253636	-0.407284	0.134122	0.623966	-2.10228	1.23e-07	1.09e-05
Cab39l	0.391362	0.00689905	0.0601357	0.0494664	0.648341	0.761151	0.529433	0.00547872	0.0730969	0.45573	0.123583	0.603022	0.585354	0.0055566	0.0382076
Zbtb44	0.418145	0.0069072	0.0601691	0.379684	0.00076655	0.00391226	0.345567	0.0423051	0.27276	-0.125955	0.680152	0.943624	0.433962	0.00559566	0.0383728
Dusp14	0.545373	0.00692642	0.0602988	0.106696	0.87233	NA	0.629183	0.00540589	0.0724722	0.409555	0.559097	0.907009	0.0629196	0.925928	0.966571
Parvg	-0.408406	0.00697927	0.0606591	-0.862575	0.0291943	0.0763187	-0.322982	0.0652251	0.348831	0.483734	0.312235	0.800581	0.0879179	0.53703	0.736336
Il27ra	-0.432006	0.00700997	0.0608292	-0.642351	0.00101303	0.00498988	-0.386898	0.0385591	0.256735	0.15558	0.552632	0.904181	-0.634179	0.137272	0.333561
Mlkl	-0.404898	0.00700692	0.0608292	-1.11345	6.49091e-11	1.97012e-09	-0.125348	0.456619	0.804886	0.894925	0.00447747	0.121288	-0.355648	0.179827	0.392569
Dnaja3	-0.36677	0.00701355	0.0608292	-0.273677	0.67278	NA	-0.283558	0.0867888	0.403633	-0.0288168	0.960173	0.998081	-0.0555235	0.736076	0.866427
Trim44	0.440604	0.00703038	0.0609373	0.467785	0.503292	NA	0.506124	0.00565573	0.0743897	-0.54382	0.558578	0.90685	0.445119	0.010256	0.0601229
Endod1	-0.39245	0.00704327	0.0609989	-0.214959	0.0711246	0.153788	-0.313899	0.0752691	0.376351	-0.202662	0.381186	0.835827	-2.49501	1.72e-11	9.54e-09
Tfe3	-0.443672	0.00704625	0.0609989	-0.711649	5.494e-05	0.000419827	-0.296966	0.139404	0.514083	0.293409	0.236124	0.741286	-0.750137	6.69e-05	0.0014379
Ifrd2	-0.434713	0.00706755	0.0611073	-0.514504	6.67195e-06	6.77134e-05	-0.623264	0.000788435	0.0181223	-0.247833	0.282108	0.781151	-0.690702	0.000512806	0.00684941
Utp20	-0.365009	0.00706503	0.0611073	-0.577262	0.000659082	0.00346356	-0.364647	0.017451	0.157127	0.103318	0.750596	0.960383	-0.848901	0.0262646	0.113688
Rnf11	0.443914	0.00708201	0.0611564	0.153106	0.825534	NA	0.513126	0.0075694	0.0911986	0.255925	0.773008	0.965	0.367695	0.0342204	0.135839
Hadhb	0.441503	0.00707963	0.0611564	0.33401	0.0057355	0.0206508	0.413838	0.0244627	0.193823	0.0275455	0.92483	0.991685	0.284212	0.14104	0.338402
Spa17	-0.488931	0.00709719	0.0612495	-0.972786	3.9931e-05	0.000318109	-0.0155011	0.949113	NA	1.01314	0.0580753	0.448183	-2.18709	0.00577673	0.0393607
Slc11a2	-0.395009	0.00712346	0.0614002	0.372018	0.584576	NA	-0.316022	0.0655645	0.349502	-0.771985	0.215966	0.722484	-0.886699	0.000185692	0.00320676
Hook3	0.393097	0.00712117	0.0614002	0.304469	0.00668334	0.0234652	0.33484	0.0556987	0.319533	-0.0460764	0.869924	0.98185	0.271133	0.136268	0.331943
Fos	-0.494558	0.00718124	0.0618217	-0.623646	1.85155e-05	0.000161936	-0.389266	0.130066	NA	0.06576	0.837357	0.978101	0.443513	0.717312	0.854986
Rtkn2	0.407122	0.00721088	0.0620003	0.623333	8.96128e-06	8.66169e-05	0.167834	0.283333	0.687723	-0.49972	0.0808076	0.512959	0.678303	0.00164183	0.015766
Col6a6	-0.385314	0.00721677	0.0620126	-1.01762	0.126334	NA	-0.299424	0.0719119	0.367447	1.16973	0.1146	0.583817	-0.806427	0.0282386	0.118949
Aplp2	0.394523	0.00722238	0.0620225	0.405558	0.000222285	0.00138297	0.186406	0.229471	0.640237	-0.319978	0.207791	0.715498	0.321247	0.209838	0.429986
St6galnac6	-0.403048	0.00722802	0.0620327	-1.53114	9.69893e-07	1.23849e-05	-0.294596	0.0959348	0.4262	1.18736	0.000766778	0.0394191	-0.402963	0.0671317	0.21119
Snx6	0.409161	0.0072649	0.0623108	0.40922	7.89761e-05	0.000574656	0.428855	0.0212516	0.177573	-0.0695728	0.825657	0.976006	0.350878	0.0133019	0.0711778
Csnk1e	0.429151	0.00727778	0.0623829	-0.770806	0.199537	NA	0.505317	0.00685149	0.0849817	1.4991	0.0150261	0.228763	0.328041	0.0116904	0.0651421
Capsl	-0.52024	0.00731541	0.0626669	-0.271756	0.665479	NA	-0.475715	0.0133182	0.134077	-0.279889	0.690519	0.94552	3.02284	1.35e-06	6.88e-05
Kdelr1	-0.40734	0.0073441	0.062874	-0.57253	2.76502e-06	3.11441e-05	-0.380447	0.0349341	0.240533	0.0440818	0.883022	0.982948	-0.335212	0.247194	0.474428
Ptpra	0.370128	0.00738009	0.0631045	0.437636	3.92415e-05	0.000313385	0.214343	0.155439	0.543724	-0.34045	0.256718	0.764994	0.439559	0.0185029	0.0893096
9130023H24Rik	-0.43157	0.00738003	0.0631045	-0.495167	0.00358739	0.0140765	-0.416342	0.0170434	0.154994	-0.0270395	0.937712	0.994189	0.771041	0.0233518	0.104677
Slc29a1	-0.441917	0.00738912	0.063143	-0.340188	0.452418	NA	-0.360519	0.0613285	0.336949	-0.248482	0.591061	0.916566	-0.928401	1.56e-07	1.34e-05
Psph	-0.389076	0.00740858	0.0632704	-0.228438	0.131058	0.244383	-0.449301	0.00521557	0.0707378	-0.327286	0.238469	0.744144	0.0208205	0.930918	0.968561
Pde3b	0.493668	0.00741568	0.0632923	0.27029	0.0472964	0.111971	0.545939	0.00881917	0.100927	0.266545	0.443472	0.864481	0.47534	0.00724003	0.0469622
Gimap9	-0.422633	0.00744374	0.063454	-0.627718	0.000827843	0.00418687	-0.135853	0.486532	0.819258	0.387688	0.47825	0.882012	-1.29829	5.49e-06	0.000200352
Surf6	-0.389957	0.00744006	0.063454	-0.373833	0.00349192	0.0137852	-0.535369	0.00171348	0.0325164	-0.295652	0.23809	0.743293	-0.663026	0.000611039	0.00781378
Glipr2	-0.368909	0.00745865	0.0635422	-0.26242	0.161376	0.285195	-0.348862	0.0215548	0.17946	-0.192536	0.487141	0.884375	0.30958	0.219958	0.441577
Rpl10	-0.396808	0.00747402	0.0636342	-0.348435	0.0133755	0.0410004	-0.754498	1.06151e-05	0.000549656	-0.544755	0.315439	0.801602	0.459209	0.0131304	0.0705854
Zfp692	-0.423267	0.00748588	0.0636963	-0.726584	4.72254e-06	5.00184e-05	-0.301052	0.115584	0.467469	0.304437	0.241755	0.747287	-1.03844	0.00477085	0.0344181
Ppfibp1	0.410213	0.00750883	0.0638526	0.634444	2.54673e-05	0.000212985	0.114544	0.477423	0.815073	-0.590831	0.028418	0.325086	0.131551	0.58598	0.769666
Iars	-0.357721	0.00751625	0.0638767	-0.430959	0.000941938	0.00468708	-0.322093	0.0354264	0.242723	-0.0269156	0.930762	0.99265	-0.221918	0.175291	0.386152
Traf2	0.381239	0.00753052	0.0638852	0.410084	0.000244839	0.00149653	0.186312	0.243685	0.65325	-0.322347	0.264454	0.770993	0.252481	0.124616	0.315484
Ndufa3	-0.482796	0.00753152	0.0638852	-0.762712	5.44231e-07	7.36451e-06	-0.0542611	0.791765	NA	0.590071	0.175906	0.678883	-0.168719	0.333841	0.566327
4930402H24Rik	0.376907	0.0075356	0.0638852	-0.0594761	0.673335	0.778856	0.499942	0.00259403	0.0431849	0.534404	0.0299337	0.330541	0.185829	0.516358	0.72177
Ift88	0.403818	0.00752287	0.0638852	0.308716	0.0228703	0.0628031	0.26291	0.133696	0.50372	-0.138275	0.670848	0.940629	-0.102565	0.742644	0.869429
Ddx56	-0.447045	0.00754145	0.0638959	-0.556783	2.84057e-05	0.000235338	-0.539474	0.00410936	0.0599364	-0.110097	0.702898	0.948709	-0.521144	0.00143904	0.0143641
Fbxo33	0.463662	0.00757172	0.0640744	0.414314	0.00193695	0.00847787	0.575978	0.00282604	0.0461356	0.146779	0.708269	0.950822	-0.146994	0.541833	0.739401
Hinfp	0.407951	0.00758816	0.0641356	0.372963	0.00266909	0.0110762	0.0691082	0.696146	0.914718	-0.399039	0.127163	0.610887	0.0267584	0.897386	0.955107
Tmem8b	0.4627	0.00759389	0.0641452	0.656734	0.0265732	0.0709906	0.51354	0.00808093	0.0948266	-0.180944	0.632035	0.930578	2.12202	0.0196762	0.0932264
Tspan3	0.445365	0.00764125	0.064467	0.449712	0.00332887	0.0132597	0.210402	0.245937	0.656508	-0.324159	0.247571	0.754366	0.31968	0.185998	0.399816
Fbl	-0.41824	0.0077214	0.0651037	-0.46282	5.36756e-05	0.000412105	-0.543028	0.00222925	0.0388141	-0.20471	0.525403	0.896748	-0.4439	0.0282713	0.119036
Psmc2	-0.399532	0.00774281	0.0652448	0.00827446	0.974842	0.985258	-0.349691	0.0458871	0.285212	-0.456053	0.169488	0.672509	-0.425281	0.0403005	0.15176
Tspo	0.389645	0.00776912	0.0654142	1.1739	1.06909e-14	5.48216e-13	0.0394699	0.833931	0.960075	-1.25854	9.93733e-06	0.00186636	0.766858	0.0486799	0.171239
Ammecr1l	-0.374741	0.0077723	0.0654142	-1.10152	1.73785e-11	5.79857e-10	-0.070477	0.645232	0.893866	0.947069	0.000583745	0.0328905	0.0474405	0.825864	0.915936
Psmc6	-0.390878	0.00778132	0.0654505	-0.711441	1.3775e-06	1.69243e-05	-0.0544535	0.80535	0.949769	0.585465	0.181859	0.684678	-0.223448	0.112009	0.29443
Arid3b	0.388433	0.00780929	0.0655341	1.21462	2.50632e-18	1.93802e-16	-0.0388899	0.800762	0.948339	-1.42911	6.98039e-06	0.00144597	1.12529	1.46e-06	7.3e-05
Gpr113	0.465961	0.00781338	0.0655341	0.623029	0.0921776	0.187023	0.53094	0.00602665	0.0777991	-0.178476	0.67624	0.942888	0.755109	0.0153863	0.0783853
Syde2	-0.38927	0.00780289	0.0655341	-0.39893	0.0158079	0.0469134	-0.367206	0.0332219	0.234184	-0.0986976	0.676309	0.942888	-0.407637	0.262144	0.491627
Rala	0.446763	0.00781478	0.0655341	0.376531	0.00376797	0.0146444	0.322569	0.0951347	0.424993	-0.0743335	0.796423	0.969529	0.104091	0.524401	0.726961
Plekhf2	0.446945	0.00780756	0.0655341	0.576197	6.19759e-07	8.31724e-06	0.419153	0.0328827	0.232787	-0.181569	0.537574	0.900079	0.100632	0.534716	0.734321
Zfp617	-0.410904	0.00785627	0.0658424	NA	NA	NA	-0.330935	0.0679342	0.355201	-0.931577	1	1	-0.0725061	0.844098	0.926374
Pno1	-0.428475	0.0078752	0.0659613	-0.616109	8.19199e-05	0.000591657	-0.384505	0.122776	NA	0.0745037	0.836666	0.977787	0.0344199	0.880894	0.945975
Phactr1	0.361557	0.00790027	0.0660564	-0.823584	0.232106	NA	0.435387	0.00197025	0.035949	1.42114	0.0392134	0.376523	3.21322	1.96e-06	8.75e-05
Osgepl1	-0.413603	0.00790077	0.0660564	-0.678318	1.90817e-06	2.26447e-05	0.0603376	0.788711	NA	0.674143	0.0697072	0.478714	-0.647657	0.0297214	0.123432
Rps19	-0.401128	0.00791228	0.0661129	-0.339548	0.00177421	0.00789323	-0.412309	0.0190136	0.165836	-0.186545	0.446126	0.867135	-0.194354	0.616005	0.790293
Hint3	0.423459	0.00791978	0.0661359	0.395224	0.000217357	0.00135751	0.231775	0.277889	0.682591	-0.210155	0.565844	0.907746	-0.311906	0.6003	0.779352
Ric8b	-0.363857	0.00795613	0.0663996	-0.615749	1.79617e-06	2.13938e-05	-0.347225	0.0308923	0.224405	0.134119	0.668243	0.939902	-0.75481	0.00451949	0.0332053
Pros1	-0.39527	0.007977	0.066509	-1.47655	3.49587e-15	1.90281e-13	0.00324042	0.987246	0.998235	1.45939	1.14648e-05	0.00207496	-1.50909	0.000250425	0.00404036
Ahsa2	0.414648	0.00798395	0.066509	0.335395	0.0108628	0.0346891	0.293194	0.0817948	0.390237	-0.150442	0.663862	0.939155	0.727162	0.00108139	0.0116955
Ggta1	-0.344814	0.00798025	0.066509	-0.553454	0.0606863	0.135705	-0.26458	0.0877668	0.406051	0.202399	0.717855	0.952345	0.462686	0.0313571	0.128263
Enpp4	0.481171	0.00798834	0.066509	0.425999	0.0167011	0.0490118	0.400853	0.0883531	NA	-0.0316065	0.924313	0.991685	0.891703	0.110446	0.291765
Zfp398	0.423006	0.00803774	0.0668803	0.353725	0.00263616	0.0109621	0.414721	0.0170039	0.154953	0.0217749	0.922215	0.991628	-0.147221	0.626168	0.79748
Rhoq	0.419673	0.00807117	0.0671184	0.549794	1.27254e-05	0.000117187	0.280824	0.0993435	0.434596	-0.323843	0.138579	0.632911	0.138596	0.72829	0.861523
Casd1	0.438478	0.00808701	0.06721	0.323558	0.0291655	0.0762639	0.516067	0.00559721	0.0738991	0.141671	0.625276	0.929653	-0.136518	0.539055	0.737777
Tsga10	0.418008	0.00809915	0.0672708	0.903818	6.47679e-09	1.34587e-07	0.296515	0.0679865	0.355341	-0.641847	0.0388046	0.374385	1.21339	0.00812483	0.0508779
Strbp	0.464975	0.00811101	0.0673033	0.204349	0.168457	0.29403	0.522155	0.00602264	0.0777991	0.284813	0.358579	0.82589	0.404924	0.00545772	0.0377719
Tm2d3	0.422001	0.00813825	0.0674346	0.217164	0.747933	NA	0.494006	0.00834111	0.0970103	-0.256141	0.820407	0.974667	-0.201114	0.505137	0.713475
Nup107	-0.353604	0.00813388	0.0674346	-0.545629	2.48895e-06	2.83728e-05	-0.325057	0.0265252	0.204466	0.118186	0.603538	0.922055	-0.187086	0.547764	0.744232
Rbpjl	0.434541	0.0081635	0.0676037	-0.0567374	0.855385	0.911769	0.547045	0.00317243	0.0495965	0.599457	0.0727518	0.488708	2.20946	0.00113923	0.0121258
Art5	-0.496761	0.00816946	0.0676128	-1.07591	2.62296e-05	0.00021861	-0.185725	0.406441	0.776453	0.692614	0.293672	0.791037	-0.024249	0.943223	0.973083
Mtmr3	0.375269	0.00819618	0.0677535	0.467888	0.000335321	0.00195865	0.334008	0.0320258	0.228997	-0.229974	0.410573	0.84958	0.387585	0.0338636	0.134842
Zdhhc20	0.390964	0.00820673	0.0678005	0.321765	0.0180227	0.0521364	0.257303	0.128907	0.493959	-0.134089	0.666908	0.939565	0.264039	0.0993056	0.27298
Cd68	-0.439142	0.00821599	0.0678367	-0.570845	0.000502076	0.00273586	-0.27483	0.148634	0.532079	0.188997	0.585225	0.915346	-0.199453	0.674158	0.827146
Fbxo34	0.380736	0.00825736	0.0681379	0.455697	0.00043133	0.0024057	0.27616	0.0811856	0.388473	-0.30052	0.266373	0.77152	0.105536	0.490986	0.701983
Idh2	-0.433664	0.00830553	0.0684948	-0.407643	0.00278141	0.0114488	-0.560099	0.00309863	0.0488797	-0.290214	0.322727	0.805805	-0.226545	0.262462	0.492001
Chrnb1	0.419075	0.00831743	0.0685524	0.399525	0.00469748	0.0175826	0.551859	0.003674	0.0550862	0.12039	0.648362	0.934861	0.552694	0.230051	0.452723
Slc46a1	0.45452	0.00833945	0.0686932	0.424194	0.0124333	0.0387307	0.494958	0.0192057	0.16668	0.0392138	0.889023	0.982982	1.36214	0.00290403	0.0243503
Trub1	-0.397593	0.00839679	0.0690838	-0.792812	4.97768e-08	8.43435e-07	-0.224049	0.180174	0.58188	0.463343	0.189013	0.693703	-0.325691	0.154761	0.356895
Zfp566	-0.4285	0.00840835	0.0691153	-0.6545	1.53583e-06	1.86347e-05	-0.36342	0.0778159	0.382526	0.174238	0.524267	0.895872	-0.414289	0.132029	0.325531
Art1	-0.451829	0.00842081	0.0691567	0.196371	0.751658	NA	-0.379029	0.0480864	0.29248	-0.743397	0.235014	0.740536	0.301847	0.387259	0.614701
Usp33	0.387779	0.00843047	0.0691567	0.420854	0.000399843	0.00227285	0.204	0.195207	0.600892	-0.321288	0.311299	0.800115	-0.0796268	0.768788	0.885739
Dnajc21	0.423974	0.00843589	0.0691604	0.462845	0.000325184	0.00190974	0.299767	0.0969345	0.42782	-0.260471	0.324751	0.805951	0.648846	0.100065	0.273922
Il15ra	-0.389853	0.00848447	0.0695178	-1.24095	1.88208e-10	5.37746e-09	-0.136786	0.417255	0.781042	1.02647	0.0104722	0.195343	-1.02322	2.28e-05	0.000619087
Tmem86a	0.428025	0.00850577	0.0696513	0.774391	2.11245e-06	2.44728e-05	-0.422847	0.041341	NA	-1.33135	4.00241e-06	0.000939632	0.962669	0.00323409	0.0264066
B3galt4	-0.430098	0.00853257	0.0698297	-0.441543	2.7008e-05	0.00022433	-0.477456	0.0166027	0.152949	-0.200254	0.529129	0.898097	0.267556	0.697558	0.842695
Ccdc51	-0.425569	0.00858874	0.0702481	-0.494878	0.00395555	0.0152036	-0.383333	0.0316658	0.227123	0.0095269	0.979208	1	-0.167538	0.394444	0.62009
Dbi	-0.419621	0.00860484	0.0703385	-0.621839	1.76363e-07	2.68485e-06	-0.191228	0.295807	0.696449	0.332606	0.125458	0.607078	0.0687581	0.829845	0.918111
Zfp592	0.379945	0.00861264	0.070361	0.463768	3.48693e-05	0.000282874	0.260383	0.0848947	0.398824	-0.33145	0.302165	0.795421	0.215941	0.180707	0.393319
Mknk1	0.369012	0.00862175	0.0703941	0.481911	7.28477e-05	0.000538918	0.145944	0.348973	0.737964	-0.450447	0.136187	0.626904	0.485193	0.00239835	0.021138
Jak3	-0.395125	0.00862762	0.0704008	-0.374792	0.000719293	0.00372373	-0.332344	0.0562604	0.321432	-0.0821586	0.743977	0.959207	-0.440873	0.0116122	0.0649409
Zdhhc24	0.428038	0.00867977	0.0707848	0.419034	0.000446581	0.00247499	0.24569	0.195387	0.601051	-0.243993	0.285319	0.784404	0.467882	0.0982167	0.271197
Map3k1	0.32233	0.00871698	0.0710052	0.361207	0.00165702	0.00747079	0.327008	0.0197278	0.169281	-0.1293	0.568886	0.908272	0.54631	0.188501	0.402686
Syf2	0.436774	0.00873082	0.0710764	0.227219	0.0851431	0.176395	0.739893	0.000105024	0.00354919	0.542465	0.106684	0.567504	0.338074	0.170329	0.379982
Kif3c	0.385014	0.00874779	0.0711729	0.406386	0.00320065	0.0128435	0.26202	0.108677	0.453215	-0.226791	0.389096	0.839456	0.769924	0.00314838	0.0258702
Rnf214	0.403052	0.00879995	0.0715554	0.382404	0.000680601	0.00356511	0.422306	0.0161051	0.150253	-0.0027376	0.991237	1	0.0109398	0.953043	0.977675
Cpm	0.378767	0.00886262	0.072023	0.971707	8.1369e-13	3.31706e-11	0.085567	0.574262	0.862601	-1.0213	0.000494851	0.0296616	0.230983	0.521834	0.725121
Tsc22d3	-0.354667	0.00887284	0.0720561	-0.319928	0.468086	NA	-0.27567	0.0799208	0.386131	6.71818e-05	0.999849	1	0.462697	0.13483	0.329299
Dag1	0.388154	0.00893803	0.0723178	0.397403	0.00810486	0.0274481	0.29407	0.0548763	0.316874	-0.230955	0.490708	0.886007	0.976547	0.0183353	0.0887555
Vti1b	0.424306	0.00893221	0.0723178	0.33123	0.00445097	0.0167695	0.490077	0.00787976	0.0933309	0.152812	0.530859	0.898675	0.100665	0.671604	0.82567
Ube2j1	0.417871	0.00893151	0.0723178	0.284853	0.0229579	0.0630081	0.303534	0.0830125	0.393695	-0.0600712	0.804039	0.970843	0.046843	0.778298	0.891044
Lonrf1	0.39926	0.00894043	0.0723178	0.372795	0.00457161	0.0171907	0.456477	0.007818	0.0929101	0.0564967	0.826706	0.97614	0.0343076	0.857944	0.933664
Pfkl	-0.41123	0.00893332	0.0723178	0.0925701	0.538141	0.671181	-0.420183	0.0114353	0.121496	-0.654714	0.07502	0.493957	0.0523812	0.880203	0.945598
Fam96b	-0.435051	0.00895286	0.0723763	-0.809579	1.38384e-10	4.07334e-09	-0.0159047	0.934191	0.985858	0.720266	0.0111595	0.198696	-0.298365	0.168866	0.377684
Tapbpl	0.433709	0.00898344	0.0724979	0.577535	0.0085184	0.0285402	0.452394	0.01208	0.125933	-0.286085	0.573002	0.910247	1.30127	1.15e-05	0.000362968
Stk16	-0.369171	0.00897906	0.0724979	-0.16476	0.1221	0.231345	-1.01883	1.77748e-08	1.88997e-06	-1.04665	0.000309481	0.0223556	-0.667202	0.000199164	0.00337997
B3galt5	-0.382835	0.00898351	0.0724979	0.403836	0.531323	NA	-0.321351	0.0339826	0.237265	-0.88831	0.1145	0.583536	-0.62007	0.11486	0.29871
Fbxo44	0.4708	0.00904493	0.0728669	-0.0444877	0.919735	0.954209	0.568976	0.00524254	0.0709916	0.522877	0.313392	0.80066	0.757729	0.00313106	0.0257502
Prpf38a	0.405526	0.00904248	0.0728669	0.119364	0.450618	0.592732	0.519769	0.0084035	0.0975436	0.395739	0.360608	0.826475	0.0537327	0.794674	0.898762
Mocs1	-0.384798	0.00906322	0.072972	-0.758376	8.48432e-11	2.55922e-09	-0.0975155	0.569209	0.860094	0.571507	0.00567462	0.138292	0.104387	0.631555	0.800867
Dusp1	0.413731	0.00908911	0.0731286	0.35338	0.000718091	0.00371949	0.618535	0.00204883	0.0368234	0.230396	0.46894	0.877466	1.22841	0.10817	0.287717
C130040N14Rik	0.45044	0.00909316	0.0731286	0.234992	0.165984	0.291122	0.499043	0.0165058	0.152359	0.237386	0.621445	0.928466	1.21789	0.137517	0.333903
Ddn	-0.464123	0.00910077	0.0731475	-0.922077	0.000124812	0.000855164	-0.277006	0.175715	0.576928	0.573879	0.160372	0.662267	-0.75072	0.0272228	0.116427
Lcor	0.426364	0.00911667	0.0731909	0.298724	0.00672515	0.0235864	0.479019	0.0103566	0.113767	0.149585	0.580726	0.913672	0.382633	0.335595	0.568472
Eri2	0.430132	0.0091601	0.0734971	0.315986	0.015148	0.0452583	0.39975	0.0735533	0.371743	0.0821628	0.80248	0.970843	-0.314125	0.15183	0.353006
Tchp	-0.421704	0.00921797	0.0738764	-0.875612	2.26001e-08	4.21825e-07	-0.214554	0.242993	0.652266	0.553377	0.0488421	0.418846	-0.436992	0.126261	0.318069
Acsl3	0.392171	0.00926145	0.074146	0.265847	0.0157904	0.0468757	0.374475	0.0234877	0.189658	-0.0493112	0.90139	0.986187	0.419563	0.0785539	0.234614
Nkiras1	-0.377783	0.00926565	0.074146	-0.699976	6.92259e-08	1.13738e-06	-0.226384	0.193565	0.598862	0.362488	0.282489	0.781449	-0.356356	0.535016	0.734654
Gtpbp6	-0.43131	0.00933757	0.074663	-0.520522	2.33911e-06	2.68749e-05	-0.356402	0.0608763	0.335733	0.0374177	0.900588	0.985787	0.150648	0.627624	0.798424
Prmt7	-0.383335	0.0093431	0.0746644	-0.457988	7.3269e-06	7.33669e-05	-0.585512	0.000231862	0.00660452	-0.292717	0.288963	0.786993	-0.464104	0.0284116	0.119587
Acap3	0.402476	0.00936614	0.0748056	0.566077	0.000125426	0.000858162	0.448672	0.0133364	0.134077	-0.176292	0.548631	0.90254	0.388155	0.0206934	0.0963828
Hdac5	-0.361643	0.00938395	0.0749049	0.517243	0.000191101	0.00121448	-0.515131	0.00228107	0.0393717	-1.20933	0.000168615	0.0143591	-0.4931	0.0252488	0.110999
P2ry10	0.756928	0.00939579	0.0749565	0.858963	0.174001	NA	0.881722	0.0054541	0.0728381	0.0495371	0.969382	1	1.99521	7.03e-09	9.97e-07
Ptpn18	-0.415745	0.00941825	0.0750927	-1.16998	2.67499e-05	0.000222565	-0.303562	0.106495	0.448012	0.777961	0.0099159	0.189006	-0.476715	0.189101	0.403591
Fbxl19	-0.410476	0.00945186	0.0752238	-0.306308	0.233694	0.374302	-0.402612	0.0199633	0.170561	-0.213445	0.544958	0.902137	-0.625441	5.71e-06	0.000207119
Cd2ap	0.428019	0.00944731	0.0752238	0.40766	0.0152291	0.0454447	0.382777	0.0448265	0.280756	-0.0756161	0.823466	0.975732	0.350062	0.0842308	0.245479
Sec14l2	-0.35632	0.00945589	0.0752238	-0.685341	0.000410471	0.00231973	-0.234848	0.160314	0.551456	0.37365	0.659867	0.93746	0.0474227	0.86955	0.939724
Aak1	0.362698	0.0094563	0.0752238	0.661456	1.94947e-06	2.29879e-05	0.126245	0.456789	0.804886	-0.626745	0.038764	0.374385	-0.0813729	0.89681	0.955015
Nup210l	-0.405923	0.0094952	0.0754901	-0.389496	0.240527	0.382114	-0.349787	0.0248245	0.195297	-0.0629174	0.869703	0.98185	-0.31154	0.278977	0.51027
Ttll12	-0.399931	0.00951833	0.0756308	-0.676633	4.28721e-07	5.94323e-06	-0.332525	0.0768764	0.380168	0.205467	0.528398	0.897722	-0.481651	0.0425485	0.15721
Ect2	0.349094	0.00968807	0.0768918	0.0711486	0.554661	0.685621	0.427286	0.0131533	0.133108	0.303464	0.314425	0.801192	0.812873	0.00719983	0.0467892
Rpain	-0.370564	0.00974422	0.0772934	-0.313825	0.0374258	0.0929255	-0.385034	0.0177201	0.15854	-0.181147	0.409906	0.84958	0.183402	0.460521	0.674915
Hk1	-0.357147	0.00975869	0.0773641	-0.0701201	0.91967	NA	-0.27627	0.0887804	0.409235	-0.382653	0.617822	0.92699	-0.306405	0.113273	0.29634
Psip1	0.41927	0.0097829	0.0774679	0.372178	0.00238514	0.0100512	0.3957	0.0301394	0.220605	-0.035791	0.902857	0.986851	0.287045	0.179184	0.391766
Slc24a6	-0.405997	0.00983196	0.0777935	-0.150943	0.290633	0.437216	-0.474997	0.0123179	0.127471	-0.455008	0.0711329	0.482717	-0.41214	0.0325024	0.131181
Mapre1	0.43942	0.00983519	0.0777935	0.36646	0.00718194	0.0248486	0.310581	0.0758007	0.377351	-0.157347	0.617602	0.926962	0.0461196	0.799241	0.901292
As3mt	-0.426502	0.00985661	0.0778703	0.00651578	0.989676	NA	-0.38073	0.03073	0.223402	-0.515437	0.258014	0.766094	-1.70799	0.082392	0.242055
Setdb2	0.391146	0.00985805	0.0778703	0.218575	0.047575	0.112478	0.428585	0.0475171	0.290568	0.194297	0.572668	0.910143	0.458953	0.174396	0.385391
AB041803	0.345335	0.00986167	0.0778703	-0.192819	0.391842	0.538997	0.445902	0.00511739	0.0699511	0.61756	0.0568224	0.443927	-0.0217983	0.973605	0.987091
3110002H16Rik	0.361591	0.00990942	0.078203	0.332218	0.0021201	0.00914796	0.148691	0.383215	0.760173	-0.299605	0.341994	0.81553	0.0433221	0.801863	0.902805
Tmem229b	-0.353555	0.00997046	0.0785297	-0.0998877	0.631947	0.748487	-0.295007	0.0641226	0.345919	-0.297468	0.299743	0.794459	-0.89417	0.000908027	0.0103374
Kcna3	0.394643	0.00996655	0.0785297	0.412682	0.000339966	0.00197636	0.275108	0.105302	0.445227	-0.207948	0.465837	0.876576	1.16482	0.0751821	0.228066
Kctd21	0.427915	0.00997337	0.0785297	0.545359	0.00354487	0.013949	0.305734	0.0887866	0.409235	-0.312653	0.199464	0.708077	0.480931	0.479613	0.6924
Ngdn	-0.418077	0.0100245	0.0788876	-0.706018	3.21551e-05	0.000263046	-0.070778	0.721135	0.92331	0.566414	0.205774	0.71303	-0.0546566	0.739177	0.867995
Shmt1	-0.360898	0.0100382	0.0789513	0.289963	0.41882	0.562138	-0.306171	0.0435723	0.277012	-0.661147	0.036552	0.363866	-0.543062	0.0132321	0.0709019
Snx14	0.407229	0.0100716	0.0791689	0.29935	0.016879	0.0493703	0.374599	0.0283839	0.212902	0.000353938	0.999091	1	0.201959	0.408011	0.630773
Snx14	0.407229	0.0100716	0.0791689	0.29935	0.016879	0.0493703	0.374599	0.0283839	0.212902	0.000353938	0.999091	1	0.201959	0.408011	0.630773
Rabepk	-0.385588	0.0101013	0.0793203	0.00433593	0.971796	0.983607	-0.744905	6.72853e-05	0.00250342	-0.966168	0.00766359	0.16386	-0.938118	0.000115899	0.00223429
Tm6sf1	-0.395201	0.0101085	0.0793203	-0.521688	8.35333e-05	0.00060064	-0.313347	0.07532	0.376351	0.117011	0.726299	0.95348	-0.515588	0.00384705	0.029801
Eif4e	-0.380826	0.0101136	0.0793203	-0.818114	0.0314998	0.0812439	-0.294945	0.0946926	0.424284	0.480591	0.332547	0.810285	-0.145638	0.336089	0.568705
Dok4	-0.396691	0.0101542	0.0794597	-1.01436	3.25582e-06	3.59247e-05	-0.271734	0.13098	0.498475	0.654266	0.0151872	0.229725	-2.96658	1.87e-07	1.51e-05
BC024978	-0.394724	0.0101497	0.0794597	-0.699739	1.46876e-10	4.29735e-09	-0.129035	0.496398	0.82515	0.480237	0.0749248	0.493732	-0.386293	0.105065	0.282677
Ssh2	0.390138	0.0101685	0.0795265	0.193456	0.0705454	0.152977	0.435704	0.00981391	0.10961	0.169835	0.532062	0.899484	0.376787	0.00411746	0.0312037
Lamtor2	-0.428144	0.0101973	0.0796176	-0.589416	9.78741e-07	1.24489e-05	-0.204044	0.348416	NA	0.278729	0.337367	0.814094	-0.452598	0.0545286	0.183856
Trim24	0.405494	0.0101939	0.0796176	0.303032	0.0104935	0.0336876	0.302906	0.071116	0.365661	-0.0440717	0.852096	0.979511	-0.322609	0.0724196	0.22238
Numb	0.390979	0.0101917	0.0796176	0.380683	0.00841749	0.0282506	0.322778	0.0649357	0.347991	-0.16691	0.639929	0.933587	-0.0543813	0.782654	0.893052
Prim1	-0.363844	0.010207	0.0796488	-0.685076	2.94577e-06	3.27633e-05	-0.126468	0.487294	0.8201	0.445111	0.267743	0.772732	0.0897048	0.536615	0.736137
Ip6k2	0.3898	0.0102236	0.0797335	0.338841	0.00350321	0.0138241	0.306751	0.0551055	0.317307	-0.0944206	0.689617	0.945396	0.30292	0.357794	0.588258
Ip6k2	0.3898	0.0102236	0.0797335	0.338841	0.00350321	0.0138241	0.306751	0.0551055	0.317307	-0.0944206	0.689617	0.945396	0.30292	0.357794	0.588258
Pcnx	0.348427	0.0102579	0.0799569	0.217538	0.15925	0.282464	0.349772	0.0200726	0.170795	0.0503829	0.831417	0.97684	0.30574	0.0628861	0.2019
Rnf111	0.441439	0.0102665	0.0799788	0.274746	0.0329554	0.0840094	0.488493	0.0131588	0.133108	0.191648	0.54863	0.90254	0.518416	0.0488527	0.171515
Rpl7	-0.423583	0.0102795	0.0800351	-0.409206	0.204441	0.340781	-0.524768	0.00355532	0.0540044	-0.101557	0.859077	0.981273	0.0513852	0.830558	0.918747
Spice1	0.388519	0.0103103	0.0802299	0.250617	0.0469594	0.111428	0.51311	0.00295652	0.0473904	0.275577	0.350115	0.821208	0.168093	0.634538	0.802187
Slc35b2	-0.407212	0.0103189	0.0802521	-0.225647	0.0671547	0.14713	-0.550493	0.00405348	0.0594325	-0.49198	0.105109	0.564466	-0.389418	0.000291006	0.00452904
Rps15a	-0.350607	0.0103981	0.0807783	-0.414194	0.00433795	0.0164326	-0.363999	0.0268487	0.20528	-0.109541	0.782701	0.965967	-0.0409439	0.917159	0.962683
Ncoa6	0.379473	0.0104132	0.0808056	0.452993	0.00159786	0.0072578	0.316326	0.0473075	0.290133	-0.206325	0.375158	0.833241	0.328825	0.131575	0.324978
Ftl1	-0.456403	0.0104113	0.0808056	-0.642647	0.00874019	0.029133	-0.0857377	0.636572	0.890752	0.439381	0.241911	0.747601	0.0593363	0.72573	0.860359
Slc29a2	-0.405469	0.0104334	0.0809169	-0.463794	0.000820745	0.00415836	-0.547721	0.00377396	0.0561618	-0.221461	0.352935	0.822952	-1.87888	5.18e-05	0.00116983
Tmem40	-0.383289	0.0104539	0.0810311	-1.41668	0.000438259	0.00243441	-0.279692	0.101279	0.437437	1.13122	0.00548989	0.136572	-0.575515	0.0273053	0.116623
Pacs1	0.365519	0.0104742	0.081143	0.337455	0.0187513	0.0538248	0.251505	0.0981038	0.431069	-0.184719	0.520945	0.895142	0.591744	0.0101664	0.0596603
Dnajc11	-0.37268	0.0104806	0.0811474	-0.220461	0.0909839	0.185353	-0.40679	0.0157651	0.148273	-0.28472	0.239515	0.745594	-0.479995	0.000208888	0.00351229
Imp3	-0.39422	0.0105044	0.0811581	-0.456152	0.000221514	0.00137905	-0.284399	0.214864	0.62351	0.0460034	0.886012	0.982982	-0.772095	0.000218687	0.00364821
Micall1	0.374588	0.0104959	0.0811581	0.594244	8.38174e-07	1.08307e-05	0.288256	0.106139	0.447462	-0.413203	0.161102	0.664003	0.838403	0.0185976	0.0895295
Mrpl50	-0.395124	0.0105053	0.0811581	-0.583026	1.85679e-05	0.000161958	-0.281339	0.215766	NA	0.142466	0.790128	0.967853	-0.433236	0.0387024	0.147151
Mtor	-0.331303	0.0104944	0.0811581	0.100307	0.398869	0.544565	-0.463673	0.00246455	0.0418643	-0.71171	0.00971999	0.186534	-0.226396	0.270337	0.500876
Dhrs4	-0.412879	0.0105156	0.0811683	-0.806388	5.88892e-09	1.23655e-07	-0.105834	0.560873	0.856696	0.610794	0.023359	0.291145	-0.41345	0.00082162	0.0097449
Rwdd2a	0.518061	0.0105183	0.0811683	0.658687	0.00133405	0.00623686	0.00486648	0.986216	NA	-0.795547	0.0938364	0.540627	1.99699	0.00365553	0.0288601
Paox	-0.408128	0.0105711	0.0815306	-0.559996	2.81877e-06	3.16397e-05	-0.547279	0.00271037	0.0447307	-0.138184	0.632975	0.931087	-0.412533	0.0430127	0.158238
Zfp326	0.414716	0.0106132	0.0818105	0.39314	0.000424977	0.002381	0.266895	0.159178	0.549418	-0.192494	0.519212	0.894825	-0.272167	0.260706	0.489933
Melk	-0.372551	0.0106436	0.0819993	-1.00809	1.24116e-08	2.43313e-07	-0.18556	0.236237	0.646346	0.733089	0.00426352	0.11822	-0.548492	0.0014431	0.0143882
Siae	-0.41327	0.0106592	0.0820559	-1.09841	2.51531e-08	4.6414e-07	-0.173057	0.396717	0.769472	0.799135	0.0795048	0.507797	-0.893594	0.00413261	0.0312721
Eif1a	-0.363271	0.0106627	0.0820559	-0.631133	5.46321e-06	5.67463e-05	-0.283127	0.139438	0.514083	0.250148	0.447939	0.867427	-0.325286	0.0510107	0.17647
Dcaf5	0.350589	0.0106785	0.0821317	0.429992	0.000792079	0.00402778	0.335949	0.0259538	0.201105	-0.173447	0.387108	0.837677	0.474775	0.00698583	0.04579
Uimc1	0.416688	0.0106889	0.0821665	0.344402	0.00511772	0.0188372	0.215812	0.237875	0.647297	-0.214885	0.484623	0.883214	0.421776	0.180183	0.392809
Pkd1l3	-0.376279	0.0107302	0.082393	-0.873872	0.000466718	0.00257342	-0.265101	0.0856123	0.400973	0.597296	0.237227	0.742612	-0.776858	0.000464118	0.00636205
Gnptg	-0.38532	0.0107797	0.0826534	-0.100001	0.489227	0.627506	-0.689863	0.000209204	0.00612279	-0.812741	0.0140115	0.22276	-0.514387	0.0552035	0.185543
9130401M01Rik	0.384083	0.0107819	0.0826534	0.879918	3.08222e-07	4.44891e-06	0.452962	0.0107405	0.116424	-0.505598	0.0794364	0.507797	0.136667	0.687862	0.836924
St3gal5	-0.383005	0.0108392	0.0830471	0.222776	0.111197	0.215944	-0.829461	5.10929e-07	3.69752e-05	-1.23934	4.67965e-05	0.00578224	-2.21892	3.61e-08	3.83e-06
Gtpbp4	-0.375694	0.010873	0.0832603	-0.602853	5.22028e-05	0.000402702	-0.359572	0.0444552	0.279692	0.124159	0.701264	0.948491	-0.58461	0.00165562	0.0158865
Jam2	-0.45745	0.0109394	0.083586	-0.229324	0.620399	NA	-0.418596	0.0217845	0.18056	-0.341387	0.465855	0.876576	-2.71518	0.00287645	0.0241667
Trim41	-0.340205	0.0109236	0.083586	-0.0226856	0.838506	0.89993	-0.361837	0.0178025	0.158956	-0.430524	0.0207973	0.272349	0.129438	0.375459	0.603858
Mnd1	0.366141	0.0109396	0.083586	0.255949	0.0113554	0.0359908	0.397742	0.0129895	0.13226	0.0668154	0.753646	0.960383	0.0507724	0.863384	0.936484
Fchsd1	0.426323	0.0109677	0.0837552	0.45872	0.00367573	0.0143727	0.260883	0.189009	0.593754	-0.273639	0.31945	0.80528	1.11725	5.61e-09	8.33e-07
Tanc1	-0.324602	0.0109933	0.0839048	-0.000190675	0.998733	0.999143	-0.385561	0.00704882	0.0865048	-0.533853	0.0554574	0.439602	-0.710871	0.000350402	0.00514372
Slc1a4	-0.358124	0.0110323	0.08411	-0.573351	1.16293e-05	0.000109262	-0.285656	0.0755219	0.376636	0.147305	0.585313	0.915346	-0.673819	0.000892466	0.0102241
Arhgap12	0.395064	0.0110305	0.08411	0.421958	0.00119584	0.0057169	0.33413	0.0571066	0.324404	-0.146835	0.584442	0.915346	-0.17665	0.487516	0.698594
Ythdc2	0.418077	0.0110725	0.0843704	0.518049	5.00873e-05	0.000388845	0.252006	0.193178	0.598624	-0.303431	0.261659	0.768821	0.344646	0.25463	0.482636
Cic	0.364553	0.0110798	0.0843794	0.0592155	0.733801	0.824997	0.441306	0.010037	0.111327	0.374377	0.457826	0.873542	0.565926	5.67e-05	0.00126174
Arhgap17	0.326065	0.0111326	0.0847355	0.372032	0.00640614	0.0226223	0.17667	0.222106	0.63121	-0.322307	0.337857	0.814762	0.92114	3.61e-05	0.000895131
Slc9a7	0.441292	0.011147	0.0847988	0.69328	0.0018758	0.008256	0.371444	0.0603146	0.333428	-0.354314	0.298868	0.793864	-0.122768	0.836867	0.922846
Galk2	-0.355879	0.011168	0.0849102	-0.650913	0.00716321	0.0248102	-0.273836	0.0677834	0.355079	0.208657	0.693884	0.94644	-0.830868	0.000164328	0.00293173
Zdhhc21	0.424978	0.0111738	0.0849102	0.381469	0.00554987	0.0201462	0.497039	0.00989241	0.110233	0.102421	0.715315	0.951444	0.295164	0.201912	0.420153
Ppp2ca	0.406253	0.0111923	0.0849923	0.233636	0.0614179	0.136964	0.482129	0.0054999	0.0731218	0.178951	0.512573	0.893677	0.166775	0.144444	0.34398
Ap1g2	-0.388713	0.0111968	0.0849923	-0.339067	0.0287301	0.0753073	-0.41659	0.0186574	0.164169	-0.186218	0.607415	0.923382	-0.117713	0.409875	0.632582
Smarcd2	0.364826	0.011348	0.0860926	0.42367	0.000126799	0.000863921	0.286683	0.102065	0.439191	-0.205134	0.323739	0.805859	0.571997	0.00172471	0.0163799
Gbas	0.405333	0.0113683	0.0861532	0.394621	0.00359802	0.01411	0.200806	0.239087	0.648518	-0.273949	0.225741	0.732334	0.670093	0.00347471	0.0278719
Srpk1	-0.348893	0.0114494	0.0867147	-0.384728	0.00329034	0.0131438	-0.490239	0.000693484	0.0163999	-0.262576	0.347607	0.819479	-0.449214	0.00854604	0.0527391
Zfp707	0.379972	0.0114549	0.0867147	0.275939	0.0111692	0.0354902	0.452399	0.0190032	0.165836	0.170242	0.620945	0.928466	0.25965	0.404948	0.628551
Myl10	0.395616	0.0114634	0.0867319	-0.381883	0.136065	0.251751	0.506501	0.00320842	0.0501009	0.934074	0.0587358	0.449718	0.156886	0.474307	0.688244
Pikfyve	0.403459	0.0114785	0.0867988	0.371346	0.000979531	0.00484691	0.241964	0.261515	0.67	-0.192355	0.592117	0.916566	-0.161539	0.680046	0.831298
Rasip1	-0.405285	0.0114925	0.0868104	0.530949	0.394568	NA	-0.34336	0.0329401	0.232787	-1.24243	0.0506452	0.424636	-0.0884167	0.737	0.867105
Hspe1	-0.416915	0.011521	0.0869319	-0.497125	6.90139e-06	6.96069e-05	-0.479172	0.0138424	0.136745	-0.136277	0.751147	0.960383	-0.279142	0.305295	0.537505
Braf	0.404838	0.0115174	0.0869319	0.319598	0.0210165	0.0587219	0.359843	0.0537843	0.313457	-0.00484235	0.987061	1	0.264142	0.42097	0.642634
AW549877	0.430674	0.0115514	0.0871136	0.373786	0.000331333	0.00194118	0.340859	0.286407	0.689875	0.245414	0.626031	0.929653	0.234837	0.204855	0.424015
Tnfrsf12a	-0.420377	0.0115616	0.0871435	-0.567032	2.00894e-07	3.00663e-06	-0.0448009	0.854212	NA	0.337074	0.436892	0.862473	-0.0120778	0.980002	0.989692
Steap3	-0.382312	0.0116007	0.087229	0.106872	0.872214	NA	-0.298373	0.092021	0.417784	-0.336371	0.757873	0.961752	-0.456279	0.00202166	0.0184664
Sgsh	0.428423	0.0115821	0.087229	1.22355	2.18359e-06	2.5207e-05	0.200452	0.303655	0.703696	-1.16101	0.00609162	0.144374	0.975781	0.00391462	0.0301748
Zcchc11	0.399272	0.0115921	0.087229	0.0152908	0.898067	0.941149	0.520302	0.00349107	0.0532608	0.47611	0.0627688	0.462919	0.140145	0.519548	0.723761
Etohi1	-0.431701	0.0116042	0.087229	-0.704383	0.000615021	0.00326726	-0.198073	0.364527	0.746644	0.395615	0.485334	0.883257	-0.0599334	0.933717	0.969576
Il4ra	-0.347761	0.0117045	0.0878877	-0.242105	0.0966226	0.194142	-0.383309	0.0360394	0.245593	-0.308244	0.375521	0.833292	-0.231367	0.272376	0.50283
Tesk1	0.430437	0.0117119	0.0878957	0.713957	8.00566e-06	7.91281e-05	0.491052	0.0114184	0.12141	-0.263101	0.430216	0.860551	0.688697	0.000220631	0.00366898
Jund	0.419391	0.0117379	0.0880099	0.34562	0.369045	0.516434	0.484106	0.0122727	0.127287	0.183964	0.757642	0.961752	0.944678	0.00115507	0.0122332
Acsf2	0.362899	0.0117397	0.0880099	0.0308681	0.808869	0.87877	0.464509	0.00661743	0.0833401	0.351574	0.248344	0.755708	0.490916	0.00231732	0.0205801
Copb2	0.396773	0.0117719	0.088204	0.389841	0.00212995	0.00918236	0.149952	0.455001	0.803971	-0.329675	0.38584	0.837041	-0.0669306	0.637975	0.80486
Ppapdc2	-0.467228	0.0117931	0.0882731	-0.642816	9.55589e-05	0.000676621	-0.127928	0.58751	NA	0.435699	0.164215	0.66873	-2.08326	6.75e-07	4.08e-05
Atxn7l1	-0.342323	0.0117938	0.0882731	-1.36326	2.6819e-10	7.46564e-09	-0.232332	0.122021	0.480395	1.02782	0.0031155	0.0964024	-0.268435	0.217194	0.43858
Egln2	0.392029	0.0118142	0.0883485	0.37023	0.00041943	0.00235534	0.391496	0.0299662	0.219915	-0.0189145	0.930023	0.992649	0.448875	0.00361463	0.0286374
Naip5	0.397748	0.0118166	0.0883485	-0.331529	0.542019	NA	0.479691	0.00342974	0.0525553	0.747627	0.145087	0.644212	0.542559	0.0410347	0.153663
Dusp28	0.432224	0.01184	0.0883811	0.625939	1.08685e-07	1.71624e-06	0.38838	0.0535232	0.312589	-0.305717	0.396553	0.844656	0.444855	0.197882	0.41483
Ddhd1	0.398385	0.0118364	0.0883811	0.348494	0.0120369	0.0377091	0.362837	0.0301318	0.220605	-0.0677151	0.791194	0.967989	0.0988562	0.531508	0.731732
Parvb	-0.414352	0.0118391	0.0883811	-0.109062	0.848596	NA	-0.333779	0.077289	0.381107	-0.38576	0.483509	0.882781	0.110171	0.771729	0.88728
Polh	0.356237	0.0119443	0.0891121	0.284373	0.0124987	0.0388562	0.231457	0.149839	0.534697	-0.131147	0.586158	0.915346	0.679266	0.0129692	0.0699404
Rnf6	0.430063	0.0120128	0.089575	0.449676	0.000154697	0.00102392	0.365283	0.0340595	0.237576	-0.138784	0.521336	0.895142	0.845031	0.000135131	0.00252036
Ash2l	-0.377789	0.0120568	0.0896246	-0.708856	0.309387	NA	-0.292193	0.10088	0.436521	0.762471	0.330283	0.809488	-0.642499	0.00339312	0.027494
Ifnar1	0.381196	0.0120538	0.0896246	0.317125	0.00500705	0.0185207	0.284117	0.0954034	0.425118	-0.112501	0.644047	0.934388	0.446765	0.00429348	0.0320504
Set	-0.401172	0.0120481	0.0896246	0.11725	0.853098	NA	-0.320677	0.0881915	0.407187	-0.645006	0.306202	0.798101	-0.469758	0.0252403	0.110999
Srl	-0.331653	0.0120497	0.0896246	-0.283393	0.0267363	0.0713676	-0.359639	0.01692	0.154442	-0.194726	0.474504	0.879252	-0.249992	0.593778	0.775063
Cox7c	-0.391997	0.0120337	0.0896246	-0.540788	1.42209e-06	1.73182e-05	-0.0219664	0.916514	0.983825	0.407559	0.421205	0.855714	-0.0344207	0.890101	0.951481
Pold3	0.371074	0.012058	0.0896246	0.264041	0.0183946	0.0530076	0.393375	0.0153127	0.145392	0.073452	0.729654	0.954674	-0.0109475	0.940878	0.972503
Scarb1	-0.352736	0.0121098	0.0898655	-0.1104	0.336857	0.485216	-0.475589	0.0048993	0.067768	-0.514471	0.0315425	0.337108	-0.56047	0.00296802	0.0247406
4732440D04Rik	0.440209	0.0121067	0.0898655	0.223611	0.274983	0.419667	0.525946	0.00908311	0.103382	0.292845	0.464496	0.876163	2.22474	0.0104438	0.0605477
Bcl6	0.367621	0.0121385	0.0899823	0.303218	0.0298021	0.077616	0.450145	0.00763253	0.0914918	0.0885467	0.670822	0.940629	1.14484	0.0409631	0.153487
Ncoa4	0.367229	0.0121343	0.0899823	-0.0550637	0.619742	0.738135	0.703973	0.000172788	0.00530123	0.771578	0.00252654	0.0866082	0.60325	0.041348	0.154229
Tmx3	-0.427317	0.0121785	0.0902312	-1.07983	1.41454e-19	1.2761e-17	0.261613	0.273514	0.681131	1.33845	0.000820751	0.0405652	0.372455	0.182684	0.395624
Jdp2	-0.398346	0.012225	0.0905015	-0.497587	0.0419797	0.101592	-0.404462	0.0209297	0.175726	-0.0448818	0.88115	0.982948	-1.79996	3.98e-05	0.000959436
Smap1	0.405377	0.012228	0.0905015	0.287446	0.0408218	0.0993571	0.39811	0.0303087	0.221116	0.0377766	0.899576	0.985761	0.110294	0.674982	0.827803
Sh3bp5	-0.319706	0.0122882	0.0908506	0.153801	0.248797	0.391857	-0.432113	0.00248964	0.0419833	-0.703248	0.000358592	0.0245879	-1.36448	0.000294338	0.00455867
Tbl3	-0.407248	0.0122841	0.0908506	-0.500223	6.7486e-05	0.000503073	-0.392322	0.0393208	0.259982	-0.0155096	0.952369	0.996251	-0.271481	0.0640821	0.204352
Trmt11	-0.360986	0.0123472	0.0911899	-0.760123	1.09656e-10	3.2672e-09	-0.229159	0.223074	0.63206	0.414049	0.170457	0.673129	-1.13312	1.18e-05	0.000371406
Lpar6	-0.454809	0.0123467	0.0911899	-1.14204	3.07719e-10	8.44538e-09	0.0719409	0.737135	0.928314	1.16322	0.0534637	0.435564	-0.236153	0.530685	0.731517
Rps27	-0.425697	0.0124053	0.0915706	-0.513645	0.000208855	0.00131113	-0.579162	0.0169884	NA	-0.314092	0.533747	0.899704	-0.307964	0.473452	0.687394
Ndufb10	-0.405387	0.0124539	0.0918808	-0.211107	0.107051	0.209691	-0.782954	1.79743e-06	0.000116992	-0.719506	0.00496434	0.127142	-0.0500245	0.695112	0.841168
Abi1	0.351942	0.0124846	0.0920585	0.0364507	0.779607	0.857787	0.465244	0.0085168	0.0985193	0.401635	0.157632	0.65901	0.418306	0.0254446	0.111474
Pdhx	-0.368307	0.0125454	0.0923597	-0.880596	3.76604e-09	8.17206e-08	-0.101036	0.572092	0.861385	0.67449	0.0573029	0.44554	0.139683	0.364446	0.593211
Aldh2	-0.357113	0.0125347	0.0923597	-0.239731	0.0313497	0.0809113	-0.37366	0.0193352	0.166969	-0.248437	0.171488	0.67418	-0.154307	0.382973	0.611467
Gsn	-0.360274	0.0125388	0.0923597	0.733861	2.30788e-05	0.000195358	-0.556476	0.000742038	0.0172552	-1.44143	1.99745e-09	2.16432e-06	-0.0120246	0.971191	0.986446
Dnajc10	0.406496	0.0126719	0.0931924	0.404027	7.58084e-05	0.000555339	0.429742	0.0190135	0.165836	-0.00075882	0.99781	1	-0.000900895	0.996103	0.998426
Map2k4	0.398091	0.0126908	0.0932826	0.361842	0.00138388	0.00643588	0.239982	0.229093	0.639871	-0.202746	0.556014	0.906083	0.108512	0.441664	0.660775
Cyb5b	0.338674	0.0127029	0.0933222	0.304915	0.00630858	0.0223589	0.25593	0.109191	0.454141	-0.139889	0.641853	0.933916	0.275924	0.00788186	0.0497715
Sdad1	-0.358253	0.0127358	0.0935144	-0.469427	0.000163734	0.00106993	-0.479995	0.00305047	0.048284	-0.129313	0.635589	0.932686	-0.341987	0.125187	0.316394
Ero1l	0.409688	0.0128369	0.0941575	0.356583	0.00677978	0.0237483	0.201596	0.332206	0.727422	-0.27994	0.517714	0.894108	0.811022	0.023464	0.104996
Kdm3b	0.355775	0.0128902	0.0944989	0.457028	0.00076293	0.00389787	0.34124	0.030363	0.221116	-0.166118	0.532551	0.899484	0.511615	0.00658235	0.0435479
Ube2t	0.396593	0.0129096	0.0945912	0.323759	0.00286661	0.0117203	0.28128	0.212341	0.620063	-0.0663403	0.827711	0.976145	0.494058	0.0101207	0.0595293
Tab2	0.401688	0.0129164	0.0945912	0.333548	0.0239554	0.0652861	0.345351	0.0472692	0.290133	-0.0547719	0.860509	0.981273	0.347801	0.0719194	0.221325
Ppil3	-0.407721	0.012937	0.0945935	-0.681418	1.75818e-05	0.000155303	-0.301711	0.0979875	0.431066	0.244884	0.490993	0.886007	-0.875669	0.00572767	0.0390891
Cdc42	0.396034	0.0129341	0.0945935	0.335242	0.00100473	0.004954	0.361716	0.0495043	0.297475	-0.0424875	0.885596	0.982982	0.100694	0.426364	0.647691
Rpl36a	-0.39687	0.0129371	0.0945935	-0.446817	0.00311532	0.0125631	-0.524569	0.00397793	0.0585714	-0.219995	0.621254	0.928466	-0.212913	0.455864	0.671776
Cxcr5	-0.369768	0.0129996	0.0948516	0.41285	0.36505	NA	-0.326612	0.0365644	0.248121	-0.962865	0.0197334	0.267016	3.21534	2.14e-05	0.000593571
Zbtb5	0.342093	0.0129958	0.0948516	0.164487	0.20902	0.345576	0.451433	0.00370427	0.0553614	0.244571	0.30733	0.799122	0.491192	0.00137424	0.013897
Ssh3	0.461049	0.012991	0.0948516	0.691775	0.0150329	0.0450523	0.467938	0.0227765	0.186182	-0.28268	0.423121	0.856805	0.746856	0.0056429	0.0386138
Sh3glb1	0.391112	0.0129968	0.0948516	0.405166	0.000919032	0.00459657	0.342356	0.0419933	0.271646	-0.13296	0.554786	0.905225	0.0579841	0.675366	0.828115
Spata6	0.465921	0.0130086	0.0948675	0.602914	9.869e-05	0.000694752	0.265047	0.229919	0.640929	-0.3727	0.338212	0.814762	-0.309709	0.248369	0.475833
Ccdc63	0.387088	0.0130411	0.0949551	-0.69872	0.196306	NA	0.478422	0.00706593	0.0866385	1.18066	0.00978816	0.187359	-1.38	0.189602	0.40392
Ergic1	-0.352439	0.013034	0.0949551	-0.157462	0.250698	0.39377	-0.393045	0.0180773	0.160385	-0.36684	0.184956	0.68879	-0.177176	0.458823	0.673822
BC028528	-0.416667	0.0130542	0.0950013	-0.926103	0.000273196	0.00164814	-0.214636	0.231435	0.64229	0.741533	0.208768	0.715812	-0.750163	0.00139599	0.0140448
Arhgap33	0.371556	0.0130954	0.0951515	0.599089	5.50525e-06	5.71221e-05	0.194258	0.257944	0.66695	-0.489877	0.0512496	0.426656	0.354465	0.134797	0.329299
Cct5	-0.343071	0.0131058	0.0951775	-0.470913	4.3574e-06	4.63473e-05	-0.30386	0.0645497	0.347014	0.0558617	0.762119	0.962826	-0.0689891	0.658955	0.818611
Ptpn22	-0.41454	0.0131459	0.0952793	-0.797549	0.00697961	0.0242606	-0.346255	0.0380739	0.255104	0.474995	0.628547	0.93001	-0.305651	0.144336	0.343897
Rapgef6	0.402432	0.0131449	0.0952793	0.34847	0.000286497	0.00171458	0.361756	0.0788183	0.383784	-0.0229338	0.944759	0.995278	0.298758	0.149417	0.349561
Hmgb3	0.42647	0.0131436	0.0952793	0.481801	3.54197e-05	0.000286913	0.422784	0.0422423	0.27276	-0.0821152	0.83086	0.976789	0.331059	0.264101	0.493768
Camk2a	-0.394284	0.0131472	0.0952793	-0.793501	0.12704	NA	-0.313259	0.0754745	0.376535	0.467166	0.314725	0.801429	-0.0750039	0.900616	0.955759
Irf2	0.353719	0.0131905	0.0955434	0.355321	0.0694766	0.151164	0.42113	0.0117896	0.124112	0.0570039	0.898241	0.985538	0.133104	0.675578	0.828194
Timm9	-0.371866	0.0132029	0.0955838	-0.560627	2.77108e-06	3.11762e-05	-0.403604	0.0335985	0.235646	0.00329149	0.990829	1	-1.03417	9.85e-06	0.000324011
Dpf1	-0.411262	0.0132271	0.095709	0.00218436	0.996033	NA	-0.337271	0.0772939	0.381107	-0.45044	0.422849	0.856768	-0.328674	0.106823	0.285682
Thrb	-0.439284	0.0132413	0.0957256	-0.288868	0.182347	0.311466	-0.42579	0.0233467	0.188738	-0.27756	0.411972	0.84958	-1.63347	2.59e-06	0.000107812
Ctbs	-0.400198	0.0132431	0.0957256	-0.84316	2.01611e-08	3.79208e-07	-0.0712857	0.744489	NA	0.684603	0.0314805	0.336954	-0.882327	0.0296325	0.123263
Gnpda1	0.411185	0.0132592	0.0957926	0.309428	0.0777789	0.164847	0.239995	0.239412	0.648518	-0.151065	0.577555	0.912258	0.554082	0.0290773	0.121747
Slc7a1	-0.316131	0.0132713	0.0958297	-0.0964705	0.370666	0.518135	-0.340393	0.0237509	0.190788	-0.352161	0.163352	0.667723	0.00674305	0.985017	0.992875
Rps6ka1	0.371778	0.0133197	0.0960297	1.34665	1.55231e-13	7.00191e-12	0.348583	0.0540292	0.31405	-1.10727	0.000499826	0.0297069	0.975655	1.27e-07	1.11e-05
Slc35b1	-0.41457	0.0133265	0.0960297	-0.440594	0.00117179	0.005624	-0.674786	0.000205653	0.00606895	-0.362023	0.187922	0.692561	-0.361162	0.166113	0.374056
Wdr35	0.382126	0.0133175	0.0960297	0.542007	5.93434e-05	0.000448552	0.0996539	0.59553	0.871337	-0.503045	0.0576045	0.446324	0.0245993	0.908823	0.958496
Gm12184	0.418034	0.0133537	0.0961661	0.470323	0.000427518	0.00239248	0.230063	0.241631	0.650497	-0.32412	0.212713	0.718188	2.20439	0.000362411	0.00529581
D17H6S56E-5	0.363643	0.0133593	0.0961661	0.0486755	0.661463	0.770336	0.45763	0.00940987	0.106437	0.345435	0.209048	0.715812	0.994218	0.000662003	0.00831544
Zfp36l2	-0.406943	0.0133791	0.0962591	-0.225959	0.0114016	0.0360906	-0.680549	0.00025239	0.00710211	-0.609876	0.170852	0.673882	-0.74556	0.0737784	0.224961
Dhx32	0.362938	0.0134318	0.0965881	-0.744026	0.245729	NA	0.439813	0.0112121	0.119857	3.4579	0.00398955	0.112619	0.742957	0.00260503	0.0224783
Ulk4	-0.354224	0.0134651	0.0967	0.781085	0.020301	0.0572484	-0.295948	0.0564199	0.321947	-1.263	4.57747e-05	0.00575871	0.709674	0.0825577	0.242447
Psen1	0.335768	0.0134682	0.0967	0.467784	1.5063e-05	0.000135888	0.0556512	0.708184	0.918977	-0.522546	0.0772396	0.502951	0.0690767	0.671507	0.82567
Arl4a	0.38424	0.0134989	0.0968708	0.631237	4.00011e-06	4.29692e-05	0.348573	0.0494635	0.297357	-0.31234	0.232251	0.738153	0.00296798	0.992885	0.997107
Creld1	-0.407133	0.0135518	0.0971467	-0.296422	0.0830503	0.173267	-0.537683	0.00402057	0.0590121	-0.333336	0.352488	0.822952	-1.28952	5.96e-07	3.69e-05
Kars	-0.38625	0.0135516	0.0971467	-0.476813	0.00705338	0.0244942	-0.35295	0.0368313	0.249231	0.0538522	0.883757	0.982948	-0.182931	0.320238	0.552419
Calr	-0.398352	0.0135704	0.0971837	-0.403183	3.55692e-06	3.87208e-05	-0.983932	1.60834e-08	1.73664e-06	-0.752297	0.000387229	0.0258508	-0.19436	0.274259	0.505356
Ckap5	0.418078	0.0136304	0.0975634	0.420732	0.000267174	0.00161883	0.37253	0.0678897	0.355201	-0.0990588	0.774776	0.965	0.00921025	0.953659	0.97795
Osbpl9	0.332538	0.0136417	0.097594	0.283726	0.0613825	0.136916	0.40225	0.0110759	0.118774	0.0505629	0.822522	0.975413	0.647326	0.000954868	0.0107271
Lhfpl1	-0.524346	0.0136812	0.097826	-1.75561	7.66344e-05	0.000560127	-0.40111	0.0678775	0.355201	1.63889	0.0164047	0.24291	0.668493	0.440848	0.660263
Acd	0.436735	0.0137038	0.0979372	0.0794365	0.561387	0.691363	0.845465	7.0734e-05	0.00260967	0.805673	0.00740016	0.160614	0.463808	0.00369426	0.0290488
Nudt2	0.407513	0.0137518	0.0982304	0.440806	0.0012415	0.00589469	-0.240396	0.257536	NA	-0.805571	0.00317967	0.0973669	-0.0588202	0.782087	0.892934
Ncoa1	0.353102	0.0137652	0.0982754	0.274056	0.0386558	0.0952995	0.352167	0.0298192	0.219183	0.00520639	0.982677	1	0.0766033	0.680412	0.831484
Atpif1	-0.382164	0.0138167	0.0985424	-0.187204	0.0815492	0.170721	-1.44158	3.75118e-14	1.375e-11	-1.5029	1.13703e-12	2.66936e-09	-0.466554	0.0671145	0.21119
Sec14l1	0.384981	0.0138801	0.0988931	0.73084	2.57667e-07	3.79222e-06	0.184582	0.316105	0.714012	-0.678929	0.0591944	0.451686	0.508558	0.0251698	0.110888
Tnfrsf13c	-0.454445	0.0138753	0.0988931	-0.718127	6.69589e-05	0.000499908	-0.0161582	0.949955	NA	0.639183	0.0335507	0.345809	-0.693225	0.0806822	0.238569
Fam195a	-0.402444	0.0138926	0.0988976	-0.411306	0.00509247	0.0187584	-0.578965	0.00216219	0.0379955	-0.336681	0.24841	0.75572	-0.967237	0.0024455	0.0214609
Pigh	0.42084	0.013902	0.0988976	0.325119	0.0446263	0.10696	0.116165	0.628568	NA	-0.297353	0.357568	0.82589	0.498031	0.172203	0.382867
C030046E11Rik	0.390416	0.0138956	0.0988976	0.812646	3.69932e-10	9.9565e-09	0.155708	0.364281	0.746611	-0.743044	0.00283334	0.090987	0.194236	0.193039	0.40861
4932438A13Rik	0.415138	0.0139308	0.0990515	0.449557	6.4743e-05	0.00048592	0.341722	0.105321	0.445227	-0.146967	0.673216	0.941807	-0.050623	0.782558	0.893052
Angel1	0.45232	0.0139512	0.0991463	1.21074	1.80073e-06	2.14218e-05	0.0938051	0.638975	0.892344	-1.22857	0.0001643	0.0141984	1.47342	0.0845302	0.246071
Smc6	0.402722	0.0139613	0.099167	0.224557	0.0482825	0.113769	0.50359	0.00673838	0.0843275	0.25256	0.377435	0.833757	0.200962	0.38079	0.608977
Tirap	0.40473	0.0139925	0.0992878	0.180645	0.369991	0.517488	0.516881	0.00697438	0.0860461	0.342439	0.301732	0.795023	0.445561	0.0775106	0.232532
Naprt1	-0.377605	0.0140062	0.0993345	-0.36204	0.0342608	0.086491	-0.353407	0.0520689	0.306693	-0.0921436	0.766901	0.964531	-0.0538723	0.929796	0.96804
Itch	0.340688	0.0140493	0.0995895	0.227375	0.031524	0.081275	0.305567	0.0916834	0.416677	0.0135682	0.960883	0.9983	0.06612	0.634947	0.802376
Pycr2	-0.424029	0.0140645	0.0996462	-0.641269	9.69334e-06	9.2955e-05	-0.184791	0.351834	0.73977	0.358215	0.266271	0.77152	0.0823943	0.611393	0.786545
Grhpr	0.350031	0.0141011	0.0998548	0.387953	0.00355573	0.0139748	0.174175	0.309816	0.708863	-0.336545	0.357003	0.825338	0.609777	0.136905	0.332963
Wdr47	0.375263	0.0141885	0.100422	0.242653	0.105534	0.207427	0.322841	0.0626617	0.340356	0.00903166	0.978745	1	1.10084	0.0042117	0.0316547
Mettl22	-0.369791	0.0142379	0.100721	-0.455441	4.97922e-05	0.000387171	-0.452338	0.0100349	0.111327	-0.112297	0.582998	0.914727	-0.323536	0.122061	0.311318
Rnf130	0.38333	0.0142831	0.100989	0.489169	0.000696704	0.00363618	0.193234	0.291181	0.693776	-0.365686	0.204807	0.712669	0.13556	0.423052	0.644578
Atp1a1	-0.358905	0.0143503	0.101413	-0.444849	0.000466127	0.00257162	-0.44358	0.00734266	0.089246	-0.154989	0.622789	0.929152	-0.0755642	0.719016	0.856233
Gm6055	0.505545	0.0143734	0.101525	0.532438	0.00470214	0.0175933	0.0397518	0.865662	NA	-0.366018	0.670454	0.940622	1.43794	0.0837678	0.244465
Tmem183a	0.407646	0.0144222	0.101818	0.303534	0.00902338	0.029903	0.283222	0.0935135	0.42081	-0.0882485	0.713292	0.951212	0.196984	0.246419	0.473564
1110034G24Rik	0.341048	0.0144551	0.101998	0.434785	0.0148818	0.044682	0.285839	0.0667528	0.352903	-0.210094	0.371326	0.830633	0.751146	0.0830564	0.243304
Zcchc10	-0.400737	0.0144643	0.102012	-0.699997	4.71463e-07	6.46966e-06	0.193958	0.388141	NA	0.855501	0.00253357	0.0866212	-0.213601	0.573607	0.760803
Slc12a6	0.33072	0.0144863	0.102115	0.277699	0.0175822	0.0511199	0.414077	0.0088254	0.100927	0.0642016	0.75999	0.962387	0.347823	0.0518072	0.178163
Fam198a	-0.447063	0.0145217	0.102279	-0.905016	0.0604683	NA	-0.360661	0.0527187	0.309447	0.570267	0.22447	0.731241	-2.16868	4.84e-05	0.00111842
Pop1	-0.340923	0.0145242	0.102279	-0.538467	4.00242e-05	0.000318591	-0.373363	0.0192934	0.166815	0.0574712	0.829321	0.976197	-0.516651	0.00205194	0.0186783
Nr3c1	0.398605	0.0145369	0.102316	-0.460876	0.00984627	0.0320286	0.518099	0.00538137	0.0723525	0.971711	0.00325211	0.098303	0.34298	0.0295671	0.123111
H2-Q6	0.408198	0.0145732	0.102437	0.331343	0.0537993	0.123917	0.374402	0.0616302	0.337748	-0.0129743	0.962138	0.99837	0.687062	0.00541617	0.0376068
Usp32	0.367865	0.0145761	0.102437	0.300478	0.0148623	0.0446374	0.389008	0.0223069	0.183096	0.0414755	0.893349	0.983998	0.318692	0.128744	0.321721
Hspb11	0.385849	0.0145622	0.102437	0.267072	0.0897845	0.18358	0.437023	0.0137191	0.136299	0.154163	0.590929	0.916566	0.258363	0.569012	0.758349
Sdc4	0.379955	0.0146504	0.102856	0.592321	0.175139	NA	0.44613	0.0137005	0.136213	-0.217728	0.595368	0.917465	1.33247	1.23e-05	0.000383295
Gxylt1	0.377442	0.0146504	0.102856	0.311145	0.0189601	0.0542526	0.154952	0.322956	0.71985	-0.273905	0.328275	0.808971	0.362077	0.427025	0.648061
Mgst3	-0.408893	0.014668	0.102927	0.154547	0.419465	0.562606	-0.7907	4.28857e-05	0.00175178	-1.15433	0.00441698	0.120344	-0.0430367	0.879656	0.945282
Dopey1	0.398267	0.0147739	0.103618	0.407473	0.00181524	0.00803906	0.270604	0.129037	0.494065	-0.210739	0.471088	0.878718	-0.115045	0.481734	0.69411
Atp6v1f	0.389487	0.0148363	0.103951	0.14119	0.311765	0.459674	0.637153	0.00138198	0.0278173	0.496779	0.220372	0.728725	-0.0325896	0.825249	0.915765
Eftud1	-0.340319	0.0148454	0.103963	0.183735	0.190424	0.322716	-0.327038	0.0338235	0.236747	-0.63718	0.0120031	0.206518	-0.0584247	0.812516	0.908952
Depdc5	0.33261	0.014855	0.103978	0.409439	0.000299057	0.00177665	0.146841	0.344349	0.734635	-0.358043	0.166199	0.669682	0.195918	0.2023	0.420756
Pgap1	0.406263	0.0148849	0.104134	0.354882	0.0606176	0.135619	0.402842	0.0502202	0.299836	0.0642549	0.850492	0.979262	1.31506	0.00845793	0.0523443
Pcyt1a	0.357714	0.0149035	0.104213	0.12008	0.468631	0.608945	0.350682	0.052825	0.30968	0.180287	0.536283	0.899704	0.736297	0.0333155	0.133367
Dpp7	-0.429029	0.0149725	0.104642	-0.246426	0.528651	0.663176	-0.390947	0.0376797	0.253288	-0.25281	0.500033	0.886951	0.625632	0.0223553	0.101504
Ftsj1	-0.420959	0.0149842	0.104654	-0.853233	0.00200057	0.00871715	-0.213752	0.248321	0.6574	0.520126	0.385069	0.836975	-0.220742	0.289547	0.521258
Pycr1	-0.373022	0.0149892	0.104654	-0.497699	0.000854929	0.00431361	-0.322916	0.0662976	0.351928	0.0805771	0.750272	0.960383	-0.239454	0.291673	0.523387
Rsph9	-0.388071	0.0150094	0.104742	0.384209	0.205555	0.341937	-0.34392	0.0562564	0.321432	-0.869067	0.00954611	0.185471	-0.622394	0.0246124	0.109064
2810474O19Rik	0.398409	0.0150287	0.104803	0.363009	0.000751507	0.00385365	0.287008	0.126767	0.489098	-0.160822	0.644368	0.934388	-0.0512439	0.836939	0.922846
Shisa5	-0.380273	0.0150547	0.104901	-0.254673	0.100551	0.200301	-0.564024	0.00139328	0.0279907	-0.44126	0.102457	0.56134	-1.16114	3.07e-05	0.000790814
Ivd	-0.3691	0.0150777	0.104956	-0.733707	1.28987e-06	1.60091e-05	-0.194142	0.249236	0.658032	0.449568	0.0476818	0.414596	-0.566792	0.000219603	0.00365872
Srpk2	0.342709	0.0150744	0.104956	0.53109	0.00137086	0.00638139	0.385685	0.0136459	0.136059	-0.226705	0.337299	0.814094	0.477008	0.0291529	0.121983
Evpl	-0.385504	0.0150863	0.104964	-0.651598	0.018409	0.0530334	-0.290522	0.105201	0.444989	0.267556	0.457297	0.873542	-0.0300757	0.924851	0.965917
2410015M20Rik	-0.454092	0.0150953	0.104974	-0.559773	0.000501682	0.00273525	-0.421917	0.0471295	0.289831	-0.00468128	0.989416	1	0.12471	0.521841	0.725121
Hes1	0.40381	0.0151097	0.105022	0.402492	0.0163477	0.0482361	0.462895	0.0166709	0.153273	0.0246671	0.931042	0.992652	0.762288	0.00828722	0.0516397
Rps6ka2	-0.366032	0.015122	0.105055	0.103089	0.696423	0.797045	-0.337474	0.0404036	0.265589	-0.569225	0.058221	0.448388	-0.280954	0.27014	0.500717
Cited2	0.340507	0.015135	0.105092	0.201349	0.0164893	0.0485952	0.794386	7.38663e-07	5.14442e-05	0.642564	0.123793	0.603058	1.22039	0.00063536	0.00806813
Pcsk7	0.376732	0.0151491	0.105138	0.342872	0.00184044	0.00813583	0.456304	0.00908463	0.103382	0.0730006	0.796813	0.969633	0.761215	0.000971247	0.0108728
Cpsf6	0.398873	0.0151648	0.105194	0.345398	0.614677	NA	0.465518	0.0136335	0.136032	-0.471093	0.660587	0.93746	0.602153	0.000137505	0.00255807
Mlf1	0.477523	0.0152147	0.105436	0.366314	0.0711503	0.153809	0.359452	0.138506	NA	0.0253387	0.951891	0.996251	-0.362435	0.50989	0.71697
Arhgef18	0.352135	0.015248	0.105447	0.175322	0.723426	NA	0.420251	0.00717761	0.087699	0.139041	0.766094	0.964447	1.42888	4.61e-09	7.17e-07
Pprc1	-0.348092	0.0152541	0.105447	-0.0905485	0.463567	0.605028	-0.343306	0.0392632	0.259932	-0.374004	0.16865	0.671642	-0.853838	0.00311966	0.0257024
C87436	-0.349336	0.0152515	0.105447	-0.575779	3.0736e-05	0.000252496	-0.254934	0.123902	0.484779	0.207559	0.562818	0.907654	-0.628936	0.00791428	0.0499022
Eif6	-0.37743	0.0152406	0.105447	-0.472936	0.00144971	0.00668775	-0.317686	0.0587459	0.329683	0.0924607	0.78525	0.966987	-0.482976	0.0317335	0.129181
Lamb3	-0.407065	0.0152327	0.105447	-0.583524	0.337018	NA	-0.327653	0.0642149	0.346283	0.221939	0.68144	0.944143	0.376858	0.324055	0.555678
Cd274	0.382474	0.0153225	0.105867	0.312031	0.0973742	0.195249	0.314237	0.124402	0.485786	-0.0577027	0.903003	0.986865	2.47083	1.96e-05	0.000559209
Cdk1	-0.342579	0.0153387	0.105926	-0.435311	5.19218e-05	0.00040128	-0.39226	0.0114451	0.121496	-0.0564557	0.832035	0.977485	-0.105767	0.457303	0.672878
Lsr	0.319462	0.015355	0.105986	1.00643	0.146814	NA	0.392193	0.0110867	0.118774	-1.93141	0.060459	0.455388	-0.622232	0.541908	0.739424
Ric8	-0.35078	0.01537	0.106037	-0.556579	5.21425e-05	0.000402555	-0.233332	0.164538	0.558717	0.217228	0.425304	0.858576	-0.106568	0.435466	0.655819
Slc35b3	0.400677	0.0154553	0.106501	0.176721	0.225728	0.365024	0.555762	0.00415394	0.0601442	0.376629	0.225708	0.732334	0.509228	0.0435277	0.159011
Mzt2	-0.378432	0.0154575	0.106501	-0.620011	0.000698577	0.00364359	-0.151794	0.400181	0.771995	0.358641	0.462265	0.875451	-0.242225	0.32938	0.56194
Cd79a	-0.425212	0.0154601	0.106501	-0.918894	1.90869e-09	4.45956e-08	-0.125048	0.511287	0.832378	0.659773	0.155017	0.655699	-0.113899	0.438327	0.658318
Pafah1b2	0.394058	0.0154873	0.106582	0.370457	0.0024348	0.0102295	0.114519	0.501436	0.827548	-0.348218	0.179106	0.682044	0.169096	0.3265	0.558627
Slc39a1	-0.398391	0.0154818	0.106582	-0.728489	5.26318e-08	8.87183e-07	-0.0906631	0.645739	0.893866	0.540818	0.0195863	0.266295	0.101684	0.494503	0.705122
Nfkbil1	-0.347204	0.0155201	0.106703	-0.388231	0.00431106	0.0163562	-0.275714	0.100686	0.436221	0.0341736	0.915388	0.989526	0.101397	0.609698	0.785243
Zcchc6	0.337551	0.0155649	0.10682	0.348521	0.00268727	0.0111318	0.186114	0.211419	0.61965	-0.263058	0.368473	0.828852	0.419806	0.0545039	0.183856
Scai	0.398802	0.0155751	0.10682	0.229458	0.125194	0.235977	0.376288	0.0491264	0.296354	0.0765209	0.825745	0.976006	0.418547	0.19717	0.413727
Gcc2	0.406989	0.0155755	0.10682	0.455521	0.00159617	0.00725349	0.259451	0.188963	0.593743	-0.265707	0.417348	0.854573	0.136604	0.319773	0.551926
Fam114a2	0.384212	0.0155535	0.10682	0.344594	0.00542982	0.0197989	0.0976304	0.569359	0.860094	-0.342726	0.216383	0.722954	-0.0707331	0.791038	0.896875
Gm17305	0.380823	0.015574	0.10682	0.0974676	0.881864	NA	0.449678	0.0145905	0.141035	0.43291	0.547332	0.90254	-0.233894	0.810714	0.907891
Chid1	-0.3415	0.0155956	0.106905	-0.246127	0.0363922	0.0907523	-0.484373	0.00259579	0.0431849	-0.364497	0.116456	0.587218	-0.495388	0.0976262	0.270144
Dis3l	-0.365495	0.0156212	0.106947	0.0739736	0.582656	0.708889	-0.462243	0.00669606	0.0839509	-0.669752	0.0228398	0.287429	0.974119	6.34e-06	0.000224006
Cox6b1	-0.404938	0.0156324	0.106947	-0.527728	0.00410912	0.0157001	-0.372714	0.0428431	0.273672	0.0613902	0.87376	0.98235	-0.467949	0.0169328	0.0839862
Edem3	0.369565	0.0156276	0.106947	0.326253	0.00900167	0.0298513	0.213998	0.191436	0.597794	-0.194867	0.457725	0.873542	0.862883	0.0318845	0.129548
C1galt1c1	-0.419908	0.015613	0.106947	-0.647363	0.000230599	0.0014274	0.147819	0.621976	NA	0.768886	0.111958	0.578095	0.58887	0.0359617	0.140135
Mier1	0.389988	0.0156836	0.107211	0.217251	0.0721321	0.155483	0.490881	0.00845387	0.097965	0.235668	0.360697	0.826517	0.312719	0.0690849	0.214934
Eng	-0.369898	0.0156865	0.107211	-0.143929	0.650063	0.761887	-0.296974	0.0908702	0.41513	-0.276579	0.469838	0.87814	0.170383	0.600061	0.779279
Fam49b	0.336669	0.0157342	0.107432	0.575885	5.04411e-06	5.28439e-05	0.35392	0.0243743	0.193646	-0.315587	0.259605	0.767367	0.583299	0.0467882	0.167024
Nfrkb	0.356171	0.015733	0.107432	0.358704	0.0035366	0.0139221	0.0943024	0.523614	0.837025	-0.35728	0.204051	0.712253	0.151864	0.184999	0.398607
Dennd1b	0.358429	0.0157467	0.107465	0.342112	0.00157812	0.00719495	0.365104	0.0309163	0.224405	-0.0306348	0.916708	0.989724	0.230193	0.451343	0.667978
Klhl5	0.342115	0.0158404	0.107983	0.423907	0.00151141	0.00692298	0.202672	0.181195	0.58234	-0.290932	0.20123	0.710346	0.212949	0.0974293	0.26985
Acyp1	0.363693	0.0158506	0.107983	0.67016	0.311622	NA	0.434358	0.0152425	0.14527	-0.624766	0.331021	0.809629	0.152827	0.623181	0.795224
Chic2	0.366917	0.0158536	0.107983	0.24942	0.0368082	0.0915788	0.396691	0.0170472	0.154994	0.091847	0.693276	0.94644	-0.0766441	0.726242	0.860523
Akr1b10	-0.410977	0.0158835	0.108043	-0.644781	0.00124849	0.00591639	-0.24257	0.214036	0.622793	0.270338	0.560442	0.907176	-0.573092	0.0138661	0.073154
Bmp2k	0.341491	0.0158934	0.108043	0.369859	0.00383021	0.0148322	0.23944	0.119676	0.4766	-0.260479	0.413029	0.850355	0.38963	0.129642	0.322702
Taok2	-0.371305	0.0158898	0.108043	-0.767127	1.19963e-08	2.35644e-07	-0.184431	0.288022	0.690872	0.490997	0.0248906	0.300179	-0.11096	0.451757	0.667978
Fam45a	0.372864	0.015884	0.108043	0.34962	0.00193073	0.00845824	0.209272	0.323783	0.720557	-0.197611	0.545325	0.902137	-0.134426	0.475333	0.689027
Tet3	-0.339359	0.015928	0.108225	-0.250661	0.445046	0.587704	-0.273561	0.0827744	0.393124	-0.149817	0.638881	0.933587	-0.0709889	0.882821	0.947088
Renbp	-0.382242	0.0159837	0.108513	-0.58583	0.0779783	0.165161	-0.292667	0.109121	0.454141	0.224669	0.585993	0.915346	-0.611762	0.0117819	0.0654598
Rnf115	0.374391	0.0160015	0.108565	0.318029	0.0101662	0.032863	0.219523	0.236734	0.646533	-0.190847	0.542932	0.901684	0.188583	0.182754	0.395642
Smad2	0.363442	0.01613	0.109384	0.208331	0.119355	0.227971	0.434214	0.00945872	0.106681	0.178703	0.459071	0.874108	0.331497	0.0247501	0.109523
Cog6	0.359905	0.0161485	0.109456	0.325258	0.00364543	0.0142698	0.121438	0.501886	0.8278	-0.277304	0.238974	0.744347	0.66648	0.000913268	0.0103693
Arhgap19	0.344308	0.016157	0.10946	0.297974	0.00573123	0.0206506	0.13863	0.374637	0.753984	-0.246069	0.224781	0.731241	0.601782	0.00351375	0.0281434
4632415L05Rik	-0.418729	0.0161905	0.109634	-0.348009	0.0353108	0.0884859	-0.526467	0.0220454	NA	-0.360076	0.30064	0.794459	-0.427886	0.34245	0.574517
Kif23	0.377449	0.0162341	0.109876	0.331688	0.00457431	0.0171942	0.251623	0.157226	0.546542	-0.181468	0.580438	0.913439	0.223216	0.109098	0.289477
Stab1	-0.412604	0.0162546	0.10992	-0.742803	0.0836091	NA	-0.330223	0.0780886	0.382857	0.275076	0.547242	0.90254	-1.45312	0.0404923	0.152258
Zbtb37	0.39511	0.0162708	0.109964	0.408999	0.000273409	0.00164841	0.346205	0.060155	0.333161	-0.107944	0.666547	0.939343	-0.165238	0.695651	0.841348
Cnp	0.341617	0.0163062	0.11015	0.708583	8.26295e-10	2.06956e-08	0.0253137	0.877436	0.971913	-0.784125	0.00150625	0.0629587	0.897705	7.04e-05	0.00149501
Abcc1	-0.341728	0.0163164	0.110166	-0.380355	0.0254761	0.0686243	-0.445628	0.00626373	0.080117	-0.208058	0.486511	0.883801	-0.849013	0.000368661	0.00534643
P2rx7	-0.370092	0.0163648	0.110385	-1.48027	2.91681e-05	0.000240631	-0.258318	0.122794	0.48221	1.18117	0.000607348	0.0334205	-3.42792	0.000405948	0.00577559
Ythdf3	0.414953	0.0163844	0.110464	0.293336	0.0128309	0.0395855	0.504244	0.0100631	0.111334	0.192709	0.49279	0.886609	0.337172	0.175006	0.385944
Rpl37	-0.390505	0.0164497	0.110743	-0.44965	0.00258859	0.0107919	-0.480807	0.0071953	0.0878288	-0.15829	0.679561	0.94362	0.210215	0.0437995	0.159751
Noc3l	-0.347358	0.0164398	0.110743	-0.561058	8.78935e-05	0.000628742	-0.320358	0.0472635	0.290133	0.141197	0.549542	0.902837	-0.230629	0.111942	0.294314
Brd4	0.329339	0.0164489	0.110743	0.389726	0.000645986	0.00340576	0.293556	0.0482565	0.292741	-0.213196	0.468495	0.877322	0.228749	0.320899	0.552748
Cpsf3	-0.337285	0.0164981	0.110962	-0.504426	0.00853471	0.0285653	-0.264662	0.0947215	0.424284	0.142066	0.719366	0.952588	-0.472995	0.0872883	0.251023
Atp5g1	-0.392289	0.016539	0.111184	-0.474748	0.000664201	0.0034867	-0.542211	0.00311173	0.0489754	-0.20271	0.436814	0.862473	-0.341073	0.400084	0.624878
Fam174a	0.399176	0.016551	0.11121	0.0857707	0.473056	0.61306	0.723684	0.000209236	0.00612279	0.656115	0.0127824	0.212828	1.22612	0.0193444	0.092048
Ncoa3	0.32519	0.0166153	0.111589	0.304291	0.00247602	0.0103631	0.154185	0.293654	0.695172	-0.243996	0.270738	0.773452	0.129256	0.51763	0.722598
Xrcc5	-0.332108	0.0166764	0.111945	-0.910681	3.57713e-08	6.33672e-07	-0.10928	0.483857	0.818051	0.663036	0.173211	0.67661	-0.681251	0.00754603	0.0482961
Maml2	0.383956	0.0167385	0.112256	-0.420482	0.531293	NA	0.461615	0.00657877	0.0830786	1.19075	0.0784715	0.504909	-2.66535	1.33e-06	6.77e-05
1700020L24Rik	0.42125	0.0167469	0.112256	0.553677	0.403234	NA	0.48175	0.015219	0.145255	-0.558345	0.410567	0.84958	2.1591	0.00611898	0.0411002
Ttc3	0.366444	0.016746	0.112256	0.372793	0.00167271	0.00753803	0.302993	0.0618079	0.338413	-0.161488	0.592024	0.916566	-0.0864023	0.513548	0.719892
Pex7	0.384898	0.016778	0.11241	0.302011	0.0114922	0.0363459	0.222717	0.189326	0.594348	-0.141967	0.528552	0.89782	0.383403	0.102617	0.278461
Rilpl2	-0.334846	0.0167861	0.11241	-0.473881	0.000635748	0.0033536	-0.341105	0.0288024	0.21454	0.0329906	0.903978	0.987099	-0.312314	0.194608	0.41085
Unkl	-0.33755	0.016832	0.112663	0.455601	6.23232e-05	0.000469617	-0.525819	0.000977514	0.0214085	-1.13439	2.57396e-05	0.00377676	-0.60517	0.00468518	0.033997
Dcun1d1	0.355295	0.0168826	0.112912	-0.318224	0.572917	NA	0.423192	0.0141576	0.138436	0.810301	0.0910225	0.534003	0.485908	0.00294647	0.0246092
Bhlhe40	-0.419894	0.0168854	0.112912	-0.697059	1.28785e-05	0.000118373	-0.249148	0.1856	0.589291	0.357915	0.247697	0.754555	-0.299287	0.421628	0.643181
Rab43	0.380925	0.0169212	0.112948	0.295295	0.0845098	0.175523	0.456941	0.0133677	0.134149	0.129595	0.70004	0.947877	1.01942	0.000689169	0.00856226
Letm1	0.338329	0.0169303	0.112948	0.426884	0.000280386	0.00168318	0.119146	0.432001	0.789875	-0.422695	0.0988585	0.552301	0.503715	0.00365896	0.0288601
Cth	-0.34205	0.0169152	0.112948	-0.675982	9.51961e-06	9.16498e-05	-0.0324628	0.882915	0.973283	0.541287	0.146285	0.644697	0.522979	0.0337085	0.134476
Rbl1	0.350483	0.0169929	0.113286	0.377802	0.000794415	0.00403755	0.213786	0.158201	0.54802	-0.270099	0.309494	0.79947	0.388718	0.214299	0.435283
Cltb	-0.372196	0.0170224	0.113382	-0.884833	1.21896e-05	0.000113324	-0.272305	0.129372	0.494924	0.48658	0.114243	0.583471	-0.343243	0.137752	0.334301
Fam134c	0.377256	0.0170838	0.113694	0.31985	0.00726512	0.0250829	0.16342	0.321051	0.718649	-0.275674	0.373203	0.832628	0.521696	0.00312168	0.0257025
Atp6v0e	0.364913	0.0170969	0.113726	0.388771	0.000612697	0.00325668	0.138958	0.39848	0.770956	-0.325609	0.240041	0.745786	0.453725	0.0727849	0.223181
Diexf	-0.347425	0.0172436	0.114323	-0.44992	0.00291147	0.0118788	-0.398209	0.00955079	0.107545	-0.0560288	0.848318	0.979059	-0.436521	0.00861208	0.053121
Hjurp	-0.319514	0.0172114	0.114323	-0.341682	9.24122e-05	0.000656248	-0.473233	0.0020309	0.0366905	-0.239431	0.373924	0.832628	-0.381764	0.0141633	0.0741998
Pmvk	0.347797	0.0172514	0.114323	0.219233	0.106794	0.209354	0.443002	0.0107231	0.116326	0.185587	0.486486	0.883801	0.582784	0.0533632	0.181059
Josd2	-0.387703	0.0172523	0.114323	-0.572061	3.44214e-06	3.77266e-05	-0.156197	0.422465	0.783661	0.321521	0.22663	0.733192	0.0782916	0.705062	0.847349
Mthfd1	-0.324586	0.0172042	0.114323	-0.431975	0.00092046	0.00460135	-0.339784	0.0295446	0.218201	-0.0296986	0.919834	0.990663	-0.00758406	0.966559	0.984509
Zfp82	0.354652	0.0172625	0.114336	0.457419	0.000158398	0.00104067	-0.0181646	0.921111	0.984208	-0.597915	0.0273601	0.317458	0.283215	0.576906	0.763408
Repin1	0.414688	0.0173277	0.114714	0.383927	0.00356512	0.0140004	0.46974	0.0194003	0.167426	0.0688445	0.842256	0.978554	0.286668	0.151571	0.352728
Coro1b	-0.408111	0.0173456	0.114778	-0.714278	4.13969e-07	5.77836e-06	-0.271788	0.192392	0.598624	0.36655	0.270564	0.773452	0.219147	0.112644	0.295357
Il33	-0.460926	0.0173778	0.114936	-0.234782	0.736771	NA	-0.410508	0.0342026	0.238085	0.0127784	0.987117	1	-2.07172	0.0124187	0.067676
Lphn1	0.328655	0.0174086	0.115085	0.4307	0.000593004	0.0031693	0.316511	0.0542878	0.31481	-0.212242	0.389792	0.839905	0.370989	0.066883	0.210964
Trim26	0.382862	0.0174996	0.115337	0.0910986	0.551804	0.683302	0.460684	0.0101058	0.111628	0.320053	0.180107	0.683029	0.632619	0.000292143	0.00453057
Ifitm2	-0.372535	0.0174784	0.115337	-2.01795	5.86555e-25	9.36854e-23	0.933359	2.23644e-06	0.00013845	2.95578	1.96023e-08	1.25508e-05	-1.3665	0.000323121	0.00483998
Asb8	0.357391	0.017495	0.115337	1.02081	0.1446	NA	0.425271	0.0171673	0.155782	-1.59811	0.0902418	0.531415	0.524753	0.00836881	0.0519468
Itpka	0.372024	0.0175046	0.115337	0.0997987	0.588544	0.713967	0.484608	0.00937448	0.106247	0.303025	0.405603	0.847365	-0.6422	0.0816995	0.240852
Rabep2	0.382178	0.0174956	0.115337	0.376746	0.00106494	0.00519413	0.440469	0.0173004	0.15658	0.0179448	0.951499	0.996169	0.198398	0.320779	0.55265
Ift52	0.386733	0.01747	0.115337	0.381527	0.000870486	0.00438755	0.190958	0.2543	0.663446	-0.250917	0.293199	0.790582	-0.100387	0.498966	0.708477
Tmem170b	0.376042	0.017462	0.115337	0.600931	0.000953695	0.0047335	0.226364	0.20654	0.613717	-0.46325	0.152188	0.653423	-0.140731	0.69824	0.842961
Tmem71	0.546993	0.0175409	0.115521	0.416512	0.258809	0.402872	0.683515	0.00550148	0.0731218	0.597962	0.545214	0.902137	1.75241	5.66e-05	0.00126146
Chd6	0.349403	0.0175613	0.115601	0.411837	0.001744	0.00779799	0.390353	0.0160924	0.150235	-0.0800979	0.782072	0.965597	0.173667	0.262147	0.491627
Dok3	0.368211	0.0175813	0.115678	0.479459	0.00203425	0.00883398	0.421187	0.0119673	0.125427	-0.139826	0.694176	0.94644	1.57185	1.83e-11	9.71e-09
Uba1	-0.318181	0.017591	0.115687	-1.09877	1.77651e-12	6.97926e-11	-0.0479537	0.765057	0.939245	0.995918	3.68443e-05	0.00496279	0.0811536	0.622929	0.795224
Aip	-0.346779	0.0176391	0.115935	0.0203213	0.913782	0.950361	-0.346528	0.0438136	0.277779	-0.467319	0.0801043	0.509873	-0.290537	0.0742069	0.226013
Ccdc163	-0.366145	0.0176454	0.115935	-0.78439	8.27917e-05	0.000596627	0.568324	0.00159025	0.0309799	1.35514	0.0948018	0.543917	-0.452691	0.206297	0.425807
Dctn6	-0.360072	0.0176698	0.116041	-0.400855	0.00401109	0.0153859	-0.311562	0.0730143	0.370768	0.000943772	0.998016	1	-0.0331684	0.839413	0.924774
Npm1	-0.373263	0.0176905	0.116122	-0.492672	8.96614e-05	0.000639042	-0.201478	0.307047	0.70727	0.225754	0.53897	0.900875	0.428328	0.153638	0.355018
Ostm1	0.366762	0.0177372	0.116374	-0.317431	0.6038	NA	0.442858	0.0159833	0.149719	0.800751	0.159664	0.661868	0.693089	0.00222799	0.0199115
Galnt14	-0.312664	0.0178099	0.116796	-0.486293	0.00338337	0.0134328	-0.25596	0.078924	0.383784	0.121657	0.679348	0.94362	-0.811936	0.000649526	0.00819906
5430403G16Rik	0.370395	0.0178456	0.11692	0.254249	0.187845	0.319457	0.50845	0.00773818	0.0922348	0.147014	0.79883	0.970843	-0.135684	0.801661	0.902763
BC068281	-0.375816	0.0178388	0.11692	-0.618821	0.00187167	0.00824593	-0.252774	0.157522	0.546863	0.265252	0.433195	0.861913	0.03895	0.873897	0.942643
Itpkb	-0.317349	0.0178617	0.11697	-0.800549	5.38685e-08	9.06461e-07	-0.204399	0.189463	0.594368	0.506156	0.0652332	0.469582	0.408186	0.238051	0.462406
C230081A13Rik	0.347715	0.0178987	0.117157	0.251501	0.0275648	0.0729198	0.430316	0.0165963	0.152949	0.135977	0.753049	0.960383	0.567416	0.0328019	0.132056
Npr1	-0.435645	0.0179208	0.117191	0.120993	0.827904	NA	-0.391409	0.0488011	0.29488	-0.925265	0.113098	0.581126	-2.46041	0.00765479	0.0487964
Psmb8	-0.367772	0.0179587	0.11733	-0.729043	0.000165121	0.00107754	-0.20788	0.268278	0.677488	0.433172	0.212809	0.718338	0.269275	0.165835	0.373721
Axin1	0.338857	0.0179818	0.117426	0.27441	0.0160064	0.0473725	0.18781	0.23296	0.642897	-0.185474	0.496011	0.886875	0.457218	0.000865409	0.0100717
Smurf2	0.359902	0.0181134	0.118229	0.35582	0.00461145	0.0173272	0.199235	0.220283	0.62991	-0.250404	0.371033	0.830373	0.0516605	0.687489	0.83655
Paxip1	0.317779	0.0181243	0.118245	0.344283	0.00508546	0.0187467	0.195491	0.179709	0.581589	-0.237036	0.477694	0.882012	0.480384	0.00468304	0.033997
Nol11	-0.352616	0.0182233	0.118758	-0.613529	7.55192e-05	0.000553637	-0.161878	0.315089	0.713407	0.363286	0.172347	0.675107	-0.46545	0.0136282	0.072257
Ebna1bp2	-0.381865	0.0182292	0.118758	-0.471001	0.000168516	0.0010953	-0.507091	0.0082004	0.0956645	-0.174495	0.433523	0.861913	-0.215367	0.49805	0.707965
Nipsnap3b	0.402435	0.0182249	0.118758	0.412265	0.000183112	0.00117604	0.192428	0.337433	0.729575	-0.267427	0.227405	0.734181	0.0134217	0.953447	0.977812
Grwd1	-0.403452	0.0182606	0.118789	-0.498502	0.000309818	0.00183499	-0.47409	0.0207282	0.174772	-0.111451	0.70893	0.950822	-0.794378	0.000414932	0.00585393
N4bp2l1	0.343503	0.0182601	0.118789	0.355687	0.00325393	0.0130197	0.371737	0.0333249	0.234414	-0.0611703	0.78778	0.967853	0.785026	0.00154206	0.0151196
Herc2	0.333109	0.0182674	0.118789	-0.141715	0.175681	0.302521	0.429519	0.0238412	0.191182	0.534165	0.0746173	0.493224	0.631621	0.00333309	0.0270419
Mff	0.376253	0.0182965	0.118923	0.2685	0.0207985	0.0583137	0.284433	0.184664	0.587928	-0.000889798	0.998054	1	-0.08104	0.727569	0.861259
Nek3	0.352487	0.0183054	0.118926	0.307659	0.0241197	0.0655704	0.181997	0.294804	0.695573	-0.212274	0.463913	0.876154	-0.0618107	0.852808	0.930541
Tbc1d8b	-0.392603	0.0183823	0.119314	-1.47326	2.95014e-11	9.58108e-10	0.127541	0.560785	0.856696	1.59053	0.000345835	0.0244796	-0.42073	0.342965	0.575002
Chd3	0.357546	0.0185315	0.120226	0.666356	4.91744e-08	8.36137e-07	0.367033	0.0381951	0.25547	-0.379887	0.291696	0.789648	0.886755	3.35e-06	0.00013444
Hsd17b10	-0.42032	0.018569	0.120413	-0.428134	0.0107734	0.0344715	-0.65138	0.00386445	NA	-0.402918	0.235402	0.740977	-0.340311	0.153112	0.354566
Tyro3	0.357503	0.0186859	0.121059	0.656274	0.347662	NA	0.426619	0.0166188	0.152953	-0.860564	0.344755	0.817239	0.274874	0.0602054	0.196809
Klc2	0.389795	0.0187374	0.121279	0.654509	0.000391373	0.00223383	0.343254	0.0701276	0.362317	-0.359434	0.209491	0.715812	0.488213	7.05e-05	0.00149501
Fndc3a	0.422992	0.0187546	0.121334	0.334965	0.0133758	0.0410004	0.43888	0.0309841	0.224728	0.0680379	0.849098	0.979242	0.359225	0.0404524	0.152197
Efcab9	-0.478406	0.0187672	0.121359	-1.26064	0.000784652	0.00399836	-0.378829	0.0806325	0.38742	0.818657	0.114733	0.583884	-1.7707	0.0120472	0.0664707
Krtcap2	-0.362595	0.0187799	0.121385	-0.614481	0.0743153	0.159168	-0.283357	0.120559	0.477449	0.376938	0.688614	0.945058	-0.293925	0.395489	0.620963
Slc43a3	-0.382848	0.018826	0.121627	-0.697186	4.83999e-08	8.28753e-07	-0.382493	0.0172772	0.156472	0.237667	0.570766	0.908884	-0.540992	0.00104248	0.0114003
Edc3	0.31616	0.0188533	0.121747	0.320363	0.00480141	0.017882	0.15862	0.280739	0.686037	-0.250042	0.352208	0.822889	0.376496	0.0293036	0.122347
Slc25a47	-0.472609	0.0188681	0.121786	-0.511311	0.325855	NA	-0.402153	0.0573758	0.325005	0.0060859	0.991177	1	0.0738674	0.863397	0.936484
Atxn2	0.314491	0.0188824	0.121822	0.246546	0.0148515	0.0446324	0.347453	0.0265858	0.204593	0.00386781	0.988215	1	0.214905	0.291412	0.523171
Batf	-0.367823	0.0189449	0.122168	-0.254219	0.131174	0.244552	-0.344632	0.0527758	0.309522	-0.216313	0.566926	0.907795	0.165461	0.557693	0.750562
Pex11c	0.433524	0.018968	0.122235	0.0158106	0.977987	NA	0.516115	0.00854158	0.0985714	0.482988	0.415798	0.853476	1.20429	0.0336722	0.134373
Cep120	0.323124	0.0189728	0.122235	0.344571	0.0123188	0.0384542	0.138005	0.378211	0.756694	-0.297323	0.292883	0.789883	0.0532254	0.680833	0.831484
Eif3d	-0.362433	0.019012	0.122431	-0.371818	0.00110821	0.00535844	-0.508139	0.0028607	0.046343	-0.258962	0.197603	0.706667	-0.134419	0.32844	0.561192
Acat1	0.340932	0.0191183	0.123059	0.344763	0.00315811	0.0127042	0.0655906	0.677253	0.907385	-0.397744	0.177006	0.679875	0.244479	0.112285	0.29479
Mtrr	-0.320858	0.0191349	0.123108	-0.787114	6.94635e-09	1.43691e-07	-0.0874662	0.573657	0.862227	0.567606	0.0294902	0.32867	0.343992	0.0525771	0.17957
Btbd8	0.356562	0.0191985	0.123404	0.123056	0.31753	0.466269	0.311561	0.0821363	0.391126	0.150605	0.546746	0.90254	0.926564	0.307439	0.540059
Zfp39	0.393161	0.0192333	0.12357	0.510344	2.18718e-05	0.000186608	-0.0716919	0.696844	0.914754	-0.692937	0.019698	0.266794	-0.0517515	0.762187	0.88147
Rrp1b	-0.33943	0.0192881	0.12371	-0.298381	0.00392698	0.0151407	-0.411345	0.00902985	0.102927	-0.212	0.274729	0.775973	-0.812861	0.00154065	0.0151196
2310047M10Rik	0.422891	0.0192706	0.12371	0.621654	1.13908e-05	0.000107331	0.00619919	0.9764	0.996523	-0.713527	0.0407072	0.381759	0.673275	0.0058241	0.0395568
Scd1	-0.343192	0.0192906	0.12371	-1.63378	6.10528e-21	6.13234e-19	-0.0253237	0.870652	0.971279	1.56277	0.000429037	0.0277645	0.0224806	0.949322	0.976013
Snrpd3	-0.363929	0.0194139	0.124444	-0.609351	1.58939e-05	0.000141938	-0.243062	0.147971	0.530264	0.267152	0.378706	0.834694	0.159994	0.649418	0.81177
Tmem201	-0.369728	0.0194262	0.124466	0.12372	0.383846	0.531824	-0.518008	0.00629088	0.0803168	-0.786777	0.00967328	0.186399	-0.313391	0.314502	0.546525
Slc16a5	-0.433341	0.019471	0.124695	-0.102999	0.784769	0.861328	-0.397677	0.0535733	0.31275	-0.440184	0.288174	0.786144	-1.20414	0.020041	0.0945169
Aldh3a2	0.34093	0.0195018	0.124725	0.462637	0.000104041	0.000726278	0.312565	0.0625474	0.340056	-0.207315	0.315796	0.801602	0.733292	0.000550415	0.00723418
Brms1l	0.368912	0.0195191	0.124725	0.327539	0.00423056	0.0160821	0.408994	0.0266037	0.204618	0.0450583	0.845655	0.978554	0.753605	0.000571816	0.00741617
Mrgpre	-0.397438	0.0195146	0.124725	-0.674247	2.87677e-05	0.00023773	-0.311049	0.130111	0.497071	0.253231	0.451214	0.86944	0.315604	0.213023	0.43352
Phf23	0.390349	0.0195261	0.124725	0.120324	0.363437	0.510962	0.537662	0.00506466	0.0694918	0.467737	0.322791	0.805805	0.0962525	0.692253	0.839705
Scaf11	0.357766	0.0195946	0.125084	0.303336	0.0153406	0.0456517	0.324805	0.0476432	0.291063	-0.0391593	0.86753	0.98185	0.198391	0.146254	0.345884
Uqcrb	-0.349312	0.0196646	0.125435	-0.513284	1.97926e-05	0.00017126	0.418085	0.0514092	0.303809	0.921271	0.0327954	0.34355	-0.512792	0.0846241	0.246232
Mkl2	0.320122	0.0196677	0.125435	0.396778	0.00105354	0.00514258	0.17344	0.239065	0.648518	-0.344495	0.233556	0.738966	0.204871	0.429124	0.649795
Nudt14	0.408384	0.0197555	0.125938	0.678231	1.04736e-06	1.32697e-05	-0.0224475	0.906002	0.981301	-0.823677	0.0124011	0.209119	0.240121	0.231531	0.454375
Rb1	0.358287	0.0197987	0.126156	0.423787	0.00272057	0.0112411	0.325838	0.0609676	0.335733	-0.180708	0.558762	0.90685	0.876495	1.4e-05	0.000428771
3110062M04Rik	-0.353209	0.0198112	0.126177	-0.0706143	0.525108	0.65955	-0.7946	3.32496e-05	0.00141199	-0.884801	0.00108499	0.0493008	-0.134275	0.483183	0.695351
Eef1b2	-0.348006	0.0198226	0.126192	-0.474794	4.5633e-05	0.000357685	-0.298076	0.0918605	0.417191	0.0931864	0.759114	0.962109	-0.280067	0.241332	0.46693
E130308A19Rik	0.325633	0.0198324	0.126197	0.354955	0.00562043	0.0203568	0.19477	0.202979	0.61012	-0.271981	0.322944	0.805805	0.348322	0.145502	0.344943
Ap1b1	0.324125	0.0198448	0.126218	0.595322	5.4611e-05	0.000417641	0.136655	0.35923	0.743788	-0.563227	0.0567609	0.443874	0.415506	0.00153551	0.0151001
Tradd	0.407164	0.0198626	0.126274	0.391545	0.00248042	0.0103765	0.295088	0.124534	0.485941	-0.177833	0.613459	0.925495	0.482646	0.0411388	0.153782
Cdca2	0.341171	0.0199371	0.12669	-0.370211	0.134752	0.249788	0.466316	0.00660361	0.0833167	0.809649	0.0106648	0.195605	0.106832	0.636225	0.803752
Slc25a22	-0.371281	0.0199569	0.126758	-0.245202	0.0318093	0.0818591	-0.416917	0.0239995	0.192193	-0.294831	0.283211	0.782206	-0.817478	0.00241581	0.0212478
Tab3	0.41453	0.0199734	0.126768	0.260083	0.0888636	0.18212	0.403016	0.0798015	0.386017	0.135674	0.713605	0.951339	-0.596254	0.0892727	0.254364
Zfp280b	0.375259	0.0199768	0.126768	0.339329	0.00729692	0.0251838	0.0753878	0.666844	0.902144	-0.369986	0.134648	0.624069	0.343751	0.1433	0.34247
Dars2	-0.323008	0.019998	0.126846	-0.373229	0.024759	0.0669146	-0.337856	0.0684896	0.356899	-0.125411	0.787906	0.967853	0.0516221	0.759147	0.8796
Gpaa1	-0.393418	0.0201386	0.127679	-0.467554	0.000109332	0.000760876	-0.420429	0.0463767	0.28672	-0.131241	0.714284	0.951432	-0.654493	0.000321797	0.0048315
Trnau1ap	-0.342077	0.0201629	0.127775	-0.431981	0.00174612	0.00780108	-0.59925	0.0001041	0.00353659	-0.30085	0.337417	0.814094	-0.647418	0.0122829	0.0673433
Gapdh	-0.343645	0.0201809	0.127831	-1.24453	4.81373e-08	8.26876e-07	-0.242956	0.166478	0.562834	0.954911	0.0210605	0.274684	0.249052	0.176541	0.387984
Scn4b	-0.415365	0.0203023	0.128446	-0.348847	0.285846	0.432319	-0.392905	0.0444034	0.279692	-0.14761	0.686117	0.944459	-1.36349	0.0560371	0.187456
Psmb3	-0.386126	0.0203057	0.128446	-0.609182	0.000126168	0.000861423	-0.220048	0.233236	0.642935	0.293381	0.33855	0.814762	-0.0398889	0.865322	0.936948
Llgl2	-0.388104	0.020347	0.128491	0.232368	0.562016	NA	-0.348271	0.0649982	0.348082	-0.763027	0.0978569	0.549935	1.17673	0.269341	0.49986
Map3k2	0.368385	0.0203497	0.128491	0.45561	0.000484627	0.00265564	0.17667	0.338779	0.730133	-0.35098	0.245686	0.752333	-0.355193	0.460667	0.674975
Bnip3l	0.372403	0.0203281	0.128491	0.442408	0.000746147	0.00383221	0.334874	0.055671	0.319506	-0.155908	0.624483	0.929306	0.11686	0.791973	0.897457
Arl16	-0.400316	0.020344	0.128491	-0.539091	0.000753171	0.00385812	-0.328595	0.0818048	0.390237	0.12721	0.6807	0.943827	0.0828967	0.826535	0.916093
Gtpbp2	0.354176	0.0204032	0.128771	0.466679	7.63307e-05	0.000558745	0.200828	0.277563	0.682526	-0.32212	0.180598	0.684136	0.491318	0.021172	0.0977556
Whsc1l1	0.323237	0.0204497	0.128939	0.395424	0.00118245	0.00566123	0.358696	0.0268477	0.20528	-0.101586	0.628507	0.93001	0.317426	0.026985	0.115642
Rbl2	0.320913	0.0204464	0.128939	0.191957	0.135743	0.251242	0.207914	0.163653	0.556797	-0.0372867	0.896644	0.985036	0.258648	0.199697	0.417166
L3mbtl3	0.329022	0.0204577	0.128939	0.436888	0.0211698	0.0589982	0.325401	0.036957	0.249648	-0.192151	0.435623	0.862052	0.153424	0.308885	0.541096
Pttg1	0.371379	0.020511	0.129216	0.34661	0.00314822	0.0126696	-0.0770628	0.758598	NA	-0.513518	0.157764	0.65901	0.0174424	0.945141	0.974226
Secisbp2l	0.355562	0.0205241	0.12924	0.25298	0.0401746	0.0981299	0.1592	0.311538	0.710459	-0.172136	0.49651	0.886875	0.855569	0.0168869	0.0838564
Cspp1	0.356004	0.0205487	0.129337	-0.205922	0.347609	0.495719	0.44276	0.0107629	0.116576	0.627788	0.152248	0.653423	0.146915	0.620982	0.793515
Nln	0.328711	0.0205603	0.129351	0.530052	7.42759e-05	0.000546992	0.0807704	0.590899	0.868943	-0.514805	0.0333268	0.34415	0.181906	0.276441	0.50791
Spryd3	0.347145	0.0206317	0.129742	0.425753	0.00139556	0.00648398	0.0737678	0.696285	0.914718	-0.454313	0.0966703	0.546692	0.0909575	0.667149	0.823672
Ntn3	0.393935	0.020653	0.129817	0.860037	0.00785705	0.0267195	0.419302	0.0296017	0.218289	-0.522385	0.295172	0.791046	-1.46282	0.0386966	0.147151
Tfap4	-0.353584	0.0207118	0.130106	-0.73285	1.40874e-06	1.72212e-05	-0.229274	0.204067	0.611156	0.411629	0.128146	0.612203	-0.543893	0.0315795	0.128701
Slc12a2	0.364976	0.0207269	0.130106	0.401031	0.0116917	0.03682	0.249058	0.16865	0.565927	-0.338243	0.414207	0.851206	0.407746	0.0669412	0.211016
Pigp	0.384152	0.0207264	0.130106	0.341972	0.0039499	0.015199	0.46022	0.0137747	0.136539	0.0506968	0.880704	0.982946	0.216647	0.588886	0.771994
Gm6710	-0.418611	0.0207473	0.130175	-0.592884	0.0203821	0.0574436	-0.204419	0.373081	NA	0.405648	0.506925	0.890869	-1.3744	0.0491128	0.172154
Dhx37	-0.330194	0.0207869	0.130365	-0.491826	1.86971e-05	0.000162939	-0.322736	0.0930231	0.41987	-0.0694446	0.869888	0.98185	-0.169179	0.491672	0.70249
Idh3b	-0.333196	0.020857	0.130667	-0.0539023	0.627663	0.745133	-0.627908	5.05751e-05	0.00200131	-0.691527	0.00198008	0.074776	-0.226135	0.0875376	0.251385
Fam102a	0.332682	0.0208632	0.130667	0.600759	6.61822e-05	0.000495629	0.0900926	0.592605	0.869896	-0.663688	0.150858	0.650951	0.272179	0.497228	0.707507
Prkd2	-0.318997	0.0208832	0.130733	-0.463539	0.00108978	0.00529036	-0.244519	0.13565	0.506969	0.125645	0.618026	0.927098	-0.0639183	0.651406	0.813007
H2-T24	0.389335	0.020966	0.131193	0.522196	0.13796	0.254332	0.436853	0.0135268	0.135281	-0.148293	0.808648	0.972591	1.07636	0.0469262	0.167258
Helq	-0.3356	0.0210343	0.131502	-0.668282	0.000102646	0.000718445	-0.29171	0.0629432	0.340877	0.286021	0.327157	0.807586	-0.211137	0.306021	0.53831
Wapal	0.403701	0.0210471	0.131523	0.261634	0.0304362	0.0788879	0.428392	0.0428711	0.273672	0.148819	0.664911	0.939176	0.0377407	0.868708	0.938893
Pfkfb1	-0.348409	0.0211259	0.131779	-1.00454	4.29704e-07	5.94688e-06	0.125502	0.516426	0.834511	1.02704	0.0444332	0.403017	-0.699281	0.00221473	0.0198069
Acat2	0.324368	0.0211003	0.131779	0.305121	0.00463662	0.0174083	0.295813	0.0667853	0.352903	-0.0929061	0.621365	0.928466	0.530824	0.0494388	0.172906
Ggh	0.41331	0.0211078	0.131779	-0.0152095	0.954701	0.974003	0.559295	0.00639118	0.0812993	0.546604	0.0923042	0.537716	0.292168	0.222207	0.443933
Derl1	0.331798	0.0211236	0.131779	0.236697	0.0393111	0.0964755	0.314653	0.0496749	0.297985	0.00774038	0.972076	1	0.184242	0.430474	0.650991
Tmem87b	0.3751	0.0211588	0.131925	0.304883	0.00991752	0.0321966	0.331874	0.0540499	0.31405	-0.0238063	0.919069	0.990663	0.272557	0.282776	0.514449
Pon2	0.341864	0.0211762	0.131975	0.24338	0.0269245	0.0717128	0.163911	0.332327	0.727422	-0.167029	0.623876	0.929152	0.194729	0.149246	0.349418
Siah1a	0.377423	0.0212168	0.132169	0.407559	0.00122773	0.0058407	0.229431	0.187988	0.592498	-0.229564	0.323676	0.805859	0.290268	0.204131	0.423184
Mon2	0.343422	0.0212389	0.132188	0.346045	0.0134781	0.0412816	0.154741	0.297739	0.69885	-0.299076	0.289331	0.787711	0.0888499	0.515276	0.720573
Dscc1	0.357831	0.0212747	0.132351	0.324297	0.00566008	0.0204624	0.51111	0.00506882	0.0694918	0.133639	0.548339	0.90254	0.0693383	0.71318	0.852848
Tpm1	0.359032	0.0212973	0.132433	0.359652	0.546345	NA	0.431723	0.0176108	0.157953	-0.181563	0.754257	0.960383	0.233625	0.305309	0.537505
Eef1d	-0.315594	0.0213207	0.13252	-0.278297	0.0134649	0.0412542	-0.316702	0.0449524	0.281146	-0.146794	0.688665	0.945058	-0.18061	0.531627	0.731732
Wdr25	-0.332134	0.0213774	0.132813	-0.423541	0.000361887	0.00208508	-0.367051	0.018816	0.165056	-0.0260641	0.916932	0.989724	-0.145083	0.48479	0.696539
Btf3l4	0.38715	0.0214301	0.133081	0.25974	0.0300576	0.0781563	0.425757	0.037779	0.253724	0.133371	0.669592	0.940294	0.22484	0.142972	0.341944
Ing3	0.34457	0.0215199	0.133578	0.0828304	0.486438	0.625494	0.564707	0.00257265	0.0430988	0.453035	0.0827309	0.517013	0.332569	0.342151	0.574241
Lepre1	-0.350446	0.0215559	0.133683	-0.813664	2.58479e-05	0.000215798	-0.197418	0.272439	0.680739	0.433509	0.217346	0.724044	-0.246527	0.290847	0.522641
Dcun1d4	0.326152	0.0215548	0.133683	-0.592693	0.370516	NA	0.403499	0.015007	0.143665	1.31189	0.0543796	0.438461	0.395299	0.401303	0.625562
AI597468	0.408367	0.0215962	0.133873	0.233433	0.104356	0.20586	0.552881	0.00521374	0.0707378	0.301624	0.390734	0.840195	0.828422	0.000471398	0.006448
Fasn	0.336149	0.0216385	0.133897	0.493984	4.18257e-05	0.000330501	0.217946	0.183355	0.585769	-0.386328	0.221819	0.729945	0.530807	0.0413089	0.154229
Mmd	0.338667	0.0216312	0.133897	1.02644	0.120906	NA	0.410163	0.0189393	0.165707	-1.10409	0.0988327	0.552301	-0.361766	0.178463	0.391063
Zfand2b	0.364822	0.0216346	0.133897	0.485335	8.35335e-05	0.00060064	-0.0160601	0.931716	0.985826	-0.642241	0.0599355	0.453857	0.268404	0.243425	0.469628
Galnt1	0.363522	0.0216278	0.133897	0.330277	0.0048601	0.0180595	0.412207	0.0213984	0.178585	0.0372589	0.879943	0.982779	-0.00161894	0.990575	0.996431
Ttc19	0.362754	0.0216492	0.133904	0.39272	0.00407222	0.0155896	0.284116	0.101928	0.438875	-0.22869	0.528788	0.897843	-0.158451	0.630947	0.800413
Rit1	0.351591	0.0217122	0.134174	0.237474	0.0752144	0.160529	0.195162	0.264313	0.673374	-0.104463	0.705289	0.949796	0.482652	0.00208104	0.0188624
Filip1l	0.351831	0.0217291	0.134219	0.620497	0.28226	NA	0.430051	0.0173368	0.156695	-0.324637	0.632499	0.930677	0.478554	0.0592505	0.194685
Mast2	0.355879	0.0217394	0.134223	0.330889	0.021885	0.0606616	0.280904	0.104184	0.44338	-0.130719	0.679635	0.94362	0.182983	0.446266	0.664324
Chrm4	-0.400048	0.0217722	0.134367	-0.349627	0.353827	0.502015	-0.346175	0.075996	0.377818	-0.0933415	0.827933	0.976167	0.409008	0.637985	0.80486
Ube2q2	0.338348	0.021799	0.134472	0.0353077	0.922716	0.956385	0.415611	0.0161759	0.150757	0.275072	0.466728	0.876965	0.00154605	0.99254	0.997107
Prkaca	0.351109	0.0218772	0.134835	0.482871	0.00120025	0.00573519	0.162142	0.380739	0.757722	-0.443107	0.222883	0.729945	0.547361	0.0292643	0.122281
Gpatch8	0.329293	0.0219279	0.134894	0.253859	0.0166604	0.0489366	0.355348	0.0242456	0.193255	0.0330394	0.886024	0.982982	0.424718	0.0291745	0.122009
Atp1b3	0.411773	0.0219509	0.134894	0.0335398	0.76942	0.849746	0.519658	0.0104309	0.114391	0.523369	0.216991	0.723782	0.310049	0.170391	0.379982
Osr2	-0.417645	0.021936	0.134894	-0.551451	0.0048093	0.017898	-0.427992	0.0286424	0.21392	0.00373711	0.990258	1	0.317647	0.331637	0.56351
E130311K13Rik	0.410488	0.0219246	0.134894	0.393988	0.00250713	0.0104777	0.239437	0.245633	0.656158	-0.188649	0.500081	0.886951	0.470254	0.358104	0.58855
Ap1m2	0.352368	0.0219546	0.134894	0.096802	0.847614	NA	0.421659	0.015462	0.14637	0.0970642	0.824759	0.975915	-0.0182343	0.956671	0.980095
Zfp367	0.385202	0.0220183	0.135149	0.161651	0.147149	0.266382	0.578793	0.0028613	0.046343	0.394895	0.167607	0.670904	0.382959	0.109566	0.290462
Rpia	0.34637	0.0220251	0.135149	0.163764	0.228939	0.369113	0.322052	0.0446767	0.280316	0.0877947	0.691379	0.946246	0.0750973	0.56659	0.756836
Fbxo10	0.331419	0.022078	0.135354	0.558633	8.61403e-06	8.44857e-05	0.110544	0.518076	0.834511	-0.552135	0.0489877	0.418846	0.149768	0.438909	0.658703
2410002F23Rik	-0.335271	0.0221008	0.135434	-0.190694	0.0373381	0.0927551	-0.535991	0.00202263	0.0366747	-0.501582	0.0813498	0.513034	-0.955602	4.54e-06	0.000173048
Fgd3	0.324178	0.0223535	0.136682	-0.245744	0.637152	NA	0.399668	0.0128941	0.131481	0.653996	0.209061	0.715812	1.68414	3.19e-10	9.06e-08
Rufy1	0.323551	0.0223472	0.136682	0.330159	0.00367729	0.0143727	0.263172	0.0973168	0.428964	-0.14949	0.516709	0.894108	0.312302	0.0510613	0.176552
D2Wsu81e	-0.363634	0.0223373	0.136682	-0.369177	0.00170413	0.00765482	-0.560969	0.00325632	0.0505655	-0.34764	0.187197	0.692365	-0.318863	0.136962	0.332999
Stx7	0.335616	0.0223708	0.136728	0.304291	0.0168121	0.0492408	0.0905958	0.584115	0.866566	-0.298808	0.288063	0.786144	0.143882	0.595352	0.775619
Rpa1	0.293856	0.0224014	0.13684	0.373137	0.00229144	0.00974289	0.166526	0.250125	0.659224	-0.306288	0.34563	0.817692	0.476095	0.00274153	0.0233094
Mapt	-0.340804	0.0224175	0.13684	-0.0884606	0.855413	NA	-0.272646	0.0916384	0.416677	-0.375162	0.432861	0.861913	0.267025	0.428046	0.649165
Psd	-0.337421	0.0224186	0.13684	0.519279	0.29159	NA	-0.287497	0.081781	0.390237	-1.0396	0.0300133	0.330804	0.194638	0.605661	0.783171
Narf	0.332144	0.0224381	0.136899	0.160145	0.209515	0.346101	0.368391	0.0357425	0.244527	0.149802	0.685568	0.944279	0.548031	0.0580182	0.19187
Dynlrb1	0.355389	0.0225215	0.137287	0.301156	0.00856552	0.0286488	0.279025	0.113215	0.462457	-0.0797351	0.686499	0.944546	0.0872301	0.668633	0.824374
Hmgn3	-0.341515	0.0225639	0.137288	-0.811847	1.12462e-06	1.40838e-05	-0.183817	0.263959	0.672783	0.562015	0.0167987	0.24623	-1.08295	0.000100931	0.00197861
Itpripl1	-0.393746	0.0225808	0.137288	-0.696489	6.93284e-07	9.15266e-06	-0.0127101	0.949171	0.99062	0.617259	0.0102185	0.192597	0.0581595	0.841828	0.92537
Dcps	-0.297345	0.0225573	0.137288	-0.603492	1.92962e-06	2.28159e-05	-0.214436	0.149613	0.534605	0.284866	0.39441	0.84266	-0.0274114	0.891333	0.952457
Hax1	-0.385022	0.0226554	0.137682	-0.499258	0.00190633	0.00836765	-0.238816	0.257762	NA	0.130298	0.737307	0.956906	0.139399	0.476744	0.690133
Coq10a	0.344339	0.0226688	0.137699	-0.442281	0.355694	NA	0.420827	0.0188204	0.165056	0.724512	0.189479	0.694097	0.192221	0.552192	0.747325
1700088E04Rik	0.386683	0.0226994	0.137709	0.0220418	0.949889	0.971222	0.485774	0.0119862	0.12553	0.409822	0.243334	0.750187	1.38746	0.042453	0.156948
Zfp395	-0.324727	0.0226908	0.137709	-0.0825311	0.620883	0.738977	-0.427986	0.0101796	0.112089	-0.501984	0.101832	0.559982	-0.141165	0.594005	0.775155
Exosc1	-0.343889	0.0227491	0.137951	-0.448417	0.000140461	0.00094185	-0.471118	0.00472653	0.0658	-0.138341	0.534401	0.899704	-0.630523	0.000837103	0.00986437
Azi1	0.362031	0.0228222	0.138229	0.508475	0.000219254	0.0013676	0.268805	0.150339	0.535114	-0.36525	0.32734	0.807657	0.370185	0.0455726	0.164015
Zfp280c	-0.380252	0.02281	0.138229	-1.10848	8.72504e-12	3.036e-10	-0.0775352	0.713556	0.921504	0.961154	0.00665881	0.151612	-0.470235	0.0483592	0.170486
Trip12	0.41993	0.0228247	0.138229	0.448498	0.00186019	0.00820547	0.410281	0.0448298	0.280756	-0.0774728	0.828829	0.976197	0.158263	0.356386	0.58694
Neto2	0.405701	0.0229882	0.139158	0.505063	0.013182	0.0404638	0.356386	0.0928978	0.419595	-0.182533	0.618902	0.927342	-0.407598	0.31131	0.542987
[truncated: 8,579 more rows]
