# Supplementary figures and images for: A high-resolution map of transcriptional repression
Source: eLife journal article supplement (doi:10.7554/elife.22767), 2017-03-20

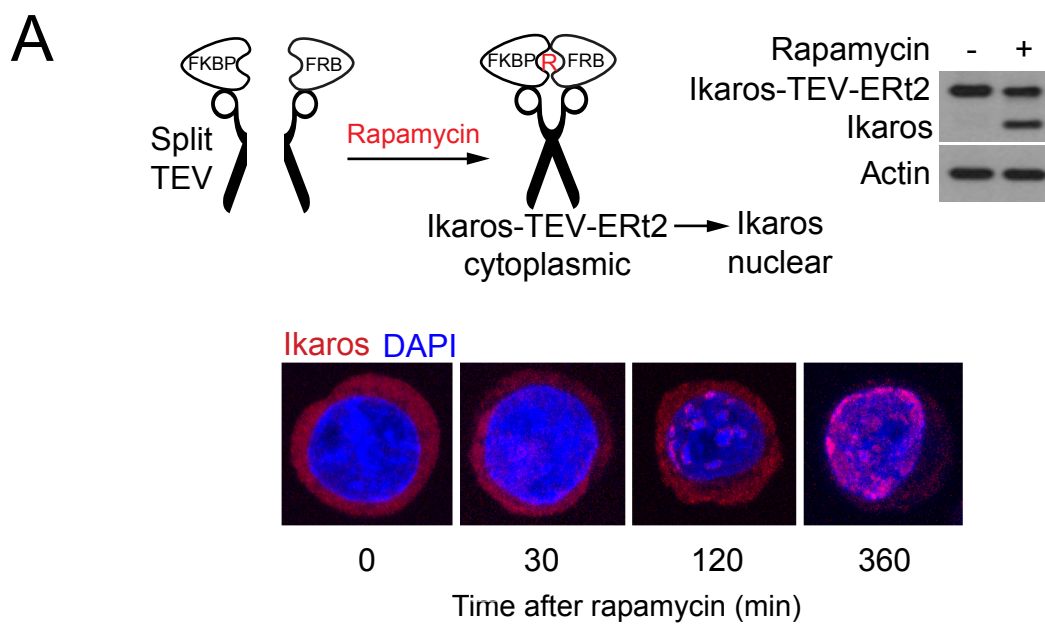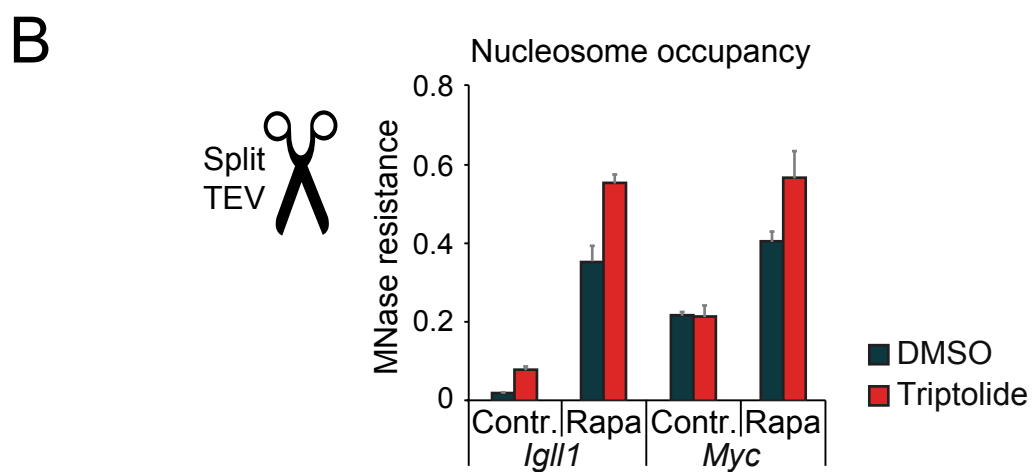

Figure 3 - figure supplement 1

Supplement: supp [file elife-22767-supp-v1.zip]
